# Supplementary material for: Aspectuo-Temporal Underspecification in Anindilyakwa: Descriptive, Theoretical, Typological and Quantitative Issues
Source: Preprints.org preprint supplement (doi:10.20944/preprints202201.0075.v1), 2022-01-06
Supplement: Supplementary file 1 [file Zero tense Anindilyakwa - corpus analysis.xlsx]

## Sheet: Corpus break down
Data type	Audio duration	Word count
Elicited data (translation tasks; stimuli-prompts)	15h16min25sec	19.906
Spoken narratives	01h04min46sec	3789
Translated text (Bible)	-	699
TOTAL	16h21min11sec	24.394

## Sheet: COS vs. CUM
COS vs. CUM UBD	Past	Present	Past>Present	Total number
COS	147	10	6	163
CUM UBD	31	20	0	51
All classes	178	30	6	214
COS vs. CUM	Past	Present	Past>Present	Total number
COS	0.825843	0.333333	1	0.761682
CUM	0.174157	0.666667	0	0.238318
COS vs. CUM	Past	Present	Total number
COS	153	10	163
CUM	31	20	51
All classes	184	30	214
COS vs. CUM	Present	Past
COS	0.333333	0.831522
CUM	0.666667	0.168478
Données série 1: 2L x 2C
Méthode : Fisher's Exact Test for Count Data; Alternative :two.sided
p-value : 6.4554400236716E-8
Odds Ratio : 9.7205 Intervalle de confiance à 95%[3.9072 ; 25.7194]

## Sheet: telicity vs. non telic
Telic vs. non-telic	Past	Present	Total
Telic	112	10	122
Atelic (CUM)	31	20	51
CoS non-telic	41	0	41
Total	184	30	214
Telic vs. non-telic	Past	Present
Telic	0.608696	0.333333
Atelic (CUM)	0.168478	0.666667
CoS non-telic	0.222826	0
Telic vs. non-telic	Past	Present	Total
Telic	112	10	122
non-telic (CUM + COS non telic)	72	20	92
Total	184	30	214
Données série 1: 2L x 2C
Méthode : Fisher's Exact Test for Count Data; Alternative :two.sided
p-value : 0.005528749910568
Odds Ratio : 3.0942 Intervalle de confiance à 95%[1.2947 ; 7.8564]

## Sheet: Dynamic vs. stative
Stative vs. dynamic (CoS non telic excluded)	Present	Past	Total
Stative	11	12	23
Dynamic	19	131	150
Total	30	143	173
Données série 1: 2L x 2C
Méthode : Fisher's Exact Test for Count Data; Alternative :two.sided
p-value : 0.00024116480890917
Odds Ratio : 6.2209 Intervalle de confiance à 95%[2.1625 ; 18.0003]

## Sheet: Dynamic atelic vs. stative
Stative vs. dynamic atelic	Past	Present	Total
Dynamic atelic	19	9	19
Stative	12	11	23
Total	30	143	42
p-value = 0.3877
alternative hypothesis: true odds ratio is not equal to 1
95 percent confidence interval:
0.5360968 7.0437000
sample estimates:
odds ratio
1.909754
Données série 1: 2L x 2C
Méthode : Fisher's Exact Test for Count Data; Alternative :two.sided
p-value : 0.38765323785719
Odds Ratio : 1.9098 Intervalle de confiance à 95%[0.5361 ; 7.0437]

## Sheet: Event structure 0-tense corpus
Event structure - zero-tense corpus	Number of verb forms	Percentage
States	23	0.107477
Atelic dynamic events	28	0.130841
Non-telic CoS events	41	0.191589
Accomplishments	31	0.14486
Achievements	91	0.425234
Total	214

## Sheet: Event structure PST & NPST
Event structure - NPST corpus	Number of verb forms	Percentage
States	10	0.454545
Atelic dynamic events	12	0.545455
Non-telic CoS events	0	0
Accomplishments	0	0
Achievements	0	0
Total	22
Event structure - PST corpus	Number of verb forms	Percentage
States	7	0.0693069
Atelic dynamic events	21	0.207921
Non-telic CoS events	37	0.366337
Accomplishments	6	0.0594059
Achievements	30	0.29703
Total	101

## Sheet: Stative vs. COS
Stative vs. COS	Past	Presnt	Total
COS	10	153	163
Stative	12	11	23
Total	22	164	186
Données série 1: 2L x 2C
Méthode : Fisher's Exact Test for Count Data; Alternative :two.sided
p-value : 1.8964207347575E-7
Odds Ratio : 0.0618 Intervalle de confiance à 95%[0.0188 ; 0.1927]

## Sheet: atomicity
Atomic vs. non-atomic telic	Past	Present	Total
Atomic telic	91	0	91
Non-atomic telic	21	10	31
Total	112	10	122
Données série 1: 2L x 2C
Méthode : Fisher's Exact Test for Count Data; Alternative :two.sided
p-value : 3.2180845867665E-7
Odds Ratio : INF Intervalle de confiance à 95%[8.6249 ; INF]

## Sheet: CUM vs. COS without overt mark
Données série 1: 2L x 2C
Méthode : Fisher's Exact Test for Count Data; Alternative :two.sided
p-value : 1.5262396732922E-8
Odds Ratio : 18.7066 Intervalle de confiance à 95%[5.724 ; 69.8122]
Contextual reading	Past	Present	Total
COS	65	7	72
CUM	9	19	28
Total	74	26	100
Méthode : Fisher's Exact Test for Count Data; Alternative :two.sided
p-value : 1.5262396732922E-8
Odds Ratio : 18.7066 Intervalle de confiance à 95%[5.724 ; 69.8122]
La valeur p (p-value) de votre test est 1.5262396732922E-8.
Commande R
fisher.test(matrix(c(65,7,9,19),2,2, byrow=TRUE))

[truncated: 1 more sheets: Summary of parameters]
