# Supplementary material for: Aspectuo-Temporal Underspecification in Anindilyakwa: Descriptive, Theoretical, Typological and Quantitative Issues
Source: Preprints.org preprint supplement (doi:10.20944/preprints202201.0075.v1), 2022-01-06
Supplement: Supplementary file 2 [file overt-PST-and-NPST-example-corpus-REV2.xlsx]

## Sheet: All PR + PST
Verb root	Verb root gloss	Aktionsart	Complexity	Scalarity	Control	Viewpoint	Overt present in complex clause/clause chain	Overt Past in complex clause / clause chatn	Asp quantif	Temporal succession	Structural context	Example temporal reading	TA context	Overt TA pattern	Example	Example gloss	Example translation	Example source	Genre type of example	Other notes
adhərrə	spear; pierce	achievement	ATM	b	y	PFV		t				past	SoE CoS	V1-PST	ngayuwa ngən-adhərra-ng=ma yiburadha	1.PRO REAL.1>MASC-spear-PST=MUT MASC.wallaby	I speared the wallaby	ST, JRB1-001-01, 00.06.09-00.06.15	elicitation (translation task)
lhəkə	go	achievement	ATM	b	y	PFV		t				past	SoE CoS	V1-PST V2-PST	naka nenungkwarba nə-lakə-nə=ma Umbukumbu=wa nu-ngurrkwa-nə=ma yiburadha	3m.this 3m.man REAL.3m-go-PST=MUT Umbakumba=ALL REAL.3m>MASC-hunt-PST=MUT MASC.wallaby	the man went to Umbakumba to hunt wallabies	CW, JRB1-001-01, 00.14.13-00.14.20	elicitation (translation task)
lhəka	go	achievement	ATM	b	y	PFV		t				past	SoE CoS	V1-PST V2-PST V3-PST	yirra-lhəka-rnə=ma yirri-dirrərndi-nə=ma adalyuma=wa yirri-ngambe-nə=ma yakwujina	REAL.1a-go-PST=MUT REAL.1a-descend-PST=MUT NEUT.river=ALL REAL.1a-swim-PST=MUT there	we went down to swim at the river there	JL, JRB1-007-01, 00.00.36-00.00.41	narrative
dhərrərndhə	descend	achievement	ATM	b	y	PFV		t				past	SoE CoS	V0-PST V1-PST V2-PST	yirra-lhəka-rnə=ma yirri-dhərrərndhə-nə=ma adalyuma=wa yirri-ngambe-nə=ma yakwujina	REAL.1a-go-PST=MUT REAL.1a-descend-PST=MUT NEUT.river=ALL REAL.1a-swim-PST=MUT there	we went down to swim at the river there	JL, JRB1-007-01, 00.00.36-00.00.41	narrative
lhəka	go	achievement	ATM	closed	y	PFV		t				past		V1-PST	akwala+manja wurra-daduyuwangkwa na-lhəka-nə=ma adalyuma=wa	sometimes 3a-old.woman REAL.3a-go-PST=MUT NEUT.river=ALL	sometimes old women also went to the river	JL, JRB1-007-01, 00.00.42-00.00.51	narrative
lhəka	go	achievement	ATM	closed	y	IMPF		t				past		V1-PST=LOC	kemba mining.company na-lhəka-nə=manja arakba yangkwurrangwa	then mining.company 3a-go-PST=LOC compl.act to.here	then when BHP came here	JL, JRB1-007-01, 00.01.15-00.01.20	narrative
lhawurradhə	return	achievement	ATM	b	y	PFV		t				past		V1-PST	biya wurr-ukwala na-lhawurradhə-na	and.then 3a-some REAL.3a-return-PST	[a few of the missionaries stayed here] while others left	JL, JRB1-007-01, 00.01.20-00.01.27	narrative
yadha	arrive	achievement	ATM	b	n	PFV		t				past		V1-PST	n-akən nenəngkwarba ni-yadha-ngə=ma Numbulwar	3m-that 3m.man REAL.3m-arrive-PST=MUT Numbulwar	the man arrived in Numbulwar	JL, JRB1-018-01, 00.02.28-00.02.24	elicitation (translation task)
yadha	arrive	achievement	ATM	b	n	PFV		t				past		V1-PST	ni-yadha-ngə-ma Numbulwar arakba	REAL.3m-arrive-PST=MUT Numbulwar compl.act	he's already got there, to Numbulwar	JL, JRB1-018-01, 00.04.12-00.04.19	elicitation (translation task)
adhərra	pierce; spear	achievement	ATM	b	y	PFV		t				past		V1-PST	yarrungkwa n-akən nenəngkwarba n-adhərra-ngə=ma akwalya	yesterday 3m-that 3m.man REAL.3M>NEUT-spear-PST=MUT NEUT.fish	the man speared the fish	JL, JRB1-018-01, 00.18.25-00.18.35	elicitation (translation task)
abərradhadha	start	achievement	ATM	b	y	PFV		t				past		V1-PST	n-aka nenəngkwarba n-abərradhadha-ngu=ma neni-k-angkarri=yedha	3m.this 3m.man REAL.3m-start-PST=MUT 3m-NSR-run=PURP	the man started to run	JL, JRB1-024-01, 00.20.53-00.21.07	elicitation (video stimuli)
lhəkə	go	achievement	ATM	b	y	PFV		t				past		V1-PST V2-PST	nəmə-lhəke-na arakba makarda=dha narr-am-angka-rnə=ma makina=dha	REAL.VEG-go-PST compl.act VEG-sea=EMPH REAL.3a.O-VEG-fetch-PST=MUT VEG.sea=TRM	It came already to the sea. The sea reached them	A3368a Side1, Chasm Island, 00:02:46.403 - 00:02:49.907	narrative
angka	fetch	achievement	ATM	b	y	PFV		t				past		V0-PST V1-PST	nəmə-lhəke-na arakba makarda=dha narr-am-angka-rnə=ma makina=dha	REAL.VEG-go-PST compl.act VEG-sea=EMPH REAL.3a.O-VEG-fetch-PST=MUT VEG.sea=TRM	It came already to the sea. The sea reached them	A3368a Side1, Chasm Island, 00:02:46.403 - 00:02:49.907	narrative
warde	kill	achievement	ATM	b	y	PFV		t				past		REDUP-V0-PST V1-PST	nen-alhə-lhəkə-nu:::wa, nenu-warda-nga yaraja	REAL3m.du-REDUP-go-PST.XTD REAL3m.du>MASC-hit-PST MASC.goanna	They kept on going (until) they killed a goanna	A3369a Side1, a3.3 Kwurrirda Kwurrirda	narrative
ngbijangə	jump	achievement	ATM	b	n	PFV		t				past		V1-PST	akena ngalh-aja ne-ngbijangə-na	and NEUT.PRO-CofR NEUT-jump-PST	and it jumped	A3369a Side 1 a3.4, Bujikeda ‘Mother cat’	narrative
lhəngaku-warbarrə	long.and.tall-split	achievement	ATM	b	y	PFV		t				past		IN-V1-PST	mu-wilyaba mamarra nəmə-lhəngaku-warbarrə-nə=ma m-akina	VEG-one VEG.small.leaved.paperbark VEG-long.and.tall-split-PST+MUT VEG-that	There was a paperbark that had fallen down	A3369a Side 1 a3.4, Bujikeda ‘Mother cat’	narrative
akuma	put	achievement	ATM	b	n	PFV		t				past		biya-XTD V1-PST	bi:::ya nuw-akuma-rna adhalyəma=manja a-kiyak-bidjina mamədhangkwa=manja	and.then.XTD REAL.NEUT>NEUT-put-PST NEUT.river=LOC NEUT-river-beside VEG.sand=LOC	Then it put the kitten down beside the river on the sand	A3369a Side 1 a3.4, Bujikeda ‘Mother cat’	narrative
ma	take	achievement	ATM	b	n	PFV		t				past		V1-PST	na-ma-nga	REAL.NEUT>NEUT-take-PST	It took another	A3369a Side 1 a3.4, Bujikeda ‘Mother cat’	narrative
rrakbi-yuwiyi-dhə	forehead-straight-INCH	achievement	ATM	b	n	IMPF		t				past		V1-PST	abukwaya na-rrakbə-rrakbi-yuwiyi-dhə-na	NEUT.that.coming REAL.NEUT-REDUP-forehead-straight-INCH-PST	it went straight on	A3369a Side 1 a3.4, Bujikeda ‘Mother cat’	narrative
ma	take	achievement	ATM	b	n	PFV		t				past		biya V1-PST	biya na-ma-nga	and.then REAL.NEUT>NEUT-take-PST	and took another	A3369a Side 1 a3.4, Bujikeda ‘Mother cat’	narrative
lhawurradhə	return	achievement	ATM	b	n	PFV		t				past		V1-PST	na-lhawurradhə-na ebina-lhangwiya ngawa	REAL.NEUT-return-PST NEUT.that.same=PERL cont.act	It came back along the same way	A3369a Side 1 a3.4, Bujikeda ‘Mother cat’	narrative
ma	take	achievement	ATM	b	n	PFV		t				past		V0-PST V1-PST	nəngu-ngwarndərra-nga na-ma-ngə=ma akina	REAL.1-not.know-PST REAL.NEUT>NEUT-take-PST=MUT NEUT.that	I didn’t see it take that one	A3369a Side 1 a3.4, Bujikeda ‘Mother cat’	narrative
warde	kill	achievement	ATM	b	y	PFV		t				past		V1-PST	yingu-warda-nga	REAL.3f>NEUT-kill-PST	she killed something	A3369a Side 1 a3.4, Bujikeda ‘Mother cat’	narrative
rreku+wurra	long.and.thin-throw.away	achievement	ATM	b	y	PFV		t				past		V1-PST	nanga-rreku+wurra-ngə=ma angerriba	REAL.FEM>FEM-long.and.thin-throw.away-PST=MUT to.there	then threw it away	A3369a Side1 a3.5, Dingarna-langwa akwa wurruwarda-langwa	narrative
lhəkə	go	achievement	ATM	b	y	PFV		t				past		V0-PST V1-PST	nəm-arəmə-dha-nə-ma arakba makarda nəmə-lhəke-nə-ma	REAL.VEG-big-INCH-PST=MUT compl.act VEG.sea VEG-go-PST=MUT	It (the sea) rose higher now, (the tide) was coming (in)	A3368a Side1, Chasm Island, 00:02:32.410 - 00:02:35.000	narrative
lhəkə	go	achievement	ATM BD DEGREE	relative	y	PFV		t				past		V1-PST	umba wurru-kwala=ba na-jungwee-yi-na	and 3a-some=EMPH REAL.3a-die-RECIP-PST	but others died	A3368a Side1, Chasm Island, 00:02:56.106 - 00:02:59.898	narrative
jungwee-yi	die-RECIP	achievement	ATM GROUP	y	n	PFV		t				past		V0-PST V1-PST	na-ridhi-yi-ne=ka nuw-abardake-yi-ne=ka	REAL.3m>MASC-chop-RECIP-PST=EMPH REAL.3a-get.plenty.of-RECIP-PST=EMPH	They chopped it and gathered lots of honey	A3369a Side1 a3.5, Dingarna-langwa akwa wurruwarda-langwa	narrative
abardake-yi	get.plenty.of; collect	achievement	ATM GROUP	b	y	IMPF		t				past		biya many-V1-PST	biya yirr-aja Friday=manja yirru-murndak-akuma-rna money shop=manja=dha	and.then 1a.pro-CofR Friday=LOC REAL.1a>NEUT-many-put-PST NEUT.money NEUT.shop=LOC=TRM	Then on Friday we all did put the money at the shop	A3370a SIDE1 a5.3 Akingambaja-langwa [=About Washing Ceremony]	narrative
akuma	put	achievement	ATM GROUP	b	n	PFV		t				past		V1-PST	kembirra arakba nen-alyubarə-na wənalhakəna=dha	then compl.act REAL.3m.du-eat-PST 3m.du.that=TRM	Then the two of them started eating	A3369a Side1, a3.3 Kwurrirda Kwurrirda	narrative
walka	sneak.up	achievement	ATM PREP	b	y	PFV		t				past	SoE CoS	V1-PST	ngayuwa nganu-walka-nə=ma y-akunə=wa yaraja	1.PRO REAL.1>MASC-sneak-PST=MUT MASC-that=ALL MASC.goanna	he snuck up on the goanna [and grabbed it by the tail]	CW, JRB1-001-01, 00.32.22-00.32.29	elicitation (translation task)
ngurrkwa	hunt	activity	BD CUM ACT	n	y	PFV		t				past	SoE CoS	V1-PST	nu-ngurrkwa-nə=ma yimendhu=wa	REAL.3m>3m-hunt-PST=MUT MASC.turtle=ALL	he was hunting turtles [all day]	ST, JRB1-001-01, 00.05.25-00.05.28	elicitation (translation task)
ngurrkwa	hunt	activity	BD CUM ACT	n	y	PFV		t				past	SoE CoS	V0-PST V1-PST	naka nenungkwarba nə-lakə-nə=ma Umbukumbu=wa nu-ngurrkwa-nə=ma yiburadha	3m.this 3m.man REAL.3m-go-PST=MUT Umbakumba=ALL REAL.3m>MASC-hunt-PST=MUT MASC.wallaby	the man went to Umbakumba to hunt wallabies	CW, JRB1-001-01, 00.14.13-00.14.20	elicitation (translation task)
laba	taste	activity	BD CUM ACT	n	y	PFV		t				past	SoE CoS	V1-PST	n-akana nə-laba-nə=ma amadangkwa	3m-that REAL.3m>NEUT-taste-PST=MUT NEUT.meat	he tasted the meat	CW, JRB1-001-01, 00.14.55-00.15.00	elicitation (translation task)
ngambe	swim; bathe	bounded activity	BD CUM ACT	n	y	PFV		t				past	SoE CoS	V-1-PST V0-PST V1-PST	yirra-lhəka-rnə=ma yirri-dirrərndi-nə=ma adalyuma=wa yirri-ngambe-nə=ma yakwujina	REAL.1a-go-PST=MUT REAL.1a-descend-PST=MUT NEUT.river=ALL REAL.1a-swim-PST=MUT there	we went down to swim at the river there	JL, JRB1-007-01, 00.00.36-00.00.41	narrative
wirrəmika	whistle	bounded activity	BD CUM ACT	n	y	PFV		t				past		V0-PST akwa V1-PST	akwa nu-wirrəmika-rnə=ma	and REAL.3m-whistle-PST=MUT	[he was singing] and [then] whistling	JL, JRB1-023-01, 00.23.48-00.23.51	elicitation (video stimuli)
errəngala	itch	bounded activity	BD CUM ACT	n	y	PFV		t				past		V-1-Ø V0-Ø akwa V1-PST	n-aka nenəngkwarba nə-ruk+wulyaka-ja-Ø=ma, nu-rək+wulyaka-ja-Ø anhənga akwa n-errəngala-ng=ma	3M-this 3M.man REAL.3M>NEUT-stir-CAUS-USP=MUT REAL.3M>NEUT-stir-CAUS-USP NEUT.food and REAL.3M-itch-PST=MUT	‘The man stirred the food and ate it and scratched himself'	CW, JRB1-023-01, 00.24.42-00.25.06	elicitation (video stimuli)
kurrudha	scratch	bounded activity	BD CUM ACT	n	y	PFV		t				past		V1-PST V2-PST V3-PST	yarrungkwa n-aka nenəngkwarba nu-kurrudha-ngu=ma ena=lhangwa arəngka akwa nə-mebi-nə-ma emeba akwa nu-wirrmika-rnu=ma	yesterday 3m-this 3m.man REAL.3m-scratch-PST=MUT 3m.PRO.POSS NEUT.head and REAL.3m-sing-PST=MUT NEUT.song and REAL.3m-whistle-PST=MUT	yesterday the man scratched his head, sung a song and whistled	JL, JRB1-024-01, 00.15.19-00.15.58	elicitation (video stimuli)
lubu	hunt	bounded activity	BD CUM ACT	n	y	PFV		t				past		V1-PST	dirnd-enikba akwa naburra-dikba neni-lubu-na yinungungwangba=wa	3f.mother-KIN.3m and 3m.son-KIN.3f REAL.3m.du>MASC-hunt-PST MASC.animal=ALL	A mother and her son went hunting for animals with their dogs	A3369a Side1, a3.3 Kwurrirda Kwurrirda	narrative
yenjala	talk.while.walking	bounded activity	BD CUM ACT	n	y	PFV		t				past		V1-PST	ni-yenjala-nga n-aka lukwakwa ngawa=dha	REAL.3m-talk.while.walking-PST 3m-this on.the.way cont.act=TRM	He kept on and on talking along the way	A3369a Side1, a3.3 Kwurrirda Kwurrirda	narrative
akwuleyi	compete; race	bounded activity	BD CUM ACT	n	y	PFV		t				past		V1-PST V2-PST	ngalh-aja dhərnd-enikba nen-akwuleyi-nə=mərra, yingi-nə-lharrma-ngə=mərra ayika=mərra	3f.PRO-CofR 3f.mother-KIN.3m REAL.3m.du-compete-PST=MUT REAL.3f-3m-chase-PST=MUT NEUT.stick=INST	His mother chased him with a stick	A3369a Side1, a3.3 Kwurrirda Kwurrirda	narrative
lharrma	chase	bounded activity	BD CUM ACT	n	y	PFV		t				past		V0-PST V1-PST	ngalh-aja dhərnd-enikba nen-akwuleyi-nə=mərra, yingi-nə-lharrma-ngə=mərra ayika=mərra	3f.PRO-CofR 3f.mother-KIN.3m REAL.3m.du-compete-PST=MUT REAL.3f-3m-chase-PST=MUT NEUT.stick=INST	His mother chased him with a stick	A3369a Side1, a3.3 Kwurrirda Kwurrirda	narrative
angkarrə	run	bounded activity	BD CUM ACT	n	y	PFV		t				past		V0-PST-XTD V1-PST	n-angkarrə-nə-mərru:::=wa, nu-kwa+bijanga-Ø ayika=manja	REAL.3M-run-PST=MUT.XTD=PL REAL.3M-jump-USP NEUT.tree=LOC	He kept on running (until) he jumped behind a tree	A3369a Side1, a3.3 Kwurrirda Kwurrirda	narrative
dhərrərndhə	descend	bounded activity	BD CUM ACT	n	y	PFV		t				past		REDUP-V1-PST-XTD V2-PST	nen-alhə-lhəkə-nu:::wa, neni-dhərrərndhə-nga, adhalyuma=manja	REAL.3m.du-REDUP-go-PST.XTD REAL.3m.du-descend-PST NEUT.river=LOC	The two of them kept on walking (until) they got down to the river	A3369a Side1, a3.3 Kwurrirda Kwurrirda	narrative
lhəkə	go	bounded activity	BD CUM ACT	n	y	PFV		t				past		REDUP-V0-PST-XTD V1-PST	nen-alhə-lhəkə-nu:::wa, neni-dhərrərndhə-nga, adhalyuma=manja	REAL.3m.du-REDUP-go-PST.XTD REAL.3m.du-descend-PST NEUT.river=LOC	The two of them kept on walking (until) they got down to the river	A3369a Side1, a3.3 Kwurrirda Kwurrirda	narrative
embərrari	wait	bounded activity	BD CUM ACT	n	y	PFV		t				past		V1-PST	en-eja n-akəna nabərra-dhikba ngawa n-embərrari-nə=ma	3m.PRO-CofR 3m-that 3m.son-KIN.3f cont.act REAL.3m-wait-PST=MUT	Her son kept on waiting [until it was cooked]	A3369a Side1, a3.3 Kwurrirda Kwurrirda	narrative
mebi	sing	bounded activity	BD CUM ACT	n	y	PFV		t				past		REDUP-V1-PST-XTD	n-akəna nə-mebə-mebi-nə=mərra ngawa	3m-that REAL.3m-REDUP-sing-PST=MUT cont.act		A3369a Side1, a3.3 Kwurrirda Kwurrirda	narrative
ngwadhə	cry	bounded activity	BD CUM ACT	n	y	PFV		t				past		V0-PST V1-PST	nə-ngwadhə-na kemba nə-ngwadhə-na n-ibəna ngawa arakba	REAL.3m-cry-PST then 3m-cry-PST 3m-this cont.act compl.act	He started crying. And he kept on crying	A3369a Side1, a3.3 Kwurrirda Kwurrirda	narrative
akadha	make.own.sound	bounded activity	BD CUM ACT	n	y	PFV		t				past		V1-PST	erribabe=ka nuw-akadha-ngee=ka enəng-angk-awura	to.here=EMPH REAL.NEUT-make.own.sound-PST=EMPH NEUT.ALP-times-alone	It kept on crackling towards us all the time	A3369a Side 1 a3.4, Bujikeda ‘Mother cat’	narrative
akurraju	look.after	bounded activity	BD CUM ACT	n	y	PFV		t				past		V1-PST	nuw-akurraju-wa a-bə-bərra-dha=dha	REAL.NEUT>NEUT-look.after-PST NEUT-RDP-offspring-3f.KIN=EMPH	it looked after them	A3369a Side 1 a3.4, Bujikeda ‘Mother cat’	narrative
lhəke	go	bounded activity	BD CUM ACT	n	y	PFV		t				past		REDUP-V1-PST V2-PST	n-alhə-lhəke-ne=ka n-akənu:::wa, nu-murndaku-warda-nga	REAL.3m-REDUP-go-PST=EMPH 3m-that.XTD REAL.3m>MASC-many-kill-PST	He kept on walking (until he found) some animals and killed them	A3369a Side1 a3.5, Dingarna-langwa akwa wurruwarda-langwa	narrative
anjirrike-yi	hurry-RECIP	bounded activity	BD CUM ACT	n	y	PFV		t				past		V1-PST V2-PST	arakba ying-anjirrike-yi-na ying-angkarrə-na	compl.act REAL.FEM-hurry-RECIP-PST FEM-run-PST	So she hurried and ran fast	A3369a Side1 a3.5, Dingarna-langwa akwa wurruwarda-langwa	narrative
angkarrə	run	bounded activity	BD CUM ACT	n	y	PFV		t				past		V0-PST V1-PST	arakba ying-anjirrike-yi-na ying-angkarrə-na	compl.act REAL.FEM-hurry-RECIP-PST FEM-run-PST	So she hurried and ran fast	A3369a Side1 a3.5, Dingarna-langwa akwa wurruwarda-langwa	narrative
akadha	bark	bounded activity	BD CUM ACT	n	y	PFV		t				past		V1-PST	ying-akadha-ngə=mərra	REAL.FEM-bark-PST=MUT	She barked	A3369a Side1 a3.5, Dingarna-langwa akwa wurruwarda-langwa	narrative
be-yi	argue-RECIP	bounded activity	BD CUM ACT	n	y	PFV		t				past		V1-PST	adinuba=wiya wurring-alakina Wakaba akwa Dangmiyala narringi-be-yi-na	soon=QUANT 3fdu-those.two Wakaba and Dangmiyala REAL.3fdu-argue-RECIP-PST	At first Wakaba and Dangmiyala had an argument	A3370a SIDE1 a5.3 Akingambaja-langwa [=About Washing Ceremony]	narrative
engkingkirre	think	bounded activity	BD CUM ACT	n	y	PFV		t				past		V1-PST	ying-engkingkirre-na	REAL.3f-think-PST	Then (Wakaba) kept on thinking	A3370a SIDE1 a5.3 Akingambaja-langwa [=About Washing Ceremony]	narrative
lyuwaka	spin	bounded activity	BD CUM ACT	n	y	PFV		t				past		V1-PST	yarna yirre-nu-wurraki-lyuwaka-ju-wa-ma yarnumamalya	1a.this REAL.1a-3m-many-spin-CAUS-PST=MUT 1a.people	then he went all around us	A3370a SIDE1 a5.3 Akingambaja-langwa [=About Washing Ceremony]	narrative
ngwarndərra	not.know	state	BD CUM State NEG	n	n	PFV		t				past		V1-PST V2-PST	nəngu-ngwarndərra-nga na-ma-ngə=ma akina	REAL.1-not.know-PST REAL.NEUT>NEUT-take-PST=MUT NEUT.that	I didn’t see it take that one	A3369a Side 1 a3.4, Bujikeda ‘Mother cat’	narrative
lhəkə	go	bounded activity	BD PLUR ACT	closed	y	PFV		t				past		REDUP-V1-PST V2-PST	nen-alhə-lhəkə-nu:::wa, nenu-warda-nga yaraja	REAL3m.du-REDUP-go-PST.XTD REAL3m.du>MASC-hit-PST MASC.goanna	They kept on going (until) they killed a goanna	A3369a Side1, a3.3 Kwurrirda Kwurrirda	narrative
abardake-yi	get.plenty.of; collect	bounded activity	BD PLUR ACT	n	y	PFV		t				past		V1-PST	yiningerribirre=ka yinungungwangba nen-abardake-yi-na	MASC.any.kind=ka MASC.animal REAL.3m.du-get.plenty.of-RECIP-PST	They got lots of animals of all kinds	A3369a Side1, a3.3 Kwurrirda Kwurrirda	narrative
warde	hit	bounded iterated achievement	BD PLUR ACT	dna	y	PFV		t				past		biya V1-PST	biya yingənə-warda-nga ambaka ayika=mərra	and.then REAL.3f>3m-hit-PST then NEUT.stick=INST NEUT.stick	Then she gave him a hiding with a stick	A3369a Side1, a3.3 Kwurrirda Kwurrirda	narrative
mebi	sing	activity	CUM ACT UBD	n	y	IMPF		t				past		V0-PST V1-PST V2-PST	yarrungkwa n-aka nenəngkwarba nu-kurrudha-ngu=ma ena=lhangwa arəngka akwa nə-mebi-nə-ma emeba akwa nu-wirrmika-rnu=ma	yesterday 3m-this 3m.man REAL.3m-scratch-PST=MUT 3m.PRO.POSS NEUT.head and REAL.3m-sing-PST=MUT NEUT.song and REAL.3m-whistle-PST=MUT		JL, JRB1-024-01, 00.15.19-00.15.58	elicitation (video stimuli)
wirrmika	whistle	activity	CUM ACT UBD	n	y	IMPF		t				past		V-1-PST V0-PST V1-PST	yarrungkwa n-aka nenəngkwarba nu-kurrudha-ngu=ma ena=lhangwa arəngka akwa nə-mebi-nə-ma emeba akwa nu-wirrmika-rnu=ma	yesterday 3m-this 3m.man REAL.3m-scratch-PST=MUT 3m.PRO.POSS NEUT.head and REAL.3m-sing-PST=MUT NEUT.song and REAL.3m-whistle-PST=MUT		JL, JRB1-024-01, 00.15.19-00.15.58	elicitation (video stimuli)
angkarrə	run	activity	CUM ACT UBD	n	y	IMPF		t				past		V1-PST	n-angkarrə-nə=m yeya	REAL.3m-run-PST=MUT MASC.footstep	he was running	JL, JRB1-024-01, 00.18.26-00.18.28	elicitation (video stimuli)
emburrarə	wait	activity	CUM ACT UBD	n	y	IMPF		t				past		V1-PST	yarrungkwa n-akəna nenəngkwarba n-emburrarə-nə=ma n-akinə=wa nu-wilyaba nenəngkwarba	yesterday 3m-that 3m.man REAL.3m-wait-PST=MUT 3m-that=ALL 3m-one 3m.man	yesterday the man was waiting for the other man	JL, JRB1-024-01, 00.14.46-15.42	elicitation (video stimuli)
ngk-arranga	half-cut	activity	CUM ACT UBD	n	y	IMPF		t				past		V1-PST NEG IRR-V2-PST	yarrungkwa n-aka nenəngkwarba ni-ngk-arranga-rnu=ma ayika akena nara ka-kw+arri-na	yesterday 3m-this 3m.man REAL.3m>NEUT-half-cut-PST=MUT NEUT.tree but NEG IRR.3m>NEUT-half+break-PST	yesterday the man was cutting the branch, but it didn't break	JL, JRB1-029-01, 00.06.23-00.06.35	elicitation (video stimuli)
lyelyimbukwe-yi	discuss-RECIP	activity	CUM ACT UBD	n	y	IMPF		t				past		V1-PST	na-lyelyimbukwe-yi-na abərrəwa w-arniniyerringka=wiya=dha	REAL.3a-discuss-RECP-PST 3a.PRO 3a.old.man=QUANT=EMPH	They were talking old people to each other	A3368a Side1, Chasm Island, 00:00:38.705 - 00:00:41.765	narrative
mədheeyi	paddle	activity	CUM ACT UBD	n	y	IMPF		t				past	Background	V0-PST V1-PST	biya na-lhəka-rna arakba wurr-akina na-mədheeyi-na libaliba=ma=dha	and REAL.3a-go-PST compl.act 3a-that REAL.3a-paddle-PST VEG.canoe=INST=EMPH	and they went off, paddling their canoes	A3368a Side1, Chasm Island, 00:00:57.960 - 00:01:00.530	narrative
engkərre	listen; hear	bounded activity	BD CUM ACT	n	y	PFV		t				past		V1-PST	nuw-engk-ingkərre-nu:::wa	REAL.3a-REDUP-hear-PST:::XTD	They kept on listening	A3368a Side1, Chasm Island, 00:02:15.875 - 00:02:18.950	narrative
andaka	hunt	activity	CUM ACT UBD	n	y	IMPF		t				past	Overlap	V1-PST	n-andaka-rnə-ma	REAL.3m>NEUT-hunt-PST=MUT	he was hunting [with a spear]	ST, JRB1-001-01, 00.00.37-00.00.39	elicitation (translation task)
mənandabe	wonder	activity	CUM ACT UBD	n	y	IMPF		t				past		V1-RECIP-PST V2-PST	yirri-mənandabe-yi-nə=ma mena ena akungkwa ne-yukwaja-dhə-nə=ma	REAL.1a-wonder-RECIP-PST=MUT because NEUT.this NEUT.water REAL.NEUT-small-INCH-PST=MUT	we were wondering about this river getting shallow	JL, JRB1-007-01, 00.01.49-00.01.58	narrative
mebi	sing	activity	CUM ACT UBD	n	y	IMPF		t				past		V1-PST	yarrungkwa n-akəna nenəngkwarba nə-mebi-nə=ma emeba	yesterday 3m-that 3m.man REAL.3m-sing-PST=MUT NEUT.song	yesterday the man was singing	JL, JRB1-023-01, 00.07.50-00.07.58	elicitation (video stimuli)
angkarrə	blow; run	activity	CUM ACT UBD	n	n	IMPF		t				past		V1-PST	əmba en-eja n-akwukawura nə-malyumalyangkə-nə=ma n-akəna=dha	but 3f.PRO-CofR 3m-alone REAL.3m-play-PST=MUT 3m-that=TRM	[She kept on sleeping,] but the little boy played all by himself	A3369a Side1, a3.3 Kwurrirda Kwurrirda	narrative
arəmbənadhə	spread	activity	CUM ACT UBD	n	n	IMPF		t				past		V1-PST	m-adhərrungwarnee=ka mamarika nəm-angkarrə-na	VEG-big=EMPH VEG.southeast.wind REAL.VEG-run-PST	A big southeast wind was blowing	A3369a Side 1 a3.4, Bujikeda ‘Mother cat’	narrative
ngurrkwe	hunt	activity	CUM ACT UBD	n	y	IMPF		t				past		V1-PST	ngalhajee=ka angura adhərrungwarnee=ka nuw-arəmbənadhə-na	NEUT.PRO=EMPH NEUT.fire NEUT.big=EMPH REAL.NEUT-spread-PST		A3369a Side 1 a3.4, Bujikeda ‘Mother cat’	narrative
arda	call	activity	CUM ACT UBD	n	y	IMPF		t				past		V1-PST	akena dhə-rnd-arringba dhukwee=ka awilyikerra yingu-ngurrkwe-nə=ma akwalyu=wa=dha	but 3f-mother-3a.KIN maybe=EMPH a.long.way.off REAL.3f-hunt-PST=MUT NEUT.meat=ALL=TRM	Maybe the mother had been hunting a long way for meat	A3369a Side 1 a3.4, Bujikeda ‘Mother cat’	narrative
malyumalyangkə	play	activity	CUM ACT UBD	n	y	IMPF		t				past		kembirra V1-PST	kembirra nuw-arda-ngu=ma dhərnd-arringbu=wa	then REAL.COLL-call.out-PST=MUT 3f.mother-KIN.3a=ALL	that little one was calling out to its mother	A3369a Side1 a3.5, Dingarna-langwa akwa wurruwarda-langwa	narrative
akudhangu-dhə	become.near	scalar achievement	CUM CoS Scal UBD	open	n	IMPFV		t				past		V1-PST=TRM	ngalh-aja angura abukwaya nuw-akudhangu-dhə-nə=dha	NEUT.PRO-CofR NEUT.fire NEUT.coming NEUT-near-INCH-PST=TRM	The fire was coming closer	A3369a Side 1 a3.4, Bujikeda ‘Mother cat’	narrative
alyubarə	eat	scalar achievement	CUM CoS Scal UBD	open	y	IMPF		t				past		V1-PST	ambaka+lhangwa na-mənəngka-dhə-nə=ma ena angalya	slowly REAL.NEUT-different-INCH-PST=MUT NEUT.this NEUT.place	slowly this place seems to get different	JL, JRB1-007-01, 00.01.29-00.01.34	narrative
warriya-dhə	be.sad	state	CUM STATE UBD	dna	n	IMPF		t				past		NI-V1-PST	n-aka nenəngkwarba nu-werrku+warriya-dhə-nə=ma	3m-this 3m.man REAL.3m-chest+sad-INCH-PST=MUT	the man was feeling sad	JL, JRB1-022-01, 00.02.34-00.02.36	elicitation (video stimuli)
ngwədhangma	be.open	state	CUM STATE UBD	n	n	IMPF		t				past		V1-PST	akəna door=a na-ngwədhangmə-nə=ma	NEUT.that NEUT.door=PF REAL.NEUT-be.open-PST=MUT	the door was open	JL, JRB1-022-01, 00.01.24-00.01.29	elicitation (video stimuli)
iki-lyangbadhə	tree-go.across	state	CUM STATE UBD	n	n	IMPF		t				past		IN-V1-PST	nəm-iki-lyangbadhə-nga=ma adhalyəma=manja	REAL.VEG-tree-go.across-PST=MUT NEUT.river=LOC	it (the tree) was lying across the river	A3369a Side 1 a3.4, Bujikeda ‘Mother cat’	narrative
errukulhə	be.sorry	state	CUM STATE UBD	n	y	IMPF?		t				past		V1-PST	ngayuwee=ka nəng-errukulhə-nə-mee=ka	1.PRO=EMPH REAL.1-be.sorry-PST=MUT=EMPH	I felt sorry for her	A3369a Side 1 a3.4, Bujikeda ‘Mother cat’	narrative
alharə-dhə	burnt.off.bush-INCH	state	CUM STATE UBD	b	n	IMPFV		t				past		V1-PST	ne-kalharə-dhə-na erribaba	REAL.NEUT-burnt.off.bush-INCH-PST to.here	It burnt towards us	A3369a Side 1 a3.4, Bujikeda ‘Mother cat’	narrative
ajirra	wash	Hab Activity	CUMT STATE HAB ACT	n	n	IMPF		t				past	Overlap	V1-PST RED-V2-Ø	narrəma-mərndak-ajirra-ngə=ma dhəmbalha-mərriya narrəma-mərndak-ara-rurrmaja-Ø=ma karrawara amarda-mirriya=manja	REAL.3A>VEG-many-wash-PST=MUT VEG.clothes-the.rest REAL.3A>VEG-many-REDUP-dry-USP=MUT above NEUT.grass-the.rest=LOC	[we used to watch older women at the river] wash their clothes and dry [them] on dry grasses	JL, JRB1-007-01, 00.00.51-00.01.08	narrative
ngurrkwa	hunt	Hab Activity	CUMT STATE HAB ACT	n	y	IMPF		t				past	Overlap	V1-PST	ngayuwa ngə-ngurrukwa-nə-ma dhənungkwulangwa	1.PRO REAL.1>FEM-hunt-PST=MUT FEM.dugong	I used to hunt dugong [when I was young]	CW, JRB1-001-01, 00.07.13-00.07.16	elicitation (translation task)
mənəngka-dhə	become.different	CoS	INCH ATM	b	n	IMPF		t				past		V0-RECIP-PST V1-PST	yirri-mənandabe-yi-nə=ma mena ena akungkwa ne-yukwaja-dhə-nə=ma	REAL.1a-wonder-RECIP-PST=MUT because NEUT.this NEUT.water REAL.NEUT-small-INCH-PST=MUT	we were wondering about this river getting shallow	JL, JRB1-007-01, 00.01.49-00.01.58	narrative
yukwaja-dhə	become.shallow; become.small	CoS	INCH ATM	n	n	IMPF		t				past		V1-PST V2-PST	nəm-arəmə-dha-nə-ma arakba makarda nəmə-lhəke-nə-ma	REAL.VEG-big-INCH-PST=MUT compl.act VEG.sea VEG-go-PST=MUT	It (the sea) rose higher now, (the tide) was coming (in)	A3368a Side1, Chasm Island, 00:02:32.410 - 00:02:35.000	narrative
arəmə-dha	get.big; rise	CoS	INCH ATM	b	n	PFV		t				past		V1-PST	akwa nəmə-yalkwudi-na arakba m-akina makarda	and REAL.VEG-become.low.tide-PST compl.act VEG-that VEG.sea	and the tide went out	A3368a Side1, Chasm Island, 00:03:17.506 - 00:03:19.697	narrative
yalkwudi	become.low.tide	CoS	INCH ATM	b	n	PFV		t				past		V1-PST V2-PST	nə-ngwadhə-na kemba nə-ngwadhə-na n-ibəna ngawa arakba	REAL.3m-cry-PST then 3m-cry-PST 3m-this cont.act compl.act	He started crying. And he kept on crying	A3369a Side1, a3.3 Kwurrirda Kwurrirda	narrative
ngwadhə	cry	inchoative activity	INCH ATM	b	y	IMPF		t				past		V1-PST arakba	nə-ridha-nga arakba yilyakwa n-akəna=dha	REAL.3m>MASC-chop-PST compl.act MASC.sugarbag 3m-that=TRM	Then he started chopping the sugarbag	A3369a Side1 a3.5, Dingarna-langwa akwa wurruwarda-langwa	narrative
ridha	chop	inchoative pluractional	INCH ATM PLUR	n	y	IMPF		t				past		V0-Ø akwa V1-PST	akəna door=a na-ngwudhangma-Ø akwa na-dhəka-jungu-nə=ma	NEUT.that NEUT.door REAL.NEUT-be.open-USP and REAL.NEUT-be.closed-REFL-PST=MUT	‘the door is open, and then it got shut’	JL, JRB1-023-01, 00.01.54-00.02.02	elicitation (video stimuli)
dhəka-jungu	be.closed-REFL	inchoative state	INCH ATM STATE	dna	n	PFV		t				past		V1-PST	na-rukwu-lyəke-na m-akina makarda	REAL.3a-body-spin-PST VEG-that VEG.sea	spinning around in the sea	A3368a Side1, Chasm Island, 00:01:33.130 - 00:01:35.290	narrative
rukwu+lyake	go.around	activity	PLUR ACT UBD	n	n	IMPF		t				past		V1-PST	nu-kwurridhi-jungu-nə-ma	REAL.3m-scratch-REFL-PST=MUT	he was scratching himself	JL, JRB1-023-01, 00.26.52-00.27.02	elicitation (video stimuli)
kwurridhi-jungu	scratch	activity	PLUR ACT UBD	n	y	IMPF?		t				past		V1-PST	yarrungkwa n-akəna nəjarrngalya nenu-warda-ngə=ma mardawa-mirriya	yesterday 3m-that 3m.boy REAL.3m>VEG?-kill-PST=MUT VEG.red.ant-the.rest	the boy was killing the ants	JL, JRB1-018-01, 00.23.37-00.23.51	elicitation (translation task)
warde	kill	iterated achievement or hab achievement	PLUR UBD ACH or HAB ACH	dna	n	IMPF		t				past		V1-PST	yarrungkwa ngayuwa nəngə-bekə-nə=ma tea=a	yesterday 1.PRO REAL.1-drink-PST=MUT NEUT.tea=PF	yesterday I drank the tea	JL, JRB1-023-01, 00.13.00-00.13.06	elicitation (video stimuli)
bekə	drink	accomplishment	Q INCR	n	y	PFV?		t				past		akwa V0-∅ arakba V1-PST	akwa n-angkarra-Ø arakba nu-wurda-nga angwarnda=manja abalkaya=dha	and REAL.3M-run-USP COMPL.ACT REAL.3M-climb-PST NEUT.stone=LOC above=TRM	‘And he ran off (and) climbed high on the rocks’	A3368a Side1, Chasm Island, 00:01:38.930-00:01:43.290	narrative
wurda	climb	accomplishment	Q INCR	n	y	PFV		t				past		V1-PST	angurrkwurrikba-wa angerriba angwarnda na-wurdi-yi-na	salt.lake-ALL to.over.there NEUT.stone REAL.3a-climb-RECIP-PST	they climbed the rocks over there near Angurrkwurrikba (Salt Lake)	A3368a Side1, Chasm Island, 00:03:06.311 - 00:03:10.052	narrative
wurda	climb	accomplishment	Q INCR	n	y	PFV		t				past		V1-PST	nenə-lingkarrnga-rna yaraja	REAL.3m.du>MASC-dig-PST MASC.goanna	They dug up a goanna	A3369a Side1, a3.3 Kwurrirda Kwurrirda	narrative
lingkarrnga	dig	accomplishment	Q INCR	n	y	PFV		t				past		V1-PST V2-PST	na-ridhi-yi-ne=ka nuw-abardake-yi-ne=ka	REAL.3m>MASC-chop-RECIP-PST=EMPH REAL.3a-get.plenty.of-RECIP-PST=EMPH	They chopped it and gathered lots of honey	A3369a Side1 a3.5, Dingarna-langwa akwa wurruwarda-langwa	narrative
ridhi	chop	accomplishment	Q INCR	closed	y	PFV		t				past		REDUP-V0-PST V1-PST	n-alhə-lhəke-ne=ka n-akənu:::wa, nu-murndaku-warda-nga	REAL.3m-REDUP-go-PST=EMPH 3m-that.XTD REAL.3m>MASC-many-kill-PST	He kept on walking (until he found) some animals and killed them	A3369a Side1 a3.5, Dingarna-langwa akwa wurruwarda-langwa	narrative
warda	kill	accomplishment	Q INCR	closed	y	PFV		t				past		V1-PST V2-PST	biya na-lhəka-rna arakba wurr-akina na-mədheeyi-na libaliba=ma=dha	and REAL.3a-go-PST compl.act 3a-that REAL.3a-paddle-PST VEG.canoe=INST=EMPH	and they went off, paddling their canoes	A3368a Side1, Chasm Island, 00:00:57.960 - 00:01:00.530	narrative
walka	sneak.up	activity	CUM ACT UBD	b	y	IMPF	t					present		V1-NPST	nanu-walka-ja-ma nanəngkamjenikbu=wa	REAL.3m>3m-sneak.up-NPST=MUT 3m.younger.brother=ALL	he's sneaking to his brother	CW, JRB1-001-01, 00.23.36-00.24.43	elicitation (translation task)
lalawayi-ji	stretch.out	activity	CUM ACT UBD	n	y	IMPF	t					present		V1-NPST	nə-lalawayi-ji-na=ma ena=lhangwa ayerrka	REAL.3m-stretch.out-CAUS-NPST=MUT 3m.PRO=POSS NEUT.hand	he stretches out his hand	JL, JRB1-022-01, 00.15.41-15.50	elicitation (video stimuli)
mebi	sing	activity	CUM ACT UBD	n	y	IMPF	t					present		V1-NPST	n-aka nenəngkwarba nə-mebi-na=ma	3m-this 3m.man REAL.3m-sing-NPST=MUT	the man is singing	JL, JRB1-023-01, 00.07.20-00.07.26	elicitation (video stimuli)
arrkərre	draw	activity	CUM ACT UBD	n	y	IMPF	t					present		V1-NPST akwa V2-NPST akwa V3-NPST	n-aka nenəngkwarba n-arrkərre-na-ma mamudang=manja akwa n-arrangali-jungu-na=ma akwa nə-mebi-na=ma	3m.this 3m.man REAL.3m-write-NPST=MUT VEG.sand=LOC and REAL.3m-scratch-REFL-NPST=MUT and REAL.3m-sing-NPST=MUT	the man is drawing on the sand and scratching himself and singing	JL, JRB1-023-01, 00.34.36-00.00.35.06	elicitation (video stimuli)
mebi	sing	activity	CUM ACT UBD	n	y	IMPF	t					present		V-1-NPST akwa V0-NPST akwa V1-NPST	n-aka nenəngkwarba n-arrkərre-na-ma mamudang=manja akwa n-arrangali-jungu-na=ma akwa nə-mebi-na=ma	3m.this 3m.man REAL.3m-write-NPST=MUT VEG.sand=LOC and REAL.3m-scratch-REFL-NPST=MUT and REAL.3m-sing-NPST=MUT	the man is drawing on the sand and scratching himself and singing	JL, JRB1-023-01, 00.34.36-00.00.35.06	elicitation (video stimuli)
larrukwa	taste; try	activity	CUM ACT UBD	n	y	IMPF	t					present		V1-NPST	nə-larrukwa-ja	REAL.3m-taste-NPST	he's tasting [it]	CW, JRB1-001-01, 00.20.58-00.21.03	elicitation (translation task)
bekə	drink	activity	CUM ACT UBD	n	y	IMPF	t					present		V1-NPST	n-aka nenəngkwarba ni-bekə-na=ma	3m-this 3m.man REAL.3m-drink-NPST=MUT	the man is drinking	CW, JRB1-023-01, 00.11.40-00.11.46	elicitation (video stimuli)
ngurrkwa	hunt	state hab activity	CUM STATE HAB ACT	n	y	IMPF	t					present		V1-NPST	nu-ngurrkwa-ja=ma yimendhu=wa	REAL.3m>3m-hunt-NPST=MUT MASC.turtle=ALL	he hunts turtles	ST, JRB1-001-01, 00.01.31-00.01.33	elicitation (translation task)
ngurrkwa	hunt	state hab activity	CUM STATE HAB ACT	n	y	IMPF	t					present		V1-NPST	n-aka nanungkwarba enungkwa=ma nu-ngurrkwa-ja=ma	3m-this 3m.man NEUT.spear=INST REAL.3m>NEUT-hunt-PST=MUT	this man hunts with a spear	ST, JRB1-001-01, 00.01.04-00.01.08	elicitation (translation task)
yuwee-yi	follow-RECIP	state modal	CUM STATE UBD	n	y	IMPF	t					present		V1-NPST akwa V2-NPST	yirrə-yuwee-yi-na abalkaya ngarri-lhəka-ja	REAL.13a-follow-RECP-NPST above REAL.12a-go-NPST	let's follow, let's go up high	A3368a Side1, Chasm Island, 00:01:59.705 - 00:02:02.475	narrative
lhəkə	go	state modal	CUM STATE UBD	n	y	IMPF	t					present		V1-NPST V2-NPST	ngə-lhəka-ja=ma ngə-ngurrkwa-ja=ma yimendhu=wa	REAL.1-go-NPST=MUT REAL.1>MASC.hunt-NPST=MUT MASC.turtle=ALL	I am going to hunt turtle	ST, JRB1-001-01, 00.03.13-00.03.17	elicitation (translation task)
ngurrkwa	hunt	state modal	CUM STATE UBD	n	y	IMPF	t					present		V0-NPST V1-NPST	ngə-lhəka-ja=ma ngə-ngurrkwa-ja=ma yimendhu=wa	REAL.1-go-NPST=MUT REAL.1>MASC.hunt-NPST=MUT MASC.turtle=ALL	I am going to hunt turtle	ST, JRB1-001-01, 00.03.13-00.03.17	elicitation (translation task)
lhəkə	go	state modal	CUM STATE UBD	n	y	IMPF	t					present		V1-NPST	ngayuwa ngə-ləka-ja=ma akwalyu=wa	1.PRO REAL.1-go-NPST=MUT NEUT.fish=ALL	I'm going fishing	ST, JRB1-001-01, 00.08.36-00.08.39	elicitation (translation task)
ngwanja-jə	stop	state modal	CUM STATE UBD	n	n	IMPF	t					present		V1-PST	ngumu-ngwanja-jə-na=ma duraka	REAL.1>VEG-stop-CAUS-NPST=MUT VEG.car	I'm stopping the car	JL, JRB1-018-01, 00.15.37-00.15.42	elicitation (translation task)
lhəkə	go	state modal	CUM STATE UBD	n	y	IMPF	t					present		V1-NPST V1-NPST V2-NPST	arakba ngarrə-lhəka-ja ngarna ngarrə-lhəka-ja=ma ngarrə-m-ardhərre-na=ma makarda m-akina	compl.act REAL.12a-go-NPST 12a.that REAL.12a-go-NPST=MUT REAL.12a-VEG-spear-NPST=MUT VEG.sea VEG-that	we are going now (let's go), we going to hit (spear) that sea (and spear the sea)	A3368a Side1, Chasm Island, 00:00:42.645 - 00:00:51.160	narrative
adhərrə	spear; pierce	state modal	CUM STATE UBD	n	y	IMPF	t					present		V0-NPST V0-NPST V1-NPST	arakba ngarrə-lhəka-ja ngarna ngarrə-lhəka-ja=ma ngarrə-m-ardhərre-na=ma makarda m-akina	compl.act REAL.12a-go-NPST 12a.that REAL.12a-go-NPST=MUT REAL.12a-VEG-spear-NPST=MUT VEG.sea VEG-that	we are going now (let's go), we going to hit (spear) that sea (and spear the sea)	A3368a Side1, Chasm Island, 00:00:42.645 - 00:00:51.160	narrative
lhəkə	go	state modal	CUM STATE UBD	n	y	IMPF	t					present		V0-NPST akwa V1-NPST	yirrə-yuwee-yi-na abalkaya ngarri-lhəka-ja	REAL.13a-follow-RECP-NPST above REAL.12a-go-NPST	let's follow, let's go up high	A3368a Side1, Chasm Island, 00:01:59.705 - 00:02:02.475	narrative
mudilyakbə	cough	semelfactive iterative	PLU SEM UBD	dna	n	IMPF	t					present		V1-NPST	n-akəna nenəngkwarba nə-mudilyakbə-na=ma	3m-that 3m.man REAL.3m-cough-NPST=MUT	the man is coughing	JL, JRB1-023-01, 00.08.30-00.08.34	elicitation (video stimuli)
rukwu+lyake	go.around	activity	PLUR ACT UBD	n	n	IMPF	t					present		V1-NPST	dh-aka fan yingu-rukwu+lyake-na=ma	FEM.that FEM.fan REAL.FEM-go.around-NPST=MUT	the fan spins around	JL, JRB1-023-01, 00.10.50-00.10.58	elicitation (video stimuli)
lyangk-wama-jə	blink	semelfactive iterative	PLUR SEM ATM UBD	b	y	IMPF	t					present		V1-NPST	nungkwa nungku-ma-lyangk-wama-jə-na=ma memba	2.PRO REAL.2-VEG-head+nod-CAUS-NPST=MUT VEG.eye	you're blinking your eye	JL, JRB1-023-01, 00.14.58-00.15.04	elicitation (video stimuli)
ekekirrarji	come.and.go	semelfactive iterative	PLUR SEM ATM UBD	n	y	IMPF	t					present		V1-NPST	nuw-ekekirrarji-na=ma warenja=ba=wiya=baba	REAL.NEUT-come.and.go-NPST=MUT quickly-EMPH=QUANT=REAS	because it's coming and going so quickly	A3369a Side 1 a3.4, Bujikeda ‘Mother cat’	narrative
errəngala-jungu	itch	iterated semelfactive	PLUR SEM UBD	n	y	IMPF	t					present		V0-NPST akwa V1-NPST akwa V2-NPST	n-aka nenəngkwarba n-arrkərre-na-ma mamudang=manja akwa n-arrangali-jungu-na=ma akwa nə-mebi-na=ma	3m.this 3m.man REAL.3m-write-NPST=MUT VEG.sand=LOC and REAL.3m-scratch-REFL-NPST=MUT and REAL.3m-sing-NPST=MUT	the man is drawing on the sand and scratching himself and singing	JL, JRB1-023-01, 00.34.36-00.00.35.06	elicitation (video stimuli)

## Sheet: All PST
adhərrə	spear; pierce	achievement	ATM	b	y	PFV		t				past	SoE CoS	V1-PST	ngayuwa ngən-adhərra-ng=ma yiburadha	1.PRO REAL.1>MASC-spear-PST=MUT MASC.wallaby	I speared the wallaby	ST, JRB1-001-01, 00.06.09-00.06.15	elicitation (translation task)
lhəkə	go	achievement	ATM	b	y	PFV		t				past	SoE CoS	V1-PST V2-PST	naka nenungkwarba nə-lakə-nə=ma Umbukumbu=wa nu-ngurrkwa-nə=ma yiburadha	3m.this 3m.man REAL.3m-go-PST=MUT Umbakumba=ALL REAL.3m>MASC-hunt-PST=MUT MASC.wallaby	the man went to Umbakumba to hunt wallabies	CW, JRB1-001-01, 00.14.13-00.14.20	elicitation (translation task)
lhəka	go	achievement	ATM	b	y	PFV		t				past	SoE CoS	V1-PST V2-PST V3-PST	yirra-lhəka-rnə=ma yirri-dirrərndi-nə=ma adalyuma=wa yirri-ngambe-nə=ma yakwujina	REAL.1a-go-PST=MUT REAL.1a-descend-PST=MUT NEUT.river=ALL REAL.1a-swim-PST=MUT there	we went down to swim at the river there	JL, JRB1-007-01, 00.00.36-00.00.41	narrative
dhərrərndhə	descend	achievement	ATM	b	y	PFV		t				past	SoE CoS	V0-PST V1-PST V2-PST	yirra-lhəka-rnə=ma yirri-dhərrərndhə-nə=ma adalyuma=wa yirri-ngambe-nə=ma yakwujina	REAL.1a-go-PST=MUT REAL.1a-descend-PST=MUT NEUT.river=ALL REAL.1a-swim-PST=MUT there	we went down to swim at the river there	JL, JRB1-007-01, 00.00.36-00.00.41	narrative
lhəka	go	achievement	ATM	closed	y	PFV		t				past		V1-PST	akwala+manja wurra-daduyuwangkwa na-lhəka-nə=ma adalyuma=wa	sometimes 3a-old.woman REAL.3a-go-PST=MUT NEUT.river=ALL	sometimes old women also went to the river	JL, JRB1-007-01, 00.00.42-00.00.51	narrative
lhəka	go	achievement	ATM	closed	y	IMPF		t				past		V1-PST=LOC	kemba mining.company na-lhəka-nə=manja arakba yangkwurrangwa	then mining.company 3a-go-PST=LOC compl.act to.here	then when BHP came here	JL, JRB1-007-01, 00.01.15-00.01.20	narrative
lhawurradhə	return	achievement	ATM	b	y	PFV		t				past		V1-PST	biya wurr-ukwala na-lhawurradhə-na	and.then 3a-some REAL.3a-return-PST	[a few of the missionaries stayed here] while others left	JL, JRB1-007-01, 00.01.20-00.01.27	narrative
yadha	arrive	achievement	ATM	b	n	PFV		t				past		V1-PST	n-akən nenəngkwarba ni-yadha-ngə=ma Numbulwar	3m-that 3m.man REAL.3m-arrive-PST=MUT Numbulwar	the man arrived in Numbulwar	JL, JRB1-018-01, 00.02.28-00.02.24	elicitation (translation task)
yadha	arrive	achievement	ATM	b	n	PFV		t				past		V1-PST	ni-yadha-ngə-ma Numbulwar arakba	REAL.3m-arrive-PST=MUT Numbulwar compl.act	he's already got there, to Numbulwar	JL, JRB1-018-01, 00.04.12-00.04.19	elicitation (translation task)
adhərra	pierce; spear	achievement	ATM	b	y	PFV		t				past		V1-PST	yarrungkwa n-akən nenəngkwarba n-adhərra-ngə=ma akwalya	yesterday 3m-that 3m.man REAL.3M>NEUT-spear-PST=MUT NEUT.fish	the man speared the fish	JL, JRB1-018-01, 00.18.25-00.18.35	elicitation (translation task)
abərradhadha	start	achievement	ATM	b	y	PFV		t				past		V1-PST	n-aka nenəngkwarba n-abərradhadha-ngu=ma neni-k-angkarri=yedha	3m.this 3m.man REAL.3m-start-PST=MUT 3m-NSR-run=PURP	the man started to run	JL, JRB1-024-01, 00.20.53-00.21.07	elicitation (video stimuli)
lhəkə	go	achievement	ATM	b	y	PFV		t				past		V1-PST V2-PST	nəmə-lhəke-na arakba makarda=dha narr-am-angka-rnə=ma makina=dha	REAL.VEG-go-PST compl.act VEG-sea=EMPH REAL.3a.O-VEG-fetch-PST=MUT VEG.sea=TRM	It came already to the sea. The sea reached them	A3368a Side1, Chasm Island, 00:02:46.403 - 00:02:49.907	narrative
angka	fetch	achievement	ATM	b	y	PFV		t				past		V0-PST V1-PST	nəmə-lhəke-na arakba makarda=dha narr-am-angka-rnə=ma makina=dha	REAL.VEG-go-PST compl.act VEG-sea=EMPH REAL.3a.O-VEG-fetch-PST=MUT VEG.sea=TRM	It came already to the sea. The sea reached them	A3368a Side1, Chasm Island, 00:02:46.403 - 00:02:49.907	narrative
warde	kill	achievement	ATM	b	y	PFV		t				past		REDUP-V0-PST V1-PST	nen-alhə-lhəkə-nu:::wa, nenu-warda-nga yaraja	REAL3m.du-REDUP-go-PST.XTD REAL3m.du>MASC-hit-PST MASC.goanna	They kept on going (until) they killed a goanna	A3369a Side1, a3.3 Kwurrirda Kwurrirda	narrative
ngbijangə	jump	achievement	ATM	b	n	PFV		t				past		V1-PST	akena ngalh-aja ne-ngbijangə-na	and NEUT.PRO-CofR NEUT-jump-PST	and it jumped	A3369a Side 1 a3.4, Bujikeda ‘Mother cat’	narrative
lhəngaku-warbarrə	long.and.tall-split	achievement	ATM	b	y	PFV		t				past		IN-V1-PST	mu-wilyaba mamarra nəmə-lhəngaku-warbarrə-nə=ma m-akina	VEG-one VEG.small.leaved.paperbark VEG-long.and.tall-split-PST+MUT VEG-that	There was a paperbark that had fallen down	A3369a Side 1 a3.4, Bujikeda ‘Mother cat’	narrative
akuma	put	achievement	ATM	b	n	PFV		t				past		biya-XTD V1-PST	bi:::ya nuw-akuma-rna adhalyəma=manja a-kiyak-bidjina mamədhangkwa=manja	and.then.XTD REAL.NEUT>NEUT-put-PST NEUT.river=LOC NEUT-river-beside VEG.sand=LOC	Then it put the kitten down beside the river on the sand	A3369a Side 1 a3.4, Bujikeda ‘Mother cat’	narrative
ma	take	achievement	ATM	b	n	PFV		t				past		V1-PST	na-ma-nga	REAL.NEUT>NEUT-take-PST	It took another	A3369a Side 1 a3.4, Bujikeda ‘Mother cat’	narrative
rrakbi-yuwiyi-dhə	forehead-straight-INCH	achievement	ATM	b	n	PFV		t				past		V1-PST	abukwaya na-rrakbə-rrakbi-yuwiyi-dhə-na	NEUT.that.coming REAL.NEUT-REDUP-forehead-straight-INCH-PST	it went straight on	A3369a Side 1 a3.4, Bujikeda ‘Mother cat’	narrative
ma	take	achievement	ATM	b	n	PFV		t				past		biya V1-PST	biya na-ma-nga	and.then REAL.NEUT>NEUT-take-PST	and took another	A3369a Side 1 a3.4, Bujikeda ‘Mother cat’	narrative
lhawurradhə	return	achievement	ATM	b	n	PFV		t				past		V1-PST	na-lhawurradhə-na ebina-lhangwiya ngawa	REAL.NEUT-return-PST NEUT.that.same=PERL cont.act	It came back along the same way	A3369a Side 1 a3.4, Bujikeda ‘Mother cat’	narrative
ma	take	achievement	ATM	b	n	PFV		t				past		V0-PST V1-PST	nəngu-ngwarndərra-nga na-ma-ngə=ma akina	REAL.1-not.know-PST REAL.NEUT>NEUT-take-PST=MUT NEUT.that	I didn’t see it take that one	A3369a Side 1 a3.4, Bujikeda ‘Mother cat’	narrative
warde	kill	achievement	ATM	b	y	PFV		t				past		V1-PST	yingu-warda-nga	REAL.3f>NEUT-kill-PST	she killed something	A3369a Side 1 a3.4, Bujikeda ‘Mother cat’	narrative
rreku+wurra	long.and.thin-throw.away	achievement	ATM	b	y	PFV		t				past		V1-PST	nanga-rreku+wurra-ngə=ma angerriba	REAL.FEM>FEM-long.and.thin-throw.away-PST=MUT to.there	then threw it away	A3369a Side1 a3.5, Dingarna-langwa akwa wurruwarda-langwa	narrative
lhəkə	go	achievement	ATM	b	y	PFV		t				past		V0-PST V1-PST	nəm-arəmə-dha-nə-ma arakba makarda nəmə-lhəke-nə-ma	REAL.VEG-big-INCH-PST=MUT compl.act VEG.sea VEG-go-PST=MUT	It (the sea) rose higher now, (the tide) was coming (in)	A3368a Side1, Chasm Island, 00:02:32.410 - 00:02:35.000	narrative
lhəkə	go	achievement	ATM BD DEGREE	relative	y	PFV		t				past		V1-PST	umba wurru-kwala=ba na-jungwee-yi-na	and 3a-some=EMPH REAL.3a-die-RECIP-PST	but others died	A3368a Side1, Chasm Island, 00:02:56.106 - 00:02:59.898	narrative
jungwee-yi	die-RECIP	achievement	ATM GROUP	y	n	PFV		t				past		V0-PST V1-PST	na-ridhi-yi-ne=ka nuw-abardake-yi-ne=ka	REAL.3m>MASC-chop-RECIP-PST=EMPH REAL.3a-get.plenty.of-RECIP-PST=EMPH	They chopped it and gathered lots of honey	A3369a Side1 a3.5, Dingarna-langwa akwa wurruwarda-langwa	narrative
abardake-yi	get.plenty.of; collect	achievement	ATM GROUP	b	y	PFV		t				past		biya many-V1-PST	biya yirr-aja Friday=manja yirru-murndak-akuma-rna money shop=manja=dha	and.then 1a.pro-CofR Friday=LOC REAL.1a>NEUT-many-put-PST NEUT.money NEUT.shop=LOC=TRM	Then on Friday we all did put the money at the shop	A3370a SIDE1 a5.3 Akingambaja-langwa [=About Washing Ceremony]	narrative
akuma	put	achievement	ATM GROUP	b	n	PFV		t				past		V1-PST	kembirra arakba nen-alyubarə-na wənalhakəna=dha	then compl.act REAL.3m.du-eat-PST 3m.du.that=TRM	Then the two of them started eating	A3369a Side1, a3.3 Kwurrirda Kwurrirda	narrative
walka	sneak.up	achievement	ATM PREP	b	y	PFV		t				past	SoE CoS	V1-PST	ngayuwa nganu-walka-nə=ma y-akunə=wa yaraja	1.PRO REAL.1>MASC-sneak-PST=MUT MASC-that=ALL MASC.goanna	he snuck up on the goanna [and grabbed it by the tail]	CW, JRB1-001-01, 00.32.22-00.32.29	elicitation (translation task)
ngurrkwa	hunt	activity	BD CUM ACT	n	y	PFV		t				past	SoE CoS	V1-PST	nu-ngurrkwa-nə=ma yimendhu=wa	REAL.3m>3m-hunt-PST=MUT MASC.turtle=ALL	he was hunting turtles [all day]	ST, JRB1-001-01, 00.05.25-00.05.28	elicitation (translation task)
ngurrkwa	hunt	activity	BD CUM ACT	n	y	PFV		t				past	SoE CoS	V0-PST V1-PST	naka nenungkwarba nə-lakə-nə=ma Umbukumbu=wa nu-ngurrkwa-nə=ma yiburadha	3m.this 3m.man REAL.3m-go-PST=MUT Umbakumba=ALL REAL.3m>MASC-hunt-PST=MUT MASC.wallaby	the man went to Umbakumba to hunt wallabies	CW, JRB1-001-01, 00.14.13-00.14.20	elicitation (translation task)
laba	taste	activity	BD CUM ACT	n	y	PFV		t				past	SoE CoS	V1-PST	n-akana nə-laba-nə=ma amadangkwa	3m-that REAL.3m>NEUT-taste-PST=MUT NEUT.meat	he tasted the meat	CW, JRB1-001-01, 00.14.55-00.15.00	elicitation (translation task)
ngambe	swim; bathe	bounded activity	BD CUM ACT	n	y	PFV		t				past	SoE CoS	V-1-PST V0-PST V1-PST	yirra-lhəka-rnə=ma yirri-dirrərndi-nə=ma adalyuma=wa yirri-ngambe-nə=ma yakwujina	REAL.1a-go-PST=MUT REAL.1a-descend-PST=MUT NEUT.river=ALL REAL.1a-swim-PST=MUT there	we went down to swim at the river there	JL, JRB1-007-01, 00.00.36-00.00.41	narrative
wirrəmika	whistle	bounded activity	BD CUM ACT	n	y	PFV		t				past		V0-PST akwa V1-PST	akwa nu-wirrəmika-rnə=ma	and REAL.3m-whistle-PST=MUT	[he was singing] and [then] whistling	JL, JRB1-023-01, 00.23.48-00.23.51	elicitation (video stimuli)
errəngala	itch	bounded activity	BD CUM ACT	n	y	PFV		t				past		V-1-Ø V0-Ø akwa V1-PST	n-aka nenəngkwarba nə-ruk+wulyaka-ja-Ø=ma, nu-rək+wulyaka-ja-Ø anhənga akwa n-errəngala-ng=ma	3M-this 3M.man REAL.3M>NEUT-stir-CAUS-USP=MUT REAL.3M>NEUT-stir-CAUS-USP NEUT.food and REAL.3M-itch-PST=MUT	‘The man stirred the food and ate it and scratched himself'	CW, JRB1-023-01, 00.24.42-00.25.06	elicitation (video stimuli)
kurrudha	scratch	bounded activity	BD CUM ACT	n	y	PFV		t				past		V1-PST V2-PST V3-PST	yarrungkwa n-aka nenəngkwarba nu-kurrudha-ngu=ma ena=lhangwa arəngka akwa nə-mebi-nə-ma emeba akwa nu-wirrmika-rnu=ma	yesterday 3m-this 3m.man REAL.3m-scratch-PST=MUT 3m.PRO.POSS NEUT.head and REAL.3m-sing-PST=MUT NEUT.song and REAL.3m-whistle-PST=MUT	yesterday the man scratched his head, sung a song and whistled	JL, JRB1-024-01, 00.15.19-00.15.58	elicitation (video stimuli)
lubu	hunt	bounded activity	BD CUM ACT	n	y	PFV		t				past		V1-PST	dirnd-enikba akwa naburra-dikba neni-lubu-na yinungungwangba=wa	3f.mother-KIN.3m and 3m.son-KIN.3f REAL.3m.du>MASC-hunt-PST MASC.animal=ALL	A mother and her son went hunting for animals with their dogs	A3369a Side1, a3.3 Kwurrirda Kwurrirda	narrative
yenjala	talk.while.walking	bounded activity	BD CUM ACT	n	y	PFV		t				past		V1-PST	ni-yenjala-nga n-aka lukwakwa ngawa=dha	REAL.3m-talk.while.walking-PST 3m-this on.the.way cont.act=TRM	He kept on and on talking along the way	A3369a Side1, a3.3 Kwurrirda Kwurrirda	narrative
akwuleyi	compete; race	bounded activity	BD CUM ACT	n	y	PFV		t				past		V1-PST V2-PST	ngalh-aja dhərnd-enikba nen-akwuleyi-nə=mərra, yingi-nə-lharrma-ngə=mərra ayika=mərra	3f.PRO-CofR 3f.mother-KIN.3m REAL.3m.du-compete-PST=MUT REAL.3f-3m-chase-PST=MUT NEUT.stick=INST	His mother chased him with a stick	A3369a Side1, a3.3 Kwurrirda Kwurrirda	narrative
lharrma	chase	bounded activity	BD CUM ACT	n	y	PFV		t				past		V0-PST V1-PST	ngalh-aja dhərnd-enikba nen-akwuleyi-nə=mərra, yingi-nə-lharrma-ngə=mərra ayika=mərra	3f.PRO-CofR 3f.mother-KIN.3m REAL.3m.du-compete-PST=MUT REAL.3f-3m-chase-PST=MUT NEUT.stick=INST	His mother chased him with a stick	A3369a Side1, a3.3 Kwurrirda Kwurrirda	narrative
angkarrə	run	bounded activity	BD CUM ACT	n	y	PFV		t				past		V0-PST-XTD V1-PST	n-angkarrə-nə-mərru:::=wa, nu-kwa+bijanga-Ø ayika=manja	REAL.3M-run-PST=MUT.XTD=PL REAL.3M-jump-USP NEUT.tree=LOC	He kept on running (until) he jumped behind a tree	A3369a Side1, a3.3 Kwurrirda Kwurrirda	narrative
dhərrərndhə	descend	bounded activity	BD CUM ACT	n	y	PFV		t				past		REDUP-V1-PST-XTD V2-PST	nen-alhə-lhəkə-nu:::wa, neni-dhərrərndhə-nga, adhalyuma=manja	REAL.3m.du-REDUP-go-PST.XTD REAL.3m.du-descend-PST NEUT.river=LOC	The two of them kept on walking (until) they got down to the river	A3369a Side1, a3.3 Kwurrirda Kwurrirda	narrative
lhəkə	go	bounded activity	BD CUM ACT	n	y	PFV		t				past		REDUP-V0-PST-XTD V1-PST	nen-alhə-lhəkə-nu:::wa, neni-dhərrərndhə-nga, adhalyuma=manja	REAL.3m.du-REDUP-go-PST.XTD REAL.3m.du-descend-PST NEUT.river=LOC	The two of them kept on walking (until) they got down to the river	A3369a Side1, a3.3 Kwurrirda Kwurrirda	narrative
embərrari	wait	bounded activity	BD CUM ACT	n	y	PFV		t				past		V1-PST	en-eja n-akəna nabərra-dhikba ngawa n-embərrari-nə=ma	3m.PRO-CofR 3m-that 3m.son-KIN.3f cont.act REAL.3m-wait-PST=MUT	Her son kept on waiting [until it was cooked]	A3369a Side1, a3.3 Kwurrirda Kwurrirda	narrative
mebi	sing	bounded activity	BD CUM ACT	n	y	PFV		t				past		REDUP-V1-PST-XTD	n-akəna nə-mebə-mebi-nə=mərra ngawa	3m-that REAL.3m-REDUP-sing-PST=MUT cont.act		A3369a Side1, a3.3 Kwurrirda Kwurrirda	narrative
ngwadhə	cry	bounded activity	BD CUM ACT	n	y	PFV		t				past		V0-PST V1-PST	nə-ngwadhə-na kemba nə-ngwadhə-na n-ibəna ngawa arakba	REAL.3m-cry-PST then 3m-cry-PST 3m-this cont.act compl.act	He started crying. And he kept on crying	A3369a Side1, a3.3 Kwurrirda Kwurrirda	narrative
akadha	make.own.sound	bounded activity	BD CUM ACT	n	y	PFV		t				past		V1-PST	erribabe=ka nuw-akadha-ngee=ka enəng-angk-awura	to.here=EMPH REAL.NEUT-make.own.sound-PST=EMPH NEUT.ALP-times-alone	It kept on crackling towards us all the time	A3369a Side 1 a3.4, Bujikeda ‘Mother cat’	narrative
akurraju	look.after	bounded activity	BD CUM ACT	n	y	PFV		t				past		V1-PST	nuw-akurraju-wa a-bə-bərra-dha=dha	REAL.NEUT>NEUT-look.after-PST NEUT-RDP-offspring-3f.KIN=EMPH	it looked after them	A3369a Side 1 a3.4, Bujikeda ‘Mother cat’	narrative
lhəke	go	bounded activity	BD CUM ACT	n	y	PFV		t				past		REDUP-V1-PST V2-PST	n-alhə-lhəke-ne=ka n-akənu:::wa, nu-murndaku-warda-nga	REAL.3m-REDUP-go-PST=EMPH 3m-that.XTD REAL.3m>MASC-many-kill-PST	He kept on walking (until he found) some animals and killed them	A3369a Side1 a3.5, Dingarna-langwa akwa wurruwarda-langwa	narrative
anjirrike-yi	hurry-RECIP	bounded activity	BD CUM ACT	n	y	PFV		t				past		V1-PST V2-PST	arakba ying-anjirrike-yi-na ying-angkarrə-na	compl.act REAL.FEM-hurry-RECIP-PST FEM-run-PST	So she hurried and ran fast	A3369a Side1 a3.5, Dingarna-langwa akwa wurruwarda-langwa	narrative
angkarrə	run	bounded activity	BD CUM ACT	n	y	PFV		t				past		V0-PST V1-PST	arakba ying-anjirrike-yi-na ying-angkarrə-na	compl.act REAL.FEM-hurry-RECIP-PST FEM-run-PST	So she hurried and ran fast	A3369a Side1 a3.5, Dingarna-langwa akwa wurruwarda-langwa	narrative
akadha	bark	bounded activity	BD CUM ACT	n	y	PFV		t				past		V1-PST	ying-akadha-ngə=mərra	REAL.FEM-bark-PST=MUT	She barked	A3369a Side1 a3.5, Dingarna-langwa akwa wurruwarda-langwa	narrative
be-yi	argue-RECIP	bounded activity	BD CUM ACT	n	y	PFV		t				past		V1-PST	adinuba=wiya wurring-alakina Wakaba akwa Dangmiyala narringi-be-yi-na	soon=QUANT 3fdu-those.two Wakaba and Dangmiyala REAL.3fdu-argue-RECIP-PST	At first Wakaba and Dangmiyala had an argument	A3370a SIDE1 a5.3 Akingambaja-langwa [=About Washing Ceremony]	narrative
engkingkirre	think	bounded activity	BD CUM ACT	n	y	PFV		t				past		V1-PST	ying-engkingkirre-na	REAL.3f-think-PST	Then (Wakaba) kept on thinking	A3370a SIDE1 a5.3 Akingambaja-langwa [=About Washing Ceremony]	narrative
lyuwaka	spin	bounded activity	BD CUM ACT	n	y	PFV		t				past		V1-PST	yarna yirre-nu-wurraki-lyuwaka-ju-wa-ma yarnumamalya	1a.this REAL.1a-3m-many-spin-CAUS-PST=MUT 1a.people	then he went all around us	A3370a SIDE1 a5.3 Akingambaja-langwa [=About Washing Ceremony]	narrative
engkərre	listen; hear	bounded activity	BD CUM ACT	n	y	PFV		t				past		V1-PST V2-PST	nəngu-ngwarndərra-nga na-ma-ngə=ma akina	REAL.1-not.know-PST REAL.NEUT>NEUT-take-PST=MUT NEUT.that	I didn’t see it take that one	A3369a Side 1 a3.4, Bujikeda ‘Mother cat’	narrative
ngwarndərra	not.know	state	BD CUM State NEG	n	n	PFV		t				past		REDUP-V1-PST V2-PST	nen-alhə-lhəkə-nu:::wa, nenu-warda-nga yaraja	REAL3m.du-REDUP-go-PST.XTD REAL3m.du>MASC-hit-PST MASC.goanna	They kept on going (until) they killed a goanna	A3369a Side1, a3.3 Kwurrirda Kwurrirda	narrative
lhəkə	go	bounded activity	BD PLUR ACT	closed	y	PFV		t				past		V1-PST	yiningerribirre=ka yinungungwangba nen-abardake-yi-na	MASC.any.kind=ka MASC.animal REAL.3m.du-get.plenty.of-RECIP-PST	They got lots of animals of all kinds	A3369a Side1, a3.3 Kwurrirda Kwurrirda	narrative
abardake-yi	get.plenty.of; collect	bounded activity	BD PLUR ACT	n	y	PFV		t				past		biya V1-PST	biya yingənə-warda-nga ambaka ayika=mərra	and.then REAL.3f>3m-hit-PST then NEUT.stick=INST NEUT.stick	Then she gave him a hiding with a stick	A3369a Side1, a3.3 Kwurrirda Kwurrirda	narrative
warde	hit	bounded iterated achievement	BD PLUR ACT	dna	y	PFV		t				past		V0-PST V1-PST V2-PST	yarrungkwa n-aka nenəngkwarba nu-kurrudha-ngu=ma ena=lhangwa arəngka akwa nə-mebi-nə-ma emeba akwa nu-wirrmika-rnu=ma	yesterday 3m-this 3m.man REAL.3m-scratch-PST=MUT 3m.PRO.POSS NEUT.head and REAL.3m-sing-PST=MUT NEUT.song and REAL.3m-whistle-PST=MUT		JL, JRB1-024-01, 00.15.19-00.15.58	elicitation (video stimuli)
mebi	sing	activity	CUM ACT UBD	n	y	IMPF		t				past		V-1-PST V0-PST V1-PST	yarrungkwa n-aka nenəngkwarba nu-kurrudha-ngu=ma ena=lhangwa arəngka akwa nə-mebi-nə-ma emeba akwa nu-wirrmika-rnu=ma	yesterday 3m-this 3m.man REAL.3m-scratch-PST=MUT 3m.PRO.POSS NEUT.head and REAL.3m-sing-PST=MUT NEUT.song and REAL.3m-whistle-PST=MUT		JL, JRB1-024-01, 00.15.19-00.15.58	elicitation (video stimuli)
wirrmika	whistle	activity	CUM ACT UBD	n	y	IMPF		t				past		V1-PST	n-angkarrə-nə=m yeya	REAL.3m-run-PST=MUT MASC.footstep	he was running	JL, JRB1-024-01, 00.18.26-00.18.28	elicitation (video stimuli)
angkarrə	run	activity	CUM ACT UBD	n	y	IMPF		t				past		V1-PST	yarrungkwa n-akəna nenəngkwarba n-emburrarə-nə=ma n-akinə=wa nu-wilyaba nenəngkwarba	yesterday 3m-that 3m.man REAL.3m-wait-PST=MUT 3m-that=ALL 3m-one 3m.man	yesterday the man was waiting for the other man	JL, JRB1-024-01, 00.14.46-15.42	elicitation (video stimuli)
emburrarə	wait	activity	CUM ACT UBD	n	y	IMPF		t				past		V1-PST NEG IRR-V2-PST	yarrungkwa n-aka nenəngkwarba ni-ngk-arranga-rnu=ma ayika akena nara ka-kw+arri-na	yesterday 3m-this 3m.man REAL.3m>NEUT-half-cut-PST=MUT NEUT.tree but NEG IRR.3m>NEUT-half+break-PST	yesterday the man was cutting the branch, but it didn't break	JL, JRB1-029-01, 00.06.23-00.06.35	elicitation (video stimuli)
ngk-arranga	half-cut	activity	CUM ACT UBD	n	y	IMPF		t				past		V1-PST	na-lyelyimbukwe-yi-na abərrəwa w-arniniyerringka=wiya=dha	REAL.3a-discuss-RECP-PST 3a.PRO 3a.old.man=QUANT=EMPH	They were talking old people to each other	A3368a Side1, Chasm Island, 00:00:38.705 - 00:00:41.765	narrative
lyelyimbukwe-yi	discuss-RECIP	activity	CUM ACT UBD	n	y	IMPF		t				past	Background	V0-PST V1-PST	biya na-lhəka-rna arakba wurr-akina na-mədheeyi-na libaliba=ma=dha	and REAL.3a-go-PST compl.act 3a-that REAL.3a-paddle-PST VEG.canoe=INST=EMPH	and they went off, paddling their canoes	A3368a Side1, Chasm Island, 00:00:57.960 - 00:01:00.530	narrative
mədheeyi	paddle	activity	CUM ACT UBD	n	y	IMPF		t				past		V1-PST	nuw-engk-ingkərre-nu:::wa	REAL.3a-REDUP-hear-PST:::XTD	They kept on listening	A3368a Side1, Chasm Island, 00:02:15.875 - 00:02:18.950	narrative
andaka	hunt	activity	CUM ACT UBD	n	y	IMPF		t				past	Overlap	V1-PST	n-andaka-rnə-ma	REAL.3m>NEUT-hunt-PST=MUT	he was hunting [with a spear]	ST, JRB1-001-01, 00.00.37-00.00.39	elicitation (translation task)
mənandabe	wonder	activity	CUM ACT UBD	n	y	IMPF		t				past		V1-RECIP-PST V2-PST	yirri-mənandabe-yi-nə=ma mena ena akungkwa ne-yukwaja-dhə-nə=ma	REAL.1a-wonder-RECIP-PST=MUT because NEUT.this NEUT.water REAL.NEUT-small-INCH-PST=MUT	we were wondering about this river getting shallow	JL, JRB1-007-01, 00.01.49-00.01.58	narrative
mebi	sing	activity	CUM ACT UBD	n	y	IMPF		t				past		V1-PST	yarrungkwa n-akəna nenəngkwarba nə-mebi-nə=ma emeba	yesterday 3m-that 3m.man REAL.3m-sing-PST=MUT NEUT.song	yesterday the man was singing	JL, JRB1-023-01, 00.07.50-00.07.58	elicitation (video stimuli)
angkarrə	blow; run	activity	CUM ACT UBD	n	n	IMPF		t				past		V1-PST	əmba en-eja n-akwukawura nə-malyumalyangkə-nə=ma n-akəna=dha	but 3f.PRO-CofR 3m-alone REAL.3m-play-PST=MUT 3m-that=TRM	[She kept on sleeping,] but the little boy played all by himself	A3369a Side1, a3.3 Kwurrirda Kwurrirda	narrative
arəmbənadhə	spread	activity	CUM ACT UBD	n	n	IMPF		t				past		V1-PST	m-adhərrungwarnee=ka mamarika nəm-angkarrə-na	VEG-big=EMPH VEG.southeast.wind REAL.VEG-run-PST	A big southeast wind was blowing	A3369a Side 1 a3.4, Bujikeda ‘Mother cat’	narrative
ngurrkwe	hunt	activity	CUM ACT UBD	n	y	IMPF		t				past		V1-PST	ngalhajee=ka angura adhərrungwarnee=ka nuw-arəmbənadhə-na	NEUT.PRO=EMPH NEUT.fire NEUT.big=EMPH REAL.NEUT-spread-PST		A3369a Side 1 a3.4, Bujikeda ‘Mother cat’	narrative
arda	call	activity	CUM ACT UBD	n	y	IMPF		t				past		V1-PST	akena dhə-rnd-arringba dhukwee=ka awilyikerra yingu-ngurrkwe-nə=ma akwalyu=wa=dha	but 3f-mother-3a.KIN maybe=EMPH a.long.way.off REAL.3f-hunt-PST=MUT NEUT.meat=ALL=TRM	Maybe the mother had been hunting a long way for meat	A3369a Side 1 a3.4, Bujikeda ‘Mother cat’	narrative
malyumalyangkə	play	activity	CUM ACT UBD	n	y	IMPF		t				past		kembirra V1-PST	kembirra nuw-arda-ngu=ma dhərnd-arringbu=wa	then REAL.COLL-call.out-PST=MUT 3f.mother-KIN.3a=ALL	that little one was calling out to its mother	A3369a Side1 a3.5, Dingarna-langwa akwa wurruwarda-langwa	narrative
akudhangu-dhə	become.near	scalar achievement	CUM CoS Scal UBD	open	n	IMPF		t				past		V1-PST=TRM	ngalh-aja angura abukwaya nuw-akudhangu-dhə-nə=dha	NEUT.PRO-CofR NEUT.fire NEUT.coming NEUT-near-INCH-PST=TRM	The fire was coming closer	A3369a Side 1 a3.4, Bujikeda ‘Mother cat’	narrative
alyubarə	eat	scalar achievement	CUM CoS Scal UBD	open	y	IMPF		t				past		V1-PST	ambaka+lhangwa na-mənəngka-dhə-nə=ma ena angalya	slowly REAL.NEUT-different-INCH-PST=MUT NEUT.this NEUT.place	slowly this place seems to get different	JL, JRB1-007-01, 00.01.29-00.01.34	narrative
warriya-dhə	be.sad	state	CUM STATE UBD	dna	n	IMPF		t				past		NI-V1-PST	n-aka nenəngkwarba nu-werrku+warriya-dhə-nə=ma	3m-this 3m.man REAL.3m-chest+sad-INCH-PST=MUT	the man was feeling sad	JL, JRB1-022-01, 00.02.34-00.02.36	elicitation (video stimuli)
ngwədhangma	be.open	state	CUM STATE UBD	n	n	IMPF		t				past		V1-PST	akəna door=a na-ngwədhangmə-nə=ma	NEUT.that NEUT.door=PF REAL.NEUT-be.open-PST=MUT	the door was open	JL, JRB1-022-01, 00.01.24-00.01.29	elicitation (video stimuli)
iki-lyangbadhə	tree-go.across	state	CUM STATE UBD	n	n	IMPF		t				past		IN-V1-PST	nəm-iki-lyangbadhə-nga=ma adhalyəma=manja	REAL.VEG-tree-go.across-PST=MUT NEUT.river=LOC	it (the tree) was lying across the river	A3369a Side 1 a3.4, Bujikeda ‘Mother cat’	narrative
errukulhə	be.sorry	state	CUM STATE UBD	n	y	IMPF		t				past		V1-PST	ngayuwee=ka nəng-errukulhə-nə-mee=ka	1.PRO=EMPH REAL.1-be.sorry-PST=MUT=EMPH	I felt sorry for her	A3369a Side 1 a3.4, Bujikeda ‘Mother cat’	narrative
alharə-dhə	burnt.off.bush-INCH	state	CUM STATE UBD	b	n	IMPF		t				past		V1-PST	ne-kalharə-dhə-na erribaba	REAL.NEUT-burnt.off.bush-INCH-PST to.here	It burnt towards us	A3369a Side 1 a3.4, Bujikeda ‘Mother cat’	narrative
ajirra	wash	Hab Activity	CUMT STATE HAB ACT	n	n	IMPF		t				past	Overlap	V1-PST RED-V2-Ø	narrəma-mərndak-ajirra-ngə=ma dhəmbalha-mərriya narrəma-mərndak-ara-rurrmaja-Ø=ma karrawara amarda-mirriya=manja	REAL.3A>VEG-many-wash-PST=MUT VEG.clothes-the.rest REAL.3A>VEG-many-REDUP-dry-USP=MUT above NEUT.grass-the.rest=LOC	[we used to watch older women at the river] wash their clothes and dry [them] on dry grasses	JL, JRB1-007-01, 00.00.51-00.01.08	narrative
ngurrkwa	hunt	Hab Activity	CUMT STATE HAB ACT	n	y	IMPF		t				past	Overlap	V1-PST	ngayuwa ngə-ngurrukwa-nə-ma dhənungkwulangwa	1.PRO REAL.1>FEM-hunt-PST=MUT FEM.dugong	I used to hunt dugong [when I was young]	CW, JRB1-001-01, 00.07.13-00.07.16	elicitation (translation task)
mənəngka-dhə	become.different	CoS	INCH ATM	b	n	PFV		t				past		V0-RECIP-PST V1-PST	yirri-mənandabe-yi-nə=ma mena ena akungkwa ne-yukwaja-dhə-nə=ma	REAL.1a-wonder-RECIP-PST=MUT because NEUT.this NEUT.water REAL.NEUT-small-INCH-PST=MUT	we were wondering about this river getting shallow	JL, JRB1-007-01, 00.01.49-00.01.58	narrative
yukwaja-dhə	become.shallow; become.small	CoS	INCH ATM	n	n	PFV		t				past		V1-PST V2-PST	nəm-arəmə-dha-nə-ma arakba makarda nəmə-lhəke-nə-ma	REAL.VEG-big-INCH-PST=MUT compl.act VEG.sea VEG-go-PST=MUT	It (the sea) rose higher now, (the tide) was coming (in)	A3368a Side1, Chasm Island, 00:02:32.410 - 00:02:35.000	narrative
arəmə-dha	get.big; rise	CoS	INCH ATM	b	n	PFV		t				past		V1-PST	akwa nəmə-yalkwudi-na arakba m-akina makarda	and REAL.VEG-become.low.tide-PST compl.act VEG-that VEG.sea	and the tide went out	A3368a Side1, Chasm Island, 00:03:17.506 - 00:03:19.697	narrative
yalkwudi	become.low.tide	CoS	INCH ATM	b	n	PFV		t				past		V1-PST V2-PST	nə-ngwadhə-na kemba nə-ngwadhə-na n-ibəna ngawa arakba	REAL.3m-cry-PST then 3m-cry-PST 3m-this cont.act compl.act	He started crying. And he kept on crying	A3369a Side1, a3.3 Kwurrirda Kwurrirda	narrative
ngwadhə	cry	inchoative activity	INCH ATM	b	y	PFV		t				past		V1-PST arakba	nə-ridha-nga arakba yilyakwa n-akəna=dha	REAL.3m>MASC-chop-PST compl.act MASC.sugarbag 3m-that=TRM	Then he started chopping the sugarbag	A3369a Side1 a3.5, Dingarna-langwa akwa wurruwarda-langwa	narrative
ridha	chop	inchoative pluractional	INCH ATM PLUR	n	y	PFV		t				past		V0-Ø akwa V1-PST	akəna door=a na-ngwudhangma-Ø akwa na-dhəka-jungu-nə=ma	NEUT.that NEUT.door REAL.NEUT-be.open-USP and REAL.NEUT-be.closed-REFL-PST=MUT	‘the door is open, and then it got shut’	JL, JRB1-023-01, 00.01.54-00.02.02	elicitation (video stimuli)
dhəka-jungu	be.closed-REFL	inchoative state	INCH ATM STATE	dna	n	PFV		t				past		V1-PST	na-rukwu-lyəke-na m-akina makarda	REAL.3a-body-spin-PST VEG-that VEG.sea	spinning around in the sea	A3368a Side1, Chasm Island, 00:01:33.130 - 00:01:35.290	narrative
rukwu+lyake	go.around	activity	PLUR ACT UBD	n	n	IMPF		t				past		V1-PST	nu-kwurridhi-jungu-nə-ma	REAL.3m-scratch-REFL-PST=MUT	he was scratching himself	JL, JRB1-023-01, 00.26.52-00.27.02	elicitation (video stimuli)
kwurridhi-jungu	scratch	activity	PLUR ACT UBD	n	y	IMPF		t				past		V1-PST	yarrungkwa n-akəna nəjarrngalya nenu-warda-ngə=ma mardawa-mirriya	yesterday 3m-that 3m.boy REAL.3m>VEG?-kill-PST=MUT VEG.red.ant-the.rest	the boy was killing the ants	JL, JRB1-018-01, 00.23.37-00.23.51	elicitation (translation task)
warde	kill	iterated achievement or hab achievement	PLUR UBD ACH or HAB ACH	dna	n	IMPF		t				past		V1-PST	yarrungkwa ngayuwa nəngə-bekə-nə=ma tea=a	yesterday 1.PRO REAL.1-drink-PST=MUT NEUT.tea=PF	yesterday I drank the tea	JL, JRB1-023-01, 00.13.00-00.13.06	elicitation (video stimuli)
bekə	drink	accomplishment	Q INCR	n	y	PFV		t				past		akwa V0-∅ arakba V1-PST	akwa n-angkarra-Ø arakba nu-wurda-nga angwarnda=manja abalkaya=dha	and REAL.3M-run-USP COMPL.ACT REAL.3M-climb-PST NEUT.stone=LOC above=TRM	‘And he ran off (and) climbed high on the rocks’	A3368a Side1, Chasm Island, 00:01:38.930-00:01:43.290	narrative
wurda	climb	accomplishment	Q INCR	n	y	PFV		t				past		V1-PST	angurrkwurrikba-wa angerriba angwarnda na-wurdi-yi-na	salt.lake-ALL to.over.there NEUT.stone REAL.3a-climb-RECIP-PST	they climbed the rocks over there near Angurrkwurrikba (Salt Lake)	A3368a Side1, Chasm Island, 00:03:06.311 - 00:03:10.052	narrative
wurda	climb	accomplishment	Q INCR	n	y	PFV		t				past		V1-PST	nenə-lingkarrnga-rna yaraja	REAL.3m.du>MASC-dig-PST MASC.goanna	They dug up a goanna	A3369a Side1, a3.3 Kwurrirda Kwurrirda	narrative
lingkarrnga	dig	accomplishment	Q INCR	n	y	PFV		t				past		V1-PST V2-PST	na-ridhi-yi-ne=ka nuw-abardake-yi-ne=ka	REAL.3m>MASC-chop-RECIP-PST=EMPH REAL.3a-get.plenty.of-RECIP-PST=EMPH	They chopped it and gathered lots of honey	A3369a Side1 a3.5, Dingarna-langwa akwa wurruwarda-langwa	narrative
ridhi	chop	accomplishment	Q INCR	closed	y	PFV		t				past		REDUP-V0-PST V1-PST	n-alhə-lhəke-ne=ka n-akənu:::wa, nu-murndaku-warda-nga	REAL.3m-REDUP-go-PST=EMPH 3m-that.XTD REAL.3m>MASC-many-kill-PST	He kept on walking (until he found) some animals and killed them	A3369a Side1 a3.5, Dingarna-langwa akwa wurruwarda-langwa	narrative
warda	kill	accomplishment	Q INCR	closed	y	PFV		t				past		V1-PST V2-PST	biya na-lhəka-rna arakba wurr-akina na-mədheeyi-na libaliba=ma=dha	and REAL.3a-go-PST compl.act 3a-that REAL.3a-paddle-PST VEG.canoe=INST=EMPH	and they went off, paddling their canoes	A3368a Side1, Chasm Island, 00:00:57.960 - 00:01:00.530	narrative

## Sheet: All PR
walka	sneak.up	activity	CUM ACT UBD	b	y	IMPF	t					present		V1-NPST	nanu-walka-ja-ma nanəngkamjenikbu=wa	REAL.3m>3m-sneak.up-NPST=MUT 3m.younger.brother=ALL	he's sneaking to his brother	CW, JRB1-001-01, 00.23.36-00.24.43	elicitation (translation task)
lalawayi-ji	stretch.out	activity	CUM ACT UBD	n	y	IMPF	t					present		V1-NPST	nə-lalawayi-ji-na=ma ena=lhangwa ayerrka	REAL.3m-stretch.out-CAUS-NPST=MUT 3m.PRO=POSS NEUT.hand	he stretches out his hand	JL, JRB1-022-01, 00.15.41-15.50	elicitation (video stimuli)
mebi	sing	activity	CUM ACT UBD	n	y	IMPF	t					present		V1-NPST	n-aka nenəngkwarba nə-mebi-na=ma	3m-this 3m.man REAL.3m-sing-NPST=MUT	the man is singing	JL, JRB1-023-01, 00.07.20-00.07.26	elicitation (video stimuli)
arrkərre	draw	activity	CUM ACT UBD	n	y	IMPF	t					present		V1-NPST akwa V2-NPST akwa V3-NPST	n-aka nenəngkwarba n-arrkərre-na-ma mamudang=manja akwa n-arrangali-jungu-na=ma akwa nə-mebi-na=ma	3m.this 3m.man REAL.3m-write-NPST=MUT VEG.sand=LOC and REAL.3m-scratch-REFL-NPST=MUT and REAL.3m-sing-NPST=MUT	the man is drawing on the sand and scratching himself and singing	JL, JRB1-023-01, 00.34.36-00.00.35.06	elicitation (video stimuli)
mebi	sing	activity	CUM ACT UBD	n	y	IMPF	t					present		V-1-NPST akwa V0-NPST akwa V1-NPST	n-aka nenəngkwarba n-arrkərre-na-ma mamudang=manja akwa n-arrangali-jungu-na=ma akwa nə-mebi-na=ma	3m.this 3m.man REAL.3m-write-NPST=MUT VEG.sand=LOC and REAL.3m-scratch-REFL-NPST=MUT and REAL.3m-sing-NPST=MUT	the man is drawing on the sand and scratching himself and singing	JL, JRB1-023-01, 00.34.36-00.00.35.06	elicitation (video stimuli)
larrukwa	taste; try	activity	CUM ACT UBD	n	y	IMPF	t					present		V1-NPST	nə-larrukwa-ja	REAL.3m-taste-NPST	he's tasting [it]	CW, JRB1-001-01, 00.20.58-00.21.03	elicitation (translation task)
bekə	drink	activity	CUM ACT UBD	n	y	IMPF	t					present		V1-NPST	n-aka nenəngkwarba ni-bekə-na=ma	3m-this 3m.man REAL.3m-drink-NPST=MUT	the man is drinking	CW, JRB1-023-01, 00.11.40-00.11.46	elicitation (video stimuli)
ngurrkwa	hunt	state hab activity	CUM STATE HAB ACT	n	y	IMPF	t					present		V1-NPST	nu-ngurrkwa-ja=ma yimendhu=wa	REAL.3m>3m-hunt-NPST=MUT MASC.turtle=ALL	he hunts turtles	ST, JRB1-001-01, 00.01.31-00.01.33	elicitation (translation task)
ngurrkwa	hunt	state hab activity	CUM STATE HAB ACT	n	y	IMPF	t					present		V1-NPST	n-aka nanungkwarba enungkwa=ma nu-ngurrkwa-ja=ma	3m-this 3m.man NEUT.spear=INST REAL.3m>NEUT-hunt-PST=MUT	this man hunts with a spear	ST, JRB1-001-01, 00.01.04-00.01.08	elicitation (translation task)
yuwee-yi	follow-RECIP	state modal	CUM STATE UBD	n	y	IMPF	t					present		V1-NPST akwa V2-NPST	yirrə-yuwee-yi-na abalkaya ngarri-lhəka-ja	REAL.13a-follow-RECP-NPST above REAL.12a-go-NPST	let's follow, let's go up high	A3368a Side1, Chasm Island, 00:01:59.705 - 00:02:02.475	narrative
lhəkə	go	state modal	CUM STATE UBD	n	y	IMPF	t					present		V1-NPST V2-NPST	ngə-lhəka-ja=ma ngə-ngurrkwa-ja=ma yimendhu=wa	REAL.1-go-NPST=MUT REAL.1>MASC.hunt-NPST=MUT MASC.turtle=ALL	I am going to hunt turtle	ST, JRB1-001-01, 00.03.13-00.03.17	elicitation (translation task)
ngurrkwa	hunt	state modal	CUM STATE UBD	n	y	IMPF	t					present		V0-NPST V1-NPST	ngə-lhəka-ja=ma ngə-ngurrkwa-ja=ma yimendhu=wa	REAL.1-go-NPST=MUT REAL.1>MASC.hunt-NPST=MUT MASC.turtle=ALL	I am going to hunt turtle	ST, JRB1-001-01, 00.03.13-00.03.17	elicitation (translation task)
lhəkə	go	state modal	CUM STATE UBD	n	y	IMPF	t					present		V1-NPST	ngayuwa ngə-ləka-ja=ma akwalyu=wa	1.PRO REAL.1-go-NPST=MUT NEUT.fish=ALL	I'm going fishing	ST, JRB1-001-01, 00.08.36-00.08.39	elicitation (translation task)
ngwanja-jə	stop	state modal	CUM STATE UBD	n	n	IMPF	t					present		V1-PST	ngumu-ngwanja-jə-na=ma duraka	REAL.1>VEG-stop-CAUS-NPST=MUT VEG.car	I'm stopping the car	JL, JRB1-018-01, 00.15.37-00.15.42	elicitation (translation task)
lhəkə	go	state modal	CUM STATE UBD	n	y	IMPF	t					present		V1-NPST V1-NPST V2-NPST	arakba ngarrə-lhəka-ja ngarna ngarrə-lhəka-ja=ma ngarrə-m-ardhərre-na=ma makarda m-akina	compl.act REAL.12a-go-NPST 12a.that REAL.12a-go-NPST=MUT REAL.12a-VEG-spear-NPST=MUT VEG.sea VEG-that	we are going now (let's go), we going to hit (spear) that sea (and spear the sea)	A3368a Side1, Chasm Island, 00:00:42.645 - 00:00:51.160	narrative
adhərrə	spear; pierce	state modal	CUM STATE UBD	n	y	IMPF	t					present		V0-NPST V0-NPST V1-NPST	arakba ngarrə-lhəka-ja ngarna ngarrə-lhəka-ja=ma ngarrə-m-ardhərre-na=ma makarda m-akina	compl.act REAL.12a-go-NPST 12a.that REAL.12a-go-NPST=MUT REAL.12a-VEG-spear-NPST=MUT VEG.sea VEG-that	we are going now (let's go), we going to hit (spear) that sea (and spear the sea)	A3368a Side1, Chasm Island, 00:00:42.645 - 00:00:51.160	narrative
lhəkə	go	state modal	CUM STATE UBD	n	y	IMPF	t					present		V0-NPST akwa V1-NPST	yirrə-yuwee-yi-na abalkaya ngarri-lhəka-ja	REAL.13a-follow-RECP-NPST above REAL.12a-go-NPST	let's follow, let's go up high	A3368a Side1, Chasm Island, 00:01:59.705 - 00:02:02.475	narrative
mudilyakbə	cough	semelfactive iterative	PLU SEM UBD	dna	n	IMPF	t					present		V1-NPST	n-akəna nenəngkwarba nə-mudilyakbə-na=ma	3m-that 3m.man REAL.3m-cough-NPST=MUT	the man is coughing	JL, JRB1-023-01, 00.08.30-00.08.34	elicitation (video stimuli)
rukwu+lyake	go.around	activity	PLUR ACT UBD	n	n	IMPF	t					present		V1-NPST	dh-aka fan yingu-rukwu+lyake-na=ma	FEM.that FEM.fan REAL.FEM-go.around-NPST=MUT	the fan spins around	JL, JRB1-023-01, 00.10.50-00.10.58	elicitation (video stimuli)
lyangk-wama-jə	blink	semelfactive iterative	PLUR SEM ATM UBD	b	y	IMPF	t					present		V1-NPST	nungkwa nungku-ma-lyangk-wama-jə-na=ma memba	2.PRO REAL.2-VEG-head+nod-CAUS-NPST=MUT VEG.eye	you're blinking your eye	JL, JRB1-023-01, 00.14.58-00.15.04	elicitation (video stimuli)
ekekirrarji	come.and.go	semelfactive iterative	PLUR SEM ATM UBD	n	y	IMPF	t					present		V1-NPST	nuw-ekekirrarji-na=ma warenja=ba=wiya=baba	REAL.NEUT-come.and.go-NPST=MUT quickly-EMPH=QUANT=REAS	because it's coming and going so quickly	A3369a Side 1 a3.4, Bujikeda ‘Mother cat’	narrative
errəngala-jungu	itch	iterated semelfactive	PLUR SEM UBD	n	y	IMPF	t					present		V0-NPST akwa V1-NPST akwa V2-NPST	n-aka nenəngkwarba n-arrkərre-na-ma mamudang=manja akwa n-arrangali-jungu-na=ma akwa nə-mebi-na=ma	3m.this 3m.man REAL.3m-write-NPST=MUT VEG.sand=LOC and REAL.3m-scratch-REFL-NPST=MUT and REAL.3m-sing-NPST=MUT	the man is drawing on the sand and scratching himself and singing	JL, JRB1-023-01, 00.34.36-00.00.35.06	elicitation (video stimuli)

## Sheet: Achievement PST
adhərrə	spear; pierce	achievement	ATM	b	y	PFV		t				past	SoE CoS	V1-PST	ngayuwa ngən-adhərra-ng=ma yiburadha	1.PRO REAL.1>MASC-spear-PST=MUT MASC.wallaby	I speared the wallaby	ST, JRB1-001-01, 00.06.09-00.06.15	elicitation (translation task)
lhəkə	go	achievement	ATM	b	y	PFV		t				past	SoE CoS	V1-PST V2-PST	naka nenungkwarba nə-lakə-nə=ma Umbukumbu=wa nu-ngurrkwa-nə=ma yiburadha	3m.this 3m.man REAL.3m-go-PST=MUT Umbakumba=ALL REAL.3m>MASC-hunt-PST=MUT MASC.wallaby	the man went to Umbakumba to hunt wallabies	CW, JRB1-001-01, 00.14.13-00.14.20	elicitation (translation task)
lhəka	go	achievement	ATM	b	y	PFV		t				past	SoE CoS	V1-PST V2-PST V3-PST	yirra-lhəka-rnə=ma yirri-dirrərndi-nə=ma adalyuma=wa yirri-ngambe-nə=ma yakwujina	REAL.1a-go-PST=MUT REAL.1a-descend-PST=MUT NEUT.river=ALL REAL.1a-swim-PST=MUT there	we went down to swim at the river there	JL, JRB1-007-01, 00.00.36-00.00.41	narrative
dhərrərndhə	descend	achievement	ATM	b	y	PFV		t				past	SoE CoS	V0-PST V1-PST V2-PST	yirra-lhəka-rnə=ma yirri-dhərrərndhə-nə=ma adalyuma=wa yirri-ngambe-nə=ma yakwujina	REAL.1a-go-PST=MUT REAL.1a-descend-PST=MUT NEUT.river=ALL REAL.1a-swim-PST=MUT there	we went down to swim at the river there	JL, JRB1-007-01, 00.00.36-00.00.41	narrative
lhəka	go	achievement	ATM	closed	y	PFV		t				past		V1-PST	akwala+manja wurra-daduyuwangkwa na-lhəka-nə=ma adalyuma=wa	sometimes 3a-old.woman REAL.3a-go-PST=MUT NEUT.river=ALL	sometimes old women also went to the river	JL, JRB1-007-01, 00.00.42-00.00.51	narrative
lhəka	go	achievement	ATM	closed	y	PFV		t				past		V1-PST=LOC	kemba mining.company na-lhəka-nə=manja arakba yangkwurrangwa	then mining.company 3a-go-PST=LOC compl.act to.here	then when BHP came here	JL, JRB1-007-01, 00.01.15-00.01.20	narrative
lhawurradhə	return	achievement	ATM	b	y	PFV		t				past		V1-PST	biya wurr-ukwala na-lhawurradhə-na	and.then 3a-some REAL.3a-return-PST	[a few of the missionaries stayed here] while others left	JL, JRB1-007-01, 00.01.20-00.01.27	narrative
yadha	arrive	achievement	ATM	b	n	PFV		t				past		V1-PST	n-akən nenəngkwarba ni-yadha-ngə=ma Numbulwar	3m-that 3m.man REAL.3m-arrive-PST=MUT Numbulwar	the man arrived in Numbulwar	JL, JRB1-018-01, 00.02.28-00.02.24	elicitation (translation task)
yadha	arrive	achievement	ATM	b	n	PFV		t				past		V1-PST	ni-yadha-ngə-ma Numbulwar arakba	REAL.3m-arrive-PST=MUT Numbulwar compl.act	he's already got there, to Numbulwar	JL, JRB1-018-01, 00.04.12-00.04.19	elicitation (translation task)
adhərra	pierce; spear	achievement	ATM	b	y	PFV		t				past		V1-PST	yarrungkwa n-akən nenəngkwarba n-adhərra-ngə=ma akwalya	yesterday 3m-that 3m.man REAL.3M>NEUT-spear-PST=MUT NEUT.fish	the man speared the fish	JL, JRB1-018-01, 00.18.25-00.18.35	elicitation (translation task)
abərradhadha	start	achievement	ATM	b	y	PFV		t				past		V1-PST	n-aka nenəngkwarba n-abərradhadha-ngu=ma neni-k-angkarri=yedha	3m.this 3m.man REAL.3m-start-PST=MUT 3m-NSR-run=PURP	the man started to run	JL, JRB1-024-01, 00.20.53-00.21.07	elicitation (video stimuli)
lhəkə	go	achievement	ATM	b	y	PFV		t				past		V1-PST V2-PST	nəmə-lhəke-na arakba makarda=dha narr-am-angka-rnə=ma makina=dha	REAL.VEG-go-PST compl.act VEG-sea=EMPH REAL.3a.O-VEG-fetch-PST=MUT VEG.sea=TRM	It came already to the sea. The sea reached them	A3368a Side1, Chasm Island, 00:02:46.403 - 00:02:49.907	narrative
angka	fetch	achievement	ATM	b	y	PFV		t				past		V0-PST V1-PST	nəmə-lhəke-na arakba makarda=dha narr-am-angka-rnə=ma makina=dha	REAL.VEG-go-PST compl.act VEG-sea=EMPH REAL.3a.O-VEG-fetch-PST=MUT VEG.sea=TRM	It came already to the sea. The sea reached them	A3368a Side1, Chasm Island, 00:02:46.403 - 00:02:49.907	narrative
warde	kill	achievement	ATM	b	y	PFV		t				past		REDUP-V0-PST V1-PST	nen-alhə-lhəkə-nu:::wa, nenu-warda-nga yaraja	REAL3m.du-REDUP-go-PST.XTD REAL3m.du>MASC-hit-PST MASC.goanna	They kept on going (until) they killed a goanna	A3369a Side1, a3.3 Kwurrirda Kwurrirda	narrative
ngbijangə	jump	achievement	ATM	b	n	PFV		t				past		V1-PST	akena ngalh-aja ne-ngbijangə-na	and NEUT.PRO-CofR NEUT-jump-PST	and it jumped	A3369a Side 1 a3.4, Bujikeda ‘Mother cat’	narrative
lhəngaku-warbarrə	long.and.tall-split	achievement	ATM	b	y	PFV		t				past		IN-V1-PST	mu-wilyaba mamarra nəmə-lhəngaku-warbarrə-nə=ma m-akina	VEG-one VEG.small.leaved.paperbark VEG-long.and.tall-split-PST+MUT VEG-that	There was a paperbark that had fallen down	A3369a Side 1 a3.4, Bujikeda ‘Mother cat’	narrative
akuma	put	achievement	ATM	b	n	PFV		t				past		biya-XTD V1-PST	bi:::ya nuw-akuma-rna adhalyəma=manja a-kiyak-bidjina mamədhangkwa=manja	and.then.XTD REAL.NEUT>NEUT-put-PST NEUT.river=LOC NEUT-river-beside VEG.sand=LOC	Then it put the kitten down beside the river on the sand	A3369a Side 1 a3.4, Bujikeda ‘Mother cat’	narrative
ma	take	achievement	ATM	b	n	PFV		t				past		V1-PST	na-ma-nga	REAL.NEUT>NEUT-take-PST	It took another	A3369a Side 1 a3.4, Bujikeda ‘Mother cat’	narrative
rrakbi-yuwiyi-dhə	forehead-straight-INCH	achievement	ATM	b	n	PFV		t				past		V1-PST	abukwaya na-rrakbə-rrakbi-yuwiyi-dhə-na	NEUT.that.coming REAL.NEUT-REDUP-forehead-straight-INCH-PST	it went straight on	A3369a Side 1 a3.4, Bujikeda ‘Mother cat’	narrative
ma	take	achievement	ATM	b	n	PFV		t				past		biya V1-PST	biya na-ma-nga	and.then REAL.NEUT>NEUT-take-PST	and took another	A3369a Side 1 a3.4, Bujikeda ‘Mother cat’	narrative
lhawurradhə	return	achievement	ATM	b	n	PFV		t				past		V1-PST	na-lhawurradhə-na ebina-lhangwiya ngawa	REAL.NEUT-return-PST NEUT.that.same=PERL cont.act	It came back along the same way	A3369a Side 1 a3.4, Bujikeda ‘Mother cat’	narrative
ma	take	achievement	ATM	b	n	PFV		t				past		V0-PST V1-PST	nəngu-ngwarndərra-nga na-ma-ngə=ma akina	REAL.1-not.know-PST REAL.NEUT>NEUT-take-PST=MUT NEUT.that	I didn’t see it take that one	A3369a Side 1 a3.4, Bujikeda ‘Mother cat’	narrative
warde	kill	achievement	ATM	b	y	PFV		t				past		V1-PST	yingu-warda-nga	REAL.3f>NEUT-kill-PST	she killed something	A3369a Side 1 a3.4, Bujikeda ‘Mother cat’	narrative
rreku+wurra	long.and.thin-throw.away	achievement	ATM	b	y	PFV		t				past		V1-PST	nanga-rreku+wurra-ngə=ma angerriba	REAL.FEM>FEM-long.and.thin-throw.away-PST=MUT to.there	then threw it away	A3369a Side1 a3.5, Dingarna-langwa akwa wurruwarda-langwa	narrative
lhəkə	go	achievement	ATM	b	y	PFV		t				past		V0-PST V1-PST	nəm-arəmə-dha-nə-ma arakba makarda nəmə-lhəke-nə-ma	REAL.VEG-big-INCH-PST=MUT compl.act VEG.sea VEG-go-PST=MUT	It (the sea) rose higher now, (the tide) was coming (in)	A3368a Side1, Chasm Island, 00:02:32.410 - 00:02:35.000	narrative
lhəkə	go	achievement	ATM BD DEGREE	relative	y	PFV		t				past		V1-PST	umba wurru-kwala=ba na-jungwee-yi-na	and 3a-some=EMPH REAL.3a-die-RECIP-PST	but others died	A3368a Side1, Chasm Island, 00:02:56.106 - 00:02:59.898	narrative
jungwee-yi	die-RECIP	achievement	ATM GROUP	y	n	PFV		t				past		V0-PST V1-PST	na-ridhi-yi-ne=ka nuw-abardake-yi-ne=ka	REAL.3m>MASC-chop-RECIP-PST=EMPH REAL.3a-get.plenty.of-RECIP-PST=EMPH	They chopped it and gathered lots of honey	A3369a Side1 a3.5, Dingarna-langwa akwa wurruwarda-langwa	narrative
abardake-yi	get.plenty.of; collect	achievement	ATM GROUP	b	y	PFV		t				past		biya many-V1-PST	biya yirr-aja Friday=manja yirru-murndak-akuma-rna money shop=manja=dha	and.then 1a.pro-CofR Friday=LOC REAL.1a>NEUT-many-put-PST NEUT.money NEUT.shop=LOC=TRM	Then on Friday we all did put the money at the shop	A3370a SIDE1 a5.3 Akingambaja-langwa [=About Washing Ceremony]	narrative
akuma	put	achievement	ATM GROUP	b	n	PFV		t				past		V1-PST	kembirra arakba nen-alyubarə-na wənalhakəna=dha	then compl.act REAL.3m.du-eat-PST 3m.du.that=TRM	Then the two of them started eating	A3369a Side1, a3.3 Kwurrirda Kwurrirda	narrative
walka	sneak.up	achievement	ATM PREP	b	y	PFV		t				past	SoE CoS	V1-PST	ngayuwa nganu-walka-nə=ma y-akunə=wa yaraja	1.PRO REAL.1>MASC-sneak-PST=MUT MASC-that=ALL MASC.goanna	he snuck up on the goanna [and grabbed it by the tail]	CW, JRB1-001-01, 00.32.22-00.32.29	elicitation (translation task)

## Sheet: Accomplishments PST
bekə	drink	accomplishment	Q INCR	n	y	PFV?		t				past		akwa V0-∅ arakba V1-PST	akwa n-angkarra-Ø arakba nu-wurda-nga angwarnda=manja abalkaya=dha	and REAL.3M-run-USP COMPL.ACT REAL.3M-climb-PST NEUT.stone=LOC above=TRM	‘And he ran off (and) climbed high on the rocks’	A3368a Side1, Chasm Island, 00:01:38.930-00:01:43.290	narrative
wurda	climb	accomplishment	Q INCR	n	y	PFV		t				past		V1-PST	angurrkwurrikba-wa angerriba angwarnda na-wurdi-yi-na	salt.lake-ALL to.over.there NEUT.stone REAL.3a-climb-RECIP-PST	they climbed the rocks over there near Angurrkwurrikba (Salt Lake)	A3368a Side1, Chasm Island, 00:03:06.311 - 00:03:10.052	narrative
wurda	climb	accomplishment	Q INCR	n	y	PFV		t				past		V1-PST	nenə-lingkarrnga-rna yaraja	REAL.3m.du>MASC-dig-PST MASC.goanna	They dug up a goanna	A3369a Side1, a3.3 Kwurrirda Kwurrirda	narrative
lingkarrnga	dig	accomplishment	Q INCR	n	y	PFV		t				past		V1-PST V2-PST	na-ridhi-yi-ne=ka nuw-abardake-yi-ne=ka	REAL.3m>MASC-chop-RECIP-PST=EMPH REAL.3a-get.plenty.of-RECIP-PST=EMPH	They chopped it and gathered lots of honey	A3369a Side1 a3.5, Dingarna-langwa akwa wurruwarda-langwa	narrative
ridhi	chop	accomplishment	Q INCR	closed	y	PFV		t				past		REDUP-V0-PST V1-PST	n-alhə-lhəke-ne=ka n-akənu:::wa, nu-murndaku-warda-nga	REAL.3m-REDUP-go-PST=EMPH 3m-that.XTD REAL.3m>MASC-many-kill-PST	He kept on walking (until he found) some animals and killed them	A3369a Side1 a3.5, Dingarna-langwa akwa wurruwarda-langwa	narrative
warda	kill	accomplishment	Q INCR	closed	y	PFV		t				past		V1-PST V2-PST	biya na-lhəka-rna arakba wurr-akina na-mədheeyi-na libaliba=ma=dha	and REAL.3a-go-PST compl.act 3a-that REAL.3a-paddle-PST VEG.canoe=INST=EMPH	and they went off, paddling their canoes	A3368a Side1, Chasm Island, 00:00:57.960 - 00:01:00.530	narrative

## Sheet: Atelic dynamic PST
mebi	sing	activity	CUM ACT UBD	n	y	IMPF		t				past		V0-PST V1-PST V2-PST	yarrungkwa n-aka nenəngkwarba nu-kurrudha-ngu=ma ena=lhangwa arəngka akwa nə-mebi-nə-ma emeba akwa nu-wirrmika-rnu=ma	yesterday 3m-this 3m.man REAL.3m-scratch-PST=MUT 3m.PRO.POSS NEUT.head and REAL.3m-sing-PST=MUT NEUT.song and REAL.3m-whistle-PST=MUT		JL, JRB1-024-01, 00.15.19-00.15.58	elicitation (video stimuli)
wirrmika	whistle	activity	CUM ACT UBD	n	y	IMPF		t				past		V-1-PST V0-PST V1-PST	yarrungkwa n-aka nenəngkwarba nu-kurrudha-ngu=ma ena=lhangwa arəngka akwa nə-mebi-nə-ma emeba akwa nu-wirrmika-rnu=ma	yesterday 3m-this 3m.man REAL.3m-scratch-PST=MUT 3m.PRO.POSS NEUT.head and REAL.3m-sing-PST=MUT NEUT.song and REAL.3m-whistle-PST=MUT		JL, JRB1-024-01, 00.15.19-00.15.58	elicitation (video stimuli)
angkarrə	run	activity	CUM ACT UBD	n	y	IMPF		t				past		V1-PST	n-angkarrə-nə=m yeya	REAL.3m-run-PST=MUT MASC.footstep	he was running	JL, JRB1-024-01, 00.18.26-00.18.28	elicitation (video stimuli)
emburrarə	wait	activity	CUM ACT UBD	n	y	IMPF		t				past		V1-PST	yarrungkwa n-akəna nenəngkwarba n-emburrarə-nə=ma n-akinə=wa nu-wilyaba nenəngkwarba	yesterday 3m-that 3m.man REAL.3m-wait-PST=MUT 3m-that=ALL 3m-one 3m.man	yesterday the man was waiting for the other man	JL, JRB1-024-01, 00.14.46-15.42	elicitation (video stimuli)
ngk-arranga	half-cut	activity	CUM ACT UBD	n	y	IMPF		t				past		V1-PST NEG IRR-V2-PST	yarrungkwa n-aka nenəngkwarba ni-ngk-arranga-rnu=ma ayika akena nara ka-kw+arri-na	yesterday 3m-this 3m.man REAL.3m>NEUT-half-cut-PST=MUT NEUT.tree but NEG IRR.3m>NEUT-half+break-PST	yesterday the man was cutting the branch, but it didn't break	JL, JRB1-029-01, 00.06.23-00.06.35	elicitation (video stimuli)
lyelyimbukwe-yi	discuss-RECIP	activity	CUM ACT UBD	n	y	IMPF		t				past		V1-PST	na-lyelyimbukwe-yi-na abərrəwa w-arniniyerringka=wiya=dha	REAL.3a-discuss-RECP-PST 3a.PRO 3a.old.man=QUANT=EMPH	They were talking old people to each other	A3368a Side1, Chasm Island, 00:00:38.705 - 00:00:41.765	narrative
mədheeyi	paddle	activity	CUM ACT UBD	n	y	IMPF		t				past		V0-PST V1-PST	biya na-lhəka-rna arakba wurr-akina na-mədheeyi-na libaliba=ma=dha	and REAL.3a-go-PST compl.act 3a-that REAL.3a-paddle-PST VEG.canoe=INST=EMPH	and they went off, paddling their canoes	A3368a Side1, Chasm Island, 00:00:57.960 - 00:01:00.530	narrative
andaka	hunt	activity	CUM ACT UBD	n	y	IMPF		t				past	Overlap	V1-PST	n-andaka-rnə-ma	REAL.3m>NEUT-hunt-PST=MUT	he was hunting [with a spear]	ST, JRB1-001-01, 00.00.37-00.00.39	elicitation (translation task)
mənandabe	wonder	activity	CUM ACT UBD	n	y	IMPF		t				past		V1-RECIP-PST V2-PST	yirri-mənandabe-yi-nə=ma mena ena akungkwa ne-yukwaja-dhə-nə=ma	REAL.1a-wonder-RECIP-PST=MUT because NEUT.this NEUT.water REAL.NEUT-small-INCH-PST=MUT	we were wondering about this river getting shallow	JL, JRB1-007-01, 00.01.49-00.01.58	narrative
mebi	sing	activity	CUM ACT UBD	n	y	IMPF		t				past		V1-PST	yarrungkwa n-akəna nenəngkwarba nə-mebi-nə=ma emeba	yesterday 3m-that 3m.man REAL.3m-sing-PST=MUT NEUT.song	yesterday the man was singing	JL, JRB1-023-01, 00.07.50-00.07.58	elicitation (video stimuli)
angkarrə	blow; run	activity	CUM ACT UBD	n	n	IMPF		t				past		V1-PST	əmba en-eja n-akwukawura nə-malyumalyangkə-nə=ma n-akəna=dha	but 3f.PRO-CofR 3m-alone REAL.3m-play-PST=MUT 3m-that=TRM	[She kept on sleeping,] but the little boy played all by himself	A3369a Side1, a3.3 Kwurrirda Kwurrirda	narrative
arəmbənadhə	spread	activity	CUM ACT UBD	n	n	IMPF		t				past		V1-PST	m-adhərrungwarnee=ka mamarika nəm-angkarrə-na	VEG-big=EMPH VEG.southeast.wind REAL.VEG-run-PST	A big southeast wind was blowing	A3369a Side 1 a3.4, Bujikeda ‘Mother cat’	narrative
ngurrkwe	hunt	activity	CUM ACT UBD	n	y	IMPF		t				past		V1-PST	ngalhajee=ka angura adhərrungwarnee=ka nuw-arəmbənadhə-na	NEUT.PRO=EMPH NEUT.fire NEUT.big=EMPH REAL.NEUT-spread-PST		A3369a Side 1 a3.4, Bujikeda ‘Mother cat’	narrative
arda	call	activity	CUM ACT UBD	n	y	IMPF		t				past		V1-PST	akena dhə-rnd-arringba dhukwee=ka awilyikerra yingu-ngurrkwe-nə=ma akwalyu=wa=dha	but 3f-mother-3a.KIN maybe=EMPH a.long.way.off REAL.3f-hunt-PST=MUT NEUT.meat=ALL=TRM	Maybe the mother had been hunting a long way for meat	A3369a Side 1 a3.4, Bujikeda ‘Mother cat’	narrative
malyumalyangkə	play	activity	CUM ACT UBD	n	y	IMPF		t				past		kembirra V1-PST	kembirra nuw-arda-ngu=ma dhərnd-arringbu=wa	then REAL.COLL-call.out-PST=MUT 3f.mother-KIN.3a=ALL	that little one was calling out to its mother	A3369a Side1 a3.5, Dingarna-langwa akwa wurruwarda-langwa	narrative
akudhangu-dhə	become.near	scalar achievement	CUM CoS Scal UBD	open	n	IMPF		t				past		V1-PST=TRM	ngalh-aja angura abukwaya nuw-akudhangu-dhə-nə=dha	NEUT.PRO-CofR NEUT.fire NEUT.coming NEUT-near-INCH-PST=TRM	The fire was coming closer	A3369a Side 1 a3.4, Bujikeda ‘Mother cat’	narrative
alyubarə	eat	scalar achievement	CUM CoS Scal UBD	b	y	IMPF		t				past		V1-PST	ambaka+lhangwa na-mənəngka-dhə-nə=ma ena angalya	slowly REAL.NEUT-different-INCH-PST=MUT NEUT.this NEUT.place	slowly this place seems to get different	JL, JRB1-007-01, 00.01.29-00.01.34	narrative
rukwu+lyake	go.around	activity	PLUR ACT UBD	n	n	IMPF		t				past		V1-PST	nu-kwurridhi-jungu-nə-ma	REAL.3m-scratch-REFL-PST=MUT	he was scratching himself	JL, JRB1-023-01, 00.26.52-00.27.02	elicitation (video stimuli)
kwurridhi-jungu	scratch	activity	PLUR ACT UBD	n	y	IMPF		t				past		V1-PST	yarrungkwa n-akəna nəjarrngalya nenu-warda-ngə=ma mardawa-mirriya	yesterday 3m-that 3m.boy REAL.3m>VEG?-kill-PST=MUT VEG.red.ant-the.rest	the boy was killing the ants	JL, JRB1-018-01, 00.23.37-00.23.51	elicitation (translation task)
warde	kill	iterated achievement or hab achievement	PLUR UBD ACH or HAB ACH	dna	n	IMPF		t				past		V1-PST	yarrungkwa ngayuwa nəngə-bekə-nə=ma tea=a	yesterday 1.PRO REAL.1-drink-PST=MUT NEUT.tea=PF	yesterday I drank the tea	JL, JRB1-023-01, 00.13.00-00.13.06	elicitation (video stimuli)

## Sheet: Non-telic CoS PST
ngurrkwa	hunt	activity	BD CUM ACT	n	y	PFV		t				past	SoE CoS	V1-PST	nu-ngurrkwa-nə=ma yimendhu=wa	REAL.3m>3m-hunt-PST=MUT MASC.turtle=ALL	he was hunting turtles [all day]	ST, JRB1-001-01, 00.05.25-00.05.28	elicitation (translation task)
ngurrkwa	hunt	activity	BD CUM ACT	n	y	PFV		t				past	SoE CoS	V0-PST V1-PST	naka nenungkwarba nə-lakə-nə=ma Umbukumbu=wa nu-ngurrkwa-nə=ma yiburadha	3m.this 3m.man REAL.3m-go-PST=MUT Umbakumba=ALL REAL.3m>MASC-hunt-PST=MUT MASC.wallaby	the man went to Umbakumba to hunt wallabies	CW, JRB1-001-01, 00.14.13-00.14.20	elicitation (translation task)
laba	taste	activity	BD CUM ACT	n	y	PFV		t				past	SoE CoS	V1-PST	n-akana nə-laba-nə=ma amadangkwa	3m-that REAL.3m>NEUT-taste-PST=MUT NEUT.meat	he tasted the meat	CW, JRB1-001-01, 00.14.55-00.15.00	elicitation (translation task)
ngambe	swim; bathe	bounded activity	BD CUM ACT	n	y	PFV		t				past	SoE CoS	V-1-PST V0-PST V1-PST	yirra-lhəka-rnə=ma yirri-dirrərndi-nə=ma adalyuma=wa yirri-ngambe-nə=ma yakwujina	REAL.1a-go-PST=MUT REAL.1a-descend-PST=MUT NEUT.river=ALL REAL.1a-swim-PST=MUT there	we went down to swim at the river there	JL, JRB1-007-01, 00.00.36-00.00.41	narrative
wirrəmika	whistle	bounded activity	BD CUM ACT	n	y	PFV		t				past		V0-PST akwa V1-PST	akwa nu-wirrəmika-rnə=ma	and REAL.3m-whistle-PST=MUT	[he was singing] and [then] whistling	JL, JRB1-023-01, 00.23.48-00.23.51	elicitation (video stimuli)
errəngala	itch	bounded activity	BD CUM ACT	n	y	PFV		t				past		V-1-Ø V0-Ø akwa V1-PST	n-aka nenəngkwarba nə-ruk+wulyaka-ja-Ø=ma, nu-rək+wulyaka-ja-Ø anhənga akwa n-errəngala-ng=ma	3M-this 3M.man REAL.3M>NEUT-stir-CAUS-USP=MUT REAL.3M>NEUT-stir-CAUS-USP NEUT.food and REAL.3M-itch-PST=MUT	‘The man stirred the food and ate it and scratched himself'	CW, JRB1-023-01, 00.24.42-00.25.06	elicitation (video stimuli)
kurrudha	scratch	bounded activity	BD CUM ACT	n	y	PFV		t				past		V1-PST V2-PST V3-PST	yarrungkwa n-aka nenəngkwarba nu-kurrudha-ngu=ma ena=lhangwa arəngka akwa nə-mebi-nə-ma emeba akwa nu-wirrmika-rnu=ma	yesterday 3m-this 3m.man REAL.3m-scratch-PST=MUT 3m.PRO.POSS NEUT.head and REAL.3m-sing-PST=MUT NEUT.song and REAL.3m-whistle-PST=MUT	yesterday the man scratched his head, sung a song and whistled	JL, JRB1-024-01, 00.15.19-00.15.58	elicitation (video stimuli)
lubu	hunt	bounded activity	BD CUM ACT	n	y	PFV		t				past		V1-PST	dirnd-enikba akwa naburra-dikba neni-lubu-na yinungungwangba=wa	3f.mother-KIN.3m and 3m.son-KIN.3f REAL.3m.du>MASC-hunt-PST MASC.animal=ALL	A mother and her son went hunting for animals with their dogs	A3369a Side1, a3.3 Kwurrirda Kwurrirda	narrative
yenjala	talk.while.walking	bounded activity	BD CUM ACT	n	y	PFV		t				past		V1-PST	ni-yenjala-nga n-aka lukwakwa ngawa=dha	REAL.3m-talk.while.walking-PST 3m-this on.the.way cont.act=TRM	He kept on and on talking along the way	A3369a Side1, a3.3 Kwurrirda Kwurrirda	narrative
akwuleyi	compete; race	bounded activity	BD CUM ACT	n	y	PFV		t				past		V1-PST V2-PST	ngalh-aja dhərnd-enikba nen-akwuleyi-nə=mərra, yingi-nə-lharrma-ngə=mərra ayika=mərra	3f.PRO-CofR 3f.mother-KIN.3m REAL.3m.du-compete-PST=MUT REAL.3f-3m-chase-PST=MUT NEUT.stick=INST	His mother chased him with a stick	A3369a Side1, a3.3 Kwurrirda Kwurrirda	narrative
lharrma	chase	bounded activity	BD CUM ACT	n	y	PFV		t				past		V0-PST V1-PST	ngalh-aja dhərnd-enikba nen-akwuleyi-nə=mərra, yingi-nə-lharrma-ngə=mərra ayika=mərra	3f.PRO-CofR 3f.mother-KIN.3m REAL.3m.du-compete-PST=MUT REAL.3f-3m-chase-PST=MUT NEUT.stick=INST	His mother chased him with a stick	A3369a Side1, a3.3 Kwurrirda Kwurrirda	narrative
angkarrə	run	bounded activity	BD CUM ACT	n	y	PFV		t				past		V0-PST-XTD V1-PST	n-angkarrə-nə-mərru:::=wa, nu-kwa+bijanga-Ø ayika=manja	REAL.3M-run-PST=MUT.XTD=PL REAL.3M-jump-USP NEUT.tree=LOC	He kept on running (until) he jumped behind a tree	A3369a Side1, a3.3 Kwurrirda Kwurrirda	narrative
dhərrərndhə	descend	bounded activity	BD CUM ACT	n	y	PFV		t				past		REDUP-V1-PST-XTD V2-PST	nen-alhə-lhəkə-nu:::wa, neni-dhərrərndhə-nga, adhalyuma=manja	REAL.3m.du-REDUP-go-PST.XTD REAL.3m.du-descend-PST NEUT.river=LOC	The two of them kept on walking (until) they got down to the river	A3369a Side1, a3.3 Kwurrirda Kwurrirda	narrative
lhəkə	go	bounded activity	BD CUM ACT	n	y	PFV		t				past		REDUP-V0-PST-XTD V1-PST	nen-alhə-lhəkə-nu:::wa, neni-dhərrərndhə-nga, adhalyuma=manja	REAL.3m.du-REDUP-go-PST.XTD REAL.3m.du-descend-PST NEUT.river=LOC	The two of them kept on walking (until) they got down to the river	A3369a Side1, a3.3 Kwurrirda Kwurrirda	narrative
embərrari	wait	bounded activity	BD CUM ACT	n	y	PFV		t				past		V1-PST	en-eja n-akəna nabərra-dhikba ngawa n-embərrari-nə=ma	3m.PRO-CofR 3m-that 3m.son-KIN.3f cont.act REAL.3m-wait-PST=MUT	Her son kept on waiting [until it was cooked]	A3369a Side1, a3.3 Kwurrirda Kwurrirda	narrative
mebi	sing	bounded activity	BD CUM ACT	n	y	PFV		t				past		REDUP-V1-PST-XTD	n-akəna nə-mebə-mebi-nə=mərra ngawa	3m-that REAL.3m-REDUP-sing-PST=MUT cont.act		A3369a Side1, a3.3 Kwurrirda Kwurrirda	narrative
ngwadhə	cry	bounded activity	BD CUM ACT	n	y	PFV		t				past		V0-PST V1-PST	nə-ngwadhə-na kemba nə-ngwadhə-na n-ibəna ngawa arakba	REAL.3m-cry-PST then 3m-cry-PST 3m-this cont.act compl.act	He started crying. And he kept on crying	A3369a Side1, a3.3 Kwurrirda Kwurrirda	narrative
akadha	make.own.sound	bounded activity	BD CUM ACT	n	y	PFV		t				past		V1-PST	erribabe=ka nuw-akadha-ngee=ka enəng-angk-awura	to.here=EMPH REAL.NEUT-make.own.sound-PST=EMPH NEUT.ALP-times-alone	It kept on crackling towards us all the time	A3369a Side 1 a3.4, Bujikeda ‘Mother cat’	narrative
akurraju	look.after	bounded activity	BD CUM ACT	n	y	PFV		t				past		V1-PST	nuw-akurraju-wa a-bə-bərra-dha=dha	REAL.NEUT>NEUT-look.after-PST NEUT-RDP-offspring-3f.KIN=EMPH	it looked after them	A3369a Side 1 a3.4, Bujikeda ‘Mother cat’	narrative
lhəke	go	bounded activity	BD CUM ACT	n	y	PFV		t				past		REDUP-V1-PST V2-PST	n-alhə-lhəke-ne=ka n-akənu:::wa, nu-murndaku-warda-nga	REAL.3m-REDUP-go-PST=EMPH 3m-that.XTD REAL.3m>MASC-many-kill-PST	He kept on walking (until he found) some animals and killed them	A3369a Side1 a3.5, Dingarna-langwa akwa wurruwarda-langwa	narrative
anjirrike-yi	hurry-RECIP	bounded activity	BD CUM ACT	n	y	PFV		t				past		V1-PST V2-PST	arakba ying-anjirrike-yi-na ying-angkarrə-na	compl.act REAL.FEM-hurry-RECIP-PST FEM-run-PST	So she hurried and ran fast	A3369a Side1 a3.5, Dingarna-langwa akwa wurruwarda-langwa	narrative
angkarrə	run	bounded activity	BD CUM ACT	n	y	PFV		t				past		V0-PST V1-PST	arakba ying-anjirrike-yi-na ying-angkarrə-na	compl.act REAL.FEM-hurry-RECIP-PST FEM-run-PST	So she hurried and ran fast	A3369a Side1 a3.5, Dingarna-langwa akwa wurruwarda-langwa	narrative
akadha	bark	bounded activity	BD CUM ACT	n	y	PFV		t				past		V1-PST	ying-akadha-ngə=mərra	REAL.FEM-bark-PST=MUT	She barked	A3369a Side1 a3.5, Dingarna-langwa akwa wurruwarda-langwa	narrative
be-yi	argue-RECIP	bounded activity	BD CUM ACT	n	y	PFV		t				past		V1-PST	adinuba=wiya wurring-alakina Wakaba akwa Dangmiyala narringi-be-yi-na	soon=QUANT 3fdu-those.two Wakaba and Dangmiyala REAL.3fdu-argue-RECIP-PST	At first Wakaba and Dangmiyala had an argument	A3370a SIDE1 a5.3 Akingambaja-langwa [=About Washing Ceremony]	narrative
engkingkirre	think	bounded activity	BD CUM ACT	n	y	PFV		t				past		V1-PST	ying-engkingkirre-na	REAL.3f-think-PST	Then (Wakaba) kept on thinking	A3370a SIDE1 a5.3 Akingambaja-langwa [=About Washing Ceremony]	narrative
lyuwaka	spin	bounded activity	BD CUM ACT	n	y	PFV		t				past		V1-PST	yarna yirre-nu-wurraki-lyuwaka-ju-wa-ma yarnumamalya	1a.this REAL.1a-3m-many-spin-CAUS-PST=MUT 1a.people	then he went all around us	A3370a SIDE1 a5.3 Akingambaja-langwa [=About Washing Ceremony]	narrative
ngwarndərra	not.know	state	BD CUM State NEG	n	n	PFV		t				past		V1-PST V2-PST	nəngu-ngwarndərra-nga na-ma-ngə=ma akina	REAL.1-not.know-PST REAL.NEUT>NEUT-take-PST=MUT NEUT.that	I didn’t see it take that one	A3369a Side 1 a3.4, Bujikeda ‘Mother cat’	narrative
engkərre	listen; hear	bounded activity	BD CUM ACT	n	y	PFV		t				past		V1-PST V2-PST	nəngu-ngwarndərra-nga na-ma-ngə=ma akina	REAL.1-not.know-PST REAL.NEUT>NEUT-take-PST=MUT NEUT.that	I didn’t see it take that one	A3369a Side 1 a3.4, Bujikeda ‘Mother cat’	narrative
lhəkə	go	bounded activity	BD PLUR ACT	closed	y	PFV		t				past		REDUP-V1-PST V2-PST	nen-alhə-lhəkə-nu:::wa, nenu-warda-nga yaraja	REAL3m.du-REDUP-go-PST.XTD REAL3m.du>MASC-hit-PST MASC.goanna	They kept on going (until) they killed a goanna	A3369a Side1, a3.3 Kwurrirda Kwurrirda	narrative
abardake-yi	get.plenty.of; collect	bounded activity	BD PLUR ACT	n	y	PFV		t				past		V1-PST	yiningerribirre=ka yinungungwangba nen-abardake-yi-na	MASC.any.kind=ka MASC.animal REAL.3m.du-get.plenty.of-RECIP-PST	They got lots of animals of all kinds	A3369a Side1, a3.3 Kwurrirda Kwurrirda	narrative
warde	hit	bounded iterated achievement	BD PLUR ACT	dna	y	PFV		t				past		biya V1-PST	biya yingənə-warda-nga ambaka ayika=mərra	and.then REAL.3f>3m-hit-PST then NEUT.stick=INST NEUT.stick	Then she gave him a hiding with a stick	A3369a Side1, a3.3 Kwurrirda Kwurrirda	narrative
mənəngka-dhə	become.different	CoS	INCH ATM	b	n	PFV		t				past		V0-RECIP-PST V1-PST	yirri-mənandabe-yi-nə=ma mena ena akungkwa ne-yukwaja-dhə-nə=ma	REAL.1a-wonder-RECIP-PST=MUT because NEUT.this NEUT.water REAL.NEUT-small-INCH-PST=MUT	we were wondering about this river getting shallow	JL, JRB1-007-01, 00.01.49-00.01.58	narrative
yukwaja-dhə	become.shallow; become.small	CoS	INCH ATM	n	n	PFV		t				past		V1-PST V2-PST	nəm-arəmə-dha-nə-ma arakba makarda nəmə-lhəke-nə-ma	REAL.VEG-big-INCH-PST=MUT compl.act VEG.sea VEG-go-PST=MUT	It (the sea) rose higher now, (the tide) was coming (in)	A3368a Side1, Chasm Island, 00:02:32.410 - 00:02:35.000	narrative
arəmə-dha	get.big; rise	CoS	INCH ATM	b	n	PFV		t				past		V1-PST	akwa nəmə-yalkwudi-na arakba m-akina makarda	and REAL.VEG-become.low.tide-PST compl.act VEG-that VEG.sea	and the tide went out	A3368a Side1, Chasm Island, 00:03:17.506 - 00:03:19.697	narrative
yalkwudi	become.low.tide	CoS	INCH ATM	b	n	PFV		t				past		V1-PST V2-PST	nə-ngwadhə-na kemba nə-ngwadhə-na n-ibəna ngawa arakba	REAL.3m-cry-PST then 3m-cry-PST 3m-this cont.act compl.act	He started crying. And he kept on crying	A3369a Side1, a3.3 Kwurrirda Kwurrirda	narrative
ngwadhə	cry	inchoative activity	INCH ATM	b	y	PFV		t				past		V1-PST arakba	nə-ridha-nga arakba yilyakwa n-akəna=dha	REAL.3m>MASC-chop-PST compl.act MASC.sugarbag 3m-that=TRM	Then he started chopping the sugarbag	A3369a Side1 a3.5, Dingarna-langwa akwa wurruwarda-langwa	narrative
ridha	chop	inchoative pluractional	INCH ATM PLUR	n	y	PFV		t				past		V0-Ø akwa V1-PST	akəna door=a na-ngwudhangma-Ø akwa na-dhəka-jungu-nə=ma	NEUT.that NEUT.door REAL.NEUT-be.open-USP and REAL.NEUT-be.closed-REFL-PST=MUT	‘the door is open, and then it got shut’	JL, JRB1-023-01, 00.01.54-00.02.02	elicitation (video stimuli)
dhəka-jungu	be.closed-REFL	inchoative state	INCH ATM STATE	dna	n	PFV		t				past		V1-PST	na-rukwu-lyəke-na m-akina makarda	REAL.3a-body-spin-PST VEG-that VEG.sea	spinning around in the sea	A3368a Side1, Chasm Island, 00:01:33.130 - 00:01:35.290	narrative

## Sheet: State PST
warriya-dhə	be.sad	state	CUM STATE UBD	dna	n	IMPF		t				past		NI-V1-PST	n-aka nenəngkwarba nu-werrku+warriya-dhə-nə=ma	3m-this 3m.man REAL.3m-chest+sad-INCH-PST=MUT	the man was feeling sad	JL, JRB1-022-01, 00.02.34-00.02.36	elicitation (video stimuli)
ngwədhangma	be.open	state	CUM STATE UBD	n	n	IMPF		t				past		V1-PST	akəna door=a na-ngwədhangmə-nə=ma	NEUT.that NEUT.door=PF REAL.NEUT-be.open-PST=MUT	the door was open	JL, JRB1-022-01, 00.01.24-00.01.29	elicitation (video stimuli)
iki-lyangbadhə	tree-go.across	state	CUM STATE UBD	n	n	IMPF		t				past		IN-V1-PST	nəm-iki-lyangbadhə-nga=ma adhalyəma=manja	REAL.VEG-tree-go.across-PST=MUT NEUT.river=LOC	it (the tree) was lying across the river	A3369a Side 1 a3.4, Bujikeda ‘Mother cat’	narrative
errukulhə	be.sorry	state	CUM STATE UBD	n	y	IMPF		t				past		V1-PST	ngayuwee=ka nəng-errukulhə-nə-mee=ka	1.PRO=EMPH REAL.1-be.sorry-PST=MUT=EMPH	I felt sorry for her	A3369a Side 1 a3.4, Bujikeda ‘Mother cat’	narrative
alharə-dhə	burnt.off.bush-INCH	state	CUM STATE UBD	b	n	IMPF		t				past		V1-PST	ne-kalharə-dhə-na erribaba	REAL.NEUT-burnt.off.bush-INCH-PST to.here	It burnt towards us	A3369a Side 1 a3.4, Bujikeda ‘Mother cat’	narrative
ajirra	wash	Hab Activity	CUMT STATE HAB ACT	n	n	IMPF		t				past	Overlap	V1-PST RED-V2-Ø	narrəma-mərndak-ajirra-ngə=ma dhəmbalha-mərriya narrəma-mərndak-ara-rurrmaja-Ø=ma karrawara amarda-mirriya=manja	REAL.3A>VEG-many-wash-PST=MUT VEG.clothes-the.rest REAL.3A>VEG-many-REDUP-dry-USP=MUT above NEUT.grass-the.rest=LOC	[we used to watch older women at the river] wash their clothes and dry [them] on dry grasses	JL, JRB1-007-01, 00.00.51-00.01.08	narrative
ngurrkwa	hunt	Hab Activity	CUMT STATE HAB ACT	n	y	IMPF		t				past	Overlap	V1-PST	ngayuwa ngə-ngurrukwa-nə-ma dhənungkwulangwa	1.PRO REAL.1>FEM-hunt-PST=MUT FEM.dugong	I used to hunt dugong [when I was young]	CW, JRB1-001-01, 00.07.13-00.07.16	elicitation (translation task)
