# Supplementary material for: Aspectuo-Temporal Underspecification in Anindilyakwa: Descriptive, Theoretical, Typological and Quantitative Issues
Source: Preprints.org preprint supplement (doi:10.20944/preprints202201.0075.v1), 2022-01-06
Supplement: Supplementary file 3 [file real-V-usp-marking-example-corpus-REV4.xlsx]

## Sheet: General sheet - updated
Verb root	Verb root gloss	Aktionsart	Complexity	Scalarity	Control	Viewpoint	Overt present in complex clause/clause chain	Overt Past in complex clause / clause chatn	Asp quantif	Temporal succession	Structural context	Example temporal reading	TA context	Overt TA pattern		Example	Example gloss	Example translation	Example source	Example temporal reading	Genre type of example	REAL-V-USP in construction in example?	Modal reading (if relevant)?	Other notes
adhərrə	spear; pierce	achievement	ATM	b	y	PFV	x	x	x	c	Narr	past	SoE DiscCon	POSS akena V0-∅ biya V1-∅		en=lhang=manja ayerrka akena n-andheya biya n-adharrə-Ø=ma jurra=manja	3M.PRO=POSS=LOC NEUT.hand but 3M-look.around.PST and.then REAL.3M>NEUT-spear-USP=MUT NEUT.book=LOC	‘[he was holding the knife] in his hand, he looked around and then he speared the paper’	JL, JRB1-029-03, 00.07.34-00.07.48	past	elicitation (video stimuli)
adhərrə	spear; pierce	achievement	ATM	b	y	PFV	x	t	x	c	BackFore	past	SoE-PST DiscCon-PST	yarrungkwa V0-PST akwa V1-Ø	Backgr on 1s V 'holding'	yarrungkwa maməwəra=manja n-aka nenəngkwarba nu-wilyaka-Ø=ma lyelyinga akwa n-adharra-Ø jurru=manja	yesterday VEG.day=LOC 3M-this 3M.man REAL.3M>NEUT-hold-PST=MUT NEUT.knife and REAL.3M>NEUT-spear-USP NEUT.paper=LOC	‘yesterday morning the man was holding a knife and speared the paper’	JL, JRB1-029-03, 00.08.53-00.09.09	past	elicitation (video stimuli)
adhərrə	spear; pierce	achievement	ATM	b	y	PFV	x	t	x	c	BackFore	past	SoE-PST DiscCon	V0-PST akwa V1	Backgr on 'holding'	ni-lyinga-Ø=ma akəna lyelyinga en=lhang=manja ayerrka akwa n-adharra-Ø jurra=manja	REAL.3M>NEUT-hold-PST=MUT but NEUT.knife 3M.PRO=POSS=LOC NEUT.hand and REAL.3M>NEUT-spear-USP paper=LOC	‘he was holding the knife in his hand and speared the paper’	JL, JRB1-029-03, 00.09.27-00.09.33	past	elicitation (video stimuli)
adhərrə	spear; pierce	achievement	ATM	b	y	PFV	x	x	x	x	Narr	past	∅?	V1-∅	ach due to object dimensionality	n-adhərra-Ø=m akən jurra n-akən nanəngkwarba	REAL.3M>NEUT-spear-USP=MUT NEUT.that NEUT.paper 3M-that 3M.man	‘The man speared the paper’	ST, JRB1-037-01, 00:22:31-00:22:35	past	elicitation (video stimuli)
adhərrə	spear; pierce	achievement	ATM	b	y	PFV	x	x	x	x	Narr	past	∅?	V1-∅	ach due to object dimensionality	adhuwaba n-akən nanəngkwarba n-adhərra-Ø=m akən jurra lyelyingama	today 3M-that 3M.man REAL.3M>NEUT-spear-USP=MUT NEUT.that NEUT.paper MASC.knife	‘Today the man speared the paper with a knife’	ST, JRB1-037-01, 00:22:55-00:23:00	past	elicitation (video stimuli)
adhərrə	spear; pierce	achievement	ATM	b	y	PFV	x	t	x	c	Narr	past	DiscCon SoE	arakba V1-∅		arakba n-ardhərra-Ø n-akəna akwərrerrikba	COMPL.ACT REAL.3M>NEUT-spear-USP 3M-that NEUT.harpoon	‘Then he grabbed a spear (one of the men took his harpoon)’	Chasm Island, A3368a Side1, 00:01:25.200 - 00:01:28.030	past	narrative
adhərrə	spear; pierce	achievement	ATM	b	y	PFV	x	t	di	cons	Narr	past	Matrix-PST >> TempSub SoE	V0-PST yanda=lhangwa ('until') >> V1-∅		na-rukwu-lyuwake-na yanda=lhangwa nuw-ardhərra-Ø=dha	REAL.3A-body-spin-PST nothing=ABL[until] REAL.3A>NEUT-spear-USP=EMPH	‘It went round and round, until it dropped (in the sea)’	Chasm Island, A3368a Side1, 00:01:35.525 - 00:01:38.025	past	narrative
akburranga	find; reach	achievement	ATM	b	n	PFV	x	t	x	c	Narr	past	SoE-PST DiscCon	V1-PST akena V2-∅		n-aka nenəngkwarba n-aburəngke-nə=ma akena n-ang-akburranga-Ø	3M-that 3M.man REAL.3M-look.for-PST=MUT but REAL.3M-3F-find-USP	‘The man was looking for her, and he found her’	JL, JRB1-064-01, 00.21.11-00.21.17	past	elicitation (flash card stimuli)
akburranga	find; reach	achievement	ATM	b	n	PFV	x	t	x	c	Narr	past	SoE-PST DiscCon	V1-PST akwa V2-∅		n-akəna nenəngkwarba n-abərengke-nə=ma en=lhangwa warijura akwa nen-akbərranga-Ø	3M-that 3M.man REAL.3M>COLL-look.for-PST=MUT 3M.PRO=POSS COLL.child and REAL.3M>COLL-find-USP	‘The man was looking for his kids, and he found them’	JL, JRB1-034-01, 00.21.57-00.22.13	past	elicitation (translation task)
akburranga	find; reach	achievement	ATM	b	n	PFV	x	t	x	p	Narr	past	SoE-PST parataxis	V0-PST V1-∅		narrə-mirku-warrukwa-Ø narrə-m-akbərranga-Ø m-akəna	REAL.3A-neck-cross-PST REAL.3A-VEG-find-USP VEG-that	‘they crossed (a point of land) and they found/reached [it]’	Chasm Island, A3368a Side1, 00:01:19.965-00:01:22.815	past	narrative
akburranga	find; reach	achievement	ATM	b	n	PFV	x	m	x	x	Narr	past	PstMod	yarrungkwa V1-∅		yarrungkwa n-akən nenəngkwarrba nəm-akbərranga-Ø=ma mijiyelya	yesterday 3M-that 3M.man REAL.3M>VEG-find-USP=MUT VEG.beach	‘Yesterday he found the beach’	JL, JRB1-018-01, 00.05.31	past	elicitation (translation task)
akuma	put	achievement	ATM	b	y	PFV	x	x	x	p	Narr	past	SoE parataxis	V1-∅ V2-∅		narrə-m-akuma-Ø libaliba narrə-m-arungku-wurra-Ø	REAL.3A-VEG-put-USP VEG.canoe REAL.3A-VEG-anchor(?)-throw-USP	‘they left the libaliba and they walked (and) threw out the anchors’	Chasm Island, A3368a Side1, 00:01:11.660 - 00:01:15.035	past	narrative
ambarr-nga	stand up	achievement	ATM	b	y	PFV	x	t	x	c	Narr	past	SoE DiscCon-IRR.PST	V-1-∅ akwa V0-∅ akwa kamba V1-∅ V2-∅ V3-IRR-PST	CofS affix +-∅ or did you change your mind? Anin texts is rather: 'he came and sat down, sneezed, then stood up and walked away'	n-akən nanəngkwarba nə-lhəka-Ø=ma n-ambarr-nga=ma akən-manja chair=a akwa nə-mədhilyakbə-Ø-ma akwa kamba nə-kw-aji-nga=ma kənə-lhəka-nə=ma	3M-that 3M.man REAL.3M-go-USP=MUT REAL.3M-sit-CofS=MUT NEUT.that=LOC chair=PF and REAL.3M-cough-USP=MUT and then REAL.3M-half(?)-be.upright-CofS=MUT IRR.3M-go-PST=MUT	‘he stood up, coughed, and walked away’	ST, JRB1-037-01, 00:31:11-00:31:21	past	elicitation (video stimuli)
anga	bite	achievement	ATM	b	y	PFV	x	m	x	x	Narr	past	PstMod	yarrungkwa V1-∅		yarrungkwa wurr-akəna wurruwarda nan-anga-Ø n-akəna nenjarrngalya	yesterday COLL-that COLL.dog REAL.COLL>3M-bite-USP 3M-that 3M.boy	‘Yesterday the dog bit the boy’	ST, JRB1-054-01, 00.13.10-00.13.14	past	elicitation (flash card stimuli)
anga	bite	achievement	ATM	b	y	PFV	x	m	x	x	Narr	past	PstMod	arakbəwiya V1-∅		arakbəwiya wurr-akəna wurruwarda nan-anga-Ø=ma n-akəna nenjarrngalya	long.ago COLL-that COLL.dog REAL.COLL>3M-bite-USP=MUT 3M-that 3M.boy	‘Long time ago the dog bit the boy’	ST, JRB1-054-01, 00.14.11-00.14.18	past	elicitation (flash card stimuli)
anga	bite	achievement	ATM	b	y	PFV	x	m	x	x	Narr	past	PstMod	yarrungkwa V1-∅		yarrungkwa wurr-akəna wurruwarda nan-anga-Ø=mərra n-akən=manja nanjarrngalya	yesterday COLL-that COLL.dog REAL.COLL>3M-bite-USP=MUT 3M-that=LOC 3M.boy	‘Yesterday the dog bit the boy’	ST, JRB1-054-01, 00.12.06-00.12.12	past	elicitation (flash card stimuli)			When considering the difference between nanangama and nanangamərra, and after producing the form nanangamərra several times and apparently acknowledging it, ST says ‘I would never say nanangamərra, never, doesn't sound right to me. Some people might use it, it is used, but I'd prefer to say- I reckon this sounds right [with =ma]. Yarrungkwa wurrakəna wurruwarda nanangama nakəna nenjarrngalya, tha…
angkarrə	run	achievement	ATM	b	y	PFV	x	t	x	cc	BackFore + SoE	past	PST-SoE DiscCon	V0-IRR.PST akena V1-∅ akwa V2-∅	Avertive; 'was going/about to leave' might be closer to the mark	nganyangwa nabə-rraka kənə-lhəka-rni=yedha akena enlhangwa nenmamalya n-angkarr-Ø angaluba dirak=uma akwa ni-yama-Ø ni-yengba-Ø nenu-maka-Ø nungkuwa Ø-ambilya nara a-lhəka-ma	1.PRO.POSS 3M.son-1.KIN IRR.3M-go-PST=PURP but 3M.PRO.POSS 3M.person REAL.3M-run-USP from.over.there VEG.car=INST and REAL.3M-speak-USP REAL.3M-talk-USP REAL.3M>3M-say-USP 2.PRO DEON.2-stay.NPST NEG NEG.NPST-go-NEG.NPST	‘My son nearly left, however a man came from over there in a car and told him “stay, don’t go”’	JL, JRB1-075-01, 00:10:40.510-00:11:02.885	past	elicitation (translation task)
angurrkwuru-da	curve; bend; go.around.corner	achievement	ATM	b	y	PFV	x	x	x	c	Narr	past	LocMod	yadəkəna ('from there') V1-Ø		yadəkəna ngalh-aja n-angurrkwuru-da-Ø angamba biya alyuwangmanja	from.there NEUT.PRO-CofR REAL.NEUT-corner-INCH-USP where and.then place.name	‘from there, they went around the corner, and there that place is Alyuwangmanja’	MM, JRB1-005-01, 00.00.58-00.01.03	past	narrative
arungku-wurra	throw.anchor	achievement	ATM	b	y	PFV	x	x	x	p	Narr	past	SoE parataxis	V0-∅ V1-∅		narrə-m-akuma-Ø libaliba narrə-m-arungku-wurra-Ø	REAL.3A-VEG-put-USP VEG.canoe REAL.3A-VEG-anchor(?)-throw-USP	‘they left the libaliba and they walked (and) threw out the anchors’	Chasm Island, A3368a Side1, 00:01:11.660 - 00:01:15.035	past	narrative
errikbə	throw	achievement	ATM	b	y	PFV	x	x	x	x	Narr	past	SoE DiscCon	V0 akwa V1		n-aka nenəngkwarba nəmə-wilyaka-Ø=ma malarra ayerrk=manja akwa n-errikba-Ø, n-errikbu-Ø=ma	3M.this 3M.man REAL.3M>VEG-hold-PST=MUT VEG.rock NEUT.hand=LOC and REAL.3M-throw-USP REAL.3M-throw-USP=MUT	‘the man was holding the rock in his hand and threw it’	JL, JRB1-029-03, 00.10.43-00.11.06	past	elicitation (video stimuli)
errikbə	throw	achievement	ATM	b	y	PFV	x	x	x	x	Narr	past	∅?	V1-Ø		n-errikbu-Ø-ma malarra	REAL.3M-throw-USP=MUT VEG.rock	‘[he] threw the rock’	ST, JRB1-029-03, 00.12.09-00.12.13	past	elicitation (video stimuli)
errikbə	throw	achievement	ATM	b	y	PFV	x	tm	x	co	BackFore	past	PstMod Overlap-PST SoE DiscCon	V0-PST kembərra V1-∅		n-akəna nanəngkwarba ma-lyinga-Ø m-akən malarra kembərra n-errikbu-Ø-ma	3M-that 3M.man REAL.(3M)>VEG-hold-PST VEG-that VEG.stone then REAL.3M-throw-USP	‘The man was holding the stone and then threw it’	ST, JRB1-037-01, 00:42:52-00:43:01	past	elicitation (video stimuli)
errikbə	throw	achievement	ATM	b	y	PFV	x	tm	x	co	BackFore	past	PstMod Overlap-PST SoE DiscCon	V0-PST akwa V1-∅		n-akəna nenəngkwarba nəm-alyinga-Ø malarra akwa n-errikbu-Ø=ma	3M-that 3M.man REAL.3M>VEG-hold-PST VEG.stone and REAL.3M-throw-USP=MUT	‘The man was holding the stone and he threw it’	CW, JRB1-037-01, 00:43:02-00:43:11	past	elicitation (video stimuli)
errikbə	throw	achievement	ATM	b	y	PFV	x	tm	x	co	BackFore	past	PstMod Overlap-PST SoE DiscCon	yarrungkwa V0-PST V0'-PST akwa V1-∅		yarrungkwa n-aka nanəngkwarba nu-kw-ajey=ma nəm-ayinga-Ø malarra akwa n-errikbu-Ø=ma	yesterday 3M-this 3M.man REAL.3M-half(?)-be.upright.PST=MUT REAL.3M>VEG-hold-PST VEG.stone and REAL.3M-throw-USP=MUT	‘Yesterday the man was standing holding the stone, and threw it’	ST, JRB1-037-01, 00:43:26-00:43:38	past	elicitation (video stimuli)
errikbə	throw	achievement	ATM	b	y	PFV	x	t	x	c	Narr	past	DiscCon SoE DiscCon-PST	akwa arakba V1-∅ V1'-∅ akwa V2-PST		akwa arakba n-errikbə(?)-Ø n-errikbə-Ø akina akwa n-ərrəngka-Ø arakba	and COMPL.ACT REAL.3M>NEUT-throw-USP REAL.3M>NEUT-throw-USP NEUT.that and REAL.3M-look-PST COMPL.ACT	‘and he threw it. He threw it and he saw/watched it (the spear)’	Chasm Island, A3368a Side1, 00:01:28.720 - 00:01:33.075	past	narrative
errikbə	throw	achievement	ATM	b	n	PFV	x	x	x	c	Narr	past	SoE DiscCon	V1-∅ akena V2-∅		n-aka nenəngkwarba n-errikbi-Ø=yedha akəna dart ekena nu-kwiyarrba-Ø	3M-that 3M.man REAL.3M-throw-USP=PURP NEUT.that NEUT.dart but REAL.3M-miss-USP	‘He threw the dart, but missed’	JL, JRB1-075-01, 00:13:52.495-00:13:58.895	past	elicitation (translation task)
jerrədhə	get finished; become finished; be finished	achievement	ATM	b	y	PFV	x	t	rl	cp::	Narr	past	AspMod SoE-PST XTD DiscCon	ngawa (cont.act) V0-XTD-PST eken V1-Ø	not sure about gloss for RED - XTD?	ni-yen-jem-Ø ngaw n-a:::dhərra-Ø=m akən jurra ekena ne-jerrədhə-Ø=m akən jurr- jurra kemba nara=b kən-adhərre-na	REAL.3M-REDUP-do-PST cont.act REAL.3M>NEUT-XTD.pierce-USP=MUT NEUT.that NEUT.paper but REAL.3M-be.finished-USP=MUT NEUT.that NEUT.paper NEUT.paper then NEG=EMPH IRR.3M-pierce-PST	‘He kept on piercing the paper bag, but then he finished, then he didn’t pierce [it] anymore’	ST, JRB1-037-01, 00:25:09-00:25:18	past	elicitation (video stimuli)
jerrədhə	get finished; become finished; be finished	achievement	ATM	b	y	PFV	x	t	x	c	BackFore	past	Overlap-PST DiscCon + AspMod	angkwabəbərn=lhanga ('all day long') V0-PST eken V1-Ø		n-aka nenəngkwarba angkwabəbərn=lhanga n-adhərra-ngu=ma akəna jurra eken nara=ba nə-jerrədha-Ø	3M-that 3M.man all.day=ABL REAL.3M>NEUT-pierce-PST=MUT NEUT.that NEUT.paper but NEG=EMPH REAL.3M-be.finished-USP	‘He was piercing the bag all day, but then he finished’. (what about nara???)	CW, JRB1-037-01, 00:26:14-00:26:26	past	elicitation (video stimuli)
jungwa	die	achievement	ATM	b	n	PFV?	x	x	x	x	Narr?	past	∅? (or SoE parataixis?)	V1-∅		ni-jungwa-Ø	REAL.3M-die-USP	‘that man, he died’	JL, JRB1-049-01, 00.46.49-00.47.01	past	elicitation (translation task)
jungwa	die	achievement	ATM	b	n	PFV?	x	x	x	x	Narr?	past	∅? (or SoE parataixis?)	V1-∅		n-akəna nenəngkwarba ni-jungə-Ø=ma, n-akəna nenəngkwarb ni-jungu-Ø=ma	3M-that 3M.man REAL.3M-die-USP=MUT 3M-that 3M.man REAL.3M-die-USP=MUT	‘he passed away’	JL, JRB1-049-01, 00.47.04-00.47.16	past	elicitation (translation task)
jungwa	die	achievement	ATM	b	y	PFV	x	x	x	c	Narr	past	DiscCon SoE	akena V1-∅		akena n-enəng-arijira=ma ngəwa ni-jungwu-Ø=ma en-ejə-kwaba n-akəna	however 3M-M.ALP-child=PRIV CONT.ACT REAL.3M-die-USP=MUT 3m.PRO-CofR-also 3M-that	‘But he died too, without having any children’	Bible Society in Australia 1992: 822	past	narrative (text translation)
kw+arrangə	cut	achievement	ATM	b	y	PFV	x	m	x	x	BackFore	past	PstMod	yarrungkwa V1-Ø	Backgr on 'holding'	yarrungkwa n-akəna nenəngkwarba nu-wilyaka-Ø=ma a-ki-ngkarrnga en=lhang=manja ayerrka akəna a-ki-ngkarrnga akwa nu-kw+arrangu-Ø=ma amamərarra	yesterday 3M-that 3M.man REAL.3M>NEUT-hold-PST=MUT NEUT-NSR-cut 3M.POSS=LOC NEUT.hand NEUT.that NEUT-NSR-cut and REAL.3M>NEUT-half+cut-USP=MUT NEUT.stick	‘Yesterday the man was holding the knife in his hand and cut the stick’	JL, JRB1-029-01, 00.02.40-00.03.16	past	elicitation (video stimuli)
kw+arrangə	cut	achievement	ATM	b	y	PFV	x	m	x	x	Narr	past	PstMod	yarrungkwa V1-Ø		yarrungkwa n-akəna nenəngkwarba nu-kw+arrangu-Ø=ma amamərarra eyika en=lhangə-ma alhəka	yesterday 3M-that 3M.man REAL.3M>NEUT-half+cut-USP=MUT NEUT.stick NEUT.tree 3M.PRO=POSS=INST NEUT.foot	‘Yesterday the man cut the stick with his foot’	JL, JRB1-029-01, 00.04.18-00.04.37	past	elicitation (video stimuli)
kw+arrangə	cut	achievement	ATM	b	y	PFV	x	m	x	x	Narr	past	PstMod	yarrungkwa V1-Ø		yarrungkwa n-aka nenəngkwarba nu-kw+arrangu-Ø=ma akəna amamərarra ayika en=lhangə=ma alhəka	yesterday 3M-that 3M.man REAL.3M>NEUT-half+cut-USP=MUT NEUT.that NEUT.stick NEUT.tree 3M.PRO=POSS=INST NEUT.foot	‘Yesterday the man cut the stick with his foot’	JL, JRB1-029-01, 00.07.11-00.07.18	past	elicitation (video stimuli)
kw+arrangə	cut	achievement	ATM	b	y	PFV	x	x	x	x	Narr	past	∅?	V1-∅	ach due to object dimensionality	n-akəna nenəngkwarba nu-kw+arrangu-Ø=ma ayika	3M-that 3M.man REAL.3M>NEUT-half+cut-USP=MUT NEUT.tree	‘The man cut the stick’	CW, JRB1-032-01, 00.01.17	past	elicitation (translation task)
kwa+bijanga	jump	achievement	ATM	b	n	PFV	x	t	l	lli	Narr	past	XTD-PST AspMod < SoE	V0-PST:::=wa V1-∅		n-angkarrə-nə-mərru:::=wa, nu-kwa+bijanga-Ø ayika=manja	REAL.3M-run-PST=MUT.XTD=PL REAL.3M-jump-USP NEUT.tree=LOC	‘He kept on running (until) he jumped behind a tree’	GL, A3369a Side1, a3.3 Kwurrirda Kwurrirda	past	narrative
kwiyerrba	miss	achievement	ATM	b	n	PFV	x	x	x	x	Narr	past	SoE parataxis?	V1-∅		n-aka nanəngkwarba nu-kwiyerrba-Ø akəna enungkwa	3M-this 3M.man REAL.3M>NEUT-miss-USP NEUT.that NEUT.spear	‘The man missed the spear’	ST, JRB1-051-01, 00.29.44-00.29.50	past	elicitation (flash card stimuli)
kwiyerrba	miss	achievement	ATM	b	n	PFV	x	x	x	x	Narr	past	∅? SoE parataxis?	V1-∅		n-akən James=a nu-kwiyerrba-Ø y-akəna yimendha	3M-that James=PF REAL.3M>MASC-miss-USP MASC-that MASC.turtle	‘James missed the turtle’	ST, JRB1-051-01, 00.30.23-00.30.34	past	elicitation (flash card stimuli)			When asked what ‘nakəna nenəngkwarba nukwiyerrba yakəna yimendha’ means, ST replies ‘that man missed the turtle’. Then asked following up ‘so missed? in the past?’ ST says ‘missed, yeah’.
kwiyerrba	miss	achievement	ATM	b	n	PFV	x	x	x	c	Narr	past	DiscCon SoE	V0-∅ akena V1-∅		n-aka nenəngkwarba n-errikbi-Ø=yedha akəna dart ekena nu-kwiyarrba-Ø	3M-that 3M.man REAL.3M-throw-USP=PURP NEUT.that NEUT.dart but REAL.3M-miss-USP	‘He threw the dart, but missed’	JL, JRB1-075-01, 00:13:52.495-00:13:58.895	past	elicitation (translation task)
larrka	send	achievement	ATM	b	y	PFV	x	x	x	x	Narr	past	SoE (parataxis?)	V1-∅	ABL plays a role?	narri-larrka-Ø angaluba ayakwa Umbakumba=lhangwa	REAL.3A>NEUT-send-USP from.there NEUT.language Umbakumba=ABL	‘Then from Umbakamba the people send a message from there’	Akingambaja-langwa [=About Washing Ceremony], A3370a SIDE1 a5.3	past	narrative
lekbu	blame	achievement	ATM	b	y	PFV	x	x	x	x	Narr	past	∅?	V1-∅	verbum dicendi = achievement	n-aka nanəngkwarba nen-lekbu-Ø=ma n-aka nenjarrngalya	3M-that 3M.man REAL.3M>3M-blame-USP=MUT 3M-that 3M.boy	‘the man accused the boy’	ST, JRB1-051-01, 00.19.41-00.20.01	past	elicitation (translation task)
lekbu	blame	achievement	ATM	b	y	PFV	x	x	x	x	Narr	past	∅?	V1-∅	verbum dicendi = achievement	nen-lekbu-Ø=ma	REAL.3M>3M-blame-USP=MUT	‘he accused him’	ST, JRB1-051-01, 00.19.41-00.20.01	past	elicitation (translation task)
lharrə	fall	achievement	ATM	b	y	PFV	x	x	x	x	Narr	past	∅?	V1-∅		n-akəna nenəngkwarba nə-lharra-Ø	3M-that 3M.man REAL.3M-fall-USP	‘that man fall down’	JL, JRB1-049-01, 00.40.50-00.40.56	past	elicitation (video stimuli)
lyumadhə	disappear	achievement	ATM	b	n	PFV	x	x	x	x	Narr	past	SoE parataxis?	V1-∅		yarrungkwa n-akəna nenəngkwarba ni-lyumadhə-Ø=ma	yesterday 3M-that 3M.man REAL.3M-disappear-USP=MUT	‘He disappeared’	JL, JRB1-050-01, 00.27.52-00.27.59	past	elicitation (flash card stimuli)
lyumadhə	disappear	achievement	ATM	b	n	PFV	x	t	l	lli	Narr	past	XTD-RED-PST < SoE	V0-RED-PST:::=wa V1-∅		nanga-lhuku-lhukwa-mərrkaju-wa dh-adhə-m-alhəka=lhangwiyu:::=wa yingə-lhəkarrkə-lyəmadha-Ø	REAL.3M>3F-REDUP-tracks-follow-PST 3F-F-INALP-foot=PERL.XTD=PL 3F-tracks-disappear-USP	‘He kept following her tracks until they disappeared’	GL, A3374a Side2, a11.2 Search	past	narrative
marrakaja	grab; take	achievement	ATM	b	y	PFV	x	x	x	x	Narr	past	∅? (but SoE context)	V1-∅		dhədharrəngka yingi-na-marrakaja-Ø akən amdejika	3F.woman REAL.3F-3M-grab-USP NEUT.that NEUT.thing	The woman grabbed the thing from him	ST, JRB1-037-02, 00:14:39-00:14:45	past	elicitation (video stimuli)
marrakaja	grab; take	achievement	ATM	b	y	PFV	x	m	x	x	Narr	past	PstMod	arakb-ərakbəwiya V1-∅		arakb-ərakbəwiya dh-akəna dhədharrəngka yingə-nə-marrakaja-Ø=ma n-akə nanəngkwarba akən ayika	REDUP-long.ago 3F-that 3F.woman REAL.3F-3M-grab-USP=MUT 3M-that 3M.man NEUT.that NEUT.tree	‘Long time ago the woman grabbed the stick from the man’	ST, JRB1-037-02, 00:16:30-00:16:43	past	elicitation (video stimuli)
məra+junga-ja	wake.up.someone	achievement	ATM	b	y	PFV	x	x	x	c	Narr	past	DiscCon SoE	biya V1-Ø		biya n-aka nu-wilyab nenəngkwarba nen-məra+junga-ja-Ø=ma	and.then 3M-this 3M-one 3M.man REAL.3M>3M-wake.up-CAUS-USP=MUT	‘and then he woke him up’	ST, JRB1-029-03, 00.23.31-00.23.38	past	elicitation (video stimuli)
məra+junga-ja	wake.up.someone	achievement	ATM	b	y	PFV	x	t	x	c	BackFore	past	Back-Fore-PST Overlap-PST DiscCon	V0-PST akena V1-∅	Backgr on 'sleeping'	n-aka nenəngkwarba nə-rrak-ajey-mə=na ni-jungu-nə-ma marrnga chair=manja akena nu-wilyaba nenəngkwarba nenu-məra+janga-ja-Ø=ma	3M-this 3M.man 3M-?-be.upright.PST=MUT=TAG REAL.3M-be.tired-PST=MUT VEG.sleep NEUT.chair=LOC but 3M-one 3M.man REAL.3M>3M-wake.up-CAUS-USP=MUT	the man was sleeping in the chair, but the [other] man woke him up’	JL, JRB1-029-03, 00.24.50-00.25.13	past	elicitation (video stimuli)
məra+junga-ja	wake.up.someone	achievement	ATM	b	y	PFV	x	x	x	x	Narr	past	∅?	V1-Ø		n-akəna nu-wilyaba nenəngkwarba nen-məra+janga-ja-Ø=ma	3M-that 3M-one 3M.man REAL.3M>3M-wake.up-CAUS-USP=MUT	‘the man woke him up’	ST, JRB1-029-03, 00.25.58-00.26.04	past	elicitation (video stimuli)
nekibulu	give.up	achievement	ATM	b	y	PFV	x	x	x	c	Narr	past	SoE DiscCon	arakbəwiya V0-∅ kemba V1-∅	PC realis!	arakbəwiya n-aka nenəngkwarba nu-njurr-kwa-ja-Ø=ma akəna fridge=a ekena engkəbərrungwərrungwa or kamba ngə-nekibulu-Ø=m akəna	long.ago 3M-this 3M.man REAL.3M>NEUT-move-CAUS-USP=MUT NEUT.that NEUT.fridge=PF but NEUT.heavy then REAL.3M>NEUT(?)-give.up(?)-USP=MUT NEUT.that	Long time ago the man [tried to] move the fridge, but it was too heavy’ / ‘and so he gave up’	JL, JRB1-038-01, 00:14:43-00:15:08	past	elicitation (video stimuli)
nekibulu	give.up	achievement	ATM	b	y	PFV	x	t	x	co	BackFore	past	Overlap-PST SoE DiscCon	arakbəwiya V-1-IRR-PST akwa V0-IRR-∅ ekena V1-∅		arakbəwiya n-aka nenəngkwarba kənu-jura-ng=yedha akwa kənu-njurru-kwa-ji-Ø=yedh akəna fridge=a ekena nə-nekibula-Ø akwa=ba ə-mdh-akeya=wiya	long.ago 3M-that 3M.man IRR.3M>NEUT-push-PST=PURP and IRR.3M>NEUT-move-CAUS-USP=PURP NEUT.that NEUT.fridge=PF but REAL.3M>NEUT(?)-give.up(?)-USP and=EMPH NEUT-many-that(?)=QUANT	‘Long time ago the man was [trying to] push and move the fridge, but he gave up'	JL, JRB1-038-01, 00:16:14-00:16:34	past	elicitation (video stimuli)
ngambaja	curse(someone/something)	achievement	ATM	b	y	PFV	x	t	ld	c lli	Narr	past	DiscCon-XTD-PST SoE	V0-PST biya:::V1-∅ V2-PST	V0-PST bi:::ya V1-∅	ying-engkəngkərre-na ngalhamba=lhangwa akəna=murradha dh-akəna Wakaba bi:::ya, ngalamba=lhangwa arakba yingənə-ngambaja-Ø dh-akəna yingən-ararika-Ø dhambulu=ma n-akəna	REAL.3F-think-PST 3F.PRO.SEQ=POSS NEUT.that=EMPH 3F-that Wakaba and.then.XTD 3F.PRO.SEQ=POSS COMPL.ACT REAL.3F>3M-curse-USP 3F-that REAL.3F>3M-tie.up-PST NEUT.feather.string=EMPH 3M-that	‘Then Wakaba kept on thinking, then it was her turn, she cursed Nenungwanjirrumiya, she cursed him to the feather string and that feather string had been tied all around him’	Akingambaja-langwa [=About Washing Ceremony], A3370a SIDE1 a5.3	past	narrative
ngk+arrangə	cut	achievement	ATM	b	y	PFV	x	m	x	x	Narr	past	PstMod	yarrungkwa V1-Ø		yarrungkwa n-aka nenəngkwarba ni-ngk+arrənga-Ø nu-kw+arrangu-Ø-ma ni-ngk+arrnga-rnu-ma ene=lhangwa	yesterday 3M-that 3M.man REAL.3M>NEUT-?+cut-USP REAL.3M>NEUT-?+cut-USP=MUT REAL.3M>NEUT-?+cut-USP=MUT 3M.PRO=POSS	‘Yesterday the man cut [the stick with] his foot’	JL, JRB1-029-01, 00.08.01-00.08.23	past	elicitation (video stimuli)
ngkə+lharrə	fall	achievement	ATM	b	y	PFV	x	x	x	x	Narr	past	∅?	V1-∅		n-akəna nenəngkwarba ni-ngkə+lharra-Ø	3M-that 3M.man REAL.3M-?+fall-USP	‘The man fell down’	JL, JRB1-049-01, 00.41.12-00.41.19	past	elicitation (translation task)			JL asked and does that [nakəna nenəngkwarba nəlharra] mean it happened now, or it happened before?’, JL replies ‘happened before’
ngkə+lharrə	fall	achievement	ATM	n	y	PFV	x	t	x	c	BackFore	past	Overlap-PST SoE DiscCon	V0-PST akena V1-∅		n-akəna nenəngkwarba n-angkarrə-nə=manja, n-aka nenəngkwarba n-aka n-aka nenəngkwarba n-əngkarre-na akena ni-ngkə+lharra-Ø karrawara amamərarra=manja ayika	3M-that 3M.man REAL.3M-run-PST=LOC 3m-this 3M.man 3M-this 3M-this 3M.man REAL.3M-run-PST but REAL.3M-?+fall-USP above NEUT.branch=LOC NEUT.tree	‘When the man was running, he fell on the tree branch’	JL, JRB1-033-01, 00.06.11-00.06.46	past	elicitation (translation task)
ngkə+lharrə	fall	achievement	ATM	n	y	PFV	x	t	x	c	BackFore	past	Overlap-PST SoE DiscCon	V0-PST akena V1-∅		n-angkarrə-nə=manja akena ni-ngkə+lharra-Ø karrawara amamərarra-manja ayika	REAL.3M-run-PST=LOC but REAL.3M-?+fall-USP above NEUT.branch=LOC NEUT.tree	‘When he was running, he fell on the tree branch’	JL, JRB1-033-01, 00.07.00-00.07.14	past	elicitation (translation task)
ngkə+lharrə	fall	achievement	ATM	n	y	PFV	x	x	x	x	Narr	past	∅?	V1-∅		n-angaba nenəngkwarba ni-ngkə+, ni-ngkə+lharra-Ø, ni-ngkə+lharrə-Ø=ma	3M-that.one 3M.man 3M-?+, REAL.3M-?+fall-USP REAL.3M-?+fall-USP=MUT	‘The man fell down’	JL, JRB1-049-01, 00.41.50-00.41.55	past	elicitation (translation task)			In response to being asked ‘if I'm falling down and right now you're saying 'James...’ Then asked for clarification, JL is asked ‘if someone says nəlharra it's- he fell down? he's already on the ground?’ and JL replies ‘he f- he fell down, yeah’
ngkə+lharrə	fall	achievement	ATM	b	n	PFV	x	x	x	x	Argu Epist	past	EpistMod	dhukwa V1-∅		dhukwa ne-ngkə+lharra-Ø dhukwa nara akənə=wa dhu nəw-kw-ajiya	maybe REAL.NEUT-?+fall-Ø maybe NEG NEUT.that=ALL maybe REAL.NEUT-half(?)-be.upright.NPST	‘Maybe the tree fell down, maybe it didn’t, maybe it’s still standing’	JL, JRB1-042-01, 00:15:35-00:15:59	past	elicitation (translation task)		epistemic
ngwanja	stop	achievement	ATM	b	n	PFV	x	x	x	lli	Narr	past	SoE DiscCon + XTD	V-1-PST V0-PST biya Npred-XTD V1-∅		wurru-kwala na-jungwee-yi-nə=dha ne-yamin-jamə-na biya yelyukwi::: arrərra nu-ngwanja-Ø	3A-some REAL.3A-die-RECIP-PST=TRM REAL.3M-REDUP-do-PST and.then MASC.rain.XTD NEUT.wind REAL.NEUT-stop-USP	‘(but) some died. until the rain and wind’	Chasm Island (A3368a Side1), 00:03:11.880-00:03:17.458	past	narrative
rama-jungwa	get.up	achievement	ATM	n	y	PFV	x	tm	x	c	Narr	past	PstMod + SoE-PST DiscCon-PST	yarrungkwa V-1-PST V0-PST akwa V1-∅ akwa V2-PST		yarrungkwa n-aka nenəngkwarba nə-lhəke-na akwa na-mak+ajey=ma chair=manja akwa na-rama-jungwa-Ø akwa nu-kwa+bijangu-nə=ma	yesterday 3M-that 3M.man REAL.3M-go-PST and REAL.3M-place+be.upright.PST=MUT chair=LOC and REAL.3M-get.up-REFL-USP and REAL.3M-jump-PST=MUT	‘Yesterday the man went and sat in the chair, and then got up and jumped’	CW, JRB1-032-01, 00.33.22	past	elicitation (video stimuli)
warde	hit; kill	achievement	ATM	b	n	PFV	x	x	x	x	Narr	past	SoE parataxis?	V1-∅		n-akəna nenəngkwarba nenu-warda-Ø, nenu-warda-Ø wurr-aka wurruwarda nenu-warda-Ø wurr-aka wurruwarda	3M-that 3M.man REAL.3M>COLL-hit-USP REAL.3M>COLL-hit-USP COLL-that COLL.dog REAL.3M>COLL-hit-USP COLL-that COLL.dog	‘that man hit the dog’	JL, JRB1-049-01, 00.46.19-00.46.29	past	elicitation (translation task)
warma-jungwa	rise; get.up; fly.away	achievement	ATM	n	y	PFV	x	tt	x	c	Narr	past	SoE DiscCon-PST	V1-∅ akwa V2-PST akwa V3-PST		wurr-akəna wurru-kwulyubena wurruweba nəw-warma-jungwa-Ø ajurungka=lhangwa akwa na-rak-wulyake-na akwa nə-lhawrradhə-na	COLL-that COLL-pretty COLL.parrot REAL.COLL-fly.away-RELF-USP NEUT.ground=ABL and REAL.COLL-round-go.around-PST and REAL.COLL-return-PST	‘The pretty parrot took off from the ground, flew round and round, and then came back’	JL, JRB1-033-01, 00.16.39-00.17.04	past	elicitation (video stimuli)
wurra	throw	achievement	ATM	b	y	PFV	x	x	x	x	Narr	past	SoE parataxis?	V1-∅		malamukwa=wiya numa-wurra-Ø arrawa=lhangwa əmba nara n-ibina nenumamalya	VEG.dugout.canoe=QUANT REAL.3M>VEG-throw.away-USP inside=ABL but NEG 3M-this 3M.person	‘But he only threw out the canoe from underneath, he wasn't there’	JL, A3369b Side1, a4.4 Malamukwa-langwa ‘About canoe accident’	past	narrative
yakwabijə	forget	achievement	ATM	b	n	PFV	x	x	x	x	Argu Epist	past	EpistMod	dhukwa V1-∅		dhukwa ni-yakwabijə-Ø=ma ngalhanga dh-adhə-m-ikirra	maybe REAL.3M-forget-USP=MUT 3F.PRO.POSS 3F-F-INALP-name	‘he probably forgot her name’	anin2_pw_au_004, in van Egmond 2012: 232	past	elicitation (translation task)		epistemic
yedha	arrive	achievement	ATM	b	n	PFV	x	x	d	cons	Narr	past	SoE AspMod	V1-∅ wərənjabə=wiya ('after a quick time')		ni-yedha-Ø yakwuju wərənjabə=wiya	REAL.3M-arrive-USP there quickly=QUANT	‘He got there quick’	JL, JRB1-082-02, 00:16:21.559-00:16:26.409	past	elicitation (translation task)
yengbə	talk, say	achievement	ATM	dna	y	PFV	x	t	x	c	Narr	past	PST-SoE DiscCon	V-1-IRR.PST akena V0-∅ akwa V1-∅	Avertive; 'was going/about to leave' might be closer to the mark	nganyangwa nabə-rraka kənə-lhəka-rni=yedha akena enlhangwa nenmamalya n-angkarr-Ø angaluba dirak=uma akwa ni-yama-Ø ni-yengba-Ø nenu-maka-Ø nungkuwa Ø-ambilya nara a-lhəka-ma	1.PRO.POSS 3M.son-1.KIN IRR.3M-go-PST=PURP but 3M.PRO.POSS 3M.person REAL.3M-run-USP from.over.there VEG.car=INST and REAL.3M-speak-USP REAL.3M-talk-USP REAL.3M>3M-say-USP 2.PRO DEON.2-stay.NPST NEG NEG.NPST-go-NEG.NPST	‘My son nearly left, however a man came from over there in a car and told him “stay, don’t go”’	JL, JRB1-075-01, 00:10:40.510-00:11:02.885	past	elicitation (translation task)
yerraka-ja	make.ashamed; tell.off	achievement	ATM	b	y	PFV	x	t	x	co	BackFore	past	Overlap-PST SoE DiscCon	V1-0-PST biya V1-∅		wurr-akəna wurr-ambilyuma wurri-yukwuja-kiya na-bey-nu-ma biya neba-rrəngba neni-yerraka-ja-Ø=ma	COLL-that COLL-two COLL-small-two REAL.3A-argue-PST=MUT and.then 3M.uncle-3A.KIN REAL.3M>3A-ashamed-CAUS-USP=MUT	‘The two kids were quarrelling, and then their uncle told them off’	JL, JRB1-034-01, 00.05.36-00.06.00	past	elicitation (translation task)
ngkə+lharrə	fall	achievement	ATM	n	y	PFV	x	t	x	c	BackFore	past	Overlap-PST SoE DiscCon	V0-PST akwa V1-∅	clause chaining	n-akəna nenəngkwarba nə-majuwa-rnə-ma akwa ni-ngkə+lharra-Ø karrawara amamərarra=manja ayika	3M-that 3M.man REAL.3M-walk-PST-MUT and REAL.3M -?+fall-USP above NEUT.branch=LOC NEUT.tree	‘The man was walking along, and he fell on the tree branch’	JL, JRB1-033-01, 00.02.11-00.02.28	past	elicitation (translation task)
akburranga	find; reach	achievement	ATM GROUP	b	n	PFV	x	t	l	lli	Narr	past	XTD-PST AspMod < SoE	V0-PST:::=wa V1-∅		na-lhəke-nə-ma=ka wurr-akənu:::=wa, yandha+lhangwa narr-akburranga-Ø ebina angalya Kenina	REAL.3A-go-PST=MUT=EMPH 3A-that.XTD=PL until REAL.3A-reach-USP NEUT.this NEUT.place place.name	‘They went on and on, until they reached Canaan’	Bible Society in Australia 1992: 187	past	narrative (text translation)
akburranga	find; reach	achievement	ATM GROUP	b	y	PFV	x	x	x	c	Narr	past	SoE DiscCon	biya V1-∅		biya Nabali=lhangwa=manja angalya nen-akburranga-Ø	and.then Nabali=POSS=LOC NEUT.place REAL.3A>3M-find-USP	‘Then at Nabali's place they all found him’	Akingambaja-langwa [=About Washing Ceremony], A3370a SIDE1 a5.3	past	narrative
akuma	put	achievement	ATM GROUP	b	n	PFV	x	x	x	c	Narr	past	DisCon SoE DiscCon	ngarningka V0-PST biya V1-∅	non-atomic because of 5	ngarningka nə-lbu-lburra-nga ngəwa biya, amangbalha n-akuma-Ø	again REAL.3M-REDUP-split-PST continue and.then NEUT.five REAL.3M>NEUT-put-USP	Again he (chopped down a tree and) split it and made another five (spear shafts)	AA, A3369a Side2, a3.11 Yingarna-langwa ‘Story about a snake’	past	narrative
anga	bite	achievement	ATM GROUP	dna	y	PFV	x	x	x	cons	BackFore / Explanation	past	Matrix-PR >> V-∅=ABL (= because)	V0-NPST >> V1-∅=ABL		na-rrangkuwangə-na=ma ayarrka dhəmərrmara ng-anga-Ø=mərrə=lhangwa	REAL.NEUT-swell-NPST=MUT NEUT.hand FEM.sandfly REAL.FEM>1-bite-PST=DEP=ABL	‘My hand is swelling up because the sandflies bit me’	Stokes n.d.-b: 117	past	elicitation (translation task)
angmadhə	steal	achievement	ATM GROUP	dna	y	PFV	x	t	x	x	Narr	past	Matrix-PST >> ObjCl-∅	V0-PST >> V1-∅		nara ka-rrəngka-Ø wurr-enjarrngalyilya nuw-angmadhə-Ø=mərrə=mərra nganyangwa diraka	NEG IRR.1>3A-see-PST 3A-boy REAL.3A>NEUT-steal-USP=DEP=PROP 1.PRO.POSS NEUT.car	‘I didn’t see the boys who stole my car’	Stokes n.d.-b: 97	past	elicitation (translation task)
jerrədhə	get finished; become finished; be finished	achievement	ATM GROUP	b	y	PFV	x	t	x	cclit	Narr	past	TempSub << Matrix SoE-PST DiscCon PST	yarrungkwa V1-Ø=lhangwa V2-PST akwa V3-PST		yarrungkwa na-jerrədhə-Ø=ma school=a up at the school, yah na-jerrədhə-Ø=ma s- na-jarrə-Ø=mə=lh- na-jerrədhə-Ø=mə=lhangwa school-a wurr-a wurri-yukwujiya na-malyangke-nə=ma akwa nə-lhəwrradhə-na	yesterday REAL.3A-be.finished-USP=MUT NEUT.school=PF REAL.3A- be.finished-USP=MUT REAL.3A- be.finished-USP=MUT=ABL REAL.3A- be.finished-USP=MUT=ABL NEUT.school-a 3A-this 3A-small REAL.3A-play-PST=MUT and REAL.3A-return-PST	‘Yesterday after they finished at school, the kids played and then went home’	JL, JRB1-033-01, 00.28.42-00.29.09	past	elicitation (video stimuli)
njurrkwa-ja	move	activity bounded/inchoative activity	ATM or ACTIVITY BD	n	y	PFV	x	t	x	c	Narr	past	SoE-PST DiscCon	V0-PST akwa V1-Ø		n-aka nenəngkwarba ni-jəra-ng=ma akwa ni-njurrkwa-ja-Ø=m akən fridge=a	3M-this 3M.man REAL.3M>NEUT-push-PST=MUT and REAL.3M>NEUT-move-CAUS=USP=MUT NEUT.that NEUT.fridge=PF	‘The man pushed and moved the fridge’	ST, JRB1-038-01, 00:07:50-00:07:58	past	elicitation (video stimuli)	REAL-push-PST=MUT + akwa + REAL-move-CAUS=USP=MUT
njurrkwa-ja	move	activity bounded/inchoative activity	ATM or ACTIVITY BD	n	y	PFV	x	tm	x	c	Narr	past	PstMod + SoE-PST DiscCon	yarrungkwa V0-PST akwa V1-Ø		n-akəna nanəngkwarba yarrungkwa ni-jara-ngu=ma akwa ni-njurrkwa-ja-Ø=ma akən fridge	3M-that 3M.man yesterday REAL.3M>NEUT-push-PST=MUT and REAL.3M>NEUT-move-CAUS=USP=MUT NEUT.that NEUT.fridge	‘Yesterday the man pushed and moved the fridge’	ST, JRB1-038-01, 00:08:17-00:08:27	past	elicitation (video stimuli)	REAL-push-PST=MUT + akwa + REAL-move-CAUS=USP=MUT
njurrkwa-ja	move	activity bounded/inchoative activity	ATM or ACTIVITY BD	n	y	PFV	x	t	x	c	Narr	past	SoE-PST DiscCon	V0-PST akwa V1-Ø		n-akəna nenəngkwarba ni-jura-ngu=ma akwa ni-njurrkwa-ja-Ø=ma akəna fridge=a	3M-that 3M.man REAL.3M>NEUT-push-PST=MUT and REAL.3M>NEUT-move-CAUS=USP=MUT NEUT.that NEUT.fridge=PF	‘The man pushed and moved the fridge’	JL, JRB1-038-01, 00:09:07-00:09:17	past	elicitation (video stimuli)	REAL-push-PST=MUT + akwa + REAL-move-CAUS=USP=MUT
njurrkwa-ja	move	activity bounded/inchoative activity	ATM or ACTIVITY BD	n	y	PFV	x	tm	x	c	Narr	past	PstMod + SoE-PST DiscCon	arakbəwiya V0-PST akwa V1-Ø		arakbəwiya n-akəna nenəngkwarba ni-jura-ngu=ma akwa ni-njurrkwa-ja-Ø=ma akəna fridge	long.ago 3M-that 3M.man REAL.3M>NEUT-push-PST=MUT and REAL.3M>NEUT-move-CAUS=USP=MUT NEUT.that NEUT.fridge	‘Long time ago the man pushed and moved the fridge’	JL, JRB1-038-01, 00:09:22-00:09:32	past	elicitation (video stimuli)	REAL-push-PST=MUT + akwa + REAL-move-CAUS=USP=MUT
njurrkwa-ja	move	activity bounded/inchoative activity	ATM or ACTIVITY BD	n	y	PFV-Weak	x	t	x	c	Narr	past	SoE-PST DiscCon	V0-PST akwa V1-Ø		n-akəna nenəngkwarba ni-jura-ngu=ma akwa nu-njurr-kwa-ja-Ø=ma akəna- akəna fridge=a akena nara=dha	3M-that 3M.man REAL.3M>NEUT-push-PST=MUT and REAL.3M>NEUT-move-CAUS=USP=MUT NEUT.that- NEUT.that NEUT.fridge=PF but NEG=TRM	‘The man pushed and [tried to] move the fridge, but nothing’	JL, JRB1-038-01, 00:12:39-00:13:00	past	elicitation (video stimuli)	REAL-push-PST=MUT + akwa + REAL-move-CAUS=USP=MUT	frustrative
njurrkwa-ja	move	activity bounded/inchoative activity	ATM or ACTIVITY BD	n	y	PFV	x	tm	x	c	Narr	past	SoE DiscCon-PST + PstMod	adhuwaba V1-∅ akwa V2-PST		adhuwaba n-aka nanəngkwarba ni-njurrkwa-ja-Ø=ma akwa ni-jəra-ng=m akən fridge	today 3M-that 3M.man REAL.3M>NEUT-move-CAUS-USP=MUT and REAL.3M>NEUT-push-PST=MUT NEUT.that NEUT.fridge	‘Today the man moved and pushed the fridge’	ST, JRB1-038-01, 00:08:35-00:08:42	past	elicitation (video stimuli)	REAL-move-CAUS=USP=MUT + akwa + REAL-push-PST=MUT
njurrkwa-ja	move	bounded iterated activity	ATM or ACTIVITY BD	n	y	PFV-Weak	x	tm	i	p	Narr	past	PstMod + SoE-PST DiscCon + RED.echo	V-1-PST V0-PST akwa V1-Ø	PC - weak perfective	yarrungkwa n-akəna nenəngkwarba nu- ni-jura-ngu=ma- ni-jura-ngu=ma akən fridge=a akwa nə-njurrukwa-ja-Ø=ma ekena nara engkəbarrungwarrungwa akəna	yesterday 3M-that 3M.man REAL.3M>NEUT-push-PST=MUT REAL.3M>NEUT-push-PST=MUT NEUT.that NEUT.fridge=PF and REAL.3M>NEUT-move-CAUS=USP=MUT but NEG NEUT.heavy NEUT.that	‘Yesterday the man pushed the fridge and [tried to] move [it], but nothing, it was too heavy’	JL, JRB1-038-01, 00:13:47-00:14:06	past	elicitation (video stimuli)	REAL-push-PST=MUT + akwa + REAL-move-CAUS=USP=MUT	frustrative
yedha	arrive	achievement	ATM PREP	b	y/n	PFV	x	t	x	cc	Narr	past	DiscCon SoE DiscCon-PST	biya V1-∅ arakba (then) V2-PST		biya ni-yadha-Ø nungw-enikba akwa yakwujina arakba nuw-ambilya adhalyuma=manja wurr-akəna=dha	and.then REAL.3M-arrive-USP 3M.father-KIN.3M and there COMPL.ACT REAL.3A-stay.PST NEUT.river=LOC 3A-that=TRM	‘And then his father arrived and they all stayed there at the river’	Kwurrirda Kwurrirda-langwa, A3369a Side1 a3.3	past	narrative
ngaja	hunt (down)	achievement	ATM PREP	b	y	PFV	x	t	x	c	Narr	past	SoE DiscCon-PST	V1-∅ akwa V2-PST V3-PST		n-aka nenəngkwarba nə-ngaja-Ø=ma yiburadha akwa ni-lhəka-rna angaly=uwa nə-dhaka-Ø=ma	3m-this 3M.man REAL.3M-hunt-USP=MUT MASC.wallaby and REAL.3M-go-PST NEUT.place=ALL REAL.3M>MASC-cook-PST=MUT	‘The man hunted the wallaby, went home, and cooked it’	JL, JRB1-034-01, 00.07.21-00.07.35	past	elicitation (translation task)
walka	sneak.up	achievement	ATM PREP	b	y	PFV	x	m	x	x	Narr	past	PstMod	arakba=wiya V1-∅		arakba=wiya yukwujə=wiya ngayuwa ngayuwa ngenu-walka-Ø-ma nganyangwa nganamjamjerrka	COMPL.ACT=QUANT little=QUANT 1.PRO 1.PRO REAL.1>3M-sneak-USP=MUT 1.PRO.POSS 3M.grandfather	‘Long time ago the child snuck up on my grandad’	CW, JRB1-001-01, 00.34.39-00.34.51	past	elicitation (translation task)
yedha	arrive	achievement	ATM PREP	b	y	PFV	x	t	x	x	Narr	past	PstMod	yarrungkwa V1-Ø		yarrungkwa n-akəna nenəngkwarba ni-yadhə-Ø=ma	yesterday 3M-that 3M.man REAL.3M-arrive-USP=MUT	‘He arrived yesterday’	JL, JRB1-018-01, 00.02.59-00.03.08	past	elicitation (translation task)
yedha	arrive	achievement	ATM PREP	b	y	PFV	x	x	x	x	Narr	past	∅	V1-Ø		n-akən nenəngkwarba ni-yadhə-Ø=ma Numbulwaru=manja	3M-that 3M.man REAL.3M-arrive-USP=MUT place.name=LOC	‘He arrived at Numbulwar’	JL, JRB1-018-01, 00.03.32-00.03.36	past	elicitation (translation task)
engkərrka	think; listen	activity	CUM	n	y	IMPFV	x	t	x	c	Backgr	past	SoE-PST DiscCon	V0-PST akwa V1-∅		n-akən James=a n-ardi-nga-ma n-abən nenəngkwarba akwa n-engkərrka-Ø	3M-that James=PF REAL.3M-call.out-PST=MUT 3M-that 3M.man and REAL.3M-listen-USP	‘James called out to that boy, and he listened’	ST, JRB1-054-01, 00.22.57-00.23.06	past	elicitation (translation task)
ngemba	bathe	activity	CUM	n	y	PFV?	x	m	x	x	Narr?	past	PstMod	adhuwaba V1-∅		adhuwaba n-akəna nenəngkwarba nə-ngemba-Ø mijiyely=manja	today 3M-that 3M.man REAL.3M-bathe-USP VEG.beach=LOC	‘that man, he swam at the beach’	JL, JRB1-050-01, 00.06.52-00.07.02	past	elicitation (flash card stimuli)
ngurrkwa	hunt	activity	CUM	n	y	IMPFV	x	x	h	x	Narr? Backgr?	past	∅? Hab?	V1-Ø	Impossible to judge out of context	nu-ngurrkwa-Ø=m yimendhə=wa	REAL.3M-hunt-USP=MUT MASC.turtle=ALL	‘He hunted turtles’	CW, JRB1-001-01, 00.04.56-00.04.58	past	elicitation (translation task)
angkarrə	run	activity bounded	CUM BD	dna	n	PFV	x	t	x	p	Narr	past	SoE-PST parataxis	V1-Ø V2-PST akwa V3-PST		y-aka yirrburrbula n-angkarra-Ø m-əkəna [nu?]ma-jama-Ø akəna wall=a akwa [nə?]-nguwanjə-n=dha	MASC-this MASC.ball REAL.MASC-roll-USP VEG-that REAL.VEG-do-PST NEUT.that NEUT.wall= PF and REAL.NEUT(?)-stop-PST=TRM	‘The ball rolled hit the wall and stopped’	ST, JRB1-034-01, 00.16.53-00.17.00	past	elicitation (translation task)
angkarrə	run	activity bounded	CUM BD	dna	y	PFV	x	t	x	c	Narr	past	SoE DiscCon-PST	akwa V1-∅ arakba V2-PST n-ərribərriba		akwa n-angkarra-Ø arakba nu-wurda-nga angwarnda=manja abalkaya=dha	and REAL.3M-run-USP COMPL.ACT REAL.3M-climb-PST NEUT.stone=LOC above=TRM	‘And he ran off (and) climbed high on the rocks’	Chasm Island, A3368a Side1, 00:01:38.930-00:01:43.290	past	narrative
ngərraja	argue.about	activity bounded	CUM MAX	n	y	PFV	x	t	d	p	Narr	past	AspMod.DiscCon-PST SoE	adhənuba=wiya ('after a short time') V0-PST V1-∅ V2(=V1)-∅	Re-iteration/reformulaiton of PST V	adhənuba=wiya wurrəng-alhəkina Wakaba akwa Dangmiyala narrəngi-be-yi-na narra-lhərrakə-ngərraja-Ø, nenənga-ngərraja-Ø Stella n-akəna=lhangwa Nenungwanjirrumiya=lhangwa dhadhingiy-enikba	soon=QUANT 3F.DU-those.two Wakaba and Dangmiyala REAL.3F.DU-argue-RECIP-PST REAL.3F.DU>3A-internal.organs(?)-argue.about-USP REAL.3F.DU>3A-argue.about-USP Stella 3M-that=POSS Nenungwanjirrumiya=POSS 3F.wife-3M.KIN	‘At first Wakaba and Dangmiyala had an argument, they both argued over them two, they argued over Stella the wife of Nenungwanjirrumiya’	Akingambaja-langwa [=About Washing Ceremony], A3370a SIDE1 a5.3	past	narrative
mebi	sing	activity bounded	CUM MAX	dna	y	PFV	x	x	x	x	Narr?	past	∅?	V1-∅	Translation suggests a transitive reading. Rather more like a bounded activity?	n-akəna nenəngkwarba nə-mebu-Ø=ma	3M-that 3M.man REAL.3M-sing-USP=MUT	‘he sang a song’	JL, JRB1-049-01, 00.25.23-00.25.50	past	elicitation (translation task)			JL: ‘he sang a song, nəmebuma, nəmebuma, it's singing. Yeah, that man is singing, yeah nakəna nenəngkwarba nəmebuma, he was singing, yeah, he [is] singing, like he's singing now, nakəna nenəngkwarba nəmebuma’; JL doesn’t like this form as much as others such as nəmebinəma
mebi	sing	activity bounded	CUM MAX	dna	y	PFV	x	x	x	x	Narr?	past	∅?	V1-∅ + Obj		arnkawura n-akəna nenəngkwarba nə-mebu-Ø=ma emeba	one.day 3M-that 3M.man REAL.3M-sing-USP=MUT NEUT.song	‘he sang a song’	JL, JRB1-049-01, 00.27.36-00.28.02	past	elicitation (translation task)			JL: ‘like to me, I heard that man, he was singing, so arnkawura nakəna nenəngkwarba nəmebuma emeba, nəmebuma, he was like sing- he [is] singing, I heard him singing, so nəmebuma, yeah, numebuma, I heard him singing, he was s- I heard him singing a song, so nəmebuma’
angkarrə	run	activity max	CUM MAX	b	y	PFV	x	x	dil	lli	Narr	past	XTD-SoE AspMod	V1-∅:::=wa V2-∅		yingi-rukwulyaka-Ø ying-angkarru-Ø:::=wa, ying-arjiyi-nga akuwabijina awurukwa	REAL.3F-go.around-PST REAL.3F-fly-Ø.XTD=PL REAL.3F-stand-CofS beside NEUT.billabong	‘She flew down and circled round and round (until) she was standing at the edge of the billabong’	GL, A3369a Side1, a3.7 Nimimba-langwa akwa nenikuwenikba-langwa ‘The blind man’	past	narrative
ngərraja	argue.about	activity max	CUM MAX	b	y	PFV	x	tm	d	p	Narr	past	AspMod.DiscCon-IRR.PST SoE parataxis (> DiscCon)	adhənuba ('soon') V-2-IRR-PST(AVERT) V-1-IRR-PST V0-PST V1-∅ V2-PST V3-PST	ongoing argument presented as at once averted and ongoing => unfinished argument?	yakwujine=ka adhənuba ka-wardi-yi-nə=ma wurr-akəna akəna karri-ngirra-ju-wa=ma, narri-ngərrajə-Ø=ma dhambula akəna narr-arriyaka-Ø=ma akəna ne-yama-Ø wurru-wurr-akuwarra ka-wardi-yi-nə=me=ka adhənuba akəna yanda ngawa narra-yangki-yangk-arringa-rna	there=EMPH soon IRR.3A-hit-RECIP-PST=MUT COLL-that NEUT.that IRR.3A-argue.about-CAUS-PST=MUT REAL.3A-argue.about-USP=MUT FEM.feather.string NEUT.that REAL.3A-make.mistake-PST=MUT NEUT.that REAL.3A-say-PST 3A-REDUP-half IRR.3A-hit-RECIP-PST=MUT=EMPH soon NEUT.that only CONT.ACT REAL.3A-REDUP-voice-break-PST	‘Soon they were just about to fight over the feather string, they were arguing over it, they all said some made a mistake and half of the people nearly had a fight but some of the people had stopped them’	Akingambaja-langwa [=About Washing Ceremony], A3370a SIDE1 a5.3	past	narrative
wara	refuse.to	neg.state	CUM STATE	dna	?	IMPFV	x	t	x	p	BackFore (Explanation) + V-PST	past	Overlap-PST SoE parataxis	V1-∅ V2-PST		yingu-wara-Ø raja, nanga-kwa-Ø anhənga angakəna-mərriya yilyakwa, yimumarnda ying-ayiji-na nenga-beka-ju-wa cup=mərra tea yingu-bekə-na, neni-yemin-jema-Ø nen-amb-ambilyu:::=wa, nenu-mungkwula	REAL.3F-refuse.to-USP NEUT.rice REAL.3M>3F-give-PST NEUT.food whats.it.called-the.rest MASC.sugarbag MASC.freshwater.turtle REAL.3F-stand-PST REAL.3M>3F-drink-CAUS-PST NEUT.cup=INST NEUT.tea REAL.3F-drink-PST REAL.3M.DU-REDUP-do-PST REAL.3M.DU-REDUP-stay.PST.XTD=PL REAL.3M.DU-sleep.PST	‘She didn’t want it [the rice] and so he gave her the food and the sugarbag and water turtles and she ate it and gave her a cup of tea and she drank the tea. They both kept on staying there and both went to sleep’	BB, A3370a Side1, a5.8 Diyaburaka-langwa	past	narrative
aburiya	be.stuck	state	CUM STATE	n	n	IMPFV	x	x	x	c	Backgr	past	DiscCon TempShift	arakba V1-∅		arakba wurri-rn-dhirnd-arrngwa iya wurr-akəna wurru-ngwu-ngw-arrngwa na-wurrak-aburiya-Ø arakba arrawu=wa	COMPL.ACT 3A.REDUP(?)-mother-3A.KIN and 3A-that 3A-REDUP(?)-father-3A.KIN REAL.3A-many-be.stuck-USP COMPL.ACT underneath=ALL	‘their mothers and fathers were stuck in the ground’	JL, A3369b Side1, a4.2 Jigagwa-langwa-langwa daburradikba akwulyangburarrka ‘Her daughter’s dream’	past	narrative
abuwalya	be.hungry.for.meat	state	CUM STATE	b/open scale	n	IMPFV	x	t	x	c	Explanation	past	Matrix-PST >> DiscCon CausSub Backgr	biya NOM-EVT arakba, V0-PST V1-Ø=baba ('because V1')		biya nenə-mərnda-kə-lhalhəka wurradhədiyuwangkwa arakba, nə-lhəke-na nə-lhəbi-nə=dha n-abuwalya-Ø=baba=dha	and.then REAL.3M>3A-many-NSR-leave 3A.old.women COMPL.ACT 3M-go-PST REAL.3M-hunt-PST=TRM REAL.3M-hungry.for.meat-USP=REAS=TRM	‘Then he left the old ladies and he went hunting because he was hungry for meat’	Dingarna-langwa akwa wurruwarda-langwa, A3369a Side1 a3.5	past	narrative
alyadhə	hang	state	CUM STATE	n	n?	IMPFV	x	m	x	x	Backgr	past	PstMod	V1-Ø		n-alyadhə-Ø=ma	REAL.3M-hang-USP=MUT	‘he hung’ (in response to prompt ‘so if we say yarrungkwa nakəna nenəngkwarba...’)	JL, JRB1-022-01, 00:04:18-00:04:20	past	elicitation (video stimuli)
jelalu	hang; hang.out; hang.down	state	CUM STATE	n	n	IMPFV	x	t	x	x	Backgr	past	Rel -PST	Rel:V0-PST V1-∅	akwa V1-∅	akəne=ka dhambula yirr-andheyu=ma nena-ka-rarika-Ø=me=ka memurruma=lhangwa akwa angerriba nenumamalyu=wa na-murndaka-jelalu-Ø=ma	NEUT.that=EMPH NEUT.feather.string REAL.1A-look.for.PST=MUT REAL.3M.DU(?)>NEUT-NSR-tie.up-PST=MUT=EMPH VEG.back.of.neck=ABL and to.there 3M.people=ALL REAL.COLL-many-hang.out-USP=MUT	‘That feather string that we saw had been all tied around from his neck and down to his body, they were all hanging down’	Akingambaja-langwa [=About Washing Ceremony], A3370a SIDE1 a5.3	past	narrative
ngiyendha	want	state	CUM STATE	dna	y	IMPFV	x	t	x	x	Backgr	past	Matrix-∅ >> ObjSub Pst IRR	V1-∅ V2-∅=PURP (wanted to V2)	past irrealis	ngaya ngi-yendha-Ø=ma k-angkarrə-Ø=m=yedhə yedhəkən yedhəkba=lhangwiya	1.PRO REAL.1-want-USP=MUT IRR.1-run-USP=MUT=PURP from.there Emerald.River=PERL	‘I wanted to run along Emerald River’	JL, JRB1-044-01, 00:07:21-00:07:25	past	elicitation (translation task)
ngiyendha	want	state	CUM STATE	dna	y	IMPFV	x	t	x	x	Backgr	past	Matrix-∅ >> ObjSub Pst IRR	V1-∅ V2-IRR-∅ (wanted to V2)	past irrealis	n-akəna n-eni-ngendha-Ø-m n-akəna n-enukw-enukba n-enu ku-radha-Ø dh-akəna ayika	3M-that REAL.3M.S-3M.O-want-USP=MUT 3M-that 3M-son-3M.KIN 3M-this IRR.3M-chop-USP 3F-that NEUT.tree	‘He wanted his son to chop down the tree’	JL, JRB1-044-01, 00:34:42-00:34:48	past	elicitation (translation task)
radha	chop	state	CUM STATE	dna	y	IMPFV	x	t	x	x	Backgr	past	Matrix-∅ >> ObjSub Pst IRR	V1-∅ V2-IRR-∅ (wanted to V2)	should not be in the sample - past irr utterance, not a past indicative	n-akəna n-eni-ngendha-Ø-m n-akəna n-enukw-enukba n-enu ku-radha-Ø dh-akəna ayika	3M-that REAL.3M.S-3M.O-want-USP=MUT 3M-that 3M-son-3M.KIN 3M-this IRR.3M-chop-USP 3F-that NEUT.tree	‘He wanted his son to chop down the tree’	JL, JRB1-044-01, 00:34:42-00:34:48	past	elicitation (translation task)
angburadha	get.tired.of(something); become.tired.of(something)	CofS	INCH ATM	b	n	PFV	x	t	x	cc	Narr	past	DiscCon SoE DiscCon-PST	arakba V1-Ø akwa V2-PST V3-Ø ('went V3')		ngalh-aje=ka arakba ying-angburadha-Ø dhərndh-enikba akwa yingə-mungkulha yingə-mungkulhi-nga	3F.PRO-CofR=EMPH COMPL.ACT REAL.3F-get.tired-USP 3F.mother-KIN.3M and REAL.3F-sleep.PST REAL.3F-sleep-CofS	‘His mother got tired of him and went to sleep’	Kwurrirda Kwurrirda-langwa, A3369a Side1 a3.3	past	narrative
enibu-dhə	be.alive; become.alive	CofS	INCH ATM	b	n	PFV	x	x	x	x	Narr	past	SoE parataxis?	V1-∅		n-eniba-dhə-Ø=ma	REAL.3M-alive-INCH-USP=MUT	‘He came back to life’	JL, JRB1-077-01, 00:44:54.310-00:44:57.730	past	elicitation (translation task)
lharrumur-dha	become.dark	CofS	INCH ATM	b	n	PFV	x	m	d	cons	Narr	past	PstMod+AspMod	wurdarriya+wiya ('until morning') V1-∅	possibly lexified INCH?	na-lharrumurdha-Ø nenə-mungkwulha wurdarriya+wiya	REAL.NEUT-dark-PST REAL.3M.DU-sleep.PST morning+QUANT	‘It became dark and they slept until morning’	Bible Society in Australia 1992: 502	past	narrative (text translation)
lharruwura-dha	be.late.afternoon; become.late.afternoon	CofS	INCH ATM	b	n	PFV	x	x	x	c	Narr	past	SoE DiscCon	biya V1-∅	non ambiguous because of biya	biya na-lharruwura-dha-Ø arakba	and.then REAL.NEUT-afternoon-INCH-USP COMPL.ACT	‘It was late afternoon’ [i.e. it had already become late afternoon]	Bible Society in Australia 1992: 174	past	narrative (text translation)
lharruwura-dha	be.late.afternoon; become.late.afternoon	CofS	INCH ATM	b	n	PFV	x	x	x	c	Narr	past	DiscCon SoE	kembirra V1-∅		kembirra na-lharruwura-dha-Ø arakba	then REAL.NEUT-afternoon-INCH-USP COMPL.ACT	‘Afternoon came’ [and then the sun began to set]	Bible Society in Australia 1992: 624	past	narrative (text translation)
wangkwa-dhə	become.old	CofS	INCH ATM	b	n	PFV	x	x	x	x	Narr	past	SoE parataxis?	V1-∅		n-eni-wangkwa-dhə-Ø=ma	REAL.3M-M-man-INCH-USP=MUT	‘He became an old man’ [speaker translation]	JL, JRB1-077-02, 00:03:31.138-00:03:34.828	past	elicitation (translation task)
yakwurra	be.thirsty; get.thirsty	CofS	INCH ATM	b	n	PFV	x	m	x	x	Narr	past	PstMod	V1-∅ alyarrəngwalyilya ('that night')		ni-yakwurra-Ø n-akəna akungwa alyarrəngwalyilya	REAL.3M-be.thirsty-USP 3M-that NEUT.water NEUT.night	‘He got thirsty [for water] during the night’	Stokes n.d.-b: 26	past	elicitation (translation task)
rriya-dha	be.sulky; get.sulky	CofS	INCH ATM	b	n	PFV	x	x	x	c	Narr	past	SoE DiscCon	biya V1-∅	Fore on previous V ; not clear if subject starts sulking then or not	biya enamba=lhangwa Arrama ni-lyangi-rriya-dha-Ø	and.then 3M.PRO.SEQ=POSS Arrama REAL.3M-head-bad-INCH-USP	‘Then it was Arrama's turn, he was sulky’	Akingambaja-langwa [=About Washing Ceremony], A3370a SIDE1 a5.3	past	narrative
walyuwu	be.cooked; get.cooked; be.ripe; get.ripe	CofS/state	INCH ATM	closed max	n	PFV	x	x	x	c	Narr	past	DiscCon+XTD SoE	bi:::ya V1-∅		bi:::ya nu-walyuwu-Ø-manji=kba=dha, y-akina yimarndakuwaba y-inumalye=ka=dangba	and.then.TXD REAL.3M-be.cooked-USP=LOC=DENIZ=TRM MASC-that MASC.blue.tonged.lizard MASC-good?=EMPH=EMPH	‘When at last that blue-tongued lizard was cooked to perfection, it was the fattiest, juiciest blue-tongued lizard that ever was’	Kwurrirda Kwurrirda-langwa, A3369a Side1 a3.3	past	narrative
angkarrə	run	inchoative activity = achievement	INCH ATM	dna	y	PFV	x	t	x	c	BackFore	past	PstMod + Overlap-PST SoE DiscCon	yarrungkwa V-2-PST V-1-PST V0-PST biya V1-∅	Fore on 'run'	yarrungkwa n-akən ni-yukwujiya na-rrak-ajey=m akwa nəm-arr-abərrəngka-Ø=ma m-arrakwəyabe-nə=ma maməwura biya wurr-akən wurruwarda nəw-angkarrə-Ø=m enəwa=wa	yesterday 3M-that 3M-small REAL.3M-forehead-stand.PST=MUT and REAL.3M>VEG-REDUP-look-PST=MUT REAL.VEG?-rise-PST=MUT VEG.sun and.then COLL-that COLL.dog REAL.COLL-run-USP=MUT 3M.PRO=ALL	‘Yesterday the boy was sitting and watching the sun rise, and then the dog ran up to him’	ST, JRB1-034-01, 00.04.17-00.04.27	past	elicitation (translation task)
angkarrə	run	inchoative activity = achievement	INCH ATM	dna	y	PFV	x	t	x	c	BackFore	past	Overlap-PST SoE DiscCon	V0-PST akena V1-Ø	Back on 1st V	nu-ngurrkwa-rnə=ma yiburadh=uwa akena n-angkarra-Ø	REAL.3M>MASC-hunt-PST=MUT MASC.wallaby=ALL but REAL.MASC-run-USP	‘[The man] was hunting the wallaby, but it ran away’	ST, JRB1-034-01, 00.06.53-00.07.01	past	elicitation (translation task)
angkarrə	run	inchoative activity = achievement	INCH ATM	b	y	PFV	x	x	x	p	Narr	past	SoE-RED parataxis	V0-RED-∅ V1-∅		na-lhawu-lhawurradh-Ø, nuw-angkarra-Ø	REAL.NEUT-REDUP-return-USP REAL.NEUT-run-USP	‘It [the mother cat] kept going back, it ran off’	GL, A3369a Side 1 a3.4, Bujikeda ‘Mother cat’, 00.07.28-00.07.32	past	narrative
engkərrka	think; listen	inchoative activity = achievement	INCH ATM	n	y	PFV	x	t	x	c	Narr	past	SoE-PST DiscCon	V0-PST akwa V1-∅		ngayuwa ng-arda-ngu-ma James=wa akwa n-engkərrka-Ø	1.PRO REAL.1-call.out-PST=MUT James=ALL akwa REAL.3M-listen-USP	‘I called out to James, and he listened’	ST, JRB1-054-01, 00.23.45-00.24.05	past	elicitation (translation task)			(in response to ‘could we also say nakəna James-a ningkərrka? [enenuwiya]’ where ST replies ‘no, no, if I was calling out to you I'd use that sentence, ngayuwa ngardanguma James-wa akwa nengkərrka’)
lhəka	go	inchoative activity = achievement	INCH ATM	n	y	PFV	x	t>>	x	p	Narr	past	SoE DiscCon >> IRR.PST	V1-Ø V2-CofS-Ø akwa V3-Ø akwa V4-Ø >> V5-IRR-PST	Is V1 V2 a case of SVC?	n-akən nanəngkwarba nə-lhəka-Ø=ma n-ambarr-nga=ma akən-manja chair=a akwa nə-mədhilyakbə-Ø-ma akwa kamba nə-kw-aji-nga=ma kənə-lhəka-nə=ma	3M-that 3M.man REAL.3M-go-USP=MUT REAL.3M-sit-CofS=MUT NEUT.that=LOC chair=PF and REAL.3M-cough-USP=MUT and then REAL.3M-half(?)-be.upright-CofS=MUT IRR.3M-go-PST=MUT	‘he stood up and walked away’	ST, JRB1-037-01, 00:31:11-00:31:21	past	elicitation (video stimuli)
ruk+wulyaka-ja	stir; spin; turn.around	activity	PLUR ACT	n	y	PFV? IMPFV?	x	m	x	x	Narr? Backgr?	past	PstMod	yarrungkwa V1-Ø		yarrungkwa n-akəna ni-yuwkujiya nə-ruk+wulyaka-ja-Ø-ma	yesterday 3M-that 3M.small REAL.3M>NEUT-stir-CAUS-USP=MUT	‘Yesterday the boy turned [the wheel] around’	JL, JRB1-023-01, 00.37.20-00.37.28	past	elicitation (video stimuli)
ruk+wulyaka-ja	stir; spin; turn.around	activity	PLUR ACT	n	y	PFV? IMPFV?	x	m	x	x	Narr? Backgr?	past	PstMod	yarrungkwa V1-Ø		yarrungkwa n-akəna niyukwujiya nəmə-ruk+wulyaka-ja-Ø=ma mijiyanga	yesterday 3M-that 3M.small REAL.3M>VEG-stir-CAUS-USP=MUT VEG.boat	‘Yesterday the boy turned the [wheel of the] boat around’	JL, JRB1-024-01, 00.07.44-00.07.58	past	elicitation (video stimuli)
njurrkwa-ja	move	iterated activity	PLUR ACT	n	y	PFV? IMPFV?	x	tm	di	it	Narr? Backgr?	past	IterationV-PST + PstMod	mamawura ('day') lharrma-PST V1-∅	larrma or lharrma? + Translation	n-akəna nenəngkwarba nəma-larrma-ngu-ma mamawura ni-jara-ngu=ma or ni-njurrkwa-ja-Ø=ma akəna fridge	3M-that 3M.man REAL.3M>VEG-do.all.day- PST=MUT VEG.day REAL.3M>NEUT-push-PST=MUT REAL.3M>NEUT-move-CAUS-USP=MUT NEUT.that NEUT.fridge	‘The man was pushing and moving the fridge all day’	JL, A JRB1-038-01, 00:10:29-00:10:37	past	elicitation (video stimuli)
dhakba-jangu	grind; knock [+REFL]	semelfactive	PLUR ACT	dna	y	PFV?	x	x	i	it	Narr?	past	IterPred	V1-∅ ngəwa ('continue') keep.on		n-aka nanəngkwarba na-dhakba-jangu-Ø=m door=man ngəwa n-ərribərrib=dha	3M-that 3M.man REAL.3M-knock-REFL-USP=MUT NEUT.door=LOC CONT.ACT 3M-keep.on=TRM	‘The man kept on knocking on the door’	ST, JRB1-037-02, 00:18:25-00:18:32	past	elicitation (video stimuli)
dhakba-jangu	grind; knock [+REFL]	semelfactive	PLUR ACT	dna		PFV?	x	x	i	cit	Narr?	past	IterPred + SoE DiscCon	V1-∅ n-ərribərriba (3keep.on) biya V2-∅		n-aka nanəngkwarba n-adhakba-jangu-Ø=ma yerrkam- ayerrka=ma akən=men door=a n-ərribərriba biya n-aka nanəngkwarba n-angkarrə-Ø=m yedhakənaya	3M-that 3M.man REAL.3M-knock-REFL-USP=MUT NEUT.hand=INST NEUT.that=LOC NEUT.door=PF 3M-keep.on and.then 3M-that 3M.man REAL.3M-run-USP=MUT that.way	‘The man kept on knocking with his hand on the door, and then the other man ran past’	ST, JRB1-037-02, 00:19:08-00:19:18	past	elicitation (video stimuli)
dhakba-jangu	grind; knock [+REFL]	semelfactive	PLUR ACT	dna	y	IMPFV	x	tm	x	co	Backgr	past	PstMod SoE DiscCon-PST	adhuwaba V1-∅ biya V2-PST	There is something off in the translation here, given the follow up event in the past. 'adhuwaba' is actually a recent past	n-aka nanəngkwarba adhuwaba nə-dhakba-jang-Ø=m akən=man door=a biya n-akən nu-wilyab nanəngkwarba edhəkəna nə-majuwa-nə=ma	3M-this 3M.man today REAL.3M-knock-REFL-USP=MUT NEUT.that=LOC NEUT.door=PF and.then 3M-that 3M-one 3M.man that.way REAL.3M-walk-PST=MUT	‘Today the man was knocking on the door, and then the other man walked past’	ST, JRB1-037-02, 00:19:27-00:19:35	past	elicitation (video stimuli)
dhakba-jangu	grind; knock [+REFL]	semelfactive	PLUR ACT	dna	y	IMPFV	x	m	hi	cit	Backgr	past	PstMod Iter/HabPred	a:::rakbəwiya n-ərribərriba ('3M-keep.on) V1-∅ biya V2-∅	not LLI?	n-aka nanəngkwarb a:::rakbəwiya n-ərribərriba n-adhakba-ja-Ø=m door=manja biya nanga wurr-akəna warnmamalya ambəlyuma aləlbaj akən=manj angalya n-angkarrə-Ø=m yedhakəna	3M-that 3M.man XTD.long.ago 3M-keep.on REAL.3M-knock-REFL-USP=MUT NEUT.door=LOC and.then ? 3A-that 3A.person NEUT.two ? NEUT.that=LOC NEUT.place REAL.3M-run-USP=MUT that.way	‘A long time ago the man used to keep knocking on the door and then the other man ran that way’	ST, JRB1-037-02, 00:19:55-00:20:07	past	elicitation (video stimuli)
knock-əm-dha	knock	semelfactive	PLUR ACT	dna	y	IMPFV?	x	x	i	c	BackFore + SoE	past	IterMod + Overlap SoE DiscCon	n-ərribərriba ('keep.on') V1-∅ biya V2-∅		n-akən neniyuwangkwa n-ərribərriba nə-knock-əm-dha-Ø-m door-manja biya n-aka nanəngkwarba n-angkarrə-Ø=ma yadhakəna	3M-that 3M.old.man 3M-keep.on REAL.3M>NEUT-knock-TRVSR-BLI-USP=MUT NEUT.door-LOC and.then 3M-that 3m.man REAL.3M-run-USP=MUT that.way	‘The old man kept on knocking on the door, and then the man ran past’	ST, JRB1-037-02, 00:18:49-00:18:57	past	elicitation (video stimuli)
ngwurrukbalija	open(something)	accomplishment	PLUR BD ACC	dna	y	PFV	x	t	i	cit	Narr	past	IterPred SoE DiscCon-PST	n-ərribərriba ('3M.keep.on') V1-∅ akena V2-PST		n-aka nanəngkwarba n-ərribərriba nu-ngwurrubalija-Ø=m akən door=a akena ni-kamadhə-nə=ma	3M-that 3M.man 3M-keep.on REAL.3M>NEUT-open-USP=MUT NEUT.that NEUT.door=PF then REAL.3M-feel.upset-PST-MUT	‘The man kept on opening the fridge and felt sad’	ST, JRB1-037-02, 00:11:48-00:12:02	past	elicitation (video stimuli)
ngwurrukbalija	open(something)	accomplishment	PLUR BD ACC	dna	y	PFV	x	t	ilr	cit	Narr	past	Matrix-PST >> ObjCl-∅ SoE DiscCon-PST	kamb arakba V-1-XTD-PST biya V0-XTD-PST >> V1-∅ akena V2-PST	akena here = but	kamb arakba ni-yen-jama:::-Ø biya n-aka nanungkwarba neni-bəkədha ni-yen-jama-Ø nungurru- ni-ngiyandha-ngu nu-ngurrbalija-Ø-m akən door akena ni-karradhu-nə=ma	then COMPL.ACT REAL.3M-REDUP-do.XTD-PST and.then 3M.that 3M.man 3M-crazy REAL.3M-REDUP-do.XTD-PST REAL.3M-want-PST REAL.3M>NEUT-open-USP=MUT NEUT.that NEUT.door but 3M-unable.to.do(?)-PST=MUT	‘The man kept on trying to open the fridge door, he was a crazy man, but he wasn’t able to’	ST, JRB1-037-02, 00:12:21-00:12:40	past	elicitation (video stimuli)
ngərandha	cut.up	iterated accomplishment	PLUR BD ACC	n	y	PFV	x	tm	x	it	Narr	past	PstMod + IterPred	yarrungkwa V1-∅ n-ərribərriba ('keep on')		n-aka nənəngkwarba yarrungkwa nə-ngərandha-Ø=m akən bread=a n-ərribərriba	3M-that 3M.man yesterday REAL.3M>NEUT-cut.up-USP=MUT NEUT.that NEUT.bread=PF 3M-keep.on	‘Yesterday the man kept on cutting up the bread’	ST, JRB1-038-01, 00:04:17-00:04:25	past	elicitation (video stimuli)
marrakaja	grab; take	iterated achievement	PLUR BD ACC	dna	y	PFV	x	t	di	c	Narr	past	AspMod SoE DiscCon-PST	keep.on ngawa (CONT) V-1-∅ angkəbəbərnama ('all day') ankgwabəbənama V0-PST biya V1-∅ keep.on V2-PST ngewa		dh-akən dhədharrəngka dhə-rribərrib ngəw ying-merrəmaja-Ø=ma-m a-md-akən dhumbala angkəbəbərnama biya n-akən nanəngkwarba ankgwabəbənama nu-wilyaka-Ø=m ayika biya dh akən dhədharra yingi-na-marrakaja-Ø=m dh-ərribərrib a-mdh-akən ayik=dha yengi-yenja-Ø=m ngəwa=dha	3F-that 3F.woman 3F-keep.on CONT.ACT REAL.3F-hang.out-USP=MUT-? NEUT-many-that FEM.clothes all.day and.then 3M-that 3M.man all.day REAL.3M-carry-PST=MUT NEUT.tree and.then 3F-that 3F.woman REAL.3F-3M-grab-USP=MUT 3F-keep.on NEUT-many-that NEUT.tree=TRM 3F-do-PST=MUT CONT.ACT=TRM	‘The woman kept on hanging out the clothes all day, and then the man took the stick and the woman grabbed it’	ST, JRB1-037-02, 00:17:13-00:17:31	past	elicitation (video stimuli)
marerrəmaja	hang.out(something)	iterated accomplishment	PLUR BD ACC?	n	y	PFV	x	t	di	cc	Narr	past	AspMod + SoE DiscCon-PST	dhə-rribərrib ngəw 1-Ø biya V2-PST biya V3-Ø		dh-akən dhədharrəngka dhə-rribərrib ngəw ying-merrəmaja-Ø=ma-m a-md-akən dhumbala angkəbəbərnama biya n-akən nanəngkwarba ankgwabəbənama nu-wilyaka-Ø=m ayika biya dh akən dhədharra yingi-na-marrakaja-Ø=m dh-ərribərrib a-mdh-akən ayik=dha yengi-yenja-Ø=m ngəwa=dha	3F-that 3F.woman 3F-keep.on CONT.ACT REAL.3F-hang.out-USP=MUT-? NEUT-many-that FEM.clothes all.day and.then 3M-that 3M.man all.day REAL.3M-carry-PST=MUT NEUT.tree and.then 3F-that 3F.woman REAL.3F-3M-grab-USP=MUT 3F-keep.on NEUT-many-that NEUT.tree=TRM 3F-do-PST=MUT CONT.ACT=TRM	‘The woman kept on hanging out the clothes all day, and then the man took the stick and the woman grabbed it’	ST, JRB1-037-02, 00:17:13-00:17:31	past	elicitation (video stimuli)
lhəka	go	iterated achievement	PLUR BD ACH	dna	y	PFV	x	x	hi	x	Narr	past	AspMod	angkawura ('all.the.time') angkwababərna ('every day') V1-Ø	corrected glosses for angkawura + angkwababərna	angkawura angkwababərna nə-lhəka-Ø en=lhang=wa angalya	all.the.time always REAL.3M-go-USP 3M.PRO=POSS=ALL NEUT.place	‘he went to his house several times’	JL, JRB1-049-01, 00.09.25-00.09.34	past	elicitation (translation task)
adhərrə	spear; pierce	iterated achievement	PLUR BD ACH	dna	y	PFV	x	x	il	it lli	Narr	past	AspMod-PST XTD SoE DiscCon-PST	ngaw V0-RED-PST XTD-V1-∅ ekena V1-∅ kemba NEG V2-IRR-PST		ni-yen-jem-Ø ngaw n-a:::dhərra-Ø=m akən jurra ekena ne-jerrədhə-Ø=m akən jurr- jurra kemba nara=b kən-adhərre-na	REAL.3M-REDUP-do-PST CONT.ACT REAL.3M>NEUT-XTD.spear-USP=MUT NEUT.that NEUT.paper but REAL.3M-be.finished-USP=MUT NEUT.that NEUT.paper NEUT.paper then NEG=EMPH IRR.3M>NEUT-spear-PST	‘He kept on piercing the paper bag, but then he finished, then he didn’t pierce [it] anymore’	ST, JRB1-037-01, 00:25:09-00:25:18	past	elicitation (video stimuli)
lhəka	go	iterated achievement	PLUR BD ACH	dna	n	PFV	x	x	x	it	Narr	past	SoE parataxis?	ngaringka V1-∅ V1-∅		ngaringka yingə-lhəka-Ø yingə-lhəka-Ø	again REAL.3F-go-USP REAL.3F-go-USP	‘She kept on going’	Stokes 1971: 31	past	elicitation (translation task)
dhakba-jangu	grind; knock [+REFL]	activity bounded	PLUR BD ACT BD	n	y	PFV	x	t	x	c	Narr	past	SoE DiscCon	V0-PST akwa V1-Ø		nu-ruki+lyaka-ja-Ø=ma akwa nə-dhakba-jang-Ø=ma	REAL.3m>NEUT-stir-CAUS-USP=MUT and REAL.3M-grind-REFL-USP=MUT	‘he stirred and ground up [the food]’	ST, JRB1-029-03, 00.27.28-00.27.34	past	elicitation (video stimuli)
ruk+wulyaka-ja	stir; spin; turn.around	activity bounded	PLUR BD ACT BD	n	y	PFV	x	x	x	c	Narr	past	SoE DiscCon	V1-Ø akwa V2-Ø	could be durative perfective	nu-ruki+lyaka-ja-Ø=ma akwa nə-dhakba-jang-Ø=ma	REAL.3m>NEUT-stir-CAUS-USP=MUT and REAL.3M-grind-REFL-USP=MUT	‘he stirred and ground up [the food]’	ST, JRB1-029-03, 00.27.28-00.27.34	past	elicitation (video stimuli)
ruk+wulyaka-ja	stir; spin; turn.around	activity bounded	PLUR BD ACT BD	n	y	PFV	x	t	x	c	Narr	past	SoE DiscCon-PST	V1-Ø akwa V2-PST		n-aka nenəngkwarba nə-ruk+wulyaka-ja-Ø=ma, nu-rək+wulyaka-ja-Ø anhənga akwa n-errəngala-ng=ma	3M-this 3M.man REAL.3M>NEUT-stir-CAUS-USP=MUT REAL.3M>NEUT-stir-CAUS-USP NEUT.food and REAL.3M-itch-PST=MUT	‘The man stirred the food and ate it’	CW, JRB1-023-01, 00.24.42-00.25.06	past	elicitation (video stimuli)
ruk+wulyaka-ja	stir; spin; turn.around	activity bounded	PLUR BD ACT BD	n	y	PFV	x	t	x	c	Narr	past	SoE DiscCon-PST	V1-Ø akwa V2-PST		n-aka nenəngkwarba nə-ruk+wəlyaka-ja-Ø=ma anhənga akwa n-alyba-rnə=ma	3M-this 3M.man REAL.3M>NEUT-stir-CAUS-USP=MUT NEUT.food and REAL.3M-eat-PST=MUT	‘The man stirred the food and ate it’	CW, JRB1-023-01, 00.29.36-00.30.02	past	elicitation (video stimuli)
ruk+wulyaka-ja	stir; spin; turn.around	activity bounded	PLUR BD ACT BD	n	y	PFV	x	t	x	c	Narr	past	SoE DiscCon-PST	V1-Ø akwa V2-PST		n-akəna ni-yuwkujiya nəmə-rək+wulyaka-ja-Ø-ma… akwa n-andhey=ma	3M-that 3M.small REAL.3M>VEG-stir-CAUS-USP=MUT… and REAL.3M-look.PST=MUT	‘The boy turned [the wheel] around and looked out [of the binoculars]’	JL, JRB1-023-01, 00.36.30-00.36.58	past	elicitation (video stimuli)
njurrkwa-ja	move	bounded iterated activity	PLUR BD ACT BD	n	y	PFV-Weak	x	m	x	c	Narr	past	PstMod + SoE DiscCon	arakbəwiya V0-Ø akwa V1-Ø	PC - weak perfective	arakbəwiya n-aka nenəngkwarba nu-njurr-kwa-ja-Ø=ma akəna fridge=a ekena engkəbərrungwərrungwa or kamba ngə-nekibulu-Ø=m akəna	long.ago 3M-this 3M.man REAL.3M>NEUT-move-CAUS-USP=MUT NEUT.that NEUT.fridge=PF but NEUT.heavy then REAL.3M>NEUT(?)-give.up(?)-USP=MUT NEUT.that	‘Long time ago the man [tried to] move the fridge, but it was too heavy’ or ‘and so he gave up’	JL, JRB1-038-01, 00:13:47-00:14:06	past	elicitation (video stimuli)		frustrative
lhawurradhə	return	bounded iteration of achievement	PLUR MAX ACT	dna	y	PFV	x	x	x	pit	Narr	past	SoE-RED parataxis	V1-RED-∅ V2-∅		na-lhawu-lhawurradh-Ø, nuw-angkarra-Ø	REAL.NEUT-REDUP-return-USP REAL.NEUT-run-USP	‘It [the mother cat] kept going back, it ran off’	GL, A3369a Side 1 a3.4, Bujikeda ‘Mother cat’, 00.07.28-00.07.32	past	narrative
ngwurrukbalija	open(something)	iterated accomplishment	PLUR UBD ACC	n	y	PFV?	x	tm	ir	it	Backgr?	past	PstMod AspMod Iter-XTD-PST + RED.Echo	a:::rakbəwiya V1-∅ V2-XTD-PST ('do-ITER')		a:::rakbəwiya n-aka nanəngkwarba nu:::-ngurrkbalija-Ø=m akən fridge=la door=a ni-yen-jama:::-Ø nu-ngurrbalija-Ø=ma ni-dharra-Ø-ma ani nu-ngurrbalija-Ø=ma nganing ni-dharra-Ø=ma arakb-urakbəwiya	XTD.long.ago 3M-that 3M.man REAL.3M>NEUT.XTD-open-USP=MUT NEUT.that NEUT.fridge=LOC NEUT.door=PF REAL.3M-REDUP-do.XTD-PST REAL.3M>NEUT-open-USP=MUT REAL.3M>NEUT-close-USP=MUT ? REAL.3M>NEUT-open-USP=MUT ? REAL.3M>NEUT-close-USP=MUT REDUP-long.ago	‘a long, long time ago the man opened and closed the fridge over and over again’	ST, JRB1-037-02, 00:07:01-00:07:21	past	elicitation (video stimuli)
lhəka	go	iterated achievement or hab achievement	PLUR UBD ACH or HAB ACH	dna	y	PFV?	x	x	hi	x	Narr? Backgr?	past	AspMod	angkawura ('all the time') angkwababərnama ('every day') V1-Ø	corrected glosses for angkawura + angkwababərna	angkawura angkabəbərnama nə-lhəka-Ø en=lhang=wa angalya	all.the.time always REAL.3M-go-USP 3M.PRO=POSS=ALL NEUT.place	‘he always went from his place’	JL, JRB1-049-01, 00.11.56-00.12.05	past	elicitation (translation task)
lhəka	go	iterated achievement or hab achievement	PLUR UBD ACH or HAB ACH	dna	y	PFV?	x	x	hi	x	Narr? Backgr?	past	AspMod	angkabəbərnama ('every day') V1-Ø		angkabəbərnama nə-lhəka-Ø en=lhang=wa angalya always	always REAL.3M-go-USP 3M.PRO=POSS=ALL NEUT.place	‘he went to his house, several times, he went to his house’	JL, JRB1-049-01, 00.12.28-00.12.44	past	elicitation (translation task)
lhəka	go	iterated achievement or hab achievement	PLUR UBD ACH or HAB ACH	dna	y	IMPFV?	x	m	hi	x	Backgr (Hab)?	past	PstMod + AspMod	arakbəwiya angkabəbərnama V1-Ø		arakbəwiya angkabəbərnama nə-lhəka-Ø en=lhang=wa angalya	long.ago always REAL.3M-go-USP 3M.PRO=POSS=ALL NEUT.place	‘like several times, many times, or several times he used to- went- walked to his house’	JL, JRB1-049-01, 00.13.00-00.13.20	past	elicitation (translation task)
ruk+wulyaka-ja	stir; spin; turn.around	iterated semelfactive	PLUR UBD SEM	n	y	IMPFV	x	tm	x	co	BackFore	past	Sim-PST Overlap-PST	V0-PST akwa V1-Ø, V2-PST akwa V3-PST	Bck on 'stir'	yarrungkwa nu-wilyaba nenəngkwarba nə-murrkulhə=ma eni=lhang=ma murrkwa akwa nə-rukwi+lyakaja-Ø=ma anhənga en-aja nu-wilyaba nenəngkwarba nə-lhəke-na akwa nə-kwa+bijangu-nə=ma	yesterday 3M-one 3M.man REAL.3M-lie.down.PST=MUT 3M.PRO=POSS=INST VEG.stomach and REAL.3M-stir-USP=MUT NEUT.food 3M.PRO-CofR 3M-one 3M.man REAL.3M-go-PST and REAL.3M-jump-PST=MUT	‘yesterday the man was lying down on his stomach, he stirred the food, [and] another man went past and jumped’	CW, JRB1-032-01, 00.21.23-00.22.05	past	elicitation (video stimuli)
ruk+wulyaka-ja	stir; spin; turn.around	iterated semelfactive	PLUR UBD SEM	n	y	IMPFV	x	t	x	o	BackFore	past	Back-Fore-PST Overlap-PST DiscCon	V0-Ø V1-PST	Fore on following V	n-akəna nenəngkwarba nu-rukwi+lyakaja-Ø=ma anhənga ena-ja nu-wilyaba nenəngkwarba nenu-kwa-Ø=ma ayika	3M-that 3M.man REAL.3M>NEUT-stir-USP=MUT NEUT.food 3M.PRO-CofR 3M-one 3M.man REAL.3M>3M-give-PST=MUT NEUT.stick	‘The man stirred the food and the other man gave him the stick’	CW, JRB1-032-01, 00.28.50	past	elicitation (video stimuli)
ruk+wulyaka-ja	stir; spin; turn.around	iterated semelfactive	PLUR UBD SEM	n	y	IMPFV	x	tm	x	co	BackFore	past	PstMod + SoE-PST parataxis + SoE DiscCon	yarrungkwa V1-Ø V2-PST akwa V3-Ø	Bck on 'stir'	yarrungkwa n-akəna nenəngkwarba nu-rukwi+lyakaja-Ø=ma anhənga ene-ja nu-wilyaba nenəngkwarba nenu-kwa-Ø=ma ayika akwa nu-rukwu+lyakaja-Ø=ma	yesterday 3M-that 3M.man REAL.3M>NEUT-stir-USP=MUT NEUT.food 3M.PRO-CofR 3M-one 3M.man REAL.3M>3M-give- PST=MUT NEUT.tree and REAL.3M>NEUT-stir-USP=MUT	‘the man was stirring the food, the other man give him a stick, and he kept stirring the food’	CW, JRB1-032-01, 00.29.45	past	elicitation (video stimuli)
ruk+wulyaka-ja	stir; spin; turn.around	iterated semelfactive	PLUR UBD SEM	n	y	IMPFV	x	x	i	x	Backgr?	past	AspMod + Overlap DiscCon	akwa n-irribərriba (3sg.keep.on) V1-∅		akwa n-irribərriba nu-rukwə+lyakaja-Ø=ma	and 3M-keep.on REAL.3M>NEUT-stir-USP=MUT	‘he was keep on stirring’	CW, JRB1-032-01, 00.30.45	past	elicitation (video stimuli)
arrangba	collect	accomplishment	Q INCR	closed max	y	PFV	x	tm	x	c	Narr	past	PstMod + SoE DiscCon-PST	yarrungkwa V1-Ø akwa V2-PST akwa V3-PST		yarrungkwa n-akən nenəngkwarba n-arrangba-Ø=ma ayika-murriya akwa nə-ləraka-Ø angwura akwa nə-dhaka-Ø amadhangkwa yiburadha=lhangwa	yesterday 3M-that 3M.man REAL.3M-collect-USP=MUT NEUT.tree-the.rest and REAL.3M-light.fire-PST NEUT.fire and REAL.3M-cook-PST NEUT.meat MASC.wallaby=POSS	‘Yesterday the man collected the firewood, made a fire, and roasted the wallaby meat’	JL, JRB1-034-01, 00.20.02-00.20.37	past	elicitation (translation task)
dhakba-jangu	grind; knock [+REFL]	accomplishment	Q INCR	n	y	PFV	x	x	x	x	Narr	past	∅?	V1-Ø		nə-dhakba-jangu-Ø=ma	REAL.3M-grind-REFL-USP=MUT	‘[he] ground up [the food]’	JL, JRB1-029-03, 00.27.50-00.27.53	past	elicitation (video stimuli)
dhakba-jangu	grind; knock [+REFL]	accomplishment	Q INCR	closed max	y	PFV	x	x	x	c	Narr	past	SoE DiscCon	akwa V1-∅	translation suggests 'grind' is in fact an accomplishment verb. So non-culminating readings might be PC (partitive culminations)	akwa na-dhakba-jangu-Ø=ma	and REAL.3M-grind-REFL-USP=MUT	‘and he ground up [the food]’	JL, JRB1-029-03, 00.27.14	past	elicitation (video stimuli)
dhərra	shut; close	accomplishment	Q INCR	closed max	y	PFV	x	tm	ir	it lli	Narr	past	PstMod + IterPred + XTD + SoE parataxis-PST	a:::rakbəwiya XTD-V-1-∅ XTD-V0('do')-RED-PST V1-∅ V-1'-∅ V1'-∅	first lengthening is not LLI; second, unclear; multiple red patterns (incl. Echo RED)	a:::rakbəwiya n-aka nanəngkwarba nu:::-ngurrkbalija-Ø=m akən fridge=la door=a ni-yen-jama:::-Ø nu-ngurrbalija-Ø=ma ni-dharra-Ø-ma ani nu-ngurrbalija-Ø=ma nganing ni-dharra-Ø=ma arakb-urakbəwiya	XTD.long.ago 3M-that 3M.man REAL.3M>NEUT.XTD-open-USP=MUT NEUT.that NEUT.fridge=LOC NEUT.door=PF REAL.3M-REDUP-do.XTD-PST REAL.3M>NEUT-open-USP=MUT REAL.3M>NEUT-close-USP=MUT ? REAL.3M>NEUT-open-USP=MUT ? REAL.3M>NEUT-close-USP=MUT REDUP-long.ago	‘a long, long time ago the man opened and closed the fridge over and over again’	ST, JRB1-037-02, 00:07:01-00:07:21	past	elicitation (video stimuli)
kw+arrangə	cut	accomplishment	Q INCR	closed max	y	PFV	x	m	x	x	Narr	past	PstMod	yarrungkwa V1-Ø	probably not an achievement	yarrungkwa n-akəna nenəngkwarba nu-kw+arrangu-Ø=ma amamərerra ayika	yesterday 3M-that 3M.man REAL.3M>NEUT-half+cut-USP=MUT NEUT.branch NEUT.tree	‘The man cut the branch of a tree’	JL, JRB1-024-01, 00.23.12-00.23.34	past	elicitation (video stimuli)
kw+arrangə	cut	accomplishment	Q INCR	closed max	y	PFV	x	x	x	x	Narr	past	∅?	V1-∅		dh-akəna dhədharrəngka yungu-kw+arrangu-Ø=ma bread=a	3F-that 3F.woman REAL.3F>NEUT-half+cut-USP=MUT NEUT.bread=PF	‘The woman cut the bread’	JL, JRB1-032-01, 00:02:22-00:02:29	past	elicitation (translation task)
kwarra	break; break.up	accomplishment	Q INCR	closed max	y	PFV	x	x	x	x	Narr	past	∅	V1-∅		n-akəna nenəngkwarba nu-kwarra-Ø=m ayika saw	3M-that 3M.man REAL.3M>NEUT-break.up-USP=MUT NEUT.tree NEUT.saw	‘The man broke the tree [with a] saw’	CW, JRB1-032-01, 00.07.23	past	elicitation (video stimuli)
lhəkəraka	build.something	accomplishment	Q INCR	closed max	y	PFV	x	m	x	x	Narr	past	PstMod	yarrungkwa V1-∅		yarrungkwa n-akəna nenəngkwarba nə-lhəkəraka-Ø alhəkəra	yesterday 3M-that 3M.man REAL.3M>NEUT-build-USP NEUT.house	‘Yesterday that man built a house’	JL, JRB1-060-02, 00.01.33-00.01.38	past	elicitation (flash card stimuli)
marerrəmaja	hang.out(something)	accomplishment	Q INCR	closed max	y	PFV	x	x	x	x	Narr	past	∅?	V1-Ø		dh-akəna dhədharrəngka yingu-marerrəmaja-Ø=ma dumbala line=manja	3F-that 3F.woman REAL.3F-hang.out-USP=MUT FEM.clothes NEUT.line=LOC	‘The woman hung out the clothes on the line’	CW, JRB1-032-01, 00.24.19	past	elicitation (video stimuli)
marerrəmaja	hang.out(something)	accomplishment	Q INCR	closed max	y	PFV	x	t	x	x	Narr	past	∅?	V1-Ø		yarrungkwa dh-akəna dhədharrəngka ying-mərerrəmaja-Ø=ma dumbala	yesterday 3F-that 3F.woman REAL.3F-hang.out-USP=MUT FEM.clothes	‘The woman hung out the clothes’	CW, JRB1-032-01, 00.25.29	past	elicitation (video stimuli)
marerrəmaja	hang.out(something)	accomplishment	Q INCR	closed max	y	PFV	x	t	x	c	Narr	past	SoE DiscCon-PST	V1-Ø aken V2-PST		dh-akan dhədharrəngka ying-merrimaja-Ø=ma dhumbala aken n-aka nanəngkwarba nangə-kwa-Ø-m dejik=dha	3F-that 3F.woman REAL.3F-hang.out-USP=MUT FEM.clothes then 3M-that 3M.man REAL.3M>3F-give-PST=MUT NEUT.thing=TRM	‘The woman hung the clothes out, then the man gave her something’	ST, JRB1-032-01, 00:13:13-00:13:31	past	elicitation (video stimuli)
marerrəmaja	hang.out(something)	accomplishment	Q INCR	closed max	y	PFV	x	tm	x	cc	Narr	past	PstMod + SoE DiscCon-PST	yarrungkwa V1-Ø akəna V2-PST biya V3-PST		dh-akən dhədharrəngka yarrungkwa ying-merrəmaju-Ø=ma akəna dhumbala biya n-akəna nanəngkwarba ni-ləka-n ngaluwə-wa biya yinga-ma-ng akəna amdejika	3F-that 3F.woman yesterday REAL.3F-hang.out-USP=MUT NEUT.that FEM.clothes and.then 3M-that 3M.man REAL.3M-go-PST 3F.PRO=ALL and.then REAL.3F-take-PST NEUT.that NEUT.that	‘Yesterday the woman hung out the clothes and then the man went to her and took something from her’	ST, JRB1-037-02, 00:15:10-00:15:27	past	elicitation (video stimuli)
ngkə+lharrə	fall	accomplishment	Q INCR	closed max	y	PFV	x	t	x	c	Narr	past	SoE-PST DiscCon	V0-PST akwa V1-Ø		n-aka nənəngkwarba ma-rəngadha-ngu=ma banana=lhangwa mama ayika akwa nəmi-ngkə+lharrə-Ø=m=dha	3M-this 3M.man REAL.3M>VEG(?)-cut.up-PST=MUT banana=ABL VEG.trunk NEUT.tree and REAL.VEG-?+fall-USP=MUT=TRM	‘The man cut up the banana tree and [it] fell down’	ST, JRB1-029-03, 00.20.42	past	elicitation (video stimuli)
ngwurrukbalija	open(something)	accomplishment	Q INCR	closed max	y	PFV	x	t	x	co	ForeBack/Explanation	past	SoE Overlap-PST	V1-∅ V2-PST		n-aka nanəngkwarba nu-ngwurrukbalija-Ø=ma akəna door=a akəna frigereyda n-abəringke-nə=m anhənga	3M-this 3M.man REAL.3M>NEUT-open-USP=MUT NEUT.that NEUT.door=PF NEUT.that NEUT.refrigerator REAL.3M-look.for-PST=MUT NEUT.food	‘The man opened the fridge door, looking for food’	ST, JRB1-037-02, 00:05:13-00:05:23	past	elicitation (video stimuli)
ngwurrukbalija	open(something)	accomplishment	Q INCR	closed max	y	PFV	x	tm	x	co	ForeBack/Explanation	past	PstMod SoE GoalSub-IRR-PST	yarrungkwa V1-∅ V2-IRR-PST=PURP		n-aka nanəngkwarba yarrungkwa nu-ngwurrkablija-Ø=ma akən door=a akən fridge=a kajungwa kən-abərungke-ni=yadh anhənga	3M-that 3M.man yesterday REAL.3M>NEUT-open-USP=MUT NEUT.that NEUT.door=PF NEUT.that NEUT.fridge=PF so.that IRR.3M-look.for-PST=PURP NEUT.food	‘Yesterday the man opened the fridge door, in order to look for food’	ST, JRB1-037-02, 00:05:28-00:05:36	past	elicitation (video stimuli)
ngwurrukbalija	open(something)	accomplishment	Q INCR	closed max	y	PFV	x	t	dir	it lli	Narr	past	AspMod Iter SoE-PST + Overlap-PST	n-ərribərriba (3sg.keep.on) arngkəbəbərnama ('many.time') V1-∅ V2-PST V3-PST V4-∅ V5-PST V6-∅		n-aka nanəngkwarba n-ərribərriba arngkəbəbərnama nu-ngwurrkbalija-Ø-ma akən door akəna fridge-a n-abəringke-nə-m anhənga nə-dhərra-ngə=wanə nu-ngwurrkbalija-Ø=ma nə-dhərra-ngə=wanə nu-ngwurrkbalija-Ø-ma n-ərribərriba arngkəbəbənama	3M-that 3M.man 3M-keep.on all.day REAL.3M>NEUT-open-USP=MUT NEUT.that NEUT.door NEUT.that NEUT.fridge REAL.3M-look.for-PST=MUT NEUT.food REAL.3M>NEUT-close-PST=EMPH? REAL.3M>NEUT-open-USP=MUT REAL.3M>NEUT-close-PST=EMPH? REAL.3M>NEUT-open-USP=MUT 3M-keep.on all.day	‘he opened it and he closed it, he opened it and he closed it, he closed the door, opened it, kept going all day’	ST, JRB1-037-02, 00:05:51-00:06:10	past	elicitation (video stimuli)
ngwurrukbalija	open(something)	accomplishment	Q INCR	closed	y	PFV	x	tm	x	c	Narr	past	SoE DiscCon-PST	V1-∅ kina ('then') V2-PST		n-aka nenəngkwarba n-ambijangaja-Ø-ma akəna brijərayda=lhanga door=a kina ni-kamadhə-nə=ma	3M-that 3M.man REAL.3M>NEUT-open-USP=MUT NEUT.that NEUT.refridgerator=POSS NEUT.door=PF then REAL.3M-feel.upset-PST-MUT	‘The man opened the fridge and felt sad’	CW, JRB1-037-02, 00:10:36-00:10:46	past	elicitation (video stimuli)
ngwurrukbalija	open(something)	accomplishment	Q INCR	closed	y	PFV	x	t	x	p	Narr	past	SoE-PST parataxis	enenuwiya ('now') V-1-NPST ekena V0-PST V1-∅	not a very coherent example? Or speaker 'lapses' into PST as soon as SoE?	enenuwiya akən nə-ngwurrbalij-na=m akəna door=a ekena ni-kamadhə-nə=ma nanəkabə- ənəngudh- nə-ngurrbaliji-Ø=yedha akəna akudhijung door=a akənə=ng brijərayda=dha	now NEUT.that REAL.3M>NEUT-open-NPST=MUT NEUT.that NEUT.door=PF then REAL3M-feel.upset-PST=MUT REAL.3M>NEUT-open-USP=PURP NEUT.that NEUT.door NEUT.door=PF NEUT.that=POSS NEUT.refridgerator=TRM	‘The man opened the door just now and felt upset’	ST, JRB1-037-02, 00:09:55-00:10:23	past	elicitation (video stimuli)
wərumbi-ja	cover.something	accomplishment	Q INCR	closed max	y	PFV	x	tm	x	c	Narr	past	PstMod SoE-PST DiscCon	yarrungkwa V0-PST akwa V1-Ø		yarrungkwa n-aka nenəngkwarba nə-lyinga-Ø=ma akəna lyelyinga en=lhang=manja ayerrka akwa nu-wərumbi-ja-Ø=ma akəna lyelyinga jurra=ma	yesterday 3M-this 3M.man REAL.3M>NEUT-hold-PST=MUT NEUT.that NEUT.knife 3m.PRO=POSS=LOC NEUT.hand and REAL.3M-cover-CAUS-USP=MUT NEUT.that NEUT.knife NEUT.paper=INST	‘Yesterday the man held the knife in his hand and covered it with the paper’	JL, JRB1-029-03, 00.05.38-00.06.07	past	elicitation (video stimuli)
eburrəwendi-ja	cover.something	accomplishment/state	Q INCR/CUM	closed max/n	y	IMPFV	x	x	x	c	Backgr	past	DiscCon SoE	kemba V1-Ø	translation is a bit strange given 'kemba'	kemba n-eburrəwendhi-ja-Ø-ma jurra=ma	then REAL.3M>NEUT-cover-CAUS-USP=MUT NEUT.paper=INST	‘he was covering that knife with the brown paper’ (strange translation given 'kemba'; looks more like 'then he covered')	JL, JRB1-029-03, 00.04.13-00.04.18	past	elicitation (video stimuli)
lyangk+wama-ja	blink	semelfactive	SEM ATM	b	y	PFV	x	x	x	x	Narr	past	∅	V1-Ø		n-aka nenəngkwarba nəma-lyangk+wama-ja-Ø-ma	3M-this 3M.man REAL.3M<VEG-head+nod-CAUS-USP=MUT	‘He blinked [his eye]’	CW, JRB1-023-01, 00.13.32-00.13.40	past	elicitation (video stimuli)
lyangk+wama-ja	blink	semelfactive	SEM ATM	b	y	PFV	x	x	x	x	Narr	past	∅	V1-Ø		nəma-lyangk+wəma-ja-Ø-ma	REAL.3M<VEG-head+nod-CAUS-USP=MUT	‘He blinked [his eye]’	JL, JRB1-023-01, 00.13.44-00.13.46	past	elicitation (video stimuli)
lyangk+wama-ja	blink	semelfactive	SEM ATM or PLUR SEM BD	b	y	PFV	x	m	x	x	Narr	past	PstMod	yarrungkwa V1-Ø		yarrungkwa n-akəna nenəngkwarba numa-lyangk+wama-ja-Ø-ma menba	yesterday 3M-that 3M.man REAL.3M<VEG-head+nod-CAUS-USP=MUT VEG.eye	‘Yesterday the man blinked his eye’	JL, JRB1-023-01, 00.15.54-00.16.12	past	elicitation (video stimuli)
mədhilyakbə	cough	semelfactive	SEMELF BD	dna	n	PFV	x	t	x	cc	Narr	past	SoE DiscCon-IRR.PST	V-2-∅ akwa V-1-∅ akwa kamba V0-∅ V1-∅ V2-IRR-PST	CofS affix +-∅ or did you change your mind? Anin texts is rather: 'he came and sat down, sneezed, then stood up and walked away'	n-akən nanəngkwarba nə-lhəka-Ø=ma n-ambarr-nga=ma akən-manja chair=a akwa nə-mədhilyakbə-Ø-ma akwa kamba nə-kw-aji-nga=ma kənə-lhəka-nə=ma	3M-that 3M.man REAL.3M-go-USP=MUT REAL.3M-sit-CofS=MUT NEUT.that=LOC chair=PF and REAL.3M-cough-USP=MUT and then REAL.3M-half(?)-be.upright-CofS=MUT IRR.3M-go-PST=MUT	‘he stood up, coughed, and walked away’	ST, JRB1-037-01, 00:31:11-00:31:21	past	elicitation (video stimuli)
ararurrmaja	dry(something)	hab accomplishment	STATE HAB	n	y	IMPFV	x	t	h	g	Backgr	past	Overlap-PST RED (Hab)	V0-PST RED-V1-Ø		yirra-rrbə-rrəngka-Ø=ma na-yan-jamarrka-Ø=ma yakwujina adhalyəma=manja narrəma-mərndak-ajirra-ngə=ma dhəmbalha-mərriya narrəma-mərndak-ara-rurrmaja-Ø=ma karrawara amarda-mirriya=manja	REAL.1A>3A-REDUP-see-PST=MUT REAL.3A-REDUP-how.to.do-PST=MUT there NEUT.river=LOC REAL.3A>VEG-many-wash-PST=MUT VEG.clothes-the.rest REAL.3A>VEG-many-REDUP-dry-USP=MUT above NEUT.grass-the.rest=LOC	‘We used to watch older women at the river wash their clothes and dry [them] on dry grasses’	JL, JRB1-007-01, 00.00.56-00.01.09	past	narrative
marerrəmaja	hang.out(something)	hab accomplishment	STATE HAB	dna	y	IMPFV	x	tm	x	cc	Backgr	past	PstMod + SoE DiscCon-PST	arakb-ərakbəwiya V1-∅ biya V2-PST biya V3-PST		arakb-ərakbəwiya dh-akan dhədharrəngka ngalang=manj angalya ying-merrəmaja-Ø-m akən dhubala biya n-akən nanəngkwarba nə-ləka-rna ngaluwə-wa biya dh-akəna yinga-ma-ng akən amdejika enuwa=lhanga	REDUP-long.ago 3F-that 3F.woman 3F.PRO=LOC NEUT.place REAL.3F-hang.out-USP=MUT NEUT.that FEM.clothes and.then 3M-that 3M.man REAL.3M-go-PST 3F.PRO=ALL and.then 3F-that 3F-take-PST NEUT.that NEUT.thing 3M.PRO=ABL	‘A long time ago the woman hung the clothes out in that place and then the man went to her and she took something from him’	ST, JRB1-037-02, 00:15:46-00:16:03	past	elicitation (video stimuli)
wara	rise; get.up	hab achievement	STATE HAB	dna	n	IMPFV	x	x	hi	g	Backgr	past	AspMod Hab	V1-∅ arngkawura ('all the time')	Translation?? 'he slept well as a baby, now sometimes he gets up, sometimes he sleeps'	wurri-yukwujiya wurru-wanki-yukwujiya wurr-angariya wurr-abarda marrnga akən nə-wara-Ø-mə=dha arngkawura nu-mkulha=ma n-akən marrnga	COLL-small COLL-DIM-small COLL-baby COLL-good VEG.sleep NEUT.that REAL.NEUT-get.up-USP=MUT=TRM sometimes REAL.NEUT-sleep.NPST=MUT 3M-that VEG.sleep	‘so when he was a baby he slept all the time, now he's grown he sleeps now and then’	ST, JRB1-037-01, 00:13:59-00:14:19	past	elicitation (video stimuli)
angkarrə	run	hab iterated achievement	STATE HAB	n	y	IMPFV	x	t	li	g	Backgr	past	PstMod-XTD + AspMod Iter + SoE DiscCon	a:::rakbəwiya n-ərribərriba V0-Ø biya V1-Ø	Durative bounded?	n-aka nanəngkwarb a:::rakbəwiya n-ərribərriba n-adhakba-ja-Ø=m door=manja biya nanga wurr-akəna warnmamalya ambəlyuma aləlbaj akən=manj angalya n-angkarrə-Ø=m yedhakəna	3M-that 3M.man XTD.long.ago 3M-keep.on REAL.3M-knock-REFL-USP=MUT NEUT.door=LOC and.then ? 3A-that 3A.person NEUT.two ? NEUT.that=LOC NEUT.place REAL.3M-run-USP=MUT that.way	‘A long time ago the man used to keep knocking on the door and then the other man ran that way’	ST, JRB1-037-02, 00.19.55-00.20.07	past	elicitation (video stimuli)
jungwa	die	achievement	ATM	b	n	PERF	x	x	x	cr	Perf context	past>present	PerfMod Matrix-∅(PERF) >> ObjCl	arakba V0-∅ >> V1-∅	inceptive/achievement reading of perception V	yirrə-rrəngka-Ø=ma arakba ngayuwa nəng-enibu-dhə-Ø=ma amandhangwa nəngi-jungwu-Ø=mərra=dha	REAL.2A-see-PST=MUT COMPL.ACT 1.PRO REAL.1-alive-INCH-USP=DEP true REAL.1-die-USP=MUT=TRM	‘Now you have seen that I really am alive again [it’s true that I died before]’	Bible Society in Australia 1992: 890	present	narrative (text translation)
jungwa	die	achievement	ATM	b	n	PERF	i	m	x	cr	Argu Deon	past>present	PerfMod	V1-∅ arakba ('now that…') V2-NPST		“ni-jungwu-Ø=ma arakba naw-ena, əmba Ø-lhəka-ja arakba dh-ibinu=wa dhadhingiy-enikba jeyi	REAL.3M-die-USP=MUT COMPL.ACT 3M.brother-2.KIN but DEON.2-go-NPST COMPL.ACT 3F-that.same=ALL 3F.wife-3M.KIN go!	“Now that your brother has died, go to his widow”	Bible Society in Australia 1992: 312	past	narrative (text translation)
ngkə+lharrə	fall	achievement	ATM	b	n	PERF	x	x	x	r	Argu Epist	past>present	PerfMod	abad ('already') V1-∅		akəna eyika ebina ngaya ngu-lung+kwabija-Ø=ma dhukwa arakba akəna enuwə- enungkuraba akwa a-warnk-amiyerra nuw-ambilyu=m=ba biya yakwujina dhuk enukurab akən abab dhuku ne-ngkə+larra-Ø ajurungku=dha	NEUT.that NEUT.tree NEUT.that.same 1.PRO REAL.1-grow-USP=MUT maybe COMPL.ACT NEUT.that NEUT.old and NEUT-DIM-long.time REAL.NEUT-stay.PST=MUT=EMPH and.then there maybe NEUT.old NEUT.that COMPL.ACT maybe REAL.NEUT-?+fall-USP NEUT.ground=TRM	‘The tree grew already, maybe it’s already old, maybe it fell down to the ground’	JL, JRB1-042-01, 00:14:38-00:14:56	past	elicitation (translation task)		epistemic
yedha	arrive	achievement	ATM	b	n	PERF	x	x	x	r	Argu Epist	past>present	EpistMod PerfMod	dhukwa arakba V1-∅		dhukwa arakb ni-yedha-Ø-m=dha ni-yedha-nga	maybe COMPL.ACT REAL.3M-arrive-USP=MUT=TRM REAL.3M-arrive-PST	‘Maybe he already arrived’	JL, JRB1-042-01, 00:11:26-00:11:42	past	elicitation (translation task)		epistemic
lung+kwabija	grow; plant	accomplishment	I INCR	closed max	n	PERF	x	x	x	r	Perf context	past>present	∅ PerfectMod	V1-∅ < arakba PROP		akəna eyika ebina ngaya ngu-lung+kwabija-Ø=ma dhukwa arakba akəna enuwə- enungkuraba akwa a-warnk-amiyerra nuw-ambilyu=m=ba biya yakwujina dhuk enukurab akən abab dhuku ne-ngkə+larra-Ø ajurungku=dha	NEUT.that NEUT.tree NEUT.that.same 1.PRO REAL.1-grow-USP=MUT maybe COMPL.ACT NEUT.that NEUT.old and NEUT-DIM-long.time REAL.NEUT-stay.PST=MUT=EMPH and.then there maybe NEUT.old NEUT.that COMPL.ACT maybe REAL.NEUT-?+fall-USP NEUT.ground=TRM	‘The tree grew already, maybe it’s already old, maybe it fell down to the ground’	JL, JRB1-042-01, 00:14:38-00:14:56	present	elicitation (translation task)
enibu-dhə	be.alive; become.alive	CofS/state	INCH ATM	b	n	PERF	x	x	x	cr	Perf context	past>present	PerfMod Matrix-∅(PERF) >> ObjCl	arakba V0-∅ >> V1-∅ ('now' + result)	you have seen that I have become alive again'	yirrə-rrəngka-Ø=ma arakba ngayuwa nəng-enibu-dhə-Ø=ma amandhangwa nəngi-jungwu-Ø=mərra=dha	REAL.2A-see-PST=MUT COMPL.ACT 1.PRO REAL.1-alive-INCH-USP=MUT true REAL.1-die-USP=MUT=TRM	‘Now you have seen that I really am alive again [it’s true that I died before]’	Bible Society in Australia 1992: 890	present	narrative (text translation)
angkarrə	run	activity	CUM	dna	y	IMPFV	x	x	x	x	Backgr	present	∅	V1-Ø		n-angkarra-Ø	REAL.3M-run-USP	‘[he] runs’ (JB asks ‘and is that for now or before?’, JL replies ‘now’)	JL, JRB1-060-02, 00.25.33-00.25.38	present	elicitation (video stimuli)
angkarrə	run	activity	CUM	dna	y	IMPFV	m	x	x	x	Backgr	present	PrMod 'now'	V1-Ø		n-angkarra-Ø, now, n-angkarra-Ø	REAL.3M-run-USP REAL.3M-run-USP	‘[he] runs’	JL, JRB1-060-02, 00.27.39-00.27.42	present	elicitation (video stimuli)
engkərrka	think; listen	activity	CUM	n	y	IMPFV	x	x	x	x	Backgr	present	∅?	V1-∅		n-aka nenəngkwarba n-engkirrka-Ø	3M-this 3M.man REAL.3M-think-USP	‘that man, he think[s]’	JL, JRB1-049-01, 00.48.45-00.48.50	present	elicitation (translation task)
engkərrka	think; listen	activity	CUM	n	y	IMPFV	i	x	x	o	Backgr	present	RED-Ech + V-PR	V1-∅ V2-∅ V3-∅ V4-NPST		n-akəna nenəngkwarba n-engkirrka-Ø n-engkirrka-Ø n-engkirrka-ja-ma=na?, n-engkirrka-Ø	3M-that 3M.man REAL.3M-think-USP REAL.3M-think-USP REAL.3M-think-NPST=MUT=TAG REAL.3M-think-USP	‘the man’s thinking’	JL, JRB1-049-01, 00.49.24-00.50.06	present	elicitation (translation task)			JL: ‘yeah that's right, neng- yeah, he's thinking, that man is thinking, naka nenəngkwarba nengkirrkajama, or nakəna nenəngkwarba nengkirrkajawiya, he's thinking, like nengkirrkajawiya, or nakəna nenəngkwarba nengkirrka, he's..’
mebi	sing	activity	CUM	n	y	IMPFV	x	x	x	x	Backgr	present	∅?	V1-∅		n-akəna nenəngkwarba nə-mebu-Ø=ma	3M-that 3M.man REAL.3M-sing-USP=MUT	‘the man is singing’	JL, JRB1-049-01, 00.25.23-00.25.50	present	elicitation (translation task)			JL: ‘he sang a song, nəmebuma, nəmebuma, it's singing. Yeah, that man is singing, yeah nakəna nenəngkwarba nəmebuma, he was singing, yeah, he [is] singing, like he's singing now, nakəna nenəngkwarba nəmebuma’
mureye	be.hungry	Unbounded CoS	CUM SCAL	open relative	n	IMPFV	x	x	x	x	Backgr	present	∅	V1-∅	Cofs root in fact	abərruwa narra-mərndakə-murey-mureya-Ø	3A.PRO REAL.3A-many-REDUP-be.hungry-USP	‘They getting [really] hungry’	JL, fieldnotes, 19/11/2018	present	elicitation (translation task)
alyadhə	hang	state	CUM STATE	n	n?	IMPFV	x	x	x	x	Backgr	present	∅	V1-Ø		n-aka nenəngkwarba n-alyadhə-Ø=ma	3M-this 3M.man REAL.3M-hang-USP=MUT	‘he['s] just hanging’	JL, JRB1-022-01, 00.03.53-00.04.00	present	elicitation (video stimuli)
alyadhə	hang	state	CUM STATE	n	n?	IMPFV	x	x	x	x	Backgr	present	∅	V1-Ø		n-alyadhə-Ø=ma	REAL.3M-hang-USP=MUT	‘[he’s] hanging’	JL, JRB1-022-01, 00.04.18-00.04.23	present	elicitation (video stimuli)
dhəka-junga	be.closed [+REFL]	state	CUM STATE	dna	n	IMPFV	x	x	x	c	Backgr	present	TempShift DiscCon	V0-PST akwa V1-∅		akəna door=a na-ngwudhangmə-nə=ma akwa na-dhəka-jung-Ø=ma	NEUT.that NEUT.door=PF NEUT-be.open-PST=MUT and REAL.NEUT-close-REFL-USP=MUT	‘The door was open, and [now] it’s closed’	JL, JRB1-023-01, 00.01.25-00.01.37	present	elicitation (video stimuli)
kukwangba	be.excited; get.excited	state	CUM STATE	dna (open relative)	n	IMPFV	x	x	x	x	Backgr	present	∅	V1-∅		“nə-kukwangba-Ø=mərra y-aka yimarndakuwaba. nungkwa=lhangwa”	REAL.3M-be.excited-USP=MUT MASC-that MASC.blue.tonged.lizard 2.PRO=POSS	“He is so excited about this blue-tongued lizard. It's yours!”	Kwurrirda Kwurrirda-langwa, A3369a Side1 a3.3	present	narrative
mureye	be.hungry	state	CUM STATE	dna	n	IMPFV	x	x	x	x	Backgr	present	∅?	V1-Ø		ngayuwa ngu-məreya-Ø anhəngu=wa	1.PRO REAL.1-be.hungry-USP food=ALL	‘I’m hungry for food’	JL, JRB1-050-01, 00.15.27-00.15.32	present	elicitation (video stimuli)
mureye	be.hungry	state	CUM STATE	dna	n	IMPFV	m	x	x	x	Backgr	present	PrMod	adhuwaba V1-Ø		adhuwaba n-aka nenəngkwarba nu-məreya-Ø	today 3M-this 3M.man REAL.3M-be.hungry-USP	‘Today the man’s hungry’	JL, JRB1-050-01, 00.16.29-00.16.32	present	elicitation (video stimuli)
mureye	be.hungry	state	CUM STATE	dna	n	IMPFV	x	x	x	x	Backgr	present	∅?	V1-Ø		n-angaba nenəngkwarba nu-mrey-Ø=dha	3M-that.one 3M.man REAL.3M-be.hungry-USP=TRM	‘that man, he’s hungry’	JL, JRB1-050-01, 00.19.05-00.19.13	present	elicitation (video stimuli)
mureye	be.hungry	state	CUM STATE	dna	n	IMPFV	x	x	x	x	Backgr	present	∅			ngu-mreya-ngu-ma, past, ngu-məreya-Ø, now, ngu-mreye-na, in the middle	REAL.1-be.hungry-PST=MUT REAL.1-be.hungry-USP REAL.1-be.hungry-NPST	missing translation	JL, JRB1-050-01, 00.15.46-00.15.54	present	elicitation (video stimuli)
ngwədhangma	be.open	state	CUM STATE	n	n	IMPFV	x	x	x	x	Backgr	present	∅	V1-Ø		na-ngwədhangma-Ø	REAL.NEUT-be.open-USP	‘the door is open’	JL, JRB1-023-01, 00.02.10-00.02.16	present	elicitation (video stimuli)
ngwədhangma	be.open	state	CUM STATE	n	n	IMPFV	x	t	x	c	BackFore+TempShift	present	TempShift DiscCon-PST	V1-Ø akwa V2-PST	temporal switch!	akəna door-a na-ngwudhangma-Ø akwa na-dhəka-jungu-nə-ma	NEUT.that NEUT.door REAL.NEUT-be.open-USP and REAL.NEUT-be.closed-REFL-PST=MUT	‘the door is open, and then it got shut’	JL, JRB1-023-01, 00.01.54-00.02.02	present	elicitation (video stimuli)
bulwanda	bend.down	accomplishment	I INCR	closed max	y	IMPF	x	t	x	x	Backgr	present	∅	V1-Ø		ne-bulwanda-Ø=ma	REAL.3M-bend.down-USP=MUT	‘[he’s] bending down’	JL, JRB1-023-01, 00.35.26-00.35.32	present	elicitation (video stimuli)
ardija-ja	call(someone)	iterated achievement	PLUR UBD ACH	dna	y	IMPFV	x	x	x	r	Back/Explanation	present	Question - PR	V-1-PST V0-PST V1-∅	Perfect-inferential context	aba ni-yamarrka-Ø-me=ka n-aka, ni-yamarrka-Ø-murra=bena n-ardija-ju-Ø-murra?	NEUT.that.over.there REAL.3M-doing.what-PST=MUT=EMPH 3M-this REAL.3M-doing.what-PST=MUT=EMPH REAL.3M-call-USP=MUT	“Oh! What's happened to him, what is he calling for?”	Kwurrirda Kwurrirda-langwa, A3369a Side1 a3.3	present	narrative
anga	bite	iterated achievement	PLUR UBD ACH	n	y	IMPFV	m	x	x	x	Backgr	present	PrMod	enenuwiya V1-∅	possibly a translation issue here…	enenuwiya wurr-akəna wurruwarda nan-anga-Ø n-akəna nenjarrngalya	now COLL-that COLL.dog REAL.COLL>3M-bite-USP 3M-that 3M.boy	‘The dog is biting the boy now’	ST, JRB1-054-01, 00.13.10-00.13.14	present	elicitation (flash card stimuli)
anga	bite	iterated achievement	PLUR UBD ACH	n	y	IMPFV	x	x	x	x	Backgr	present	∅?	V1-∅	possibly a translation issue here…	nənenəngkwarba nəm-anga-Ø=ma muwadha	3M.man REAL.3M>VEG-bite-USP=MUT VEG.dilly.bag	he's biting the dilly bag’	ST, JRB1-057-01, 00.02.26-00.02.47	present	elicitation (translation task)
dhərra	shut; close	accomplishment	Q INCR	closed	y	PFV? IMPFV?	x	x	x	x	Narr? Backgr?	present	∅?	V1-∅	Perfective present?	n-akəna nenəngkwarba nə-dhərrə-Ø=ma akəna door=a	3M-that 3M.man REAL.3M>NEUT-shut-USP=MUT NEUT.that NEUT.door=PF	‘The man closes the door’	JL, JRB1-049-01, 00.31.23-00.31.30	present	elicitation (translation task)
dhərra	shut; close	accomplishment	Q INCR	closed	y	PFV? IMPFV?	x	x	x	x	Narr? Backgr?	present	∅?	V1-∅	Perfective present?	n-akəna nenəngkwarba nə-dhərru-Ø=ma akəna door=a	3M-that 3M.man REAL.3M>NEUT-shut-USP=MUT NEUT.that NEUT.door=PF	‘The man closes the door’	JL, JRB1-049-01, 00.30.49-00.30.59	present	elicitation (translation task)
dhərra	shut; close	accomplishment	Q INCR	closed	y	PFV? IMPFV?	x	x	x	x	Narr? Backgr?	present	∅?	V1-∅	Perfective present?	nə-dhədhə-Ø=ma	REAL.3M>NEUT-shut-USP=MUT	‘He closes the door’	JL, JRB1-049-01, 00.31.33-00.31.36	present	elicitation (translation task)
dhərra	shut; close	accomplishment	Q INCR	closed	y	IMPFV	x	x	hi	g	Backgr	present	AspMod Hab/Iter	arngkababərnama ('all.the.time/many.time') V1-∅		n-akəna nenəngkwarba arngkababərnama nə-dhədhə-Ø=ma door=a	3M-that 3M.man always REAL.3M>NEUT-shut-USP=MUT NEUT.door=PF	‘[He’s] shutting the door’	JL, JRB1-049-01, 00.31.54-00.32.14	present	elicitation (translation task)
dhərra	shut; close	accomplishment	Q INCR	closed max	y	IMPFV	m	x	x	x	Backgr	present	PrMod	adhənuba V1-∅		n-akəna nenəngkwarba adhənuba nə-dhədhə-Ø=ma door=a akəna door=a	3M-that 3M.man today REAL.3M>NEUT-shut-USP=MUT NEUT.door=PF NEUT.that NEUT.door=PF	‘Today the man is shutting the door’	JL, JRB1-049-01, 00.36.03-00.36.16	present	elicitation (translation task)
dhərra	shut; close	accomplishment	Q INCR	closed max	y	IMPFV	x	x	x	x		present	∅?	V1-∅		nə-dhədha-ngu=ma, that's past, nə-dhə-dhu=ma, that's now	3M.REAL-shut-PST=ma 3M.REAL-shut-0=ma		JL, JRB1-049-01, 00.33.03-00.33.10	present	elicitation (translation task)			JL asked ‘nədhəma door=a, it's present or past?’ JL replies ‘present’. JL then asked ‘can it be past as well, or is it always present?’ JL replies ‘always present, I think’ (JL, JRB1-049-01, 00.34.52-00.35.08)
lhəkəraka	build.something	accomplishment	Q INCR	closed max	y	IMPFV	m	x	x	x	Narr	present	PrMod	enenuwiya ('now') V1-∅	Strange rendering. Like a present perfective..	enenu+wiya n-aka nenəngkwarba nə-lhəkəraka-Ø alhəkəra	now+QUANT 3M-this 3M.man REAL.3M>NEUT-build-USP NEUT.house	‘That man builds a house’	JL, JRB1-060-02, 00.00.22-00.00.31	present	elicitation (flash card stimuli)
ngurrkw-arrnga	make.bush.shelter [bush.shelter+cut]	accomplishment	Q INCR	closed max	y	IMPFV	m	x	x	x	Backgr	present	PrMod	adhuwaba V1-∅		adhuwaba n-aka nenəngkwarba nu-ngurrkw-arrnga-Ø amiyerriya	today 3M-that 3M.man REAL.3M-bush.shelter?-cut-USP NEUT.shelter	‘Today he’s making a bush shelter’	JL, JRB1-050-01, 00.26.06-00.26.12	present	elicitation (flash card stimuli)
mebi	sing tr.	accomplishment?	Q INCR	closed max	y	IMPFV	x	x	x	x	Backgr	present	∅?	V1-∅ + Obj		arnkawura n-akəna nenəngkwarba nə-mebu-Ø=ma emeba	one.day 3M-that 3M.man REAL.3M-sing-USP=MUT NEUT.song	‘he [is] singing a song’	JL, JRB1-049-01, 00.27.36-00.28.02	present	elicitation (translation task)			JL: ‘like to me, I heard that man, he was singing, so arnkawura nakəna nenəngkwarba nəmebuma emeba, nəmebuma, he was like sing- he [is] singing, I heard him singing, so nəmebuma, yeah, numebuma, I heard him singing, he was s- I heard him singing a song, so nəmebuma’
dhərra	shut; close	hab accomplishment	STATE HAB	dna	y	IMPFV	x	x	hi	g	Backgr	present	AspMod Hab/Iter	arngkababərnama ('always') V1-∅		arngkababərnama n-akəna nenəngkwarba nə-dhədhə-Ø=ma door=a	always 3M-that 3M.man REAL.3M>NEUT-shut-USP=MUT NEUT.door=PF	‘The man is always shutting the door’	JL, JRB1-049-01, 00.33.27-00.33.35	present	elicitation (translation task)
List of abbreviations
Verb root	Verb root gloss	Aktionsart	Complexity	Scalarity	Control	Viewpoint	Overt presext ix clause	Overt Past tn complex clause / clause chatn	Asp quantif	Temporal succession	Structural context	Example temporal reading	TA context	Overt TA pattern		Example	Example gloss	Example translation	Example source	Example temporal reading	Genre type of example	REAL-V-USP in construction in example?	Modal reading (if relevant)?	Other notes
Verb root	Verb root gloss	Aktionsart	Complexity	Scalarity	Control	Viewpoint	Overt PR marking	Overt past tx clause	Aspect quantifcation	Temporal succession	Structural context		TA context	Overt TA pattern
			PLUR ACT: pluractional	n: none	no : no	PFV perfective	x: no	m : modtfter	i: iterative (reduplication)	x: unspecified	Backgrd: Background		SoE = sequence of event content	V2, V3... : following verbs
			CUM: cumulative	b: binary	y : yes	IMPF: imperfective	m: modifier	t : tnflectton	h: habitual	p: parataxis	Narr : Narration		PST prompt = past prompt	V1 : annotated verb
			ATM: atomic	closed max: closed scale with maximal standard of comparison		IMPF/PFV = ambiguous	ctx: context	x : unspecified for past	d: durative	o: overlap (multiple events)	ForeBack: Bacgrd Backwards		DiscCon : discourse connective	…, V-1, V0 : previous verb
			AMT PREP: atomic with preparatory stage	open scale					l: lli	c: connective imposing temporal ordering	BackFore: Bacgrd Forwards			V0 >> V1 = V0-clause dominates V1-clause
			ATM GROUP: atomic with group subject referent (complex referent, but no incremental reading)							clit: temporal clitic (subordinator	TempShift: 'forced' temporal shift with e.g. 'then'		Hab: habitual
			I Incr: non-tomic with intensity scale (no incremental theme)							it: sequence of iterated events			Coord PST : V-Ø coordinated with V-PST
			Q Incr: non-atomic with incremental theme							co: connective with overlap (FBP)			Iter: terative
			ATM INCH : inchoative atomic events							r: resultative			LLI<SoE: LLI followed by SOE
			SEMELF BD: bounded semelfactive (pluractional)							cons: construction			LLI>SoE SoE triggered by LLI
										lli: event bounded on the right or left by lli			AspClit: aspectual clitic
													CausSub: causal subordinate clause
													Matrix-ST> ObjCl: past matrix clause dominates (zero-marked) complement clause
													<DiscCon: followed by a discourse connective
													SoE-PST (DiscCon/parataxis): first or previous segment of the SoE is marked in the past	Perf matrix >
													Overlap-PST: backgrounded clause is in the past
													SoE DiscCon/parataxis-PST: subsequent segment(s) in SoE appear(s) in the past
													DiscCon SoE : discourse connective precedes USP segment
													Sim: simultaneous events
													TempShift: discontinuous states

## Sheet: For copying and pasting
adhərrə	spear; pierce	achievement	ATM	b	y	PFV	x	x	x	c	Narr	past	SoE DiscCon	POSS akena V0-∅ biya V1-∅		en=lhang=manja ayerrka akena n-andheya biya n-adharrə-Ø=ma jurra=manja	3M.PRO=POSS=LOC NEUT.hand but 3M-look.around.PST and.then REAL.3M>NEUT-spear-USP=MUT NEUT.book=LOC	‘[he was holding the knife] in his hand, he looked around and then he speared the paper’	JL, JRB1-029-03, 00.07.34-00.07.48	past	elicitation (video stimuli)
adhərrə	spear; pierce	achievement	ATM	b	y	PFV	x	t	x	c	BackFore	past	SoE-PST DiscCon-PST	yarrungkwa V0-PST akwa V1-Ø	Backgr on 1s V 'holding'	yarrungkwa maməwəra=manja n-aka nenəngkwarba nu-wilyaka-Ø=ma lyelyinga akwa n-adharra-Ø jurru=manja	yesterday VEG.day=LOC 3M-this 3M.man REAL.3M>NEUT-hold-PST=MUT NEUT.knife and REAL.3M>NEUT-spear-USP NEUT.paper=LOC	‘yesterday morning the man was holding a knife and speared the paper’	JL, JRB1-029-03, 00.08.53-00.09.09	past	elicitation (video stimuli)
adhərrə	spear; pierce	achievement	ATM	b	y	PFV	x	t	x	c	BackFore	past	SoE-PST DiscCon	V0-PST akwa V1	Backgr on 'holding'	ni-lyinga-Ø=ma akəna lyelyinga en=lhang=manja ayerrka akwa n-adharra-Ø jurra=manja	REAL.3M>NEUT-hold-PST=MUT but NEUT.knife 3M.PRO=POSS=LOC NEUT.hand and REAL.3M>NEUT-spear-USP paper=LOC	‘he was holding the knife in his hand and speared the paper’	JL, JRB1-029-03, 00.09.27-00.09.33	past	elicitation (video stimuli)
adhərrə	spear; pierce	achievement	ATM	b	y	PFV	x	x	x	x	Narr	past	∅?	V1-∅	ach due to object dimensionality	n-adhərra-Ø=m akən jurra n-akən nanəngkwarba	REAL.3M>NEUT-spear-USP=MUT NEUT.that NEUT.paper 3M-that 3M.man	‘The man speared the paper’	ST, JRB1-037-01, 00:22:31-00:22:35	past	elicitation (video stimuli)
adhərrə	spear; pierce	achievement	ATM	b	y	PFV	x	x	x	x	Narr	past	∅?	V1-∅	ach due to object dimensionality	adhuwaba n-akən nanəngkwarba n-adhərra-Ø=m akən jurra lyelyingama	today 3M-that 3M.man REAL.3M>NEUT-spear-USP=MUT NEUT.that NEUT.paper MASC.knife	‘Today the man speared the paper with a knife’	ST, JRB1-037-01, 00:22:55-00:23:00	past	elicitation (video stimuli)
adhərrə	spear; pierce	achievement	ATM	b	y	PFV	x	t	x	c	Narr	past	DiscCon SoE	arakba V1-∅		arakba n-ardhərra-Ø n-akəna akwərrerrikba	COMPL.ACT REAL.3M>NEUT-spear-USP 3M-that NEUT.harpoon	‘Then he grabbed a spear (one of the men took his harpoon)’	Chasm Island, A3368a Side1, 00:01:25.200 - 00:01:28.030	past	narrative
adhərrə	spear; pierce	achievement	ATM	b	y	PFV	x	t	di	cons	Narr	past	Matrix-PST >> TempSub SoE	V0-PST yanda=lhangwa ('until') >> V1-∅		na-rukwu-lyuwake-na yanda=lhangwa nuw-ardhərra-Ø=dha	REAL.3A-body-spin-PST nothing=ABL[until] REAL.3A>NEUT-spear-USP=EMPH	‘It went round and round, until it dropped (in the sea)’	Chasm Island, A3368a Side1, 00:01:35.525 - 00:01:38.025	past	narrative
akburranga	find; reach	achievement	ATM	b	n	PFV	x	t	x	c	Narr	past	SoE-PST DiscCon	V1-PST akena V2-∅		n-aka nenəngkwarba n-aburəngke-nə=ma akena n-ang-akburranga-Ø	3M-that 3M.man REAL.3M-look.for-PST=MUT but REAL.3M-3F-find-USP	‘The man was looking for her, and he found her’	JL, JRB1-064-01, 00.21.11-00.21.17	past	elicitation (flash card stimuli)
akburranga	find; reach	achievement	ATM	b	n	PFV	x	t	x	c	Narr	past	SoE-PST DiscCon	V1-PST akwa V2-∅		n-akəna nenəngkwarba n-abərengke-nə=ma en=lhangwa warijura akwa nen-akbərranga-Ø	3M-that 3M.man REAL.3M>COLL-look.for-PST=MUT 3M.PRO=POSS COLL.child and REAL.3M>COLL-find-USP	‘The man was looking for his kids, and he found them’	JL, JRB1-034-01, 00.21.57-00.22.13	past	elicitation (translation task)
akburranga	find; reach	achievement	ATM	b	n	PFV	x	t	x	p	Narr	past	SoE-PST parataxis	V0-PST V1-∅		narrə-mirku-warrukwa-Ø narrə-m-akbərranga-Ø m-akəna	REAL.3A-neck-cross-PST REAL.3A-VEG-find-USP VEG-that	‘they crossed (a point of land) and they found/reached [it]’	Chasm Island, A3368a Side1, 00:01:19.965-00:01:22.815	past	narrative
akburranga	find; reach	achievement	ATM	b	n	PFV	x	m	x	x	Narr	past	PstMod	yarrungkwa V1-∅		yarrungkwa n-akən nenəngkwarrba nəm-akbərranga-Ø=ma mijiyelya	yesterday 3M-that 3M.man REAL.3M>VEG-find-USP=MUT VEG.beach	‘Yesterday he found the beach’	JL, JRB1-018-01, 00.05.31	past	elicitation (translation task)
akuma	put	achievement	ATM	b	y	PFV	x	x	x	p	Narr	past	SoE parataxis	V1-∅ V2-∅		narrə-m-akuma-Ø libaliba narrə-m-arungku-wurra-Ø	REAL.3A-VEG-put-USP VEG.canoe REAL.3A-VEG-anchor(?)-throw-USP	‘they left the libaliba and they walked (and) threw out the anchors’	Chasm Island, A3368a Side1, 00:01:11.660 - 00:01:15.035	past	narrative
ambarr-nga	stand up	achievement	ATM	b	y	PFV	x	t	x	c	Narr	past	SoE DiscCon-IRR.PST	V-1-∅ akwa V0-∅ akwa kamba V1-∅ V2-∅ V3-IRR-PST	CofS affix +-∅ or did you change your mind? Anin texts is rather: 'he came and sat down, sneezed, then stood up and walked away'	n-akən nanəngkwarba nə-lhəka-Ø=ma n-ambarr-nga=ma akən-manja chair=a akwa nə-mədhilyakbə-Ø-ma akwa kamba nə-kw-aji-nga=ma kənə-lhəka-nə=ma	3M-that 3M.man REAL.3M-go-USP=MUT REAL.3M-sit-CofS=MUT NEUT.that=LOC chair=PF and REAL.3M-cough-USP=MUT and then REAL.3M-half(?)-be.upright-CofS=MUT IRR.3M-go-PST=MUT	‘he stood up, coughed, and walked away’	ST, JRB1-037-01, 00:31:11-00:31:21	past	elicitation (video stimuli)
anga	bite	achievement	ATM	b	y	PFV	x	m	x	x	Narr	past	PstMod	yarrungkwa V1-∅		yarrungkwa wurr-akəna wurruwarda nan-anga-Ø n-akəna nenjarrngalya	yesterday COLL-that COLL.dog REAL.COLL>3M-bite-USP 3M-that 3M.boy	‘Yesterday the dog bit the boy’	ST, JRB1-054-01, 00.13.10-00.13.14	past	elicitation (flash card stimuli)
anga	bite	achievement	ATM	b	y	PFV	x	m	x	x	Narr	past	PstMod	arakbəwiya V1-∅		arakbəwiya wurr-akəna wurruwarda nan-anga-Ø=ma n-akəna nenjarrngalya	long.ago COLL-that COLL.dog REAL.COLL>3M-bite-USP=MUT 3M-that 3M.boy	‘Long time ago the dog bit the boy’	ST, JRB1-054-01, 00.14.11-00.14.18	past	elicitation (flash card stimuli)
anga	bite	achievement	ATM	b	y	PFV	x	m	x	x	Narr	past	PstMod	yarrungkwa V1-∅		yarrungkwa wurr-akəna wurruwarda nan-anga-Ø=mərra n-akən=manja nanjarrngalya	yesterday COLL-that COLL.dog REAL.COLL>3M-bite-USP=MUT 3M-that=LOC 3M.boy	‘Yesterday the dog bit the boy’	ST, JRB1-054-01, 00.12.06-00.12.12	past	elicitation (flash card stimuli)			When considering the difference between nanangama and nanangamərra, and after producing the form nanangamərra several times and apparently acknowledging it, ST says ‘I would never say nanangamərra, never, doesn't sound right to me. Some people might use it, it is used, but I'd prefer to say- I reckon this sounds right [with =ma]. Yarrungkwa wurrakəna wurruwarda nanangama nakəna nenjarrngalya, tha…
angkarrə	run	achievement	ATM	b	y	PFV	x	t	x	cc	BackFore + SoE	past	PST-SoE DiscCon	V0-IRR.PST akena V1-∅ akwa V2-∅	Avertive; 'was going/about to leave' might be closer to the mark	nganyangwa nabə-rraka kənə-lhəka-rni=yedha akena enlhangwa nenmamalya n-angkarr-Ø angaluba dirak=uma akwa ni-yama-Ø ni-yengba-Ø nenu-maka-Ø nungkuwa Ø-ambilya nara a-lhəka-ma	1.PRO.POSS 3M.son-1.KIN IRR.3M-go-PST=PURP but 3M.PRO.POSS 3M.person REAL.3M-run-USP from.over.there VEG.car=INST and REAL.3M-speak-USP REAL.3M-talk-USP REAL.3M>3M-say-USP 2.PRO DEON.2-stay.NPST NEG NEG.NPST-go-NEG.NPST	‘My son nearly left, however a man came from over there in a car and told him “stay, don’t go”’	JL, JRB1-075-01, 00:10:40.510-00:11:02.885	past	elicitation (translation task)
angurrkwuru-da	curve; bend; go.around.corner	achievement	ATM	b	y	PFV	x	x	x	c	Narr	past	LocMod	yadəkəna ('from there') V1-Ø		yadəkəna ngalh-aja n-angurrkwuru-da-Ø angamba biya alyuwangmanja	from.there NEUT.PRO-CofR REAL.NEUT-corner-INCH-USP where and.then place.name	‘from there, they went around the corner, and there that place is Alyuwangmanja’	MM, JRB1-005-01, 00.00.58-00.01.03	past	narrative
arungku-wurra	throw.anchor	achievement	ATM	b	y	PFV	x	x	x	p	Narr	past	SoE parataxis	V0-∅ V1-∅		narrə-m-akuma-Ø libaliba narrə-m-arungku-wurra-Ø	REAL.3A-VEG-put-USP VEG.canoe REAL.3A-VEG-anchor(?)-throw-USP	‘they left the libaliba and they walked (and) threw out the anchors’	Chasm Island, A3368a Side1, 00:01:11.660 - 00:01:15.035	past	narrative
errikbə	throw	achievement	ATM	b	y	PFV	x	x	x	x	Narr	past	SoE DiscCon	V0 akwa V1		n-aka nenəngkwarba nəmə-wilyaka-Ø=ma malarra ayerrk=manja akwa n-errikba-Ø, n-errikbu-Ø=ma	3M.this 3M.man REAL.3M>VEG-hold-PST=MUT VEG.rock NEUT.hand=LOC and REAL.3M-throw-USP REAL.3M-throw-USP=MUT	‘the man was holding the rock in his hand and threw it’	JL, JRB1-029-03, 00.10.43-00.11.06	past	elicitation (video stimuli)
errikbə	throw	achievement	ATM	b	y	PFV	x	x	x	x	Narr	past	∅?	V1-Ø		n-errikbu-Ø-ma malarra	REAL.3M-throw-USP=MUT VEG.rock	‘[he] threw the rock’	ST, JRB1-029-03, 00.12.09-00.12.13	past	elicitation (video stimuli)
errikbə	throw	achievement	ATM	b	y	PFV	x	tm	x	co	BackFore	past	PstMod Overlap-PST SoE DiscCon	V0-PST kembərra V1-∅		n-akəna nanəngkwarba ma-lyinga-Ø m-akən malarra kembərra n-errikbu-Ø-ma	3M-that 3M.man REAL.(3M)>VEG-hold-PST VEG-that VEG.stone then REAL.3M-throw-USP	‘The man was holding the stone and then threw it’	ST, JRB1-037-01, 00:42:52-00:43:01	past	elicitation (video stimuli)
errikbə	throw	achievement	ATM	b	y	PFV	x	tm	x	co	BackFore	past	PstMod Overlap-PST SoE DiscCon	V0-PST akwa V1-∅		n-akəna nenəngkwarba nəm-alyinga-Ø malarra akwa n-errikbu-Ø=ma	3M-that 3M.man REAL.3M>VEG-hold-PST VEG.stone and REAL.3M-throw-USP=MUT	‘The man was holding the stone and he threw it’	CW, JRB1-037-01, 00:43:02-00:43:11	past	elicitation (video stimuli)
errikbə	throw	achievement	ATM	b	y	PFV	x	tm	x	co	BackFore	past	PstMod Overlap-PST SoE DiscCon	yarrungkwa V0-PST V0'-PST akwa V1-∅		yarrungkwa n-aka nanəngkwarba nu-kw-ajey=ma nəm-ayinga-Ø malarra akwa n-errikbu-Ø=ma	yesterday 3M-this 3M.man REAL.3M-half(?)-be.upright.PST=MUT REAL.3M>VEG-hold-PST VEG.stone and REAL.3M-throw-USP=MUT	‘Yesterday the man was standing holding the stone, and threw it’	ST, JRB1-037-01, 00:43:26-00:43:38	past	elicitation (video stimuli)
errikbə	throw	achievement	ATM	b	y	PFV	x	t	x	c	Narr	past	DiscCon SoE DiscCon-PST	akwa arakba V1-∅ V1'-∅ akwa V2-PST		akwa arakba n-errikbə(?)-Ø n-errikbə-Ø akina akwa n-ərrəngka-Ø arakba	and COMPL.ACT REAL.3M>NEUT-throw-USP REAL.3M>NEUT-throw-USP NEUT.that and REAL.3M-look-PST COMPL.ACT	‘and he threw it. He threw it and he saw/watched it (the spear)’	Chasm Island, A3368a Side1, 00:01:28.720 - 00:01:33.075	past	narrative
errikbə	throw	achievement	ATM	b	n	PFV	x	x	x	c	Narr	past	SoE DiscCon	V1-∅ akena V2-∅		n-aka nenəngkwarba n-errikbi-Ø=yedha akəna dart ekena nu-kwiyarrba-Ø	3M-that 3M.man REAL.3M-throw-USP=PURP NEUT.that NEUT.dart but REAL.3M-miss-USP	‘He threw the dart, but missed’	JL, JRB1-075-01, 00:13:52.495-00:13:58.895	past	elicitation (translation task)
jerrədhə	get finished; become finished; be finished	achievement	ATM	b	y	PFV	x	t	rl	cp::	Narr	past	AspMod SoE-PST XTD DiscCon	ngawa (cont.act) V0-XTD-PST eken V1-Ø	not sure about gloss for RED - XTD?	ni-yen-jem-Ø ngaw n-a:::dhərra-Ø=m akən jurra ekena ne-jerrədhə-Ø=m akən jurr- jurra kemba nara=b kən-adhərre-na	REAL.3M-REDUP-do-PST cont.act REAL.3M>NEUT-XTD.pierce-USP=MUT NEUT.that NEUT.paper but REAL.3M-be.finished-USP=MUT NEUT.that NEUT.paper NEUT.paper then NEG=EMPH IRR.3M-pierce-PST	‘He kept on piercing the paper bag, but then he finished, then he didn’t pierce [it] anymore’	ST, JRB1-037-01, 00:25:09-00:25:18	past	elicitation (video stimuli)
jerrədhə	get finished; become finished; be finished	achievement	ATM	b	y	PFV	x	t	x	c	BackFore	past	Overlap-PST DiscCon + AspMod	angkwabəbərn=lhanga ('all day long') V0-PST eken V1-Ø		n-aka nenəngkwarba angkwabəbərn=lhanga n-adhərra-ngu=ma akəna jurra eken nara=ba nə-jerrədha-Ø	3M-that 3M.man all.day=ABL REAL.3M>NEUT-pierce-PST=MUT NEUT.that NEUT.paper but NEG=EMPH REAL.3M-be.finished-USP	‘He was piercing the bag all day, but then he finished’. (what about nara???)	CW, JRB1-037-01, 00:26:14-00:26:26	past	elicitation (video stimuli)
jungwa	die	achievement	ATM	b	n	PFV?	x	x	x	x	Narr?	past	∅? (or SoE parataixis?)	V1-∅		ni-jungwa-Ø	REAL.3M-die-USP	‘that man, he died’	JL, JRB1-049-01, 00.46.49-00.47.01	past	elicitation (translation task)
jungwa	die	achievement	ATM	b	n	PFV?	x	x	x	x	Narr?	past	∅? (or SoE parataixis?)	V1-∅		n-akəna nenəngkwarba ni-jungə-Ø=ma, n-akəna nenəngkwarb ni-jungu-Ø=ma	3M-that 3M.man REAL.3M-die-USP=MUT 3M-that 3M.man REAL.3M-die-USP=MUT	‘he passed away’	JL, JRB1-049-01, 00.47.04-00.47.16	past	elicitation (translation task)
jungwa	die	achievement	ATM	b	y	PFV	x	x	x	c	Narr	past	DiscCon SoE	akena V1-∅		akena n-enəng-arijira=ma ngəwa ni-jungwu-Ø=ma en-ejə-kwaba n-akəna	however 3M-M.ALP-child=PRIV CONT.ACT REAL.3M-die-USP=MUT 3m.PRO-CofR-also 3M-that	‘But he died too, without having any children’	Bible Society in Australia 1992: 822	past	narrative (text translation)
kw+arrangə	cut	achievement	ATM	b	y	PFV	x	m	x	x	BackFore	past	PstMod	yarrungkwa V1-Ø	Backgr on 'holding'	yarrungkwa n-akəna nenəngkwarba nu-wilyaka-Ø=ma a-ki-ngkarrnga en=lhang=manja ayerrka akəna a-ki-ngkarrnga akwa nu-kw+arrangu-Ø=ma amamərarra	yesterday 3M-that 3M.man REAL.3M>NEUT-hold-PST=MUT NEUT-NSR-cut 3M.POSS=LOC NEUT.hand NEUT.that NEUT-NSR-cut and REAL.3M>NEUT-half+cut-USP=MUT NEUT.stick	‘Yesterday the man was holding the knife in his hand and cut the stick’	JL, JRB1-029-01, 00.02.40-00.03.16	past	elicitation (video stimuli)
kw+arrangə	cut	achievement	ATM	b	y	PFV	x	m	x	x	Narr	past	PstMod	yarrungkwa V1-Ø		yarrungkwa n-akəna nenəngkwarba nu-kw+arrangu-Ø=ma amamərarra eyika en=lhangə-ma alhəka	yesterday 3M-that 3M.man REAL.3M>NEUT-half+cut-USP=MUT NEUT.stick NEUT.tree 3M.PRO=POSS=INST NEUT.foot	‘Yesterday the man cut the stick with his foot’	JL, JRB1-029-01, 00.04.18-00.04.37	past	elicitation (video stimuli)
kw+arrangə	cut	achievement	ATM	b	y	PFV	x	m	x	x	Narr	past	PstMod	yarrungkwa V1-Ø		yarrungkwa n-aka nenəngkwarba nu-kw+arrangu-Ø=ma akəna amamərarra ayika en=lhangə=ma alhəka	yesterday 3M-that 3M.man REAL.3M>NEUT-half+cut-USP=MUT NEUT.that NEUT.stick NEUT.tree 3M.PRO=POSS=INST NEUT.foot	‘Yesterday the man cut the stick with his foot’	JL, JRB1-029-01, 00.07.11-00.07.18	past	elicitation (video stimuli)
kw+arrangə	cut	achievement	ATM	b	y	PFV	x	x	x	x	Narr	past	∅?	V1-∅	ach due to object dimensionality	n-akəna nenəngkwarba nu-kw+arrangu-Ø=ma ayika	3M-that 3M.man REAL.3M>NEUT-half+cut-USP=MUT NEUT.tree	‘The man cut the stick’	CW, JRB1-032-01, 00.01.17	past	elicitation (translation task)
kwa+bijanga	jump	achievement	ATM	b	n	PFV	x	t	l	lli	Narr	past	XTD-PST AspMod < SoE	V0-PST:::=wa V1-∅		n-angkarrə-nə-mərru:::=wa, nu-kwa+bijanga-Ø ayika=manja	REAL.3M-run-PST=MUT.XTD=PL REAL.3M-jump-USP NEUT.tree=LOC	‘He kept on running (until) he jumped behind a tree’	GL, A3369a Side1, a3.3 Kwurrirda Kwurrirda	past	narrative
kwiyerrba	miss	achievement	ATM	b	n	PFV	x	x	x	x	Narr	past	SoE parataxis?	V1-∅		n-aka nanəngkwarba nu-kwiyerrba-Ø akəna enungkwa	3M-this 3M.man REAL.3M>NEUT-miss-USP NEUT.that NEUT.spear	‘The man missed the spear’	ST, JRB1-051-01, 00.29.44-00.29.50	past	elicitation (flash card stimuli)
kwiyerrba	miss	achievement	ATM	b	n	PFV	x	x	x	x	Narr	past	∅? SoE parataxis?	V1-∅		n-akən James=a nu-kwiyerrba-Ø y-akəna yimendha	3M-that James=PF REAL.3M>MASC-miss-USP MASC-that MASC.turtle	‘James missed the turtle’	ST, JRB1-051-01, 00.30.23-00.30.34	past	elicitation (flash card stimuli)			When asked what ‘nakəna nenəngkwarba nukwiyerrba yakəna yimendha’ means, ST replies ‘that man missed the turtle’. Then asked following up ‘so missed? in the past?’ ST says ‘missed, yeah’.
kwiyerrba	miss	achievement	ATM	b	n	PFV	x	x	x	c	Narr	past	DiscCon SoE	V0-∅ akena V1-∅		n-aka nenəngkwarba n-errikbi-Ø=yedha akəna dart ekena nu-kwiyarrba-Ø	3M-that 3M.man REAL.3M-throw-USP=PURP NEUT.that NEUT.dart but REAL.3M-miss-USP	‘He threw the dart, but missed’	JL, JRB1-075-01, 00:13:52.495-00:13:58.895	past	elicitation (translation task)
larrka	send	achievement	ATM	b	y	PFV	x	x	x	x	Narr	past	SoE (parataxis?)	V1-∅	ABL plays a role?	narri-larrka-Ø angaluba ayakwa Umbakumba=lhangwa	REAL.3A>NEUT-send-USP from.there NEUT.language Umbakumba=ABL	‘Then from Umbakamba the people send a message from there’	Akingambaja-langwa [=About Washing Ceremony], A3370a SIDE1 a5.3	past	narrative
lekbu	blame	achievement	ATM	b	y	PFV	x	x	x	x	Narr	past	∅?	V1-∅	verbum dicendi = achievement	n-aka nanəngkwarba nen-lekbu-Ø=ma n-aka nenjarrngalya	3M-that 3M.man REAL.3M>3M-blame-USP=MUT 3M-that 3M.boy	‘the man accused the boy’	ST, JRB1-051-01, 00.19.41-00.20.01	past	elicitation (translation task)
lekbu	blame	achievement	ATM	b	y	PFV	x	x	x	x	Narr	past	∅?	V1-∅	verbum dicendi = achievement	nen-lekbu-Ø=ma	REAL.3M>3M-blame-USP=MUT	‘he accused him’	ST, JRB1-051-01, 00.19.41-00.20.01	past	elicitation (translation task)
lharrə	fall	achievement	ATM	b	y	PFV	x	x	x	x	Narr	past	∅?	V1-∅		n-akəna nenəngkwarba nə-lharra-Ø	3M-that 3M.man REAL.3M-fall-USP	‘that man fall down’	JL, JRB1-049-01, 00.40.50-00.40.56	past	elicitation (video stimuli)
lyumadhə	disappear	achievement	ATM	b	n	PFV	x	x	x	x	Narr	past	SoE parataxis?	V1-∅		yarrungkwa n-akəna nenəngkwarba ni-lyumadhə-Ø=ma	yesterday 3M-that 3M.man REAL.3M-disappear-USP=MUT	‘He disappeared’	JL, JRB1-050-01, 00.27.52-00.27.59	past	elicitation (flash card stimuli)
lyumadhə	disappear	achievement	ATM	b	n	PFV	x	t	l	lli	Narr	past	XTD-RED-PST < SoE	V0-RED-PST:::=wa V1-∅		nanga-lhuku-lhukwa-mərrkaju-wa dh-adhə-m-alhəka=lhangwiyu:::=wa yingə-lhəkarrkə-lyəmadha-Ø	REAL.3M>3F-REDUP-tracks-follow-PST 3F-F-INALP-foot=PERL.XTD=PL 3F-tracks-disappear-USP	‘He kept following her tracks until they disappeared’	GL, A3374a Side2, a11.2 Search	past	narrative
marrakaja	grab; take	achievement	ATM	b	y	PFV	x	x	x	x	Narr	past	∅? (but SoE context)	V1-∅		dhədharrəngka yingi-na-marrakaja-Ø akən amdejika	3F.woman REAL.3F-3M-grab-USP NEUT.that NEUT.thing	The woman grabbed the thing from him	ST, JRB1-037-02, 00:14:39-00:14:45	past	elicitation (video stimuli)
marrakaja	grab; take	achievement	ATM	b	y	PFV	x	m	x	x	Narr	past	PstMod	arakb-ərakbəwiya V1-∅		arakb-ərakbəwiya dh-akəna dhədharrəngka yingə-nə-marrakaja-Ø=ma n-akə nanəngkwarba akən ayika	REDUP-long.ago 3F-that 3F.woman REAL.3F-3M-grab-USP=MUT 3M-that 3M.man NEUT.that NEUT.tree	‘Long time ago the woman grabbed the stick from the man’	ST, JRB1-037-02, 00:16:30-00:16:43	past	elicitation (video stimuli)
məra+junga-ja	wake.up.someone	achievement	ATM	b	y	PFV	x	x	x	c	Narr	past	DiscCon SoE	biya V1-Ø		biya n-aka nu-wilyab nenəngkwarba nen-məra+junga-ja-Ø=ma	and.then 3M-this 3M-one 3M.man REAL.3M>3M-wake.up-CAUS-USP=MUT	‘and then he woke him up’	ST, JRB1-029-03, 00.23.31-00.23.38	past	elicitation (video stimuli)
məra+junga-ja	wake.up.someone	achievement	ATM	b	y	PFV	x	t	x	c	BackFore	past	Back-Fore-PST Overlap-PST DiscCon	V0-PST akena V1-∅	Backgr on 'sleeping'	n-aka nenəngkwarba nə-rrak-ajey-mə=na ni-jungu-nə-ma marrnga chair=manja akena nu-wilyaba nenəngkwarba nenu-məra+janga-ja-Ø=ma	3M-this 3M.man 3M-?-be.upright.PST=MUT=TAG REAL.3M-be.tired-PST=MUT VEG.sleep NEUT.chair=LOC but 3M-one 3M.man REAL.3M>3M-wake.up-CAUS-USP=MUT	the man was sleeping in the chair, but the [other] man woke him up’	JL, JRB1-029-03, 00.24.50-00.25.13	past	elicitation (video stimuli)
məra+junga-ja	wake.up.someone	achievement	ATM	b	y	PFV	x	x	x	x	Narr	past	∅?	V1-Ø		n-akəna nu-wilyaba nenəngkwarba nen-məra+janga-ja-Ø=ma	3M-that 3M-one 3M.man REAL.3M>3M-wake.up-CAUS-USP=MUT	‘the man woke him up’	ST, JRB1-029-03, 00.25.58-00.26.04	past	elicitation (video stimuli)
nekibulu	give.up	achievement	ATM	b	y	PFV	x	x	x	c	Narr	past	SoE DiscCon	arakbəwiya V0-∅ kemba V1-∅	PC realis!	arakbəwiya n-aka nenəngkwarba nu-njurr-kwa-ja-Ø=ma akəna fridge=a ekena engkəbərrungwərrungwa or kamba ngə-nekibulu-Ø=m akəna	long.ago 3M-this 3M.man REAL.3M>NEUT-move-CAUS-USP=MUT NEUT.that NEUT.fridge=PF but NEUT.heavy then REAL.3M>NEUT(?)-give.up(?)-USP=MUT NEUT.that	Long time ago the man [tried to] move the fridge, but it was too heavy’ / ‘and so he gave up’	JL, JRB1-038-01, 00:14:43-00:15:08	past	elicitation (video stimuli)
nekibulu	give.up	achievement	ATM	b	y	PFV	x	t	x	co	BackFore	past	Overlap-PST SoE DiscCon	arakbəwiya V-1-IRR-PST akwa V0-IRR-∅ ekena V1-∅		arakbəwiya n-aka nenəngkwarba kənu-jura-ng=yedha akwa kənu-njurru-kwa-ji-Ø=yedh akəna fridge=a ekena nə-nekibula-Ø akwa=ba ə-mdh-akeya=wiya	long.ago 3M-that 3M.man IRR.3M>NEUT-push-PST=PURP and IRR.3M>NEUT-move-CAUS-USP=PURP NEUT.that NEUT.fridge=PF but REAL.3M>NEUT(?)-give.up(?)-USP and=EMPH NEUT-many-that(?)=QUANT	‘Long time ago the man was [trying to] push and move the fridge, but he gave up'	JL, JRB1-038-01, 00:16:14-00:16:34	past	elicitation (video stimuli)
ngambaja	curse(someone/something)	achievement	ATM	b	y	PFV	x	t	ld	c lli	Narr	past	DiscCon-XTD-PST SoE	V0-PST biya:::V1-∅ V2-PST	V0-PST bi:::ya V1-∅	ying-engkəngkərre-na ngalhamba=lhangwa akəna=murradha dh-akəna Wakaba bi:::ya, ngalamba=lhangwa arakba yingənə-ngambaja-Ø dh-akəna yingən-ararika-Ø dhambulu=ma n-akəna	REAL.3F-think-PST 3F.PRO.SEQ=POSS NEUT.that=EMPH 3F-that Wakaba and.then.XTD 3F.PRO.SEQ=POSS COMPL.ACT REAL.3F>3M-curse-USP 3F-that REAL.3F>3M-tie.up-PST NEUT.feather.string=EMPH 3M-that	‘Then Wakaba kept on thinking, then it was her turn, she cursed Nenungwanjirrumiya, she cursed him to the feather string and that feather string had been tied all around him’	Akingambaja-langwa [=About Washing Ceremony], A3370a SIDE1 a5.3	past	narrative
ngk+arrangə	cut	achievement	ATM	b	y	PFV	x	m	x	x	Narr	past	PstMod	yarrungkwa V1-Ø		yarrungkwa n-aka nenəngkwarba ni-ngk+arrənga-Ø nu-kw+arrangu-Ø-ma ni-ngk+arrnga-rnu-ma ene=lhangwa	yesterday 3M-that 3M.man REAL.3M>NEUT-?+cut-USP REAL.3M>NEUT-?+cut-USP=MUT REAL.3M>NEUT-?+cut-USP=MUT 3M.PRO=POSS	‘Yesterday the man cut [the stick with] his foot’	JL, JRB1-029-01, 00.08.01-00.08.23	past	elicitation (video stimuli)
ngkə+lharrə	fall	achievement	ATM	b	y	PFV	x	x	x	x	Narr	past	∅?	V1-∅		n-akəna nenəngkwarba ni-ngkə+lharra-Ø	3M-that 3M.man REAL.3M-?+fall-USP	‘The man fell down’	JL, JRB1-049-01, 00.41.12-00.41.19	past	elicitation (translation task)			JL asked and does that [nakəna nenəngkwarba nəlharra] mean it happened now, or it happened before?’, JL replies ‘happened before’
ngkə+lharrə	fall	achievement	ATM	n	y	PFV	x	t	x	c	BackFore	past	Overlap-PST SoE DiscCon	V0-PST akena V1-∅		n-akəna nenəngkwarba n-angkarrə-nə=manja, n-aka nenəngkwarba n-aka n-aka nenəngkwarba n-əngkarre-na akena ni-ngkə+lharra-Ø karrawara amamərarra=manja ayika	3M-that 3M.man REAL.3M-run-PST=LOC 3m-this 3M.man 3M-this 3M-this 3M.man REAL.3M-run-PST but REAL.3M-?+fall-USP above NEUT.branch=LOC NEUT.tree	‘When the man was running, he fell on the tree branch’	JL, JRB1-033-01, 00.06.11-00.06.46	past	elicitation (translation task)
ngkə+lharrə	fall	achievement	ATM	n	y	PFV	x	t	x	c	BackFore	past	Overlap-PST SoE DiscCon	V0-PST akena V1-∅		n-angkarrə-nə=manja akena ni-ngkə+lharra-Ø karrawara amamərarra-manja ayika	REAL.3M-run-PST=LOC but REAL.3M-?+fall-USP above NEUT.branch=LOC NEUT.tree	‘When he was running, he fell on the tree branch’	JL, JRB1-033-01, 00.07.00-00.07.14	past	elicitation (translation task)
ngkə+lharrə	fall	achievement	ATM	n	y	PFV	x	x	x	x	Narr	past	∅?	V1-∅		n-angaba nenəngkwarba ni-ngkə+, ni-ngkə+lharra-Ø, ni-ngkə+lharrə-Ø=ma	3M-that.one 3M.man 3M-?+, REAL.3M-?+fall-USP REAL.3M-?+fall-USP=MUT	‘The man fell down’	JL, JRB1-049-01, 00.41.50-00.41.55	past	elicitation (translation task)			In response to being asked ‘if I'm falling down and right now you're saying 'James...’ Then asked for clarification, JL is asked ‘if someone says nəlharra it's- he fell down? he's already on the ground?’ and JL replies ‘he f- he fell down, yeah’
ngkə+lharrə	fall	achievement	ATM	b	n	PFV	x	x	x	x	Argu Epist	past	EpistMod	dhukwa V1-∅		dhukwa ne-ngkə+lharra-Ø dhukwa nara akənə=wa dhu nəw-kw-ajiya	maybe REAL.NEUT-?+fall-Ø maybe NEG NEUT.that=ALL maybe REAL.NEUT-half(?)-be.upright.NPST	‘Maybe the tree fell down, maybe it didn’t, maybe it’s still standing’	JL, JRB1-042-01, 00:15:35-00:15:59	past	elicitation (translation task)		epistemic
ngwanja	stop	achievement	ATM	b	n	PFV	x	x	x	lli	Narr	past	SoE DiscCon + XTD	V-1-PST V0-PST biya Npred-XTD V1-∅		wurru-kwala na-jungwee-yi-nə=dha ne-yamin-jamə-na biya yelyukwi::: arrərra nu-ngwanja-Ø	3A-some REAL.3A-die-RECIP-PST=TRM REAL.3M-REDUP-do-PST and.then MASC.rain.XTD NEUT.wind REAL.NEUT-stop-USP	‘(but) some died. until the rain and wind’	Chasm Island (A3368a Side1), 00:03:11.880-00:03:17.458	past	narrative
rama-jungwa	get.up	achievement	ATM	n	y	PFV	x	tm	x	c	Narr	past	PstMod + SoE-PST DiscCon-PST	yarrungkwa V-1-PST V0-PST akwa V1-∅ akwa V2-PST		yarrungkwa n-aka nenəngkwarba nə-lhəke-na akwa na-mak+ajey=ma chair=manja akwa na-rama-jungwa-Ø akwa nu-kwa+bijangu-nə=ma	yesterday 3M-that 3M.man REAL.3M-go-PST and REAL.3M-place+be.upright.PST=MUT chair=LOC and REAL.3M-get.up-REFL-USP and REAL.3M-jump-PST=MUT	‘Yesterday the man went and sat in the chair, and then got up and jumped’	CW, JRB1-032-01, 00.33.22	past	elicitation (video stimuli)
warde	hit; kill	achievement	ATM	b	n	PFV	x	x	x	x	Narr	past	SoE parataxis?	V1-∅		n-akəna nenəngkwarba nenu-warda-Ø, nenu-warda-Ø wurr-aka wurruwarda nenu-warda-Ø wurr-aka wurruwarda	3M-that 3M.man REAL.3M>COLL-hit-USP REAL.3M>COLL-hit-USP COLL-that COLL.dog REAL.3M>COLL-hit-USP COLL-that COLL.dog	‘that man hit the dog’	JL, JRB1-049-01, 00.46.19-00.46.29	past	elicitation (translation task)
warma-jungwa	rise; get.up; fly.away	achievement	ATM	n	y	PFV	x	tt	x	c	Narr	past	SoE DiscCon-PST	V1-∅ akwa V2-PST akwa V3-PST		wurr-akəna wurru-kwulyubena wurruweba nəw-warma-jungwa-Ø ajurungka=lhangwa akwa na-rak-wulyake-na akwa nə-lhawrradhə-na	COLL-that COLL-pretty COLL.parrot REAL.COLL-fly.away-RELF-USP NEUT.ground=ABL and REAL.COLL-round-go.around-PST and REAL.COLL-return-PST	‘The pretty parrot took off from the ground, flew round and round, and then came back’	JL, JRB1-033-01, 00.16.39-00.17.04	past	elicitation (video stimuli)
wurra	throw	achievement	ATM	b	y	PFV	x	x	x	x	Narr	past	SoE parataxis?	V1-∅		malamukwa=wiya numa-wurra-Ø arrawa=lhangwa əmba nara n-ibina nenumamalya	VEG.dugout.canoe=QUANT REAL.3M>VEG-throw.away-USP inside=ABL but NEG 3M-this 3M.person	‘But he only threw out the canoe from underneath, he wasn't there’	JL, A3369b Side1, a4.4 Malamukwa-langwa ‘About canoe accident’	past	narrative
yakwabijə	forget	achievement	ATM	b	n	PFV	x	x	x	x	Argu Epist	past	EpistMod	dhukwa V1-∅		dhukwa ni-yakwabijə-Ø=ma ngalhanga dh-adhə-m-ikirra	maybe REAL.3M-forget-USP=MUT 3F.PRO.POSS 3F-F-INALP-name	‘he probably forgot her name’	anin2_pw_au_004, in van Egmond 2012: 232	past	elicitation (translation task)		epistemic
yedha	arrive	achievement	ATM	b	n	PFV	x	x	d	cons	Narr	past	SoE AspMod	V1-∅ wərənjabə=wiya ('after a quick time')		ni-yedha-Ø yakwuju wərənjabə=wiya	REAL.3M-arrive-USP there quickly=QUANT	‘He got there quick’	JL, JRB1-082-02, 00:16:21.559-00:16:26.409	past	elicitation (translation task)
yengbə	talk, say	achievement	ATM	dna	y	PFV	x	t	x	c	Narr	past	PST-SoE DiscCon	V-1-IRR.PST akena V0-∅ akwa V1-∅	Avertive; 'was going/about to leave' might be closer to the mark	nganyangwa nabə-rraka kənə-lhəka-rni=yedha akena enlhangwa nenmamalya n-angkarr-Ø angaluba dirak=uma akwa ni-yama-Ø ni-yengba-Ø nenu-maka-Ø nungkuwa Ø-ambilya nara a-lhəka-ma	1.PRO.POSS 3M.son-1.KIN IRR.3M-go-PST=PURP but 3M.PRO.POSS 3M.person REAL.3M-run-USP from.over.there VEG.car=INST and REAL.3M-speak-USP REAL.3M-talk-USP REAL.3M>3M-say-USP 2.PRO DEON.2-stay.NPST NEG NEG.NPST-go-NEG.NPST	‘My son nearly left, however a man came from over there in a car and told him “stay, don’t go”’	JL, JRB1-075-01, 00:10:40.510-00:11:02.885	past	elicitation (translation task)
yerraka-ja	make.ashamed; tell.off	achievement	ATM	b	y	PFV	x	t	x	co	BackFore	past	Overlap-PST SoE DiscCon	V1-0-PST biya V1-∅		wurr-akəna wurr-ambilyuma wurri-yukwuja-kiya na-bey-nu-ma biya neba-rrəngba neni-yerraka-ja-Ø=ma	COLL-that COLL-two COLL-small-two REAL.3A-argue-PST=MUT and.then 3M.uncle-3A.KIN REAL.3M>3A-ashamed-CAUS-USP=MUT	‘The two kids were quarrelling, and then their uncle told them off’	JL, JRB1-034-01, 00.05.36-00.06.00	past	elicitation (translation task)
ngkə+lharrə	fall	achievement	ATM	n	y	PFV	x	t	x	c	BackFore	past	Overlap-PST SoE DiscCon	V0-PST akwa V1-∅	clause chaining	n-akəna nenəngkwarba nə-majuwa-rnə-ma akwa ni-ngkə+lharra-Ø karrawara amamərarra=manja ayika	3M-that 3M.man REAL.3M-walk-PST-MUT and REAL.3M -?+fall-USP above NEUT.branch=LOC NEUT.tree	‘The man was walking along, and he fell on the tree branch’	JL, JRB1-033-01, 00.02.11-00.02.28	past	elicitation (translation task)
akburranga	find; reach	achievement	ATM GROUP	b	n	PFV	x	t	l	lli	Narr	past	XTD-PST AspMod < SoE	V0-PST:::=wa V1-∅		na-lhəke-nə-ma=ka wurr-akənu:::=wa, yandha+lhangwa narr-akburranga-Ø ebina angalya Kenina	REAL.3A-go-PST=MUT=EMPH 3A-that.XTD=PL until REAL.3A-reach-USP NEUT.this NEUT.place place.name	‘They went on and on, until they reached Canaan’	Bible Society in Australia 1992: 187	past	narrative (text translation)
akburranga	find; reach	achievement	ATM GROUP	b	y	PFV	x	x	x	c	Narr	past	SoE DiscCon	biya V1-∅		biya Nabali=lhangwa=manja angalya nen-akburranga-Ø	and.then Nabali=POSS=LOC NEUT.place REAL.3A>3M-find-USP	‘Then at Nabali's place they all found him’	Akingambaja-langwa [=About Washing Ceremony], A3370a SIDE1 a5.3	past	narrative
akuma	put	achievement	ATM GROUP	b	n	PFV	x	x	x	c	Narr	past	DisCon SoE DiscCon	ngarningka V0-PST biya V1-∅	non-atomic because of 5	ngarningka nə-lbu-lburra-nga ngəwa biya, amangbalha n-akuma-Ø	again REAL.3M-REDUP-split-PST continue and.then NEUT.five REAL.3M>NEUT-put-USP	Again he (chopped down a tree and) split it and made another five (spear shafts)	AA, A3369a Side2, a3.11 Yingarna-langwa ‘Story about a snake’	past	narrative
anga	bite	achievement	ATM GROUP	dna	y	PFV	x	x	x	cons	BackFore / Explanation	past	Matrix-PR >> V-∅=ABL (= because)	V0-NPST >> V1-∅=ABL		na-rrangkuwangə-na=ma ayarrka dhəmərrmara ng-anga-Ø=mərrə=lhangwa	REAL.NEUT-swell-NPST=MUT NEUT.hand FEM.sandfly REAL.FEM>1-bite-PST=DEP=ABL	‘My hand is swelling up because the sandflies bit me’	Stokes n.d.-b: 117	past	elicitation (translation task)
angmadhə	steal	achievement	ATM GROUP	dna	y	PFV	x	t	x	x	Narr	past	Matrix-PST >> ObjCl-∅	V0-PST >> V1-∅		nara ka-rrəngka-Ø wurr-enjarrngalyilya nuw-angmadhə-Ø=mərrə=mərra nganyangwa diraka	NEG IRR.1>3A-see-PST 3A-boy REAL.3A>NEUT-steal-USP=DEP=PROP 1.PRO.POSS NEUT.car	‘I didn’t see the boys who stole my car’	Stokes n.d.-b: 97	past	elicitation (translation task)
jerrədhə	get finished; become finished; be finished	achievement	ATM GROUP	b	y	PFV	x	t	x	cclit	Narr	past	TempSub << Matrix SoE-PST DiscCon PST	yarrungkwa V1-Ø=lhangwa V2-PST akwa V3-PST		yarrungkwa na-jerrədhə-Ø=ma school=a up at the school, yah na-jerrədhə-Ø=ma s- na-jarrə-Ø=mə=lh- na-jerrədhə-Ø=mə=lhangwa school-a wurr-a wurri-yukwujiya na-malyangke-nə=ma akwa nə-lhəwrradhə-na	yesterday REAL.3A-be.finished-USP=MUT NEUT.school=PF REAL.3A- be.finished-USP=MUT REAL.3A- be.finished-USP=MUT=ABL REAL.3A- be.finished-USP=MUT=ABL NEUT.school-a 3A-this 3A-small REAL.3A-play-PST=MUT and REAL.3A-return-PST	‘Yesterday after they finished at school, the kids played and then went home’	JL, JRB1-033-01, 00.28.42-00.29.09	past	elicitation (video stimuli)
njurrkwa-ja	move	activity bounded/inchoative activity	ATM or ACTIVITY BD	n	y	PFV	x	t	x	c	Narr	past	SoE-PST DiscCon	V0-PST akwa V1-Ø		n-aka nenəngkwarba ni-jəra-ng=ma akwa ni-njurrkwa-ja-Ø=m akən fridge=a	3M-this 3M.man REAL.3M>NEUT-push-PST=MUT and REAL.3M>NEUT-move-CAUS=USP=MUT NEUT.that NEUT.fridge=PF	‘The man pushed and moved the fridge’	ST, JRB1-038-01, 00:07:50-00:07:58	past	elicitation (video stimuli)	REAL-push-PST=MUT + akwa + REAL-move-CAUS=USP=MUT
njurrkwa-ja	move	activity bounded/inchoative activity	ATM or ACTIVITY BD	n	y	PFV	x	tm	x	c	Narr	past	PstMod + SoE-PST DiscCon	yarrungkwa V0-PST akwa V1-Ø		n-akəna nanəngkwarba yarrungkwa ni-jara-ngu=ma akwa ni-njurrkwa-ja-Ø=ma akən fridge	3M-that 3M.man yesterday REAL.3M>NEUT-push-PST=MUT and REAL.3M>NEUT-move-CAUS=USP=MUT NEUT.that NEUT.fridge	‘Yesterday the man pushed and moved the fridge’	ST, JRB1-038-01, 00:08:17-00:08:27	past	elicitation (video stimuli)	REAL-push-PST=MUT + akwa + REAL-move-CAUS=USP=MUT
njurrkwa-ja	move	activity bounded/inchoative activity	ATM or ACTIVITY BD	n	y	PFV	x	t	x	c	Narr	past	SoE-PST DiscCon	V0-PST akwa V1-Ø		n-akəna nenəngkwarba ni-jura-ngu=ma akwa ni-njurrkwa-ja-Ø=ma akəna fridge=a	3M-that 3M.man REAL.3M>NEUT-push-PST=MUT and REAL.3M>NEUT-move-CAUS=USP=MUT NEUT.that NEUT.fridge=PF	‘The man pushed and moved the fridge’	JL, JRB1-038-01, 00:09:07-00:09:17	past	elicitation (video stimuli)	REAL-push-PST=MUT + akwa + REAL-move-CAUS=USP=MUT
njurrkwa-ja	move	activity bounded/inchoative activity	ATM or ACTIVITY BD	n	y	PFV	x	tm	x	c	Narr	past	PstMod + SoE-PST DiscCon	arakbəwiya V0-PST akwa V1-Ø		arakbəwiya n-akəna nenəngkwarba ni-jura-ngu=ma akwa ni-njurrkwa-ja-Ø=ma akəna fridge	long.ago 3M-that 3M.man REAL.3M>NEUT-push-PST=MUT and REAL.3M>NEUT-move-CAUS=USP=MUT NEUT.that NEUT.fridge	‘Long time ago the man pushed and moved the fridge’	JL, JRB1-038-01, 00:09:22-00:09:32	past	elicitation (video stimuli)	REAL-push-PST=MUT + akwa + REAL-move-CAUS=USP=MUT
njurrkwa-ja	move	activity bounded/inchoative activity	ATM or ACTIVITY BD	n	y	PFV-Weak	x	t	x	c	Narr	past	SoE-PST DiscCon	V0-PST akwa V1-Ø		n-akəna nenəngkwarba ni-jura-ngu=ma akwa nu-njurr-kwa-ja-Ø=ma akəna- akəna fridge=a akena nara=dha	3M-that 3M.man REAL.3M>NEUT-push-PST=MUT and REAL.3M>NEUT-move-CAUS=USP=MUT NEUT.that- NEUT.that NEUT.fridge=PF but NEG=TRM	‘The man pushed and [tried to] move the fridge, but nothing’	JL, JRB1-038-01, 00:12:39-00:13:00	past	elicitation (video stimuli)	REAL-push-PST=MUT + akwa + REAL-move-CAUS=USP=MUT	frustrative
njurrkwa-ja	move	activity bounded/inchoative activity	ATM or ACTIVITY BD	n	y	PFV	x	tm	x	c	Narr	past	SoE DiscCon-PST + PstMod	adhuwaba V1-∅ akwa V2-PST		adhuwaba n-aka nanəngkwarba ni-njurrkwa-ja-Ø=ma akwa ni-jəra-ng=m akən fridge	today 3M-that 3M.man REAL.3M>NEUT-move-CAUS-USP=MUT and REAL.3M>NEUT-push-PST=MUT NEUT.that NEUT.fridge	‘Today the man moved and pushed the fridge’	ST, JRB1-038-01, 00:08:35-00:08:42	past	elicitation (video stimuli)	REAL-move-CAUS=USP=MUT + akwa + REAL-push-PST=MUT
njurrkwa-ja	move	bounded iterated activity	ATM or ACTIVITY BD	n	y	PFV-Weak	x	tm	i	p	Narr	past	PstMod + SoE-PST DiscCon + RED.echo	V-1-PST V0-PST akwa V1-Ø	PC - weak perfective	yarrungkwa n-akəna nenəngkwarba nu- ni-jura-ngu=ma- ni-jura-ngu=ma akən fridge=a akwa nə-njurrukwa-ja-Ø=ma ekena nara engkəbarrungwarrungwa akəna	yesterday 3M-that 3M.man REAL.3M>NEUT-push-PST=MUT REAL.3M>NEUT-push-PST=MUT NEUT.that NEUT.fridge=PF and REAL.3M>NEUT-move-CAUS=USP=MUT but NEG NEUT.heavy NEUT.that	‘Yesterday the man pushed the fridge and [tried to] move [it], but nothing, it was too heavy’	JL, JRB1-038-01, 00:13:47-00:14:06	past	elicitation (video stimuli)	REAL-push-PST=MUT + akwa + REAL-move-CAUS=USP=MUT	frustrative
yedha	arrive	achievement	ATM PREP	b	y/n	PFV	x	t	x	cc	Narr	past	DiscCon SoE DiscCon-PST	biya V1-∅ arakba (then) V2-PST		biya ni-yadha-Ø nungw-enikba akwa yakwujina arakba nuw-ambilya adhalyuma=manja wurr-akəna=dha	and.then REAL.3M-arrive-USP 3M.father-KIN.3M and there COMPL.ACT REAL.3A-stay.PST NEUT.river=LOC 3A-that=TRM	‘And then his father arrived and they all stayed there at the river’	Kwurrirda Kwurrirda-langwa, A3369a Side1 a3.3	past	narrative
ngaja	hunt (down)	achievement	ATM PREP	b	y	PFV	x	t	x	c	Narr	past	SoE DiscCon-PST	V1-∅ akwa V2-PST V3-PST		n-aka nenəngkwarba nə-ngaja-Ø=ma yiburadha akwa ni-lhəka-rna angaly=uwa nə-dhaka-Ø=ma	3m-this 3M.man REAL.3M-hunt-USP=MUT MASC.wallaby and REAL.3M-go-PST NEUT.place=ALL REAL.3M>MASC-cook-PST=MUT	‘The man hunted the wallaby, went home, and cooked it’	JL, JRB1-034-01, 00.07.21-00.07.35	past	elicitation (translation task)
walka	sneak.up	achievement	ATM PREP	b	y	PFV	x	m	x	x	Narr	past	PstMod	arakba=wiya V1-∅		arakba=wiya yukwujə=wiya ngayuwa ngayuwa ngenu-walka-Ø-ma nganyangwa nganamjamjerrka	COMPL.ACT=QUANT little=QUANT 1.PRO 1.PRO REAL.1>3M-sneak-USP=MUT 1.PRO.POSS 3M.grandfather	‘Long time ago the child snuck up on my grandad’	CW, JRB1-001-01, 00.34.39-00.34.51	past	elicitation (translation task)
yedha	arrive	achievement	ATM PREP	b	y	PFV	x	t	x	x	Narr	past	PstMod	yarrungkwa V1-Ø		yarrungkwa n-akəna nenəngkwarba ni-yadhə-Ø=ma	yesterday 3M-that 3M.man REAL.3M-arrive-USP=MUT	‘He arrived yesterday’	JL, JRB1-018-01, 00.02.59-00.03.08	past	elicitation (translation task)
yedha	arrive	achievement	ATM PREP	b	y	PFV	x	x	x	x	Narr	past	∅	V1-Ø		n-akən nenəngkwarba ni-yadhə-Ø=ma Numbulwaru=manja	3M-that 3M.man REAL.3M-arrive-USP=MUT place.name=LOC	‘He arrived at Numbulwar’	JL, JRB1-018-01, 00.03.32-00.03.36	past	elicitation (translation task)
engkərrka	think; listen	activity	CUM	n	y	IMPFV	x	t	x	c	Backgr	past	SoE-PST DiscCon	V0-PST akwa V1-∅		n-akən James=a n-ardi-nga-ma n-abən nenəngkwarba akwa n-engkərrka-Ø	3M-that James=PF REAL.3M-call.out-PST=MUT 3M-that 3M.man and REAL.3M-listen-USP	‘James called out to that boy, and he listened’	ST, JRB1-054-01, 00.22.57-00.23.06	past	elicitation (translation task)
ngemba	bathe	activity	CUM	n	y	PFV?	x	m	x	x	Narr?	past	PstMod	adhuwaba V1-∅		adhuwaba n-akəna nenəngkwarba nə-ngemba-Ø mijiyely=manja	today 3M-that 3M.man REAL.3M-bathe-USP VEG.beach=LOC	‘that man, he swam at the beach’	JL, JRB1-050-01, 00.06.52-00.07.02	past	elicitation (flash card stimuli)
ngurrkwa	hunt	activity	CUM	n	y	IMPFV	x	x	h	x	Narr? Backgr?	past	∅? Hab?	V1-Ø	Impossible to judge out of context	nu-ngurrkwa-Ø=m yimendhə=wa	REAL.3M-hunt-USP=MUT MASC.turtle=ALL	‘He hunted turtles’	CW, JRB1-001-01, 00.04.56-00.04.58	past	elicitation (translation task)
angkarrə	run	activity bounded	CUM BD	dna	n	PFV	x	t	x	p	Narr	past	SoE-PST parataxis	V1-Ø V2-PST akwa V3-PST		y-aka yirrburrbula n-angkarra-Ø m-əkəna [nu?]ma-jama-Ø akəna wall=a akwa [nə?]-nguwanjə-n=dha	MASC-this MASC.ball REAL.MASC-roll-USP VEG-that REAL.VEG-do-PST NEUT.that NEUT.wall= PF and REAL.NEUT(?)-stop-PST=TRM	‘The ball rolled hit the wall and stopped’	ST, JRB1-034-01, 00.16.53-00.17.00	past	elicitation (translation task)
angkarrə	run	activity bounded	CUM BD	dna	y	PFV	x	t	x	c	Narr	past	SoE DiscCon-PST	akwa V1-∅ arakba V2-PST n-ərribərriba		akwa n-angkarra-Ø arakba nu-wurda-nga angwarnda=manja abalkaya=dha	and REAL.3M-run-USP COMPL.ACT REAL.3M-climb-PST NEUT.stone=LOC above=TRM	‘And he ran off (and) climbed high on the rocks’	Chasm Island, A3368a Side1, 00:01:38.930-00:01:43.290	past	narrative
ngərraja	argue.about	activity bounded	CUM MAX	n	y	PFV	x	t	d	p	Narr	past	AspMod.DiscCon-PST SoE	adhənuba=wiya ('after a short time') V0-PST V1-∅ V2(=V1)-∅	Re-iteration/reformulaiton of PST V	adhənuba=wiya wurrəng-alhəkina Wakaba akwa Dangmiyala narrəngi-be-yi-na narra-lhərrakə-ngərraja-Ø, nenənga-ngərraja-Ø Stella n-akəna=lhangwa Nenungwanjirrumiya=lhangwa dhadhingiy-enikba	soon=QUANT 3F.DU-those.two Wakaba and Dangmiyala REAL.3F.DU-argue-RECIP-PST REAL.3F.DU>3A-internal.organs(?)-argue.about-USP REAL.3F.DU>3A-argue.about-USP Stella 3M-that=POSS Nenungwanjirrumiya=POSS 3F.wife-3M.KIN	‘At first Wakaba and Dangmiyala had an argument, they both argued over them two, they argued over Stella the wife of Nenungwanjirrumiya’	Akingambaja-langwa [=About Washing Ceremony], A3370a SIDE1 a5.3	past	narrative
mebi	sing	activity bounded	CUM MAX	dna	y	PFV	x	x	x	x	Narr?	past	∅?	V1-∅	Translation suggests a transitive reading. Rather more like a bounded activity?	n-akəna nenəngkwarba nə-mebu-Ø=ma	3M-that 3M.man REAL.3M-sing-USP=MUT	‘he sang a song’	JL, JRB1-049-01, 00.25.23-00.25.50	past	elicitation (translation task)			JL: ‘he sang a song, nəmebuma, nəmebuma, it's singing. Yeah, that man is singing, yeah nakəna nenəngkwarba nəmebuma, he was singing, yeah, he [is] singing, like he's singing now, nakəna nenəngkwarba nəmebuma’; JL doesn’t like this form as much as others such as nəmebinəma
mebi	sing	activity bounded	CUM MAX	dna	y	PFV	x	x	x	x	Narr?	past	∅?	V1-∅ + Obj		arnkawura n-akəna nenəngkwarba nə-mebu-Ø=ma emeba	one.day 3M-that 3M.man REAL.3M-sing-USP=MUT NEUT.song	‘he sang a song’	JL, JRB1-049-01, 00.27.36-00.28.02	past	elicitation (translation task)			JL: ‘like to me, I heard that man, he was singing, so arnkawura nakəna nenəngkwarba nəmebuma emeba, nəmebuma, he was like sing- he [is] singing, I heard him singing, so nəmebuma, yeah, numebuma, I heard him singing, he was s- I heard him singing a song, so nəmebuma’
angkarrə	run	activity max	CUM MAX	b	y	PFV	x	x	dil	lli	Narr	past	XTD-SoE AspMod	V1-∅:::=wa V2-∅		yingi-rukwulyaka-Ø ying-angkarru-Ø:::=wa, ying-arjiyi-nga akuwabijina awurukwa	REAL.3F-go.around-PST REAL.3F-fly-Ø.XTD=PL REAL.3F-stand-CofS beside NEUT.billabong	‘She flew down and circled round and round (until) she was standing at the edge of the billabong’	GL, A3369a Side1, a3.7 Nimimba-langwa akwa nenikuwenikba-langwa ‘The blind man’	past	narrative
ngərraja	argue.about	activity max	CUM MAX	b	y	PFV	x	tm	d	p	Narr	past	AspMod.DiscCon-IRR.PST SoE parataxis (> DiscCon)	adhənuba ('soon') V-2-IRR-PST(AVERT) V-1-IRR-PST V0-PST V1-∅ V2-PST V3-PST	ongoing argument presented as at once averted and ongoing => unfinished argument?	yakwujine=ka adhənuba ka-wardi-yi-nə=ma wurr-akəna akəna karri-ngirra-ju-wa=ma, narri-ngərrajə-Ø=ma dhambula akəna narr-arriyaka-Ø=ma akəna ne-yama-Ø wurru-wurr-akuwarra ka-wardi-yi-nə=me=ka adhənuba akəna yanda ngawa narra-yangki-yangk-arringa-rna	there=EMPH soon IRR.3A-hit-RECIP-PST=MUT COLL-that NEUT.that IRR.3A-argue.about-CAUS-PST=MUT REAL.3A-argue.about-USP=MUT FEM.feather.string NEUT.that REAL.3A-make.mistake-PST=MUT NEUT.that REAL.3A-say-PST 3A-REDUP-half IRR.3A-hit-RECIP-PST=MUT=EMPH soon NEUT.that only CONT.ACT REAL.3A-REDUP-voice-break-PST	‘Soon they were just about to fight over the feather string, they were arguing over it, they all said some made a mistake and half of the people nearly had a fight but some of the people had stopped them’	Akingambaja-langwa [=About Washing Ceremony], A3370a SIDE1 a5.3	past	narrative
wara	refuse.to	neg.state	CUM STATE	dna	?	IMPFV	x	t	x	p	BackFore (Explanation) + V-PST	past	Overlap-PST SoE parataxis	V1-∅ V2-PST		yingu-wara-Ø raja, nanga-kwa-Ø anhənga angakəna-mərriya yilyakwa, yimumarnda ying-ayiji-na nenga-beka-ju-wa cup=mərra tea yingu-bekə-na, neni-yemin-jema-Ø nen-amb-ambilyu:::=wa, nenu-mungkwula	REAL.3F-refuse.to-USP NEUT.rice REAL.3M>3F-give-PST NEUT.food whats.it.called-the.rest MASC.sugarbag MASC.freshwater.turtle REAL.3F-stand-PST REAL.3M>3F-drink-CAUS-PST NEUT.cup=INST NEUT.tea REAL.3F-drink-PST REAL.3M.DU-REDUP-do-PST REAL.3M.DU-REDUP-stay.PST.XTD=PL REAL.3M.DU-sleep.PST	‘She didn’t want it [the rice] and so he gave her the food and the sugarbag and water turtles and she ate it and gave her a cup of tea and she drank the tea. They both kept on staying there and both went to sleep’	BB, A3370a Side1, a5.8 Diyaburaka-langwa	past	narrative
aburiya	be.stuck	state	CUM STATE	n	n	IMPFV	x	x	x	c	Backgr	past	DiscCon TempShift	arakba V1-∅		arakba wurri-rn-dhirnd-arrngwa iya wurr-akəna wurru-ngwu-ngw-arrngwa na-wurrak-aburiya-Ø arakba arrawu=wa	COMPL.ACT 3A.REDUP(?)-mother-3A.KIN and 3A-that 3A-REDUP(?)-father-3A.KIN REAL.3A-many-be.stuck-USP COMPL.ACT underneath=ALL	‘their mothers and fathers were stuck in the ground’	JL, A3369b Side1, a4.2 Jigagwa-langwa-langwa daburradikba akwulyangburarrka ‘Her daughter’s dream’	past	narrative
abuwalya	be.hungry.for.meat	state	CUM STATE	b/open scale	n	IMPFV	x	t	x	c	Explanation	past	Matrix-PST >> DiscCon CausSub Backgr	biya NOM-EVT arakba, V0-PST V1-Ø=baba ('because V1')		biya nenə-mərnda-kə-lhalhəka wurradhədiyuwangkwa arakba, nə-lhəke-na nə-lhəbi-nə=dha n-abuwalya-Ø=baba=dha	and.then REAL.3M>3A-many-NSR-leave 3A.old.women COMPL.ACT 3M-go-PST REAL.3M-hunt-PST=TRM REAL.3M-hungry.for.meat-USP=REAS=TRM	‘Then he left the old ladies and he went hunting because he was hungry for meat’	Dingarna-langwa akwa wurruwarda-langwa, A3369a Side1 a3.5	past	narrative
alyadhə	hang	state	CUM STATE	n	n?	IMPFV	x	m	x	x	Backgr	past	PstMod	V1-Ø		n-alyadhə-Ø=ma	REAL.3M-hang-USP=MUT	‘he hung’ (in response to prompt ‘so if we say yarrungkwa nakəna nenəngkwarba...’)	JL, JRB1-022-01, 00:04:18-00:04:20	past	elicitation (video stimuli)
jelalu	hang; hang.out; hang.down	state	CUM STATE	n	n	IMPFV	x	t	x	x	Backgr	past	Rel -PST	Rel:V0-PST V1-∅	akwa V1-∅	akəne=ka dhambula yirr-andheyu=ma nena-ka-rarika-Ø=me=ka memurruma=lhangwa akwa angerriba nenumamalyu=wa na-murndaka-jelalu-Ø=ma	NEUT.that=EMPH NEUT.feather.string REAL.1A-look.for.PST=MUT REAL.3M.DU(?)>NEUT-NSR-tie.up-PST=MUT=EMPH VEG.back.of.neck=ABL and to.there 3M.people=ALL REAL.COLL-many-hang.out-USP=MUT	‘That feather string that we saw had been all tied around from his neck and down to his body, they were all hanging down’	Akingambaja-langwa [=About Washing Ceremony], A3370a SIDE1 a5.3	past	narrative
ngiyendha	want	state	CUM STATE	dna	y	IMPFV	x	t	x	x	Backgr	past	Matrix-∅ >> ObjSub Pst IRR	V1-∅ V2-∅=PURP (wanted to V2)	past irrealis	ngaya ngi-yendha-Ø=ma k-angkarrə-Ø=m=yedhə yedhəkən yedhəkba=lhangwiya	1.PRO REAL.1-want-USP=MUT IRR.1-run-USP=MUT=PURP from.there Emerald.River=PERL	‘I wanted to run along Emerald River’	JL, JRB1-044-01, 00:07:21-00:07:25	past	elicitation (translation task)
ngiyendha	want	state	CUM STATE	dna	y	IMPFV	x	t	x	x	Backgr	past	Matrix-∅ >> ObjSub Pst IRR	V1-∅ V2-IRR-∅ (wanted to V2)	past irrealis	n-akəna n-eni-ngendha-Ø-m n-akəna n-enukw-enukba n-enu ku-radha-Ø dh-akəna ayika	3M-that REAL.3M.S-3M.O-want-USP=MUT 3M-that 3M-son-3M.KIN 3M-this IRR.3M-chop-USP 3F-that NEUT.tree	‘He wanted his son to chop down the tree’	JL, JRB1-044-01, 00:34:42-00:34:48	past	elicitation (translation task)
radha	chop	state	CUM STATE	dna	y	IMPFV	x	t	x	x	Backgr	past	Matrix-∅ >> ObjSub Pst IRR	V1-∅ V2-IRR-∅ (wanted to V2)	should not be in the sample - past irr utterance, not a past indicative	n-akəna n-eni-ngendha-Ø-m n-akəna n-enukw-enukba n-enu ku-radha-Ø dh-akəna ayika	3M-that REAL.3M.S-3M.O-want-USP=MUT 3M-that 3M-son-3M.KIN 3M-this IRR.3M-chop-USP 3F-that NEUT.tree	‘He wanted his son to chop down the tree’	JL, JRB1-044-01, 00:34:42-00:34:48	past	elicitation (translation task)
angburadha	get.tired.of(something); become.tired.of(something)	CofS	INCH ATM	b	n	PFV	x	t	x	cc	Narr	past	DiscCon SoE DiscCon-PST	arakba V1-Ø akwa V2-PST V3-Ø ('went V3')		ngalh-aje=ka arakba ying-angburadha-Ø dhərndh-enikba akwa yingə-mungkulha yingə-mungkulhi-nga	3F.PRO-CofR=EMPH COMPL.ACT REAL.3F-get.tired-USP 3F.mother-KIN.3M and REAL.3F-sleep.PST REAL.3F-sleep-CofS	‘His mother got tired of him and went to sleep’	Kwurrirda Kwurrirda-langwa, A3369a Side1 a3.3	past	narrative
enibu-dhə	be.alive; become.alive	CofS	INCH ATM	b	n	PFV	x	x	x	x	Narr	past	SoE parataxis?	V1-∅		n-eniba-dhə-Ø=ma	REAL.3M-alive-INCH-USP=MUT	‘He came back to life’	JL, JRB1-077-01, 00:44:54.310-00:44:57.730	past	elicitation (translation task)
lharrumur-dha	become.dark	CofS	INCH ATM	b	n	PFV	x	m	d	cons	Narr	past	PstMod+AspMod	wurdarriya+wiya ('until morning') V1-∅	possibly lexified INCH?	na-lharrumurdha-Ø nenə-mungkwulha wurdarriya+wiya	REAL.NEUT-dark-PST REAL.3M.DU-sleep.PST morning+QUANT	‘It became dark and they slept until morning’	Bible Society in Australia 1992: 502	past	narrative (text translation)
lharruwura-dha	be.late.afternoon; become.late.afternoon	CofS	INCH ATM	b	n	PFV	x	x	x	c	Narr	past	SoE DiscCon	biya V1-∅	non ambiguous because of biya	biya na-lharruwura-dha-Ø arakba	and.then REAL.NEUT-afternoon-INCH-USP COMPL.ACT	‘It was late afternoon’ [i.e. it had already become late afternoon]	Bible Society in Australia 1992: 174	past	narrative (text translation)
lharruwura-dha	be.late.afternoon; become.late.afternoon	CofS	INCH ATM	b	n	PFV	x	x	x	c	Narr	past	DiscCon SoE	kembirra V1-∅		kembirra na-lharruwura-dha-Ø arakba	then REAL.NEUT-afternoon-INCH-USP COMPL.ACT	‘Afternoon came’ [and then the sun began to set]	Bible Society in Australia 1992: 624	past	narrative (text translation)
wangkwa-dhə	become.old	CofS	INCH ATM	b	n	PFV	x	x	x	x	Narr	past	SoE parataxis?	V1-∅		n-eni-wangkwa-dhə-Ø=ma	REAL.3M-M-man-INCH-USP=MUT	‘He became an old man’ [speaker translation]	JL, JRB1-077-02, 00:03:31.138-00:03:34.828	past	elicitation (translation task)
yakwurra	be.thirsty; get.thirsty	CofS	INCH ATM	b	n	PFV	x	m	x	x	Narr	past	PstMod	V1-∅ alyarrəngwalyilya ('that night')		ni-yakwurra-Ø n-akəna akungwa alyarrəngwalyilya	REAL.3M-be.thirsty-USP 3M-that NEUT.water NEUT.night	‘He got thirsty [for water] during the night’	Stokes n.d.-b: 26	past	elicitation (translation task)
rriya-dha	be.sulky; get.sulky	CofS	INCH ATM	b	n	PFV	x	x	x	c	Narr	past	SoE DiscCon	biya V1-∅	Fore on previous V ; not clear if subject starts sulking then or not	biya enamba=lhangwa Arrama ni-lyangi-rriya-dha-Ø	and.then 3M.PRO.SEQ=POSS Arrama REAL.3M-head-bad-INCH-USP	‘Then it was Arrama's turn, he was sulky’	Akingambaja-langwa [=About Washing Ceremony], A3370a SIDE1 a5.3	past	narrative
walyuwu	be.cooked; get.cooked; be.ripe; get.ripe	CofS/state	INCH ATM	closed max	n	PFV	x	x	x	c	Narr	past	DiscCon+XTD SoE	bi:::ya V1-∅		bi:::ya nu-walyuwu-Ø-manji=kba=dha, y-akina yimarndakuwaba y-inumalye=ka=dangba	and.then.TXD REAL.3M-be.cooked-USP=LOC=DENIZ=TRM MASC-that MASC.blue.tonged.lizard MASC-good?=EMPH=EMPH	‘When at last that blue-tongued lizard was cooked to perfection, it was the fattiest, juiciest blue-tongued lizard that ever was’	Kwurrirda Kwurrirda-langwa, A3369a Side1 a3.3	past	narrative
angkarrə	run	inchoative activity = achievement	INCH ATM	dna	y	PFV	x	t	x	c	BackFore	past	PstMod + Overlap-PST SoE DiscCon	yarrungkwa V-2-PST V-1-PST V0-PST biya V1-∅	Fore on 'run'	yarrungkwa n-akən ni-yukwujiya na-rrak-ajey=m akwa nəm-arr-abərrəngka-Ø=ma m-arrakwəyabe-nə=ma maməwura biya wurr-akən wurruwarda nəw-angkarrə-Ø=m enəwa=wa	yesterday 3M-that 3M-small REAL.3M-forehead-stand.PST=MUT and REAL.3M>VEG-REDUP-look-PST=MUT REAL.VEG?-rise-PST=MUT VEG.sun and.then COLL-that COLL.dog REAL.COLL-run-USP=MUT 3M.PRO=ALL	‘Yesterday the boy was sitting and watching the sun rise, and then the dog ran up to him’	ST, JRB1-034-01, 00.04.17-00.04.27	past	elicitation (translation task)
angkarrə	run	inchoative activity = achievement	INCH ATM	dna	y	PFV	x	t	x	c	BackFore	past	Overlap-PST SoE DiscCon	V0-PST akena V1-Ø	Back on 1st V	nu-ngurrkwa-rnə=ma yiburadh=uwa akena n-angkarra-Ø	REAL.3M>MASC-hunt-PST=MUT MASC.wallaby=ALL but REAL.MASC-run-USP	‘[The man] was hunting the wallaby, but it ran away’	ST, JRB1-034-01, 00.06.53-00.07.01	past	elicitation (translation task)
angkarrə	run	inchoative activity = achievement	INCH ATM	b	y	PFV	x	x	x	p	Narr	past	SoE-RED parataxis	V0-RED-∅ V1-∅		na-lhawu-lhawurradh-Ø, nuw-angkarra-Ø	REAL.NEUT-REDUP-return-USP REAL.NEUT-run-USP	‘It [the mother cat] kept going back, it ran off’	GL, A3369a Side 1 a3.4, Bujikeda ‘Mother cat’, 00.07.28-00.07.32	past	narrative
engkərrka	think; listen	inchoative activity = achievement	INCH ATM	n	y	PFV	x	t	x	c	Narr	past	SoE-PST DiscCon	V0-PST akwa V1-∅		ngayuwa ng-arda-ngu-ma James=wa akwa n-engkərrka-Ø	1.PRO REAL.1-call.out-PST=MUT James=ALL akwa REAL.3M-listen-USP	‘I called out to James, and he listened’	ST, JRB1-054-01, 00.23.45-00.24.05	past	elicitation (translation task)			(in response to ‘could we also say nakəna James-a ningkərrka? [enenuwiya]’ where ST replies ‘no, no, if I was calling out to you I'd use that sentence, ngayuwa ngardanguma James-wa akwa nengkərrka’)
lhəka	go	inchoative activity = achievement	INCH ATM	n	y	PFV	x	t>>	x	p	Narr	past	SoE DiscCon >> IRR.PST	V1-Ø V2-CofS-Ø akwa V3-Ø akwa V4-Ø >> V5-IRR-PST	Is V1 V2 a case of SVC?	n-akən nanəngkwarba nə-lhəka-Ø=ma n-ambarr-nga=ma akən-manja chair=a akwa nə-mədhilyakbə-Ø-ma akwa kamba nə-kw-aji-nga=ma kənə-lhəka-nə=ma	3M-that 3M.man REAL.3M-go-USP=MUT REAL.3M-sit-CofS=MUT NEUT.that=LOC chair=PF and REAL.3M-cough-USP=MUT and then REAL.3M-half(?)-be.upright-CofS=MUT IRR.3M-go-PST=MUT	‘he stood up and walked away’	ST, JRB1-037-01, 00:31:11-00:31:21	past	elicitation (video stimuli)
ruk+wulyaka-ja	stir; spin; turn.around	activity	PLUR ACT	n	y	PFV? IMPFV?	x	m	x	x	Narr? Backgr?	past	PstMod	yarrungkwa V1-Ø		yarrungkwa n-akəna ni-yuwkujiya nə-ruk+wulyaka-ja-Ø-ma	yesterday 3M-that 3M.small REAL.3M>NEUT-stir-CAUS-USP=MUT	‘Yesterday the boy turned [the wheel] around’	JL, JRB1-023-01, 00.37.20-00.37.28	past	elicitation (video stimuli)
ruk+wulyaka-ja	stir; spin; turn.around	activity	PLUR ACT	n	y	PFV? IMPFV?	x	m	x	x	Narr? Backgr?	past	PstMod	yarrungkwa V1-Ø		yarrungkwa n-akəna niyukwujiya nəmə-ruk+wulyaka-ja-Ø=ma mijiyanga	yesterday 3M-that 3M.small REAL.3M>VEG-stir-CAUS-USP=MUT VEG.boat	‘Yesterday the boy turned the [wheel of the] boat around’	JL, JRB1-024-01, 00.07.44-00.07.58	past	elicitation (video stimuli)
njurrkwa-ja	move	iterated activity	PLUR ACT	n	y	PFV? IMPFV?	x	tm	di	it	Narr? Backgr?	past	IterationV-PST + PstMod	mamawura ('day') lharrma-PST V1-∅	larrma or lharrma? + Translation	n-akəna nenəngkwarba nəma-larrma-ngu-ma mamawura ni-jara-ngu=ma or ni-njurrkwa-ja-Ø=ma akəna fridge	3M-that 3M.man REAL.3M>VEG-do.all.day- PST=MUT VEG.day REAL.3M>NEUT-push-PST=MUT REAL.3M>NEUT-move-CAUS-USP=MUT NEUT.that NEUT.fridge	‘The man was pushing and moving the fridge all day’	JL, A JRB1-038-01, 00:10:29-00:10:37	past	elicitation (video stimuli)
dhakba-jangu	grind; knock [+REFL]	semelfactive	PLUR ACT	dna	y	PFV?	x	x	i	it	Narr?	past	IterPred	V1-∅ ngəwa ('continue') keep.on		n-aka nanəngkwarba na-dhakba-jangu-Ø=m door=man ngəwa n-ərribərrib=dha	3M-that 3M.man REAL.3M-knock-REFL-USP=MUT NEUT.door=LOC CONT.ACT 3M-keep.on=TRM	‘The man kept on knocking on the door’	ST, JRB1-037-02, 00:18:25-00:18:32	past	elicitation (video stimuli)
dhakba-jangu	grind; knock [+REFL]	semelfactive	PLUR ACT	dna		PFV?	x	x	i	cit	Narr?	past	IterPred + SoE DiscCon	V1-∅ n-ərribərriba (3keep.on) biya V2-∅		n-aka nanəngkwarba n-adhakba-jangu-Ø=ma yerrkam- ayerrka=ma akən=men door=a n-ərribərriba biya n-aka nanəngkwarba n-angkarrə-Ø=m yedhakənaya	3M-that 3M.man REAL.3M-knock-REFL-USP=MUT NEUT.hand=INST NEUT.that=LOC NEUT.door=PF 3M-keep.on and.then 3M-that 3M.man REAL.3M-run-USP=MUT that.way	‘The man kept on knocking with his hand on the door, and then the other man ran past’	ST, JRB1-037-02, 00:19:08-00:19:18	past	elicitation (video stimuli)
dhakba-jangu	grind; knock [+REFL]	semelfactive	PLUR ACT	dna	y	IMPFV	x	tm	x	co	Backgr	past	PstMod SoE DiscCon-PST	adhuwaba V1-∅ biya V2-PST	There is something off in the translation here, given the follow up event in the past. 'adhuwaba' is actually a recent past	n-aka nanəngkwarba adhuwaba nə-dhakba-jang-Ø=m akən=man door=a biya n-akən nu-wilyab nanəngkwarba edhəkəna nə-majuwa-nə=ma	3M-this 3M.man today REAL.3M-knock-REFL-USP=MUT NEUT.that=LOC NEUT.door=PF and.then 3M-that 3M-one 3M.man that.way REAL.3M-walk-PST=MUT	‘Today the man was knocking on the door, and then the other man walked past’	ST, JRB1-037-02, 00:19:27-00:19:35	past	elicitation (video stimuli)
dhakba-jangu	grind; knock [+REFL]	semelfactive	PLUR ACT	dna	y	IMPFV	x	m	hi	cit	Backgr	past	PstMod Iter/HabPred	a:::rakbəwiya n-ərribərriba ('3M-keep.on) V1-∅ biya V2-∅	not LLI?	n-aka nanəngkwarb a:::rakbəwiya n-ərribərriba n-adhakba-ja-Ø=m door=manja biya nanga wurr-akəna warnmamalya ambəlyuma aləlbaj akən=manj angalya n-angkarrə-Ø=m yedhakəna	3M-that 3M.man XTD.long.ago 3M-keep.on REAL.3M-knock-REFL-USP=MUT NEUT.door=LOC and.then ? 3A-that 3A.person NEUT.two ? NEUT.that=LOC NEUT.place REAL.3M-run-USP=MUT that.way	‘A long time ago the man used to keep knocking on the door and then the other man ran that way’	ST, JRB1-037-02, 00:19:55-00:20:07	past	elicitation (video stimuli)
knock-əm-dha	knock	semelfactive	PLUR ACT	dna	y	IMPFV?	x	x	i	c	BackFore + SoE	past	IterMod + Overlap SoE DiscCon	n-ərribərriba ('keep.on') V1-∅ biya V2-∅		n-akən neniyuwangkwa n-ərribərriba nə-knock-əm-dha-Ø-m door-manja biya n-aka nanəngkwarba n-angkarrə-Ø=ma yadhakəna	3M-that 3M.old.man 3M-keep.on REAL.3M>NEUT-knock-TRVSR-BLI-USP=MUT NEUT.door-LOC and.then 3M-that 3m.man REAL.3M-run-USP=MUT that.way	‘The old man kept on knocking on the door, and then the man ran past’	ST, JRB1-037-02, 00:18:49-00:18:57	past	elicitation (video stimuli)
ngwurrukbalija	open(something)	accomplishment	PLUR BD ACC	dna	y	PFV	x	t	i	cit	Narr	past	IterPred SoE DiscCon-PST	n-ərribərriba ('3M.keep.on') V1-∅ akena V2-PST		n-aka nanəngkwarba n-ərribərriba nu-ngwurrubalija-Ø=m akən door=a akena ni-kamadhə-nə=ma	3M-that 3M.man 3M-keep.on REAL.3M>NEUT-open-USP=MUT NEUT.that NEUT.door=PF then REAL.3M-feel.upset-PST-MUT	‘The man kept on opening the fridge and felt sad’	ST, JRB1-037-02, 00:11:48-00:12:02	past	elicitation (video stimuli)
ngwurrukbalija	open(something)	accomplishment	PLUR BD ACC	dna	y	PFV	x	t	ilr	cit	Narr	past	Matrix-PST >> ObjCl-∅ SoE DiscCon-PST	kamb arakba V-1-XTD-PST biya V0-XTD-PST >> V1-∅ akena V2-PST	akena here = but	kamb arakba ni-yen-jama:::-Ø biya n-aka nanungkwarba neni-bəkədha ni-yen-jama-Ø nungurru- ni-ngiyandha-ngu nu-ngurrbalija-Ø-m akən door akena ni-karradhu-nə=ma	then COMPL.ACT REAL.3M-REDUP-do.XTD-PST and.then 3M.that 3M.man 3M-crazy REAL.3M-REDUP-do.XTD-PST REAL.3M-want-PST REAL.3M>NEUT-open-USP=MUT NEUT.that NEUT.door but 3M-unable.to.do(?)-PST=MUT	‘The man kept on trying to open the fridge door, he was a crazy man, but he wasn’t able to’	ST, JRB1-037-02, 00:12:21-00:12:40	past	elicitation (video stimuli)
ngərandha	cut.up	iterated accomplishment	PLUR BD ACC	n	y	PFV	x	tm	x	it	Narr	past	PstMod + IterPred	yarrungkwa V1-∅ n-ərribərriba ('keep on')		n-aka nənəngkwarba yarrungkwa nə-ngərandha-Ø=m akən bread=a n-ərribərriba	3M-that 3M.man yesterday REAL.3M>NEUT-cut.up-USP=MUT NEUT.that NEUT.bread=PF 3M-keep.on	‘Yesterday the man kept on cutting up the bread’	ST, JRB1-038-01, 00:04:17-00:04:25	past	elicitation (video stimuli)
marrakaja	grab; take	iterated achievement	PLUR BD ACC	dna	y	PFV	x	t	di	c	Narr	past	AspMod SoE DiscCon-PST	keep.on ngawa (CONT) V-1-∅ angkəbəbərnama ('all day') ankgwabəbənama V0-PST biya V1-∅ keep.on V2-PST ngewa		dh-akən dhədharrəngka dhə-rribərrib ngəw ying-merrəmaja-Ø=ma-m a-md-akən dhumbala angkəbəbərnama biya n-akən nanəngkwarba ankgwabəbənama nu-wilyaka-Ø=m ayika biya dh akən dhədharra yingi-na-marrakaja-Ø=m dh-ərribərrib a-mdh-akən ayik=dha yengi-yenja-Ø=m ngəwa=dha	3F-that 3F.woman 3F-keep.on CONT.ACT REAL.3F-hang.out-USP=MUT-? NEUT-many-that FEM.clothes all.day and.then 3M-that 3M.man all.day REAL.3M-carry-PST=MUT NEUT.tree and.then 3F-that 3F.woman REAL.3F-3M-grab-USP=MUT 3F-keep.on NEUT-many-that NEUT.tree=TRM 3F-do-PST=MUT CONT.ACT=TRM	‘The woman kept on hanging out the clothes all day, and then the man took the stick and the woman grabbed it’	ST, JRB1-037-02, 00:17:13-00:17:31	past	elicitation (video stimuli)
marerrəmaja	hang.out(something)	iterated accomplishment	PLUR BD ACC?	n	y	PFV	x	t	di	cc	Narr	past	AspMod + SoE DiscCon-PST	dhə-rribərrib ngəw 1-Ø biya V2-PST biya V3-Ø		dh-akən dhədharrəngka dhə-rribərrib ngəw ying-merrəmaja-Ø=ma-m a-md-akən dhumbala angkəbəbərnama biya n-akən nanəngkwarba ankgwabəbənama nu-wilyaka-Ø=m ayika biya dh akən dhədharra yingi-na-marrakaja-Ø=m dh-ərribərrib a-mdh-akən ayik=dha yengi-yenja-Ø=m ngəwa=dha	3F-that 3F.woman 3F-keep.on CONT.ACT REAL.3F-hang.out-USP=MUT-? NEUT-many-that FEM.clothes all.day and.then 3M-that 3M.man all.day REAL.3M-carry-PST=MUT NEUT.tree and.then 3F-that 3F.woman REAL.3F-3M-grab-USP=MUT 3F-keep.on NEUT-many-that NEUT.tree=TRM 3F-do-PST=MUT CONT.ACT=TRM	‘The woman kept on hanging out the clothes all day, and then the man took the stick and the woman grabbed it’	ST, JRB1-037-02, 00:17:13-00:17:31	past	elicitation (video stimuli)
lhəka	go	iterated achievement	PLUR BD ACH	dna	y	PFV	x	x	hi	x	Narr	past	AspMod	angkawura ('all.the.time') angkwababərna ('every day') V1-Ø	corrected glosses for angkawura + angkwababərna	angkawura angkwababərna nə-lhəka-Ø en=lhang=wa angalya	all.the.time always REAL.3M-go-USP 3M.PRO=POSS=ALL NEUT.place	‘he went to his house several times’	JL, JRB1-049-01, 00.09.25-00.09.34	past	elicitation (translation task)
adhərrə	spear; pierce	iterated achievement	PLUR BD ACH	dna	y	PFV	x	x	il	it lli	Narr	past	AspMod-PST XTD SoE DiscCon-PST	ngaw V0-RED-PST XTD-V1-∅ ekena V1-∅ kemba NEG V2-IRR-PST		ni-yen-jem-Ø ngaw n-a:::dhərra-Ø=m akən jurra ekena ne-jerrədhə-Ø=m akən jurr- jurra kemba nara=b kən-adhərre-na	REAL.3M-REDUP-do-PST CONT.ACT REAL.3M>NEUT-XTD.spear-USP=MUT NEUT.that NEUT.paper but REAL.3M-be.finished-USP=MUT NEUT.that NEUT.paper NEUT.paper then NEG=EMPH IRR.3M>NEUT-spear-PST	‘He kept on piercing the paper bag, but then he finished, then he didn’t pierce [it] anymore’	ST, JRB1-037-01, 00:25:09-00:25:18	past	elicitation (video stimuli)
lhəka	go	iterated achievement	PLUR BD ACH	dna	n	PFV	x	x	x	it	Narr	past	SoE parataxis?	ngaringka V1-∅ V1-∅		ngaringka yingə-lhəka-Ø yingə-lhəka-Ø	again REAL.3F-go-USP REAL.3F-go-USP	‘She kept on going’	Stokes 1971: 31	past	elicitation (translation task)
dhakba-jangu	grind; knock [+REFL]	activity bounded	PLUR BD ACT BD	n	y	PFV	x	t	x	c	Narr	past	SoE DiscCon	V0-PST akwa V1-Ø		nu-ruki+lyaka-ja-Ø=ma akwa nə-dhakba-jang-Ø=ma	REAL.3m>NEUT-stir-CAUS-USP=MUT and REAL.3M-grind-REFL-USP=MUT	‘he stirred and ground up [the food]’	ST, JRB1-029-03, 00.27.28-00.27.34	past	elicitation (video stimuli)
ruk+wulyaka-ja	stir; spin; turn.around	activity bounded	PLUR BD ACT BD	n	y	PFV	x	x	x	c	Narr	past	SoE DiscCon	V1-Ø akwa V2-Ø	could be durative perfective	nu-ruki+lyaka-ja-Ø=ma akwa nə-dhakba-jang-Ø=ma	REAL.3m>NEUT-stir-CAUS-USP=MUT and REAL.3M-grind-REFL-USP=MUT	‘he stirred and ground up [the food]’	ST, JRB1-029-03, 00.27.28-00.27.34	past	elicitation (video stimuli)
ruk+wulyaka-ja	stir; spin; turn.around	activity bounded	PLUR BD ACT BD	n	y	PFV	x	t	x	c	Narr	past	SoE DiscCon-PST	V1-Ø akwa V2-PST		n-aka nenəngkwarba nə-ruk+wulyaka-ja-Ø=ma, nu-rək+wulyaka-ja-Ø anhənga akwa n-errəngala-ng=ma	3M-this 3M.man REAL.3M>NEUT-stir-CAUS-USP=MUT REAL.3M>NEUT-stir-CAUS-USP NEUT.food and REAL.3M-itch-PST=MUT	‘The man stirred the food and ate it’	CW, JRB1-023-01, 00.24.42-00.25.06	past	elicitation (video stimuli)
ruk+wulyaka-ja	stir; spin; turn.around	activity bounded	PLUR BD ACT BD	n	y	PFV	x	t	x	c	Narr	past	SoE DiscCon-PST	V1-Ø akwa V2-PST		n-aka nenəngkwarba nə-ruk+wəlyaka-ja-Ø=ma anhənga akwa n-alyba-rnə=ma	3M-this 3M.man REAL.3M>NEUT-stir-CAUS-USP=MUT NEUT.food and REAL.3M-eat-PST=MUT	‘The man stirred the food and ate it’	CW, JRB1-023-01, 00.29.36-00.30.02	past	elicitation (video stimuli)
ruk+wulyaka-ja	stir; spin; turn.around	activity bounded	PLUR BD ACT BD	n	y	PFV	x	t	x	c	Narr	past	SoE DiscCon-PST	V1-Ø akwa V2-PST		n-akəna ni-yuwkujiya nəmə-rək+wulyaka-ja-Ø-ma… akwa n-andhey=ma	3M-that 3M.small REAL.3M>VEG-stir-CAUS-USP=MUT… and REAL.3M-look.PST=MUT	‘The boy turned [the wheel] around and looked out [of the binoculars]’	JL, JRB1-023-01, 00.36.30-00.36.58	past	elicitation (video stimuli)
njurrkwa-ja	move	bounded iterated activity	PLUR BD ACT BD	n	y	PFV-Weak	x	m	x	c	Narr	past	PstMod + SoE DiscCon	arakbəwiya V0-Ø akwa V1-Ø	PC - weak perfective	arakbəwiya n-aka nenəngkwarba nu-njurr-kwa-ja-Ø=ma akəna fridge=a ekena engkəbərrungwərrungwa or kamba ngə-nekibulu-Ø=m akəna	long.ago 3M-this 3M.man REAL.3M>NEUT-move-CAUS-USP=MUT NEUT.that NEUT.fridge=PF but NEUT.heavy then REAL.3M>NEUT(?)-give.up(?)-USP=MUT NEUT.that	‘Long time ago the man [tried to] move the fridge, but it was too heavy’ or ‘and so he gave up’	JL, JRB1-038-01, 00:13:47-00:14:06	past	elicitation (video stimuli)		frustrative
lhawurradhə	return	bounded iteration of achievement	PLUR MAX ACT	dna	y	PFV	x	x	x	pit	Narr	past	SoE-RED parataxis	V1-RED-∅ V2-∅		na-lhawu-lhawurradh-Ø, nuw-angkarra-Ø	REAL.NEUT-REDUP-return-USP REAL.NEUT-run-USP	‘It [the mother cat] kept going back, it ran off’	GL, A3369a Side 1 a3.4, Bujikeda ‘Mother cat’, 00.07.28-00.07.32	past	narrative
ngwurrukbalija	open(something)	iterated accomplishment	PLUR UBD ACC	n	y	PFV?	x	tm	ir	it	Backgr?	past	PstMod AspMod Iter-XTD-PST + RED.Echo	a:::rakbəwiya V1-∅ V2-XTD-PST ('do-ITER')		a:::rakbəwiya n-aka nanəngkwarba nu:::-ngurrkbalija-Ø=m akən fridge=la door=a ni-yen-jama:::-Ø nu-ngurrbalija-Ø=ma ni-dharra-Ø-ma ani nu-ngurrbalija-Ø=ma nganing ni-dharra-Ø=ma arakb-urakbəwiya	XTD.long.ago 3M-that 3M.man REAL.3M>NEUT.XTD-open-USP=MUT NEUT.that NEUT.fridge=LOC NEUT.door=PF REAL.3M-REDUP-do.XTD-PST REAL.3M>NEUT-open-USP=MUT REAL.3M>NEUT-close-USP=MUT ? REAL.3M>NEUT-open-USP=MUT ? REAL.3M>NEUT-close-USP=MUT REDUP-long.ago	‘a long, long time ago the man opened and closed the fridge over and over again’	ST, JRB1-037-02, 00:07:01-00:07:21	past	elicitation (video stimuli)
lhəka	go	iterated achievement or hab achievement	PLUR UBD ACH or HAB ACH	dna	y	PFV?	x	x	hi	x	Narr? Backgr?	past	AspMod	angkawura ('all the time') angkwababərnama ('every day') V1-Ø	corrected glosses for angkawura + angkwababərna	angkawura angkabəbərnama nə-lhəka-Ø en=lhang=wa angalya	all.the.time always REAL.3M-go-USP 3M.PRO=POSS=ALL NEUT.place	‘he always went from his place’	JL, JRB1-049-01, 00.11.56-00.12.05	past	elicitation (translation task)
lhəka	go	iterated achievement or hab achievement	PLUR UBD ACH or HAB ACH	dna	y	PFV?	x	x	hi	x	Narr? Backgr?	past	AspMod	angkabəbərnama ('every day') V1-Ø		angkabəbərnama nə-lhəka-Ø en=lhang=wa angalya always	always REAL.3M-go-USP 3M.PRO=POSS=ALL NEUT.place	‘he went to his house, several times, he went to his house’	JL, JRB1-049-01, 00.12.28-00.12.44	past	elicitation (translation task)
lhəka	go	iterated achievement or hab achievement	PLUR UBD ACH or HAB ACH	dna	y	IMPFV?	x	m	hi	x	Backgr (Hab)?	past	PstMod + AspMod	arakbəwiya angkabəbərnama V1-Ø		arakbəwiya angkabəbərnama nə-lhəka-Ø en=lhang=wa angalya	long.ago always REAL.3M-go-USP 3M.PRO=POSS=ALL NEUT.place	‘like several times, many times, or several times he used to- went- walked to his house’	JL, JRB1-049-01, 00.13.00-00.13.20	past	elicitation (translation task)
ruk+wulyaka-ja	stir; spin; turn.around	iterated semelfactive	PLUR UBD SEM	n	y	IMPFV	x	tm	x	co	BackFore	past	Sim-PST Overlap-PST	V0-PST akwa V1-Ø, V2-PST akwa V3-PST	Bck on 'stir'	yarrungkwa nu-wilyaba nenəngkwarba nə-murrkulhə=ma eni=lhang=ma murrkwa akwa nə-rukwi+lyakaja-Ø=ma anhənga en-aja nu-wilyaba nenəngkwarba nə-lhəke-na akwa nə-kwa+bijangu-nə=ma	yesterday 3M-one 3M.man REAL.3M-lie.down.PST=MUT 3M.PRO=POSS=INST VEG.stomach and REAL.3M-stir-USP=MUT NEUT.food 3M.PRO-CofR 3M-one 3M.man REAL.3M-go-PST and REAL.3M-jump-PST=MUT	‘yesterday the man was lying down on his stomach, he stirred the food, [and] another man went past and jumped’	CW, JRB1-032-01, 00.21.23-00.22.05	past	elicitation (video stimuli)
ruk+wulyaka-ja	stir; spin; turn.around	iterated semelfactive	PLUR UBD SEM	n	y	IMPFV	x	t	x	o	BackFore	past	Back-Fore-PST Overlap-PST DiscCon	V0-Ø V1-PST	Fore on following V	n-akəna nenəngkwarba nu-rukwi+lyakaja-Ø=ma anhənga ena-ja nu-wilyaba nenəngkwarba nenu-kwa-Ø=ma ayika	3M-that 3M.man REAL.3M>NEUT-stir-USP=MUT NEUT.food 3M.PRO-CofR 3M-one 3M.man REAL.3M>3M-give-PST=MUT NEUT.stick	‘The man stirred the food and the other man gave him the stick’	CW, JRB1-032-01, 00.28.50	past	elicitation (video stimuli)
ruk+wulyaka-ja	stir; spin; turn.around	iterated semelfactive	PLUR UBD SEM	n	y	IMPFV	x	tm	x	co	BackFore	past	PstMod + SoE-PST parataxis + SoE DiscCon	yarrungkwa V1-Ø V2-PST akwa V3-Ø	Bck on 'stir'	yarrungkwa n-akəna nenəngkwarba nu-rukwi+lyakaja-Ø=ma anhənga ene-ja nu-wilyaba nenəngkwarba nenu-kwa-Ø=ma ayika akwa nu-rukwu+lyakaja-Ø=ma	yesterday 3M-that 3M.man REAL.3M>NEUT-stir-USP=MUT NEUT.food 3M.PRO-CofR 3M-one 3M.man REAL.3M>3M-give- PST=MUT NEUT.tree and REAL.3M>NEUT-stir-USP=MUT	‘the man was stirring the food, the other man give him a stick, and he kept stirring the food’	CW, JRB1-032-01, 00.29.45	past	elicitation (video stimuli)
ruk+wulyaka-ja	stir; spin; turn.around	iterated semelfactive	PLUR UBD SEM	n	y	IMPFV	x	x	i	x	Backgr?	past	AspMod + Overlap DiscCon	akwa n-irribərriba (3sg.keep.on) V1-∅		akwa n-irribərriba nu-rukwə+lyakaja-Ø=ma	and 3M-keep.on REAL.3M>NEUT-stir-USP=MUT	‘he was keep on stirring’	CW, JRB1-032-01, 00.30.45	past	elicitation (video stimuli)
arrangba	collect	accomplishment	Q INCR	closed max	y	PFV	x	tm	x	c	Narr	past	PstMod + SoE DiscCon-PST	yarrungkwa V1-Ø akwa V2-PST akwa V3-PST		yarrungkwa n-akən nenəngkwarba n-arrangba-Ø=ma ayika-murriya akwa nə-ləraka-Ø angwura akwa nə-dhaka-Ø amadhangkwa yiburadha=lhangwa	yesterday 3M-that 3M.man REAL.3M-collect-USP=MUT NEUT.tree-the.rest and REAL.3M-light.fire-PST NEUT.fire and REAL.3M-cook-PST NEUT.meat MASC.wallaby=POSS	‘Yesterday the man collected the firewood, made a fire, and roasted the wallaby meat’	JL, JRB1-034-01, 00.20.02-00.20.37	past	elicitation (translation task)
dhakba-jangu	grind; knock [+REFL]	accomplishment	Q INCR	n	y	PFV	x	x	x	x	Narr	past	∅?	V1-Ø		nə-dhakba-jangu-Ø=ma	REAL.3M-grind-REFL-USP=MUT	‘[he] ground up [the food]’	JL, JRB1-029-03, 00.27.50-00.27.53	past	elicitation (video stimuli)
dhakba-jangu	grind; knock [+REFL]	accomplishment	Q INCR	closed max	y	PFV	x	x	x	c	Narr	past	SoE DiscCon	akwa V1-∅	translation suggests 'grind' is in fact an accomplishment verb. So non-culminating readings might be PC (partitive culminations)	akwa na-dhakba-jangu-Ø=ma	and REAL.3M-grind-REFL-USP=MUT	‘and he ground up [the food]’	JL, JRB1-029-03, 00.27.14	past	elicitation (video stimuli)
dhərra	shut; close	accomplishment	Q INCR	closed max	y	PFV	x	tm	ir	it lli	Narr	past	PstMod + IterPred + XTD + SoE parataxis-PST	a:::rakbəwiya XTD-V-1-∅ XTD-V0('do')-RED-PST V1-∅ V-1'-∅ V1'-∅	first lengthening is not LLI; second, unclear; multiple red patterns (incl. Echo RED)	a:::rakbəwiya n-aka nanəngkwarba nu:::-ngurrkbalija-Ø=m akən fridge=la door=a ni-yen-jama:::-Ø nu-ngurrbalija-Ø=ma ni-dharra-Ø-ma ani nu-ngurrbalija-Ø=ma nganing ni-dharra-Ø=ma arakb-urakbəwiya	XTD.long.ago 3M-that 3M.man REAL.3M>NEUT.XTD-open-USP=MUT NEUT.that NEUT.fridge=LOC NEUT.door=PF REAL.3M-REDUP-do.XTD-PST REAL.3M>NEUT-open-USP=MUT REAL.3M>NEUT-close-USP=MUT ? REAL.3M>NEUT-open-USP=MUT ? REAL.3M>NEUT-close-USP=MUT REDUP-long.ago	‘a long, long time ago the man opened and closed the fridge over and over again’	ST, JRB1-037-02, 00:07:01-00:07:21	past	elicitation (video stimuli)
kw+arrangə	cut	accomplishment	Q INCR	closed max	y	PFV	x	m	x	x	Narr	past	PstMod	yarrungkwa V1-Ø	probably not an achievement	yarrungkwa n-akəna nenəngkwarba nu-kw+arrangu-Ø=ma amamərerra ayika	yesterday 3M-that 3M.man REAL.3M>NEUT-half+cut-USP=MUT NEUT.branch NEUT.tree	‘The man cut the branch of a tree’	JL, JRB1-024-01, 00.23.12-00.23.34	past	elicitation (video stimuli)
kw+arrangə	cut	accomplishment	Q INCR	closed max	y	PFV	x	x	x	x	Narr	past	∅?	V1-∅		dh-akəna dhədharrəngka yungu-kw+arrangu-Ø=ma bread=a	3F-that 3F.woman REAL.3F>NEUT-half+cut-USP=MUT NEUT.bread=PF	‘The woman cut the bread’	JL, JRB1-032-01, 00:02:22-00:02:29	past	elicitation (translation task)
kwarra	break; break.up	accomplishment	Q INCR	closed max	y	PFV	x	x	x	x	Narr	past	∅	V1-∅		n-akəna nenəngkwarba nu-kwarra-Ø=m ayika saw	3M-that 3M.man REAL.3M>NEUT-break.up-USP=MUT NEUT.tree NEUT.saw	‘The man broke the tree [with a] saw’	CW, JRB1-032-01, 00.07.23	past	elicitation (video stimuli)
lhəkəraka	build.something	accomplishment	Q INCR	closed max	y	PFV	x	m	x	x	Narr	past	PstMod	yarrungkwa V1-∅		yarrungkwa n-akəna nenəngkwarba nə-lhəkəraka-Ø alhəkəra	yesterday 3M-that 3M.man REAL.3M>NEUT-build-USP NEUT.house	‘Yesterday that man built a house’	JL, JRB1-060-02, 00.01.33-00.01.38	past	elicitation (flash card stimuli)
marerrəmaja	hang.out(something)	accomplishment	Q INCR	closed max	y	PFV	x	x	x	x	Narr	past	∅?	V1-Ø		dh-akəna dhədharrəngka yingu-marerrəmaja-Ø=ma dumbala line=manja	3F-that 3F.woman REAL.3F-hang.out-USP=MUT FEM.clothes NEUT.line=LOC	‘The woman hung out the clothes on the line’	CW, JRB1-032-01, 00.24.19	past	elicitation (video stimuli)
marerrəmaja	hang.out(something)	accomplishment	Q INCR	closed max	y	PFV	x	t	x	x	Narr	past	∅?	V1-Ø		yarrungkwa dh-akəna dhədharrəngka ying-mərerrəmaja-Ø=ma dumbala	yesterday 3F-that 3F.woman REAL.3F-hang.out-USP=MUT FEM.clothes	‘The woman hung out the clothes’	CW, JRB1-032-01, 00.25.29	past	elicitation (video stimuli)
marerrəmaja	hang.out(something)	accomplishment	Q INCR	closed max	y	PFV	x	t	x	c	Narr	past	SoE DiscCon-PST	V1-Ø aken V2-PST		dh-akan dhədharrəngka ying-merrimaja-Ø=ma dhumbala aken n-aka nanəngkwarba nangə-kwa-Ø-m dejik=dha	3F-that 3F.woman REAL.3F-hang.out-USP=MUT FEM.clothes then 3M-that 3M.man REAL.3M>3F-give-PST=MUT NEUT.thing=TRM	‘The woman hung the clothes out, then the man gave her something’	ST, JRB1-032-01, 00:13:13-00:13:31	past	elicitation (video stimuli)
marerrəmaja	hang.out(something)	accomplishment	Q INCR	closed max	y	PFV	x	tm	x	cc	Narr	past	PstMod + SoE DiscCon-PST	yarrungkwa V1-Ø akəna V2-PST biya V3-PST		dh-akən dhədharrəngka yarrungkwa ying-merrəmaju-Ø=ma akəna dhumbala biya n-akəna nanəngkwarba ni-ləka-n ngaluwə-wa biya yinga-ma-ng akəna amdejika	3F-that 3F.woman yesterday REAL.3F-hang.out-USP=MUT NEUT.that FEM.clothes and.then 3M-that 3M.man REAL.3M-go-PST 3F.PRO=ALL and.then REAL.3F-take-PST NEUT.that NEUT.that	‘Yesterday the woman hung out the clothes and then the man went to her and took something from her’	ST, JRB1-037-02, 00:15:10-00:15:27	past	elicitation (video stimuli)
ngkə+lharrə	fall	accomplishment	Q INCR	closed max	y	PFV	x	t	x	c	Narr	past	SoE-PST DiscCon	V0-PST akwa V1-Ø		n-aka nənəngkwarba ma-rəngadha-ngu=ma banana=lhangwa mama ayika akwa nəmi-ngkə+lharrə-Ø=m=dha	3M-this 3M.man REAL.3M>VEG(?)-cut.up-PST=MUT banana=ABL VEG.trunk NEUT.tree and REAL.VEG-?+fall-USP=MUT=TRM	‘The man cut up the banana tree and [it] fell down’	ST, JRB1-029-03, 00.20.42	past	elicitation (video stimuli)
ngwurrukbalija	open(something)	accomplishment	Q INCR	closed max	y	PFV	x	t	x	co	ForeBack/Explanation	past	SoE Overlap-PST	V1-∅ V2-PST		n-aka nanəngkwarba nu-ngwurrukbalija-Ø=ma akəna door=a akəna frigereyda n-abəringke-nə=m anhənga	3M-this 3M.man REAL.3M>NEUT-open-USP=MUT NEUT.that NEUT.door=PF NEUT.that NEUT.refrigerator REAL.3M-look.for-PST=MUT NEUT.food	‘The man opened the fridge door, looking for food’	ST, JRB1-037-02, 00:05:13-00:05:23	past	elicitation (video stimuli)
ngwurrukbalija	open(something)	accomplishment	Q INCR	closed max	y	PFV	x	tm	x	co	ForeBack/Explanation	past	PstMod SoE GoalSub-IRR-PST	yarrungkwa V1-∅ V2-IRR-PST=PURP		n-aka nanəngkwarba yarrungkwa nu-ngwurrkablija-Ø=ma akən door=a akən fridge=a kajungwa kən-abərungke-ni=yadh anhənga	3M-that 3M.man yesterday REAL.3M>NEUT-open-USP=MUT NEUT.that NEUT.door=PF NEUT.that NEUT.fridge=PF so.that IRR.3M-look.for-PST=PURP NEUT.food	‘Yesterday the man opened the fridge door, in order to look for food’	ST, JRB1-037-02, 00:05:28-00:05:36	past	elicitation (video stimuli)
ngwurrukbalija	open(something)	accomplishment	Q INCR	closed max	y	PFV	x	t	dir	it lli	Narr	past	AspMod Iter SoE-PST + Overlap-PST	n-ərribərriba (3sg.keep.on) arngkəbəbərnama ('many.time') V1-∅ V2-PST V3-PST V4-∅ V5-PST V6-∅		n-aka nanəngkwarba n-ərribərriba arngkəbəbərnama nu-ngwurrkbalija-Ø-ma akən door akəna fridge-a n-abəringke-nə-m anhənga nə-dhərra-ngə=wanə nu-ngwurrkbalija-Ø=ma nə-dhərra-ngə=wanə nu-ngwurrkbalija-Ø-ma n-ərribərriba arngkəbəbənama	3M-that 3M.man 3M-keep.on all.day REAL.3M>NEUT-open-USP=MUT NEUT.that NEUT.door NEUT.that NEUT.fridge REAL.3M-look.for-PST=MUT NEUT.food REAL.3M>NEUT-close-PST=EMPH? REAL.3M>NEUT-open-USP=MUT REAL.3M>NEUT-close-PST=EMPH? REAL.3M>NEUT-open-USP=MUT 3M-keep.on all.day	‘he opened it and he closed it, he opened it and he closed it, he closed the door, opened it, kept going all day’	ST, JRB1-037-02, 00:05:51-00:06:10	past	elicitation (video stimuli)
ngwurrukbalija	open(something)	accomplishment	Q INCR	closed	y	PFV	x	tm	x	c	Narr	past	SoE DiscCon-PST	V1-∅ kina ('then') V2-PST		n-aka nenəngkwarba n-ambijangaja-Ø-ma akəna brijərayda=lhanga door=a kina ni-kamadhə-nə=ma	3M-that 3M.man REAL.3M>NEUT-open-USP=MUT NEUT.that NEUT.refridgerator=POSS NEUT.door=PF then REAL.3M-feel.upset-PST-MUT	‘The man opened the fridge and felt sad’	CW, JRB1-037-02, 00:10:36-00:10:46	past	elicitation (video stimuli)
ngwurrukbalija	open(something)	accomplishment	Q INCR	closed	y	PFV	x	t	x	p	Narr	past	SoE-PST parataxis	enenuwiya ('now') V-1-NPST ekena V0-PST V1-∅	not a very coherent example? Or speaker 'lapses' into PST as soon as SoE?	enenuwiya akən nə-ngwurrbalij-na=m akəna door=a ekena ni-kamadhə-nə=ma nanəkabə- ənəngudh- nə-ngurrbaliji-Ø=yedha akəna akudhijung door=a akənə=ng brijərayda=dha	now NEUT.that REAL.3M>NEUT-open-NPST=MUT NEUT.that NEUT.door=PF then REAL3M-feel.upset-PST=MUT REAL.3M>NEUT-open-USP=PURP NEUT.that NEUT.door NEUT.door=PF NEUT.that=POSS NEUT.refridgerator=TRM	‘The man opened the door just now and felt upset’	ST, JRB1-037-02, 00:09:55-00:10:23	past	elicitation (video stimuli)
wərumbi-ja	cover.something	accomplishment	Q INCR	closed max	y	PFV	x	tm	x	c	Narr	past	PstMod SoE-PST DiscCon	yarrungkwa V0-PST akwa V1-Ø		yarrungkwa n-aka nenəngkwarba nə-lyinga-Ø=ma akəna lyelyinga en=lhang=manja ayerrka akwa nu-wərumbi-ja-Ø=ma akəna lyelyinga jurra=ma	yesterday 3M-this 3M.man REAL.3M>NEUT-hold-PST=MUT NEUT.that NEUT.knife 3m.PRO=POSS=LOC NEUT.hand and REAL.3M-cover-CAUS-USP=MUT NEUT.that NEUT.knife NEUT.paper=INST	‘Yesterday the man held the knife in his hand and covered it with the paper’	JL, JRB1-029-03, 00.05.38-00.06.07	past	elicitation (video stimuli)
eburrəwendi-ja	cover.something	accomplishment/state	Q INCR/CUM	closed max/n	y	IMPFV	x	x	x	c	Backgr	past	DiscCon SoE	kemba V1-Ø	translation is a bit strange given 'kemba'	kemba n-eburrəwendhi-ja-Ø-ma jurra=ma	then REAL.3M>NEUT-cover-CAUS-USP=MUT NEUT.paper=INST	‘he was covering that knife with the brown paper’ (strange translation given 'kemba'; looks more like 'then he covered')	JL, JRB1-029-03, 00.04.13-00.04.18	past	elicitation (video stimuli)
lyangk+wama-ja	blink	semelfactive	SEM ATM	b	y	PFV	x	x	x	x	Narr	past	∅	V1-Ø		n-aka nenəngkwarba nəma-lyangk+wama-ja-Ø-ma	3M-this 3M.man REAL.3M<VEG-head+nod-CAUS-USP=MUT	‘He blinked [his eye]’	CW, JRB1-023-01, 00.13.32-00.13.40	past	elicitation (video stimuli)
lyangk+wama-ja	blink	semelfactive	SEM ATM	b	y	PFV	x	x	x	x	Narr	past	∅	V1-Ø		nəma-lyangk+wəma-ja-Ø-ma	REAL.3M<VEG-head+nod-CAUS-USP=MUT	‘He blinked [his eye]’	JL, JRB1-023-01, 00.13.44-00.13.46	past	elicitation (video stimuli)
lyangk+wama-ja	blink	semelfactive	SEM ATM or PLUR SEM BD	b	y	PFV	x	m	x	x	Narr	past	PstMod	yarrungkwa V1-Ø		yarrungkwa n-akəna nenəngkwarba numa-lyangk+wama-ja-Ø-ma menba	yesterday 3M-that 3M.man REAL.3M<VEG-head+nod-CAUS-USP=MUT VEG.eye	‘Yesterday the man blinked his eye’	JL, JRB1-023-01, 00.15.54-00.16.12	past	elicitation (video stimuli)
mədhilyakbə	cough	semelfactive	SEMELF BD	dna	n	PFV	x	t	x	cc	Narr	past	SoE DiscCon-IRR.PST	V-2-∅ akwa V-1-∅ akwa kamba V0-∅ V1-∅ V2-IRR-PST	CofS affix +-∅ or did you change your mind? Anin texts is rather: 'he came and sat down, sneezed, then stood up and walked away'	n-akən nanəngkwarba nə-lhəka-Ø=ma n-ambarr-nga=ma akən-manja chair=a akwa nə-mədhilyakbə-Ø-ma akwa kamba nə-kw-aji-nga=ma kənə-lhəka-nə=ma	3M-that 3M.man REAL.3M-go-USP=MUT REAL.3M-sit-CofS=MUT NEUT.that=LOC chair=PF and REAL.3M-cough-USP=MUT and then REAL.3M-half(?)-be.upright-CofS=MUT IRR.3M-go-PST=MUT	‘he stood up, coughed, and walked away’	ST, JRB1-037-01, 00:31:11-00:31:21	past	elicitation (video stimuli)
ararurrmaja	dry(something)	hab accomplishment	STATE HAB	n	y	IMPFV	x	t	h	g	Backgr	past	Overlap-PST RED (Hab)	V0-PST RED-V1-Ø		yirra-rrbə-rrəngka-Ø=ma na-yan-jamarrka-Ø=ma yakwujina adhalyəma=manja narrəma-mərndak-ajirra-ngə=ma dhəmbalha-mərriya narrəma-mərndak-ara-rurrmaja-Ø=ma karrawara amarda-mirriya=manja	REAL.1A>3A-REDUP-see-PST=MUT REAL.3A-REDUP-how.to.do-PST=MUT there NEUT.river=LOC REAL.3A>VEG-many-wash-PST=MUT VEG.clothes-the.rest REAL.3A>VEG-many-REDUP-dry-USP=MUT above NEUT.grass-the.rest=LOC	‘We used to watch older women at the river wash their clothes and dry [them] on dry grasses’	JL, JRB1-007-01, 00.00.56-00.01.09	past	narrative
marerrəmaja	hang.out(something)	hab accomplishment	STATE HAB	dna	y	IMPFV	x	tm	x	cc	Backgr	past	PstMod + SoE DiscCon-PST	arakb-ərakbəwiya V1-∅ biya V2-PST biya V3-PST		arakb-ərakbəwiya dh-akan dhədharrəngka ngalang=manj angalya ying-merrəmaja-Ø-m akən dhubala biya n-akən nanəngkwarba nə-ləka-rna ngaluwə-wa biya dh-akəna yinga-ma-ng akən amdejika enuwa=lhanga	REDUP-long.ago 3F-that 3F.woman 3F.PRO=LOC NEUT.place REAL.3F-hang.out-USP=MUT NEUT.that FEM.clothes and.then 3M-that 3M.man REAL.3M-go-PST 3F.PRO=ALL and.then 3F-that 3F-take-PST NEUT.that NEUT.thing 3M.PRO=ABL	‘A long time ago the woman hung the clothes out in that place and then the man went to her and she took something from him’	ST, JRB1-037-02, 00:15:46-00:16:03	past	elicitation (video stimuli)
wara	rise; get.up	hab achievement	STATE HAB	dna	n	IMPFV	x	x	hi	g	Backgr	past	AspMod Hab	V1-∅ arngkawura ('all the time')	Translation?? 'he slept well as a baby, now sometimes he gets up, sometimes he sleeps'	wurri-yukwujiya wurru-wanki-yukwujiya wurr-angariya wurr-abarda marrnga akən nə-wara-Ø-mə=dha arngkawura nu-mkulha=ma n-akən marrnga	COLL-small COLL-DIM-small COLL-baby COLL-good VEG.sleep NEUT.that REAL.NEUT-get.up-USP=MUT=TRM sometimes REAL.NEUT-sleep.NPST=MUT 3M-that VEG.sleep	‘so when he was a baby he slept all the time, now he's grown he sleeps now and then’	ST, JRB1-037-01, 00:13:59-00:14:19	past	elicitation (video stimuli)
angkarrə	run	hab iterated achievement	STATE HAB	n	y	IMPFV	x	t	li	g	Backgr	past	PstMod-XTD + AspMod Iter + SoE DiscCon	a:::rakbəwiya n-ərribərriba V0-Ø biya V1-Ø	Durative bounded?	n-aka nanəngkwarb a:::rakbəwiya n-ərribərriba n-adhakba-ja-Ø=m door=manja biya nanga wurr-akəna warnmamalya ambəlyuma aləlbaj akən=manj angalya n-angkarrə-Ø=m yedhakəna	3M-that 3M.man XTD.long.ago 3M-keep.on REAL.3M-knock-REFL-USP=MUT NEUT.door=LOC and.then ? 3A-that 3A.person NEUT.two ? NEUT.that=LOC NEUT.place REAL.3M-run-USP=MUT that.way	‘A long time ago the man used to keep knocking on the door and then the other man ran that way’	ST, JRB1-037-02, 00.19.55-00.20.07	past	elicitation (video stimuli)
jungwa	die	achievement	ATM	b	n	PERF	x	x	x	cr	Perf context	past>present	PerfMod Matrix-∅(PERF) >> ObjCl	arakba V0-∅ >> V1-∅	inceptive/achievement reading of perception V	yirrə-rrəngka-Ø=ma arakba ngayuwa nəng-enibu-dhə-Ø=ma amandhangwa nəngi-jungwu-Ø=mərra=dha	REAL.2A-see-PST=MUT COMPL.ACT 1.PRO REAL.1-alive-INCH-USP=DEP true REAL.1-die-USP=MUT=TRM	‘Now you have seen that I really am alive again [it’s true that I died before]’	Bible Society in Australia 1992: 890	present	narrative (text translation)
jungwa	die	achievement	ATM	b	n	PERF	i	m	x	cr	Argu Deon	past>present	PerfMod	V1-∅ arakba ('now that…') V2-NPST		“ni-jungwu-Ø=ma arakba naw-ena, əmba Ø-lhəka-ja arakba dh-ibinu=wa dhadhingiy-enikba jeyi	REAL.3M-die-USP=MUT COMPL.ACT 3M.brother-2.KIN but DEON.2-go-NPST COMPL.ACT 3F-that.same=ALL 3F.wife-3M.KIN go!	“Now that your brother has died, go to his widow”	Bible Society in Australia 1992: 312	past	narrative (text translation)
ngkə+lharrə	fall	achievement	ATM	b	n	PERF	x	x	x	r	Argu Epist	past>present	PerfMod	abad ('already') V1-∅		akəna eyika ebina ngaya ngu-lung+kwabija-Ø=ma dhukwa arakba akəna enuwə- enungkuraba akwa a-warnk-amiyerra nuw-ambilyu=m=ba biya yakwujina dhuk enukurab akən abab dhuku ne-ngkə+larra-Ø ajurungku=dha	NEUT.that NEUT.tree NEUT.that.same 1.PRO REAL.1-grow-USP=MUT maybe COMPL.ACT NEUT.that NEUT.old and NEUT-DIM-long.time REAL.NEUT-stay.PST=MUT=EMPH and.then there maybe NEUT.old NEUT.that COMPL.ACT maybe REAL.NEUT-?+fall-USP NEUT.ground=TRM	‘The tree grew already, maybe it’s already old, maybe it fell down to the ground’	JL, JRB1-042-01, 00:14:38-00:14:56	past	elicitation (translation task)		epistemic
yedha	arrive	achievement	ATM	b	n	PERF	x	x	x	r	Argu Epist	past>present	EpistMod PerfMod	dhukwa arakba V1-∅		dhukwa arakb ni-yedha-Ø-m=dha ni-yedha-nga	maybe COMPL.ACT REAL.3M-arrive-USP=MUT=TRM REAL.3M-arrive-PST	‘Maybe he already arrived’	JL, JRB1-042-01, 00:11:26-00:11:42	past	elicitation (translation task)		epistemic
lung+kwabija	grow; plant	accomplishment	I INCR	closed max	n	PERF	x	x	x	r	Perf context	past>present	∅ PerfectMod	V1-∅ < arakba PROP		akəna eyika ebina ngaya ngu-lung+kwabija-Ø=ma dhukwa arakba akəna enuwə- enungkuraba akwa a-warnk-amiyerra nuw-ambilyu=m=ba biya yakwujina dhuk enukurab akən abab dhuku ne-ngkə+larra-Ø ajurungku=dha	NEUT.that NEUT.tree NEUT.that.same 1.PRO REAL.1-grow-USP=MUT maybe COMPL.ACT NEUT.that NEUT.old and NEUT-DIM-long.time REAL.NEUT-stay.PST=MUT=EMPH and.then there maybe NEUT.old NEUT.that COMPL.ACT maybe REAL.NEUT-?+fall-USP NEUT.ground=TRM	‘The tree grew already, maybe it’s already old, maybe it fell down to the ground’	JL, JRB1-042-01, 00:14:38-00:14:56	present	elicitation (translation task)
enibu-dhə	be.alive; become.alive	CofS/state	INCH ATM	b	n	PERF	x	x	x	cr	Perf context	past>present	PerfMod Matrix-∅(PERF) >> ObjCl	arakba V0-∅ >> V1-∅ ('now' + result)	you have seen that I have become alive again'	yirrə-rrəngka-Ø=ma arakba ngayuwa nəng-enibu-dhə-Ø=ma amandhangwa nəngi-jungwu-Ø=mərra=dha	REAL.2A-see-PST=MUT COMPL.ACT 1.PRO REAL.1-alive-INCH-USP=MUT true REAL.1-die-USP=MUT=TRM	‘Now you have seen that I really am alive again [it’s true that I died before]’	Bible Society in Australia 1992: 890	present	narrative (text translation)
angkarrə	run	activity	CUM	dna	y	IMPFV	x	x	x	x	Backgr	present	∅	V1-Ø		n-angkarra-Ø	REAL.3M-run-USP	‘[he] runs’ (JB asks ‘and is that for now or before?’, JL replies ‘now’)	JL, JRB1-060-02, 00.25.33-00.25.38	present	elicitation (video stimuli)
angkarrə	run	activity	CUM	dna	y	IMPFV	m	x	x	x	Backgr	present	PrMod 'now'	V1-Ø		n-angkarra-Ø, now, n-angkarra-Ø	REAL.3M-run-USP REAL.3M-run-USP	‘[he] runs’	JL, JRB1-060-02, 00.27.39-00.27.42	present	elicitation (video stimuli)
engkərrka	think; listen	activity	CUM	n	y	IMPFV	x	x	x	x	Backgr	present	∅?	V1-∅		n-aka nenəngkwarba n-engkirrka-Ø	3M-this 3M.man REAL.3M-think-USP	‘that man, he think[s]’	JL, JRB1-049-01, 00.48.45-00.48.50	present	elicitation (translation task)
engkərrka	think; listen	activity	CUM	n	y	IMPFV	i	x	x	o	Backgr	present	RED-Ech + V-PR	V1-∅ V2-∅ V3-∅ V4-NPST		n-akəna nenəngkwarba n-engkirrka-Ø n-engkirrka-Ø n-engkirrka-ja-ma=na?, n-engkirrka-Ø	3M-that 3M.man REAL.3M-think-USP REAL.3M-think-USP REAL.3M-think-NPST=MUT=TAG REAL.3M-think-USP	‘the man’s thinking’	JL, JRB1-049-01, 00.49.24-00.50.06	present	elicitation (translation task)			JL: ‘yeah that's right, neng- yeah, he's thinking, that man is thinking, naka nenəngkwarba nengkirrkajama, or nakəna nenəngkwarba nengkirrkajawiya, he's thinking, like nengkirrkajawiya, or nakəna nenəngkwarba nengkirrka, he's..’
mebi	sing	activity	CUM	n	y	IMPFV	x	x	x	x	Backgr	present	∅?	V1-∅		n-akəna nenəngkwarba nə-mebu-Ø=ma	3M-that 3M.man REAL.3M-sing-USP=MUT	‘the man is singing’	JL, JRB1-049-01, 00.25.23-00.25.50	present	elicitation (translation task)			JL: ‘he sang a song, nəmebuma, nəmebuma, it's singing. Yeah, that man is singing, yeah nakəna nenəngkwarba nəmebuma, he was singing, yeah, he [is] singing, like he's singing now, nakəna nenəngkwarba nəmebuma’
mureye	be.hungry	Unbounded CoS	CUM SCAL	open relative	n	IMPFV	x	x	x	x	Backgr	present	∅	V1-∅	Cofs root in fact	abərruwa narra-mərndakə-murey-mureya-Ø	3A.PRO REAL.3A-many-REDUP-be.hungry-USP	‘They getting [really] hungry’	JL, fieldnotes, 19/11/2018	present	elicitation (translation task)
alyadhə	hang	state	CUM STATE	n	n?	IMPFV	x	x	x	x	Backgr	present	∅	V1-Ø		n-aka nenəngkwarba n-alyadhə-Ø=ma	3M-this 3M.man REAL.3M-hang-USP=MUT	‘he['s] just hanging’	JL, JRB1-022-01, 00.03.53-00.04.00	present	elicitation (video stimuli)
alyadhə	hang	state	CUM STATE	n	n?	IMPFV	x	x	x	x	Backgr	present	∅	V1-Ø		n-alyadhə-Ø=ma	REAL.3M-hang-USP=MUT	‘[he’s] hanging’	JL, JRB1-022-01, 00.04.18-00.04.23	present	elicitation (video stimuli)
dhəka-junga	be.closed [+REFL]	state	CUM STATE	dna	n	IMPFV	x	x	x	c	Backgr	present	TempShift DiscCon	V0-PST akwa V1-∅		akəna door=a na-ngwudhangmə-nə=ma akwa na-dhəka-jung-Ø=ma	NEUT.that NEUT.door=PF NEUT-be.open-PST=MUT and REAL.NEUT-close-REFL-USP=MUT	‘The door was open, and [now] it’s closed’	JL, JRB1-023-01, 00.01.25-00.01.37	present	elicitation (video stimuli)
kukwangba	be.excited; get.excited	state	CUM STATE	dna (open relative)	n	IMPFV	x	x	x	x	Backgr	present	∅	V1-∅		“nə-kukwangba-Ø=mərra y-aka yimarndakuwaba. nungkwa=lhangwa”	REAL.3M-be.excited-USP=MUT MASC-that MASC.blue.tonged.lizard 2.PRO=POSS	“He is so excited about this blue-tongued lizard. It's yours!”	Kwurrirda Kwurrirda-langwa, A3369a Side1 a3.3	present	narrative
mureye	be.hungry	state	CUM STATE	dna	n	IMPFV	x	x	x	x	Backgr	present	∅?	V1-Ø		ngayuwa ngu-məreya-Ø anhəngu=wa	1.PRO REAL.1-be.hungry-USP food=ALL	‘I’m hungry for food’	JL, JRB1-050-01, 00.15.27-00.15.32	present	elicitation (video stimuli)
mureye	be.hungry	state	CUM STATE	dna	n	IMPFV	m	x	x	x	Backgr	present	PrMod	adhuwaba V1-Ø		adhuwaba n-aka nenəngkwarba nu-məreya-Ø	today 3M-this 3M.man REAL.3M-be.hungry-USP	‘Today the man’s hungry’	JL, JRB1-050-01, 00.16.29-00.16.32	present	elicitation (video stimuli)
mureye	be.hungry	state	CUM STATE	dna	n	IMPFV	x	x	x	x	Backgr	present	∅?	V1-Ø		n-angaba nenəngkwarba nu-mrey-Ø=dha	3M-that.one 3M.man REAL.3M-be.hungry-USP=TRM	‘that man, he’s hungry’	JL, JRB1-050-01, 00.19.05-00.19.13	present	elicitation (video stimuli)
mureye	be.hungry	state	CUM STATE	dna	n	IMPFV	x	x	x	x	Backgr	present	∅			ngu-mreya-ngu-ma, past, ngu-məreya-Ø, now, ngu-mreye-na, in the middle	REAL.1-be.hungry-PST=MUT REAL.1-be.hungry-USP REAL.1-be.hungry-NPST	missing translation	JL, JRB1-050-01, 00.15.46-00.15.54	present	elicitation (video stimuli)
ngwədhangma	be.open	state	CUM STATE	n	n	IMPFV	x	x	x	x	Backgr	present	∅	V1-Ø		na-ngwədhangma-Ø	REAL.NEUT-be.open-USP	‘the door is open’	JL, JRB1-023-01, 00.02.10-00.02.16	present	elicitation (video stimuli)
ngwədhangma	be.open	state	CUM STATE	n	n	IMPFV	x	t	x	c	BackFore+TempShift	present	TempShift DiscCon-PST	V1-Ø akwa V2-PST	temporal switch!	akəna door-a na-ngwudhangma-Ø akwa na-dhəka-jungu-nə-ma	NEUT.that NEUT.door REAL.NEUT-be.open-USP and REAL.NEUT-be.closed-REFL-PST=MUT	‘the door is open, and then it got shut’	JL, JRB1-023-01, 00.01.54-00.02.02	present	elicitation (video stimuli)
bulwanda	bend.down	accomplishment	I INCR	closed max	y	IMPF	x	t	x	x	Backgr	present	∅	V1-Ø		ne-bulwanda-Ø=ma	REAL.3M-bend.down-USP=MUT	‘[he’s] bending down’	JL, JRB1-023-01, 00.35.26-00.35.32	present	elicitation (video stimuli)
ardija-ja	call(someone)	iterated achievement	PLUR UBD ACH	dna	y	IMPFV	x	x	x	r	Back/Explanation	present	Question - PR	V-1-PST V0-PST V1-∅	Perfect-inferential context	aba ni-yamarrka-Ø-me=ka n-aka, ni-yamarrka-Ø-murra=bena n-ardija-ju-Ø-murra?	NEUT.that.over.there REAL.3M-doing.what-PST=MUT=EMPH 3M-this REAL.3M-doing.what-PST=MUT=EMPH REAL.3M-call-USP=MUT	“Oh! What's happened to him, what is he calling for?”	Kwurrirda Kwurrirda-langwa, A3369a Side1 a3.3	present	narrative
anga	bite	iterated achievement	PLUR UBD ACH	n	y	IMPFV	m	x	x	x	Backgr	present	PrMod	enenuwiya V1-∅	possibly a translation issue here…	enenuwiya wurr-akəna wurruwarda nan-anga-Ø n-akəna nenjarrngalya	now COLL-that COLL.dog REAL.COLL>3M-bite-USP 3M-that 3M.boy	‘The dog is biting the boy now’	ST, JRB1-054-01, 00.13.10-00.13.14	present	elicitation (flash card stimuli)
anga	bite	iterated achievement	PLUR UBD ACH	n	y	IMPFV	x	x	x	x	Backgr	present	∅?	V1-∅	possibly a translation issue here…	nənenəngkwarba nəm-anga-Ø=ma muwadha	3M.man REAL.3M>VEG-bite-USP=MUT VEG.dilly.bag	he's biting the dilly bag’	ST, JRB1-057-01, 00.02.26-00.02.47	present	elicitation (translation task)
dhərra	shut; close	accomplishment	Q INCR	closed	y	PFV? IMPFV?	x	x	x	x	Narr? Backgr?	present	∅?	V1-∅	Perfective present?	n-akəna nenəngkwarba nə-dhərrə-Ø=ma akəna door=a	3M-that 3M.man REAL.3M>NEUT-shut-USP=MUT NEUT.that NEUT.door=PF	‘The man closes the door’	JL, JRB1-049-01, 00.31.23-00.31.30	present	elicitation (translation task)
dhərra	shut; close	accomplishment	Q INCR	closed	y	PFV? IMPFV?	x	x	x	x	Narr? Backgr?	present	∅?	V1-∅	Perfective present?	n-akəna nenəngkwarba nə-dhərru-Ø=ma akəna door=a	3M-that 3M.man REAL.3M>NEUT-shut-USP=MUT NEUT.that NEUT.door=PF	‘The man closes the door’	JL, JRB1-049-01, 00.30.49-00.30.59	present	elicitation (translation task)
dhərra	shut; close	accomplishment	Q INCR	closed	y	PFV? IMPFV?	x	x	x	x	Narr? Backgr?	present	∅?	V1-∅	Perfective present?	nə-dhədhə-Ø=ma	REAL.3M>NEUT-shut-USP=MUT	‘He closes the door’	JL, JRB1-049-01, 00.31.33-00.31.36	present	elicitation (translation task)
dhərra	shut; close	accomplishment	Q INCR	closed	y	IMPFV	x	x	hi	g	Backgr	present	AspMod Hab/Iter	arngkababərnama ('all.the.time/many.time') V1-∅		n-akəna nenəngkwarba arngkababərnama nə-dhədhə-Ø=ma door=a	3M-that 3M.man always REAL.3M>NEUT-shut-USP=MUT NEUT.door=PF	‘[He’s] shutting the door’	JL, JRB1-049-01, 00.31.54-00.32.14	present	elicitation (translation task)
dhərra	shut; close	accomplishment	Q INCR	closed max	y	IMPFV	m	x	x	x	Backgr	present	PrMod	adhənuba V1-∅		n-akəna nenəngkwarba adhənuba nə-dhədhə-Ø=ma door=a akəna door=a	3M-that 3M.man today REAL.3M>NEUT-shut-USP=MUT NEUT.door=PF NEUT.that NEUT.door=PF	‘Today the man is shutting the door’	JL, JRB1-049-01, 00.36.03-00.36.16	present	elicitation (translation task)
dhərra	shut; close	accomplishment	Q INCR	closed max	y	IMPFV	x	x	x	x		present	∅?	V1-∅		nə-dhədha-ngu=ma, that's past, nə-dhə-dhu=ma, that's now	3M.REAL-shut-PST=ma 3M.REAL-shut-0=ma		JL, JRB1-049-01, 00.33.03-00.33.10	present	elicitation (translation task)			JL asked ‘nədhəma door=a, it's present or past?’ JL replies ‘present’. JL then asked ‘can it be past as well, or is it always present?’ JL replies ‘always present, I think’ (JL, JRB1-049-01, 00.34.52-00.35.08)
lhəkəraka	build.something	accomplishment	Q INCR	closed max	y	IMPFV	m	x	x	x	Narr	present	PrMod	enenuwiya ('now') V1-∅	Strange rendering. Like a present perfective..	enenu+wiya n-aka nenəngkwarba nə-lhəkəraka-Ø alhəkəra	now+QUANT 3M-this 3M.man REAL.3M>NEUT-build-USP NEUT.house	‘That man builds a house’	JL, JRB1-060-02, 00.00.22-00.00.31	present	elicitation (flash card stimuli)
ngurrkw-arrnga	make.bush.shelter [bush.shelter+cut]	accomplishment	Q INCR	closed max	y	IMPFV	m	x	x	x	Backgr	present	PrMod	adhuwaba V1-∅		adhuwaba n-aka nenəngkwarba nu-ngurrkw-arrnga-Ø amiyerriya	today 3M-that 3M.man REAL.3M-bush.shelter?-cut-USP NEUT.shelter	‘Today he’s making a bush shelter’	JL, JRB1-050-01, 00.26.06-00.26.12	present	elicitation (flash card stimuli)
mebi	sing tr.	accomplishment?	Q INCR	closed max	y	IMPFV	x	x	x	x	Backgr	present	∅?	V1-∅ + Obj		arnkawura n-akəna nenəngkwarba nə-mebu-Ø=ma emeba	one.day 3M-that 3M.man REAL.3M-sing-USP=MUT NEUT.song	‘he [is] singing a song’	JL, JRB1-049-01, 00.27.36-00.28.02	present	elicitation (translation task)			JL: ‘like to me, I heard that man, he was singing, so arnkawura nakəna nenəngkwarba nəmebuma emeba, nəmebuma, he was like sing- he [is] singing, I heard him singing, so nəmebuma, yeah, numebuma, I heard him singing, he was s- I heard him singing a song, so nəmebuma’
dhərra	shut; close	hab accomplishment	STATE HAB	dna	y	IMPFV	x	x	hi	g	Backgr	present	AspMod Hab/Iter	arngkababərnama ('always') V1-∅		arngkababərnama n-akəna nenəngkwarba nə-dhədhə-Ø=ma door=a	always 3M-that 3M.man REAL.3M>NEUT-shut-USP=MUT NEUT.door=PF	‘The man is always shutting the door’	JL, JRB1-049-01, 00.33.27-00.33.35	present	elicitation (translation task)

## Sheet: For copying and pasting (2)
angkarrə	run	activity bounded	CUM BD	dna	n	PFV	x	t	x	p	Narr	past	SoE-PST parataxis	V1-Ø V2-PST akwa V3-PST		y-aka yirrburrbula n-angkarra-Ø m-əkəna [nu?]ma-jama-Ø akəna wall=a akwa [nə?]-nguwanjə-n=dha	MASC-this MASC.ball REAL.MASC-roll-USP VEG-that REAL.VEG-do-PST NEUT.that NEUT.wall= PF and REAL.NEUT(?)-stop-PST=TRM	‘The ball rolled hit the wall and stopped’	ST, JRB1-034-01, 00.16.53-00.17.00	past	elicitation (translation task)
angkarrə	run	activity bounded	CUM BD	dna	y	PFV	x	t	x	c	Narr	past	SoE DiscCon-PST	akwa V1-∅ arakba V2-PST n-ərribərriba		akwa n-angkarra-Ø arakba nu-wurda-nga angwarnda=manja abalkaya=dha	and REAL.3M-run-USP COMPL.ACT REAL.3M-climb-PST NEUT.stone=LOC above=TRM	‘And he ran off (and) climbed high on the rocks’	Chasm Island, A3368a Side1, 00:01:38.930-00:01:43.290	past	narrative
ngərraja	argue.about	activity bounded	CUM MAX	n	y	PFV	x	t	d	p	Narr	past	AspMod.DiscCon-PST SoE	adhənuba=wiya ('after a short time') V0-PST V1-∅ V2(=V1)-∅	Re-iteration/reformulaiton of PST V	adhənuba=wiya wurrəng-alhəkina Wakaba akwa Dangmiyala narrəngi-be-yi-na narra-lhərrakə-ngərraja-Ø, nenənga-ngərraja-Ø Stella n-akəna=lhangwa Nenungwanjirrumiya=lhangwa dhadhingiy-enikba	soon=QUANT 3F.DU-those.two Wakaba and Dangmiyala REAL.3F.DU-argue-RECIP-PST REAL.3F.DU>3A-internal.organs(?)-argue.about-USP REAL.3F.DU>3A-argue.about-USP Stella 3M-that=POSS Nenungwanjirrumiya=POSS 3F.wife-3M.KIN	‘At first Wakaba and Dangmiyala had an argument, they both argued over them two, they argued over Stella the wife of Nenungwanjirrumiya’	Akingambaja-langwa [=About Washing Ceremony], A3370a SIDE1 a5.3	past	narrative
mebi	sing	activity bounded	CUM MAX	dna	y	PFV	x	x	x	x	Narr?	past	∅?	V1-∅	Translation suggests a transitive reading. Rather more like a bounded activity?	n-akəna nenəngkwarba nə-mebu-Ø=ma	3M-that 3M.man REAL.3M-sing-USP=MUT	‘he sang a song’	JL, JRB1-049-01, 00.25.23-00.25.50	past	elicitation (translation task)			JL: ‘he sang a song, nəmebuma, nəmebuma, it's singing. Yeah, that man is singing, yeah nakəna nenəngkwarba nəmebuma, he was singing, yeah, he [is] singing, like he's singing now, nakəna nenəngkwarba nəmebuma’; JL doesn’t like this form as much as others such as nəmebinəma
mebi	sing	activity bounded	CUM MAX	dna	y	PFV	x	x	x	x	Narr?	past	∅?	V1-∅ + Obj		arnkawura n-akəna nenəngkwarba nə-mebu-Ø=ma emeba	one.day 3M-that 3M.man REAL.3M-sing-USP=MUT NEUT.song	‘he sang a song’	JL, JRB1-049-01, 00.27.36-00.28.02	past	elicitation (translation task)			JL: ‘like to me, I heard that man, he was singing, so arnkawura nakəna nenəngkwarba nəmebuma emeba, nəmebuma, he was like sing- he [is] singing, I heard him singing, so nəmebuma, yeah, numebuma, I heard him singing, he was s- I heard him singing a song, so nəmebuma’
angkarrə	run	activity max	CUM MAX	b	y	PFV	x	x	dil	lli	Narr	past	XTD-SoE AspMod	V1-∅:::=wa V2-∅		yingi-rukwulyaka-Ø ying-angkarru-Ø:::=wa, ying-arjiyi-nga akuwabijina awurukwa	REAL.3F-go.around-PST REAL.3F-fly-Ø.XTD=PL REAL.3F-stand-CofS beside NEUT.billabong	‘She flew down and circled round and round (until) she was standing at the edge of the billabong’	GL, A3369a Side1, a3.7 Nimimba-langwa akwa nenikuwenikba-langwa ‘The blind man’	past	narrative
ngərraja	argue.about	activity max	CUM MAX	b	y	PFV	x	tm	d	p	Narr	past	AspMod.DiscCon-IRR.PST SoE parataxis (> DiscCon)	adhənuba ('soon') V-2-IRR-PST(AVERT) V-1-IRR-PST V0-PST V1-∅ V2-PST V3-PST	ongoing argument presented as at once averted and ongoing => unfinished argument?	yakwujine=ka adhənuba ka-wardi-yi-nə=ma wurr-akəna akəna karri-ngirra-ju-wa=ma, narri-ngərrajə-Ø=ma dhambula akəna narr-arriyaka-Ø=ma akəna ne-yama-Ø wurru-wurr-akuwarra ka-wardi-yi-nə=me=ka adhənuba akəna yanda ngawa narra-yangki-yangk-arringa-rna	there=EMPH soon IRR.3A-hit-RECIP-PST=MUT COLL-that NEUT.that IRR.3A-argue.about-CAUS-PST=MUT REAL.3A-argue.about-USP=MUT FEM.feather.string NEUT.that REAL.3A-make.mistake-PST=MUT NEUT.that REAL.3A-say-PST 3A-REDUP-half IRR.3A-hit-RECIP-PST=MUT=EMPH soon NEUT.that only CONT.ACT REAL.3A-REDUP-voice-break-PST	‘Soon they were just about to fight over the feather string, they were arguing over it, they all said some made a mistake and half of the people nearly had a fight but some of the people had stopped them’	Akingambaja-langwa [=About Washing Ceremony], A3370a SIDE1 a5.3	past	narrative
angburadha	get.tired.of(something); become.tired.of(something)	CofS	INCH ATM	b	n	PFV	x	t	x	cc	Narr	past	DiscCon SoE DiscCon-PST	arakba V1-Ø akwa V2-PST V3-Ø ('went V3')		ngalh-aje=ka arakba ying-angburadha-Ø dhərndh-enikba akwa yingə-mungkulha yingə-mungkulhi-nga	3F.PRO-CofR=EMPH COMPL.ACT REAL.3F-get.tired-USP 3F.mother-KIN.3M and REAL.3F-sleep.PST REAL.3F-sleep-CofS	‘His mother got tired of him and went to sleep’	Kwurrirda Kwurrirda-langwa, A3369a Side1 a3.3	past	narrative
enibu-dhə	be.alive; become.alive	CofS	INCH ATM	b	n	PFV	x	x	x	x	Narr	past	SoE parataxis?	V1-∅		n-eniba-dhə-Ø=ma	REAL.3M-alive-INCH-USP=MUT	‘He came back to life’	JL, JRB1-077-01, 00:44:54.310-00:44:57.730	past	elicitation (translation task)
lharrumur-dha	become.dark	CofS	INCH ATM	b	n	PFV	x	m	d	cons	Narr	past	PstMod+AspMod	wurdarriya+wiya ('until morning') V1-∅	possibly lexified INCH?	na-lharrumurdha-Ø nenə-mungkwulha wurdarriya+wiya	REAL.NEUT-dark-PST REAL.3M.DU-sleep.PST morning+QUANT	‘It became dark and they slept until morning’	Bible Society in Australia 1992: 502	past	narrative (text translation)
lharruwura-dha	be.late.afternoon; become.late.afternoon	CofS	INCH ATM	b	n	PFV	x	x	x	c	Narr	past	SoE DiscCon	biya V1-∅	non ambiguous because of biya	biya na-lharruwura-dha-Ø arakba	and.then REAL.NEUT-afternoon-INCH-USP COMPL.ACT	‘It was late afternoon’ [i.e. it had already become late afternoon]	Bible Society in Australia 1992: 174	past	narrative (text translation)
lharruwura-dha	be.late.afternoon; become.late.afternoon	CofS	INCH ATM	b	n	PFV	x	x	x	c	Narr	past	DiscCon SoE	kembirra V1-∅		kembirra na-lharruwura-dha-Ø arakba	then REAL.NEUT-afternoon-INCH-USP COMPL.ACT	‘Afternoon came’ [and then the sun began to set]	Bible Society in Australia 1992: 624	past	narrative (text translation)
wangkwa-dhə	become.old	CofS	INCH ATM	b	n	PFV	x	x	x	x	Narr	past	SoE parataxis?	V1-∅		n-eni-wangkwa-dhə-Ø=ma	REAL.3M-M-man-INCH-USP=MUT	‘He became an old man’ [speaker translation]	JL, JRB1-077-02, 00:03:31.138-00:03:34.828	past	elicitation (translation task)
yakwurra	be.thirsty; get.thirsty	CofS	INCH ATM	b	n	PFV	x	m	x	x	Narr	past	PstMod	V1-∅ alyarrəngwalyilya ('that night')		ni-yakwurra-Ø n-akəna akungwa alyarrəngwalyilya	REAL.3M-be.thirsty-USP 3M-that NEUT.water NEUT.night	‘He got thirsty [for water] during the night’	Stokes n.d.-b: 26	past	elicitation (translation task)
rriya-dha	be.sulky; get.sulky	CofS	INCH ATM	b	n	PFV	x	x	x	c	Narr	past	SoE DiscCon	biya V1-∅	Fore on previous V ; not clear if subject starts sulking then or not	biya enamba=lhangwa Arrama ni-lyangi-rriya-dha-Ø	and.then 3M.PRO.SEQ=POSS Arrama REAL.3M-head-bad-INCH-USP	‘Then it was Arrama's turn, he was sulky’	Akingambaja-langwa [=About Washing Ceremony], A3370a SIDE1 a5.3	past	narrative
walyuwu	be.cooked; get.cooked; be.ripe; get.ripe	CofS/state	INCH ATM	closed max	n	PFV	x	x	x	c	Narr	past	DiscCon+XTD SoE	bi:::ya V1-∅		bi:::ya nu-walyuwu-Ø-manji=kba=dha, y-akina yimarndakuwaba y-inumalye=ka=dangba	and.then.TXD REAL.3M-be.cooked-USP=LOC=DENIZ=TRM MASC-that MASC.blue.tonged.lizard MASC-good?=EMPH=EMPH	‘When at last that blue-tongued lizard was cooked to perfection, it was the fattiest, juiciest blue-tongued lizard that ever was’	Kwurrirda Kwurrirda-langwa, A3369a Side1 a3.3	past	narrative
enibu-dhə	be.alive; become.alive	CofS/state	INCH ATM	b	n	PERF	x	x	x	cr	Perf context	past>present	PerfMod Matrix-∅(PERF) >> ObjCl	arakba V0-∅ >> V1-∅ ('now' + result)	you have seen that I have become alive again'	yirrə-rrəngka-Ø=ma arakba ngayuwa nəng-enibu-dhə-Ø=ma amandhangwa nəngi-jungwu-Ø=mərra=dha	REAL.2A-see-PST=MUT COMPL.ACT 1.PRO REAL.1-alive-INCH-USP=MUT true REAL.1-die-USP=MUT=TRM	‘Now you have seen that I really am alive again [it’s true that I died before]’	Bible Society in Australia 1992: 890	present	narrative (text translation)
angkarrə	run	inchoative activity = achievement	INCH ATM	dna	y	PFV	x	t	x	c	BackFore	past	PstMod + Overlap-PST SoE DiscCon	yarrungkwa V-2-PST V-1-PST V0-PST biya V1-∅	Fore on 'run'	yarrungkwa n-akən ni-yukwujiya na-rrak-ajey=m akwa nəm-arr-abərrəngka-Ø=ma m-arrakwəyabe-nə=ma maməwura biya wurr-akən wurruwarda nəw-angkarrə-Ø=m enəwa=wa	yesterday 3M-that 3M-small REAL.3M-forehead-stand.PST=MUT and REAL.3M>VEG-REDUP-look-PST=MUT REAL.VEG?-rise-PST=MUT VEG.sun and.then COLL-that COLL.dog REAL.COLL-run-USP=MUT 3M.PRO=ALL	‘Yesterday the boy was sitting and watching the sun rise, and then the dog ran up to him’	ST, JRB1-034-01, 00.04.17-00.04.27	past	elicitation (translation task)
angkarrə	run	inchoative activity = achievement	INCH ATM	dna	y	PFV	x	t	x	c	BackFore	past	Overlap-PST SoE DiscCon	V0-PST akena V1-Ø	Back on 1st V	nu-ngurrkwa-rnə=ma yiburadh=uwa akena n-angkarra-Ø	REAL.3M>MASC-hunt-PST=MUT MASC.wallaby=ALL but REAL.MASC-run-USP	‘[The man] was hunting the wallaby, but it ran away’	ST, JRB1-034-01, 00.06.53-00.07.01	past	elicitation (translation task)
angkarrə	run	inchoative activity = achievement	INCH ATM	b	y	PFV	x	x	x	p	Narr	past	SoE-RED parataxis	V0-RED-∅ V1-∅		na-lhawu-lhawurradh-Ø, nuw-angkarra-Ø	REAL.NEUT-REDUP-return-USP REAL.NEUT-run-USP	‘It [the mother cat] kept going back, it ran off’	GL, A3369a Side 1 a3.4, Bujikeda ‘Mother cat’, 00.07.28-00.07.32	past	narrative
engkərrka	think; listen	inchoative activity = achievement	INCH ATM	n	y	PFV	x	t	x	c	Narr	past	SoE-PST DiscCon	V0-PST akwa V1-∅		ngayuwa ng-arda-ngu-ma James=wa akwa n-engkərrka-Ø	1.PRO REAL.1-call.out-PST=MUT James=ALL akwa REAL.3M-listen-USP	‘I called out to James, and he listened’	ST, JRB1-054-01, 00.23.45-00.24.05	past	elicitation (translation task)			(in response to ‘could we also say nakəna James-a ningkərrka? [enenuwiya]’ where ST replies ‘no, no, if I was calling out to you I'd use that sentence, ngayuwa ngardanguma James-wa akwa nengkərrka’)
lhəka	go	inchoative activity = achievement	INCH ATM	n	y	PFV	x	t>>	x	p	Narr	past	SoE DiscCon >> IRR.PST	V1-Ø V2-CofS-Ø akwa V3-Ø akwa V4-Ø >> V5-IRR-PST	Is V1 V2 a case of SVC?	n-akən nanəngkwarba nə-lhəka-Ø=ma n-ambarr-nga=ma akən-manja chair=a akwa nə-mədhilyakbə-Ø-ma akwa kamba nə-kw-aji-nga=ma kənə-lhəka-nə=ma	3M-that 3M.man REAL.3M-go-USP=MUT REAL.3M-sit-CofS=MUT NEUT.that=LOC chair=PF and REAL.3M-cough-USP=MUT and then REAL.3M-half(?)-be.upright-CofS=MUT IRR.3M-go-PST=MUT	‘he stood up and walked away’	ST, JRB1-037-01, 00:31:11-00:31:21	past	elicitation (video stimuli)
ngwurrukbalija	open(something)	accomplishment	PLUR BD ACC	dna	y	PFV	x	t	i	cit	Narr	past	IterPred SoE DiscCon-PST	n-ərribərriba ('3M.keep.on') V1-∅ akena V2-PST		n-aka nanəngkwarba n-ərribərriba nu-ngwurrubalija-Ø=m akən door=a akena ni-kamadhə-nə=ma	3M-that 3M.man 3M-keep.on REAL.3M>NEUT-open-USP=MUT NEUT.that NEUT.door=PF then REAL.3M-feel.upset-PST-MUT	‘The man kept on opening the fridge and felt sad’	ST, JRB1-037-02, 00:11:48-00:12:02	past	elicitation (video stimuli)
ngwurrukbalija	open(something)	accomplishment	PLUR BD ACC	dna	y	PFV	x	t	ilr	cit	Narr	past	Matrix-PST >> ObjCl-∅ SoE DiscCon-PST	kamb arakba V-1-XTD-PST biya V0-XTD-PST >> V1-∅ akena V2-PST	akena here = but	kamb arakba ni-yen-jama:::-Ø biya n-aka nanungkwarba neni-bəkədha ni-yen-jama-Ø nungurru- ni-ngiyandha-ngu nu-ngurrbalija-Ø-m akən door akena ni-karradhu-nə=ma	then COMPL.ACT REAL.3M-REDUP-do.XTD-PST and.then 3M.that 3M.man 3M-crazy REAL.3M-REDUP-do.XTD-PST REAL.3M-want-PST REAL.3M>NEUT-open-USP=MUT NEUT.that NEUT.door but 3M-unable.to.do(?)-PST=MUT	‘The man kept on trying to open the fridge door, he was a crazy man, but he wasn’t able to’	ST, JRB1-037-02, 00:12:21-00:12:40	past	elicitation (video stimuli)
ngərandha	cut.up	iterated accomplishment	PLUR BD ACC	n	y	PFV	x	tm	x	it	Narr	past	PstMod + IterPred	yarrungkwa V1-∅ n-ərribərriba ('keep on')		n-aka nənəngkwarba yarrungkwa nə-ngərandha-Ø=m akən bread=a n-ərribərriba	3M-that 3M.man yesterday REAL.3M>NEUT-cut.up-USP=MUT NEUT.that NEUT.bread=PF 3M-keep.on	‘Yesterday the man kept on cutting up the bread’	ST, JRB1-038-01, 00:04:17-00:04:25	past	elicitation (video stimuli)
marrakaja	grab; take	iterated achievement	PLUR BD ACC	dna	y	PFV	x	t	di	c	Narr	past	AspMod SoE DiscCon-PST	keep.on ngawa (CONT) V-1-∅ angkəbəbərnama ('all day') ankgwabəbənama V0-PST biya V1-∅ keep.on V2-PST ngewa		dh-akən dhədharrəngka dhə-rribərrib ngəw ying-merrəmaja-Ø=ma-m a-md-akən dhumbala angkəbəbərnama biya n-akən nanəngkwarba ankgwabəbənama nu-wilyaka-Ø=m ayika biya dh akən dhədharra yingi-na-marrakaja-Ø=m dh-ərribərrib a-mdh-akən ayik=dha yengi-yenja-Ø=m ngəwa=dha	3F-that 3F.woman 3F-keep.on CONT.ACT REAL.3F-hang.out-USP=MUT-? NEUT-many-that FEM.clothes all.day and.then 3M-that 3M.man all.day REAL.3M-carry-PST=MUT NEUT.tree and.then 3F-that 3F.woman REAL.3F-3M-grab-USP=MUT 3F-keep.on NEUT-many-that NEUT.tree=TRM 3F-do-PST=MUT CONT.ACT=TRM	‘The woman kept on hanging out the clothes all day, and then the man took the stick and the woman grabbed it’	ST, JRB1-037-02, 00:17:13-00:17:31	past	elicitation (video stimuli)
marerrəmaja	hang.out(something)	iterated accomplishment	PLUR BD ACC?	n	y	PFV	x	t	di	cc	Narr	past	AspMod + SoE DiscCon-PST	dhə-rribərrib ngəw 1-Ø biya V2-PST biya V3-Ø		dh-akən dhədharrəngka dhə-rribərrib ngəw ying-merrəmaja-Ø=ma-m a-md-akən dhumbala angkəbəbərnama biya n-akən nanəngkwarba ankgwabəbənama nu-wilyaka-Ø=m ayika biya dh akən dhədharra yingi-na-marrakaja-Ø=m dh-ərribərrib a-mdh-akən ayik=dha yengi-yenja-Ø=m ngəwa=dha	3F-that 3F.woman 3F-keep.on CONT.ACT REAL.3F-hang.out-USP=MUT-? NEUT-many-that FEM.clothes all.day and.then 3M-that 3M.man all.day REAL.3M-carry-PST=MUT NEUT.tree and.then 3F-that 3F.woman REAL.3F-3M-grab-USP=MUT 3F-keep.on NEUT-many-that NEUT.tree=TRM 3F-do-PST=MUT CONT.ACT=TRM	‘The woman kept on hanging out the clothes all day, and then the man took the stick and the woman grabbed it’	ST, JRB1-037-02, 00:17:13-00:17:31	past	elicitation (video stimuli)
lhəka	go	iterated achievement	PLUR BD ACH	dna	y	PFV	x	x	hi	x	Narr	past	AspMod	angkawura ('all.the.time') angkwababərna ('every day') V1-Ø	corrected glosses for angkawura + angkwababərna	angkawura angkwababərna nə-lhəka-Ø en=lhang=wa angalya	all.the.time always REAL.3M-go-USP 3M.PRO=POSS=ALL NEUT.place	‘he went to his house several times’	JL, JRB1-049-01, 00.09.25-00.09.34	past	elicitation (translation task)
adhərrə	spear; pierce	iterated achievement	PLUR BD ACH	dna	y	PFV	x	x	il	it lli	Narr	past	AspMod-PST XTD SoE DiscCon-PST	ngaw V0-RED-PST XTD-V1-∅ ekena V1-∅ kemba NEG V2-IRR-PST		ni-yen-jem-Ø ngaw n-a:::dhərra-Ø=m akən jurra ekena ne-jerrədhə-Ø=m akən jurr- jurra kemba nara=b kən-adhərre-na	REAL.3M-REDUP-do-PST CONT.ACT REAL.3M>NEUT-XTD.spear-USP=MUT NEUT.that NEUT.paper but REAL.3M-be.finished-USP=MUT NEUT.that NEUT.paper NEUT.paper then NEG=EMPH IRR.3M>NEUT-spear-PST	‘He kept on piercing the paper bag, but then he finished, then he didn’t pierce [it] anymore’	ST, JRB1-037-01, 00:25:09-00:25:18	past	elicitation (video stimuli)
lhəka	go	iterated achievement	PLUR BD ACH	dna	n	PFV	x	x	x	it	Narr	past	SoE parataxis?	ngaringka V1-∅ V1-∅		ngaringka yingə-lhəka-Ø yingə-lhəka-Ø	again REAL.3F-go-USP REAL.3F-go-USP	‘She kept on going’	Stokes 1971: 31	past	elicitation (translation task)
dhakba-jangu	grind; knock [+REFL]	activity bounded	PLUR BD ACT BD	n	y	PFV	x	t	x	c	Narr	past	SoE DiscCon	V0-PST akwa V1-Ø		nu-ruki+lyaka-ja-Ø=ma akwa nə-dhakba-jang-Ø=ma	REAL.3m>NEUT-stir-CAUS-USP=MUT and REAL.3M-grind-REFL-USP=MUT	‘he stirred and ground up [the food]’	ST, JRB1-029-03, 00.27.28-00.27.34	past	elicitation (video stimuli)
ruk+wulyaka-ja	stir; spin; turn.around	activity bounded	PLUR BD ACT BD	n	y	PFV	x	x	x	c	Narr	past	SoE DiscCon	V1-Ø akwa V2-Ø	could be durative perfective	nu-ruki+lyaka-ja-Ø=ma akwa nə-dhakba-jang-Ø=ma	REAL.3m>NEUT-stir-CAUS-USP=MUT and REAL.3M-grind-REFL-USP=MUT	‘he stirred and ground up [the food]’	ST, JRB1-029-03, 00.27.28-00.27.34	past	elicitation (video stimuli)
ruk+wulyaka-ja	stir; spin; turn.around	activity bounded	PLUR BD ACT BD	n	y	PFV	x	t	x	c	Narr	past	SoE DiscCon-PST	V1-Ø akwa V2-PST		n-aka nenəngkwarba nə-ruk+wulyaka-ja-Ø=ma, nu-rək+wulyaka-ja-Ø anhənga akwa n-errəngala-ng=ma	3M-this 3M.man REAL.3M>NEUT-stir-CAUS-USP=MUT REAL.3M>NEUT-stir-CAUS-USP NEUT.food and REAL.3M-itch-PST=MUT	‘The man stirred the food and ate it’	CW, JRB1-023-01, 00.24.42-00.25.06	past	elicitation (video stimuli)
ruk+wulyaka-ja	stir; spin; turn.around	activity bounded	PLUR BD ACT BD	n	y	PFV	x	t	x	c	Narr	past	SoE DiscCon-PST	V1-Ø akwa V2-PST		n-aka nenəngkwarba nə-ruk+wəlyaka-ja-Ø=ma anhənga akwa n-alyba-rnə=ma	3M-this 3M.man REAL.3M>NEUT-stir-CAUS-USP=MUT NEUT.food and REAL.3M-eat-PST=MUT	‘The man stirred the food and ate it’	CW, JRB1-023-01, 00.29.36-00.30.02	past	elicitation (video stimuli)
ruk+wulyaka-ja	stir; spin; turn.around	activity bounded	PLUR BD ACT BD	n	y	PFV	x	t	x	c	Narr	past	SoE DiscCon-PST	V1-Ø akwa V2-PST		n-akəna ni-yuwkujiya nəmə-rək+wulyaka-ja-Ø-ma… akwa n-andhey=ma	3M-that 3M.small REAL.3M>VEG-stir-CAUS-USP=MUT… and REAL.3M-look.PST=MUT	‘The boy turned [the wheel] around and looked out [of the binoculars]’	JL, JRB1-023-01, 00.36.30-00.36.58	past	elicitation (video stimuli)
njurrkwa-ja	move	bounded iterated activity	PLUR BD ACT BD	n	y	PFV-Weak	x	m	x	c	Narr	past	PstMod + SoE DiscCon	arakbəwiya V0-Ø akwa V1-Ø	PC - weak perfective	arakbəwiya n-aka nenəngkwarba nu-njurr-kwa-ja-Ø=ma akəna fridge=a ekena engkəbərrungwərrungwa or kamba ngə-nekibulu-Ø=m akəna	long.ago 3M-this 3M.man REAL.3M>NEUT-move-CAUS-USP=MUT NEUT.that NEUT.fridge=PF but NEUT.heavy then REAL.3M>NEUT(?)-give.up(?)-USP=MUT NEUT.that	‘Long time ago the man [tried to] move the fridge, but it was too heavy’ or ‘and so he gave up’	JL, JRB1-038-01, 00:13:47-00:14:06	past	elicitation (video stimuli)		frustrative
lhawurradhə	return	bounded iteration of achievement	PLUR MAX ACT	dna	y	PFV	x	x	x	pit	Narr	past	SoE-RED parataxis	V1-RED-∅ V2-∅		na-lhawu-lhawurradh-Ø, nuw-angkarra-Ø	REAL.NEUT-REDUP-return-USP REAL.NEUT-run-USP	‘It [the mother cat] kept going back, it ran off’	GL, A3369a Side 1 a3.4, Bujikeda ‘Mother cat’, 00.07.28-00.07.32	past	narrative
lyangk+wama-ja	blink	semelfactive	SEM ATM	b	y	PFV	x	x	x	x	Narr	past	∅	V1-Ø		n-aka nenəngkwarba nəma-lyangk+wama-ja-Ø-ma	3M-this 3M.man REAL.3M<VEG-head+nod-CAUS-USP=MUT	‘He blinked [his eye]’	CW, JRB1-023-01, 00.13.32-00.13.40	past	elicitation (video stimuli)
lyangk+wama-ja	blink	semelfactive	SEM ATM	b	y	PFV	x	x	x	x	Narr	past	∅	V1-Ø		nəma-lyangk+wəma-ja-Ø-ma	REAL.3M<VEG-head+nod-CAUS-USP=MUT	‘He blinked [his eye]’	JL, JRB1-023-01, 00.13.44-00.13.46	past	elicitation (video stimuli)
lyangk+wama-ja	blink	semelfactive	SEM ATM or PLUR SEM BD	b	y	PFV	x	m	x	x	Narr	past	PstMod	yarrungkwa V1-Ø		yarrungkwa n-akəna nenəngkwarba numa-lyangk+wama-ja-Ø-ma menba	yesterday 3M-that 3M.man REAL.3M<VEG-head+nod-CAUS-USP=MUT VEG.eye	‘Yesterday the man blinked his eye’	JL, JRB1-023-01, 00.15.54-00.16.12	past	elicitation (video stimuli)
mədhilyakbə	cough	semelfactive	SEMELF BD	dna	n	PFV	x	t	x	cc	Narr	past	SoE DiscCon-IRR.PST	V-2-∅ akwa V-1-∅ akwa kamba V0-∅ V1-∅ V2-IRR-PST	CofS affix +-∅ or did you change your mind? Anin texts is rather: 'he came and sat down, sneezed, then stood up and walked away'	n-akən nanəngkwarba nə-lhəka-Ø=ma n-ambarr-nga=ma akən-manja chair=a akwa nə-mədhilyakbə-Ø-ma akwa kamba nə-kw-aji-nga=ma kənə-lhəka-nə=ma	3M-that 3M.man REAL.3M-go-USP=MUT REAL.3M-sit-CofS=MUT NEUT.that=LOC chair=PF and REAL.3M-cough-USP=MUT and then REAL.3M-half(?)-be.upright-CofS=MUT IRR.3M-go-PST=MUT	‘he stood up, coughed, and walked away’	ST, JRB1-037-01, 00:31:11-00:31:21	past	elicitation (video stimuli)

## Sheet: Old Gl sheet - do not use !!
Verb root	Verb root gloss	Aktionsart	Complexity	Scalarity	Control	Viewpoint	Overt presext ix clause	Overt Past tn complex clause / clause chatn	Asp quantif	Temporal succession	Structural context	Example temporal reading	TA context	Overt TA pattern		Example	Example gloss	Example translation	Example source	Example temporal reading	Genre type of example	REAL-V-USP in construction in example?	Modal reading (if relevant)?	Other notes
ngurrkwa	hunt	activity	CUM	n	y	IMPFV	x	x	h	x	Narr? Backgr?	past	∅? Hab?	V1-Ø	Impossible to judge out of context	nu-ngurrkwa-Ø=m yimendhə=wa	REAL.3M-hunt-USP=MUT MASC.turtle=ALL	‘He hunted turtles’	CW, JRB1-001-01, 00.04.56-00.04.58	past	elicitation (translation task)
angurrkwuru-da	curve; bend; go.around.corner	achievement	ATM	b	y	PFV	x	x	x	c	Narr	past	LocMod	yadəkəna ('from there') V1-Ø		yadəkəna ngalh-aja n-angurrkwuru-da-Ø angamba biya alyuwangmanja	from.there NEUT.PRO-CofR REAL.NEUT-corner-INCH-USP where and.then place.name	‘from there, they went around the corner, and there that place is Alyuwangmanja’	MM, JRB1-005-01, 00.00.58-00.01.03	past	narrative
ararurrmaja	dry(something)	hab accomplishment	CUM	n	y	IMPFV	x	t	h	g	Backgr	past	Overlap-PST RED (Hab)	V0-PST RED-V1-Ø		yirra-rrbə-rrəngka-Ø=ma na-yan-jamarrka-Ø=ma yakwujina adhalyəma=manja narrəma-mərndak-ajirra-ngə=ma dhəmbalha-mərriya narrəma-mərndak-ara-rurrmaja-Ø=ma karrawara amarda-mirriya=manja	REAL.1A>3A-REDUP-see-PST=MUT REAL.3A-REDUP-how.to.do-PST=MUT there NEUT.river=LOC REAL.3A>VEG-many-wash-PST=MUT VEG.clothes-the.rest REAL.3A>VEG-many-REDUP-dry-USP=MUT above NEUT.grass-the.rest=LOC	‘We used to watch older women at the river wash their clothes and dry [them] on dry grasses’	JL, JRB1-007-01, 00.00.56-00.01.09	past	narrative
yedha	arrive	achievement	ATM PREP	b	y	PFV	x	t	x	x	Narr	past	PstMod	yarrungkwa V1-Ø		yarrungkwa n-akəna nenəngkwarba ni-yadhə-Ø=ma	yesterday 3M-that 3M.man REAL.3M-arrive-USP=MUT	‘He arrived yesterday’	JL, JRB1-018-01, 00.02.59-00.03.08	past	elicitation (translation task)
yedha	arrive	achievement	ATM PREP	b	y	PFV	x	x	x	x	Narr	past	∅	V1-Ø		n-akən nenəngkwarba ni-yadhə-Ø=ma Numbulwaru=manja	3M-that 3M.man REAL.3M-arrive-USP=MUT place.name=LOC	‘He arrived at Numbulwar’	JL, JRB1-018-01, 00.03.32-00.03.36	past	elicitation (translation task)
alyadhə	hang	state	CUM	n	n?	IMPFV	x	x	x	x	Backgr	present	∅	V1-Ø		n-aka nenəngkwarba n-alyadhə-Ø=ma	3M-this 3M.man REAL.3M-hang-USP=MUT	‘he['s] just hanging’	JL, JRB1-022-01, 00.03.53-00.04.00	present	elicitation (video stimuli)
alyadhə	hang	state	CUM	n	n?	IMPFV	x	x	x	x	Backgr	present	∅	V1-Ø		n-alyadhə-Ø=ma	REAL.3M-hang-USP=MUT	‘[he’s] hanging’	JL, JRB1-022-01, 00.04.18-00.04.23	present	elicitation (video stimuli)
alyadhə	hang	state	CUM	n	n?	IMPFV	x	m	x	x	Backgr	past	PstMod	V1-Ø		n-alyadhə-Ø=ma	REAL.3M-hang-USP=MUT	‘he hung’ (in response to prompt ‘so if we say yarrungkwa nakəna nenəngkwarba...’)	JL, JRB1-022-01, 00:04:18-00:04:20	past	elicitation (video stimuli)
ngwədhangma	be.open	state	CUM	n	n	IMPFV	x	x	x	x	Backgr	present	∅	V1-Ø		na-ngwədhangma-Ø	REAL.NEUT-be.open-USP	‘the door is open’	JL, JRB1-023-01, 00.02.10-00.02.16	present	elicitation (video stimuli)
ngwədhangma	be.open	state	CUM	n	n	IMPFV	x	t	x	c	BackFore+TempShift	present	TempShift DiscCon-PST	V1-Ø akwa V2-PST	temporal switch!	akəna door-a na-ngwudhangma-Ø akwa na-dhəka-jungu-nə-ma	NEUT.that NEUT.door REAL.NEUT-be.open-USP and REAL.NEUT-be.closed-REFL-PST=MUT	‘the door is open, and then it got shut’	JL, JRB1-023-01, 00.01.54-00.02.02	present	elicitation (video stimuli)
lyangk+wama-ja	blink	semelfactive	ATM	b	y	PFV	x	x	x	x	Narr	past	∅	V1-Ø		n-aka nenəngkwarba nəma-lyangk+wama-ja-Ø-ma	3M-this 3M.man REAL.3M<VEG-head+nod-CAUS-USP=MUT	‘He blinked [his eye]’	CW, JRB1-023-01, 00.13.32-00.13.40	past	elicitation (video stimuli)
lyangk+wama-ja	blink	semelfactive	ATM	b	y	PFV	x	x	x	x	Narr	past	∅	V1-Ø		nəma-lyangk+wəma-ja-Ø-ma	REAL.3M<VEG-head+nod-CAUS-USP=MUT	‘He blinked [his eye]’	JL, JRB1-023-01, 00.13.44-00.13.46	past	elicitation (video stimuli)
lyangk+wama-ja	blink	semelfactive	ATM or PLUR ACT BD	b	y	PFV	x	m	x	x	Narr	past	PstMod	yarrungkwa V1-Ø		yarrungkwa n-akəna nenəngkwarba numa-lyangk+wama-ja-Ø-ma menba	yesterday 3M-that 3M.man REAL.3M<VEG-head+nod-CAUS-USP=MUT VEG.eye	‘Yesterday the man blinked his eye’	JL, JRB1-023-01, 00.15.54-00.16.12	past	elicitation (video stimuli)
bulwanda	bend.down	accomplishment	I INCR	closed max	y	IMPF	x	t	x	x	Backgr	present	∅	V1-Ø		ne-bulwanda-Ø=ma	REAL.3M-bend.down-USP=MUT	‘[he’s] bending down’	JL, JRB1-023-01, 00.35.26-00.35.32	present	elicitation (video stimuli)
ruk+wulyaka-ja	stir; spin; turn.around	activity bounded	PLUR ACT BD	n	y	PFV	x	t	x	c	Narr	past	SoE DiscCon-PST	V1-Ø akwa V2-PST		n-aka nenəngkwarba nə-ruk+wulyaka-ja-Ø=ma, nu-rək+wulyaka-ja-Ø anhənga akwa n-errəngala-ng=ma	3M-this 3M.man REAL.3M>NEUT-stir-CAUS-USP=MUT REAL.3M>NEUT-stir-CAUS-USP NEUT.food and REAL.3M-itch-PST=MUT	‘The man stirred the food and ate it’	CW, JRB1-023-01, 00.24.42-00.25.06	past	elicitation (video stimuli)
ruk+wulyaka-ja	stir; spin; turn.around	activity bounded	PLUR ACT BD	n	y	PFV	x	t	x	c	Narr	past	SoE DiscCon-PST	V1-Ø akwa V2-PST		n-aka nenəngkwarba nə-ruk+wəlyaka-ja-Ø=ma anhənga akwa n-alyba-rnə=ma	3M-this 3M.man REAL.3M>NEUT-stir-CAUS-USP=MUT NEUT.food and REAL.3M-eat-PST=MUT	‘The man stirred the food and ate it’	CW, JRB1-023-01, 00.29.36-00.30.02	past	elicitation (video stimuli)
ruk+wulyaka-ja	stir; spin; turn.around	activity bounded	PLUR ACT BD	n	y	PFV	x	t	x	c	Narr	past	SoE DiscCon-PST	V1-Ø akwa V2-PST		n-akəna ni-yuwkujiya nəmə-rək+wulyaka-ja-Ø-ma… akwa n-andhey=ma	3M-that 3M.small REAL.3M>VEG-stir-CAUS-USP=MUT… and REAL.3M-look.PST=MUT	‘The boy turned [the wheel] around and looked out [of the binoculars]’	JL, JRB1-023-01, 00.36.30-00.36.58	past	elicitation (video stimuli)
ruk+wulyaka-ja	stir; spin; turn.around	activity	PLUR ACT	n	y	PFV? IMPFV?	x	m	x	x	Narr? Backgr?	past	PstMod	yarrungkwa V1-Ø		yarrungkwa n-akəna ni-yuwkujiya nə-ruk+wulyaka-ja-Ø-ma	yesterday 3M-that 3M.small REAL.3M>NEUT-stir-CAUS-USP=MUT	‘Yesterday the boy turned [the wheel] around’	JL, JRB1-023-01, 00.37.20-00.37.28	past	elicitation (video stimuli)
ruk+wulyaka-ja	stir; spin; turn.around	activity	PLUR ACT	n	y	PFV? IMPFV?	x	m	x	x	Narr? Backgr?	past	PstMod	yarrungkwa V1-Ø		yarrungkwa n-akəna niyukwujiya nəmə-ruk+wulyaka-ja-Ø=ma mijiyanga	yesterday 3M-that 3M.small REAL.3M>VEG-stir-CAUS-USP=MUT VEG.boat	‘Yesterday the boy turned the [wheel of the] boat around’	JL, JRB1-024-01, 00.07.44-00.07.58	past	elicitation (video stimuli)
kw+arrangə	cut	accomplishment	Q INCR	closed max	y	PFV	x	m	x	x	Narr	past	PstMod	yarrungkwa V1-Ø	probably not an achievement	yarrungkwa n-akəna nenəngkwarba nu-kw+arrangu-Ø=ma amamərerra ayika	yesterday 3M-that 3M.man REAL.3M>NEUT-half+cut-USP=MUT NEUT.branch NEUT.tree	‘The man cut the branch of a tree’	JL, JRB1-024-01, 00.23.12-00.23.34	past	elicitation (video stimuli)
kw+arrangə	cut	achievement	ATM	b	y	PFV	x	m	x	x	BackFore	past	PstMod	yarrungkwa V1-Ø	Backgr on 'holding'	yarrungkwa n-akəna nenəngkwarba nu-wilyaka-Ø=ma a-ki-ngkarrnga en=lhang=manja ayerrka akəna a-ki-ngkarrnga akwa nu-kw+arrangu-Ø=ma amamərarra	yesterday 3M-that 3M.man REAL.3M>NEUT-hold-PST=MUT NEUT-NSR-cut 3M.POSS=LOC NEUT.hand NEUT.that NEUT-NSR-cut and REAL.3M>NEUT-half+cut-USP=MUT NEUT.stick	‘Yesterday the man was holding the knife in his hand and cut the stick’	JL, JRB1-029-01, 00.02.40-00.03.16	past	elicitation (video stimuli)
kw+arrangə	cut	achievement	ATM	b	y	PFV	x	m	x	x	Narr	past	PstMod	yarrungkwa V1-Ø		yarrungkwa n-akəna nenəngkwarba nu-kw+arrangu-Ø=ma amamərarra eyika en=lhangə-ma alhəka	yesterday 3M-that 3M.man REAL.3M>NEUT-half+cut-USP=MUT NEUT.stick NEUT.tree 3M.PRO=POSS=INST NEUT.foot	‘Yesterday the man cut the stick with his foot’	JL, JRB1-029-01, 00.04.18-00.04.37	past	elicitation (video stimuli)
kw+arrangə	cut	achievement	ATM	b	y	PFV	x	m	x	x	Narr	past	PstMod	yarrungkwa V1-Ø		yarrungkwa n-aka nenəngkwarba nu-kw+arrangu-Ø=ma akəna amamərarra ayika en=lhangə=ma alhəka	yesterday 3M-that 3M.man REAL.3M>NEUT-half+cut-USP=MUT NEUT.that NEUT.stick NEUT.tree 3M.PRO=POSS=INST NEUT.foot	‘Yesterday the man cut the stick with his foot’	JL, JRB1-029-01, 00.07.11-00.07.18	past	elicitation (video stimuli)
ngk+arrangə	cut	achievement	ATM	b	y	PFV	x	m	x	x	Narr	past	PstMod	yarrungkwa V1-Ø		yarrungkwa n-aka nenəngkwarba ni-ngk+arrənga-Ø nu-kw+arrangu-Ø-ma ni-ngk+arrnga-rnu-ma ene=lhangwa	yesterday 3M-that 3M.man REAL.3M>NEUT-?+cut-USP REAL.3M>NEUT-?+cut-USP=MUT REAL.3M>NEUT-?+cut-USP=MUT 3M.PRO=POSS	‘Yesterday the man cut [the stick with] his foot’	JL, JRB1-029-01, 00.08.01-00.08.23	past	elicitation (video stimuli)
eburrəwendi-ja	cover.something	accomplishment/state	Q INCR/CUM	closed max/n	y	IMPFV	x	x	x	c	Backgr	past	DiscCon SoE	kemba V1-Ø	translation is a bit strange given 'kemba'	kemba n-eburrəwendhi-ja-Ø-ma jurra=ma	then REAL.3M>NEUT-cover-CAUS-USP=MUT NEUT.paper=INST	‘he was covering that knife with the brown paper’ (strange translation given 'kemba'; looks more like 'then he covered')	JL, JRB1-029-03, 00.04.13-00.04.18	past	elicitation (video stimuli)
wərumbi-ja	cover.something	accomplishment	Q INCR	closed max	y	PFV	x	tm	x	c	Narr	past	PstMod SoE-PST DiscCon	yarrungkwa V0-PST akwa V1-Ø		yarrungkwa n-aka nenəngkwarba nə-lyinga-Ø=ma akəna lyelyinga en=lhang=manja ayerrka akwa nu-wərumbi-ja-Ø=ma akəna lyelyinga jurra=ma	yesterday 3M-this 3M.man REAL.3M>NEUT-hold-PST=MUT NEUT.that NEUT.knife 3m.PRO=POSS=LOC NEUT.hand and REAL.3M-cover-CAUS-USP=MUT NEUT.that NEUT.knife NEUT.paper=INST	‘Yesterday the man held the knife in his hand and covered it with the paper’	JL, JRB1-029-03, 00.05.38-00.06.07	past	elicitation (video stimuli)
adhərrə	spear; pierce	achievement	ATM	b	y	PFV	x	x	x	c	Narr	past	SoE DiscCon	POSS akena V0-∅ biya V1-∅		en=lhang=manja ayerrka akena n-andheya biya n-adharrə-Ø=ma jurra=manja	3M.PRO=POSS=LOC NEUT.hand but 3M-look.around.PST and.then REAL.3M>NEUT-spear-USP=MUT NEUT.book=LOC	‘[he was holding the knife] in his hand, he looked around and then he speared the paper’	JL, JRB1-029-03, 00.07.34-00.07.48	past	elicitation (video stimuli)
adhərrə	spear; pierce	achievement	ATM	b	y	PFV	x	t	x	c	BackFore	past	SoE-PST DiscCon-PST	yarrungkwa V0-PST akwa V1-Ø	Backgr on 1s V 'holding'	yarrungkwa maməwəra=manja n-aka nenəngkwarba nu-wilyaka-Ø=ma lyelyinga akwa n-adharra-Ø jurru=manja	yesterday VEG.day=LOC 3M-this 3M.man REAL.3M>NEUT-hold-PST=MUT NEUT.knife and REAL.3M>NEUT-spear-USP NEUT.paper=LOC	‘yesterday morning the man was holding a knife and speared the paper’	JL, JRB1-029-03, 00.08.53-00.09.09	past	elicitation (video stimuli)
adhərrə	spear; pierce	achievement	ATM	b	y	PFV	x	t	x	c	BackFore	past	SoE-PST DiscCon	V0-PST akwa V1	Backgr on 'holding'	ni-lyinga-Ø=ma akəna lyelyinga en=lhang=manja ayerrka akwa n-adharra-Ø jurra=manja	REAL.3M>NEUT-hold-PST=MUT but NEUT.knife 3M.PRO=POSS=LOC NEUT.hand and REAL.3M>NEUT-spear-USP paper=LOC	‘he was holding the knife in his hand and speared the paper’	JL, JRB1-029-03, 00.09.27-00.09.33	past	elicitation (video stimuli)
errikbə	throw	achievement	ATM	b	y	PFV	x	x	x	x	Narr	past	SoE DiscCon	V0 akwa V1		n-aka nenəngkwarba nəmə-wilyaka-Ø=ma malarra ayerrk=manja akwa n-errikba-Ø, n-errikbu-Ø=ma	3M.this 3M.man REAL.3M>VEG-hold-PST=MUT VEG.rock NEUT.hand=LOC and REAL.3M-throw-USP REAL.3M-throw-USP=MUT	‘the man was holding the rock in his hand and threw it’	JL, JRB1-029-03, 00.10.43-00.11.06	past	elicitation (video stimuli)
errikbə	throw	achievement	ATM	b	y	PFV	x	x	x	x	Narr	past	∅?	V1-Ø		n-errikbu-Ø-ma malarra	REAL.3M-throw-USP=MUT VEG.rock	‘[he] threw the rock’	ST, JRB1-029-03, 00.12.09-00.12.13	past	elicitation (video stimuli)
məra+junga-ja	wake.up.someone	achievement	ATM	b	y	PFV	x	x	x	c	Narr	past	DiscCon SoE	biya V1-Ø		biya n-aka nu-wilyab nenəngkwarba nen-məra+junga-ja-Ø=ma	and.then 3M-this 3M-one 3M.man REAL.3M>3M-wake.up-CAUS-USP=MUT	‘and then he woke him up’	ST, JRB1-029-03, 00.23.31-00.23.38	past	elicitation (video stimuli)
məra+junga-ja	wake.up.someone	achievement	ATM	b	y	PFV	x	t	x	c	BackFore	past	Back-Fore-PST Overlap-PST DiscCon	V0-PST akena V1-∅	Backgr on 'sleeping'	n-aka nenəngkwarba nə-rrak-ajey-mə=na ni-jungu-nə-ma marrnga chair=manja akena nu-wilyaba nenəngkwarba nenu-məra+janga-ja-Ø=ma	3M-this 3M.man 3M-?-be.upright.PST=MUT=TAG REAL.3M-be.tired-PST=MUT VEG.sleep NEUT.chair=LOC but 3M-one 3M.man REAL.3M>3M-wake.up-CAUS-USP=MUT	the man was sleeping in the chair, but the [other] man woke him up’	JL, JRB1-029-03, 00.24.50-00.25.13	past	elicitation (video stimuli)
məra+junga-ja	wake.up.someone	achievement	ATM	b	y	PFV	x	x	x	x	Narr	past	∅?	V1-Ø		n-akəna nu-wilyaba nenəngkwarba nen-məra+janga-ja-Ø=ma	3M-that 3M-one 3M.man REAL.3M>3M-wake.up-CAUS-USP=MUT	‘the man woke him up’	ST, JRB1-029-03, 00.25.58-00.26.04	past	elicitation (video stimuli)
ruk+wulyaka-ja	stir; spin; turn.around	activity	PLUR ACT BD	n	y	PFV	x	x	x	c	Narr	past	SoE DiscCon	V1-Ø akwa V2-Ø	could be durative perfective	nu-ruki+lyaka-ja-Ø=ma akwa nə-dhakba-jang-Ø=ma	REAL.3m>NEUT-stir-CAUS-USP=MUT and REAL.3M-grind-REFL-USP=MUT	‘he stirred and ground up [the food]’	ST, JRB1-029-03, 00.27.28-00.27.34	past	elicitation (video stimuli)
dhakba-jangu	grind; knock [+REFL]	accomplishment	Q INCR	n	y	PFV	x	x	x	x	Narr	past	∅?	V1-Ø		nə-dhakba-jangu-Ø=ma	REAL.3M-grind-REFL-USP=MUT	‘[he] ground up [the food]’	JL, JRB1-029-03, 00.27.50-00.27.53	past	elicitation (video stimuli)
dhakba-jangu	grind; knock [+REFL]	activity	PLUR ACT BD	n	y	PFV	x	t	x	c	Narr	past	SoE DiscCon	V0-PST akwa V1-Ø		nu-ruki+lyaka-ja-Ø=ma akwa nə-dhakba-jang-Ø=ma	REAL.3m>NEUT-stir-CAUS-USP=MUT and REAL.3M-grind-REFL-USP=MUT	‘he stirred and ground up [the food]’	ST, JRB1-029-03, 00.27.28-00.27.34	past	elicitation (video stimuli)
jerrədhə	get finished; become finished; be finished	achievement	ATM	b	y	PFV	x	t	rl	cp::	Narr	past	AspMod SoE-PST XTD DiscCon	ngawa (cont.act) V0-XTD-PST eken V1-Ø	not sure about gloss for RED - XTD?	ni-yen-jem-Ø ngaw n-a:::dhərra-Ø=m akən jurra ekena ne-jerrədhə-Ø=m akən jurr- jurra kemba nara=b kən-adhərre-na	REAL.3M-REDUP-do-PST cont.act REAL.3M>NEUT-XTD.pierce-USP=MUT NEUT.that NEUT.paper but REAL.3M-be.finished-USP=MUT NEUT.that NEUT.paper NEUT.paper then NEG=EMPH IRR.3M-pierce-PST	‘He kept on piercing the paper bag, but then he finished, then he didn’t pierce [it] anymore’	ST, JRB1-037-01, 00:25:09-00:25:18	past	elicitation (video stimuli)
jerrədhə	get finished; become finished; be finished	achievement	ATM	b	y	PFV	x	t	x	c	BackFore	past	Overlap-PST DiscCon + AspMod	angkwabəbərn=lhanga ('all day long') V0-PST eken V1-Ø		n-aka nenəngkwarba angkwabəbərn=lhanga n-adhərra-ngu=ma akəna jurra eken nara=ba nə-jerrədha-Ø	3M-that 3M.man all.day=ABL REAL.3M>NEUT-pierce-PST=MUT NEUT.that NEUT.paper but NEG=EMPH REAL.3M-be.finished-USP	‘He was piercing the bag all day, but then he finished’. (what about nara???)	CW, JRB1-037-01, 00:26:14-00:26:26	past	elicitation (video stimuli)
jerrədhə	get finished; become finished; be finished	achievement	ATM GROUP	b	y	PFV	x	t	x	cclit	Narr	past	TempSub << Matrix SoE-PST DiscCon PST	yarrungkwa V1-Ø=lhangwa V2-PST akwa V3-PST		yarrungkwa na-jerrədhə-Ø=ma school=a up at the school, yah na-jerrədhə-Ø=ma s- na-jarrə-Ø=mə=lh- na-jerrədhə-Ø=mə=lhangwa school-a wurr-a wurri-yukwujiya na-malyangke-nə=ma akwa nə-lhəwrradhə-na	yesterday REAL.3A-be.finished-USP=MUT NEUT.school=PF REAL.3A- be.finished-USP=MUT REAL.3A- be.finished-USP=MUT=ABL REAL.3A- be.finished-USP=MUT=ABL NEUT.school-a 3A-this 3A-small REAL.3A-play-PST=MUT and REAL.3A-return-PST	‘Yesterday after they finished at school, the kids played and then went home’	JL, JRB1-033-01, 00.28.42-00.29.09	past	elicitation (video stimuli)
mureye	be.hungry	state	CUM	dna	n	IMPFV	x	x	x	x	Backgr	present	∅?	V1-Ø		ngayuwa ngu-məreya-Ø anhəngu=wa	1.PRO REAL.1-be.hungry-USP food=ALL	‘I’m hungry for food’	JL, JRB1-050-01, 00.15.27-00.15.32	present	elicitation (video stimuli)
mureye	be.hungry	state	CUM	dna	n	IMPFV	m	x	x	x	Backgr	present	PrMod	adhuwaba V1-Ø		adhuwaba n-aka nenəngkwarba nu-məreya-Ø	today 3M-this 3M.man REAL.3M-be.hungry-USP	‘Today the man’s hungry’	JL, JRB1-050-01, 00.16.29-00.16.32	present	elicitation (video stimuli)
mureye	be.hungry	state	CUM	dna	n	IMPFV	x	x	x	x	Backgr	present	∅?	V1-Ø		n-angaba nenəngkwarba nu-mrey-Ø=dha	3M-that.one 3M.man REAL.3M-be.hungry-USP=TRM	‘that man, he’s hungry’	JL, JRB1-050-01, 00.19.05-00.19.13	present	elicitation (video stimuli)
mureye	be.hungry	state	CUM	dna	n	IMPFV	x	x	x	x	Backgr	present	∅			ngu-mreya-ngu-ma, past, ngu-məreya-Ø, now, ngu-mreye-na, in the middle	REAL.1-be.hungry-PST=MUT REAL.1-be.hungry-USP REAL.1-be.hungry-NPST	missing translation	JL, JRB1-050-01, 00.15.46-00.15.54	present	elicitation (video stimuli)
abuwalya	be.hungry.for.meat	state	CUM	b/open scale	n	IMPFV	x	t	x	c	Explanation	past	Matrix-PST >> DiscCon CausSub Backgr	biya NOM-EVT arakba, V0-PST V1-Ø=baba ('because V1')		biya nenə-mərnda-kə-lhalhəka wurradhədiyuwangkwa arakba, nə-lhəke-na nə-lhəbi-nə=dha n-abuwalya-Ø=baba=dha	and.then REAL.3M>3A-many-NSR-leave 3A.old.women COMPL.ACT 3M-go-PST REAL.3M-hunt-PST=TRM REAL.3M-hungry.for.meat-USP=REAS=TRM	‘Then he left the old ladies and he went hunting because he was hungry for meat’	Dingarna-langwa akwa wurruwarda-langwa, A3369a Side1 a3.5	past	narrative
angburadha	get.tired.of(something); become.tired.of(something)	CofS	ATM	b	n	PFV	x	t	x	cc	Narr	past	DiscCon SoE DiscCon-PST	arakba V1-Ø akwa V2-PST V3-Ø ('went V3')		ngalh-aje=ka arakba ying-angburadha-Ø dhərndh-enikba akwa yingə-mungkulha yingə-mungkulhi-nga	3F.PRO-CofR=EMPH COMPL.ACT REAL.3F-get.tired-USP 3F.mother-KIN.3M and REAL.3F-sleep.PST REAL.3F-sleep-CofS	‘His mother got tired of him and went to sleep’	Kwurrirda Kwurrirda-langwa, A3369a Side1 a3.3	past	narrative
ruk+wulyaka-ja	stir; spin; turn.around	iterated semelfactive	PLUR SEM UBD	n	y	IMPFV	x	tm	x	co	BackFore	past	Sim-PST Overlap-PST	V0-PST akwa V1-Ø, V2-PST akwa V3-PST	Bck on 'stir'	yarrungkwa nu-wilyaba nenəngkwarba nə-murrkulhə=ma eni=lhang=ma murrkwa akwa nə-rukwi+lyakaja-Ø=ma anhənga en-aja nu-wilyaba nenəngkwarba nə-lhəke-na akwa nə-kwa+bijangu-nə=ma	yesterday 3M-one 3M.man REAL.3M-lie.down.PST=MUT 3M.PRO=POSS=INST VEG.stomach and REAL.3M-stir-USP=MUT NEUT.food 3M.PRO-CofR 3M-one 3M.man REAL.3M-go-PST and REAL.3M-jump-PST=MUT	‘yesterday the man was lying down on his stomach, he stirred the food, [and] another man went past and jumped’	CW, JRB1-032-01, 00.21.23-00.22.05	past	elicitation (video stimuli)
ruk+wulyaka-ja	stir; spin; turn.around	iterated semelfactive	PLUR SEM UBD	n	y	IMPFV	x	t	x	o	BackFore	past	Back-Fore-PST Overlap-PST DiscCon	V0-Ø V1-PST	Fore on following V	n-akəna nenəngkwarba nu-rukwi+lyakaja-Ø=ma anhənga ena-ja nu-wilyaba nenəngkwarba nenu-kwa-Ø=ma ayika	3M-that 3M.man REAL.3M>NEUT-stir-USP=MUT NEUT.food 3M.PRO-CofR 3M-one 3M.man REAL.3M>3M-give-PST=MUT NEUT.stick	‘The man stirred the food and the other man gave him the stick’	CW, JRB1-032-01, 00.28.50	past	elicitation (video stimuli)
ruk+wulyaka-ja	stir; spin; turn.around	iterated semelfactive	PLUR SEM UBD	n	y	IMPFV	x	tm	x	co	BackFore	past	PstMod + SoE-PST parataxis + SoE DiscCon	yarrungkwa V1-Ø V2-PST akwa V3-Ø	Bck on 'stir'	yarrungkwa n-akəna nenəngkwarba nu-rukwi+lyakaja-Ø=ma anhənga ene-ja nu-wilyaba nenəngkwarba nenu-kwa-Ø=ma ayika akwa nu-rukwu+lyakaja-Ø=ma	yesterday 3M-that 3M.man REAL.3M>NEUT-stir-USP=MUT NEUT.food 3M.PRO-CofR 3M-one 3M.man REAL.3M>3M-give- PST=MUT NEUT.tree and REAL.3M>NEUT-stir-USP=MUT	‘the man was stirring the food, the other man give him a stick, and he kept stirring the food’	CW, JRB1-032-01, 00.29.45	past	elicitation (video stimuli)
ruk+wulyaka-ja	stir; spin; turn.around	iterated semelfactive	PLUR SEM UBD	n	y	IMPFV	x	x	i	x	Backgr?	past	AspMod + Overlap DiscCon	akwa n-irribərriba (3sg.keep.on) V1-∅		akwa n-irribərriba nu-rukwə+lyakaja-Ø=ma	and 3M-keep.on REAL.3M>NEUT-stir-USP=MUT	‘he was keep on stirring’	CW, JRB1-032-01, 00.30.45	past	elicitation (video stimuli)
angkarrə	run	activity	CUM	dna	y	IMPFV	x	x	x	x	Backgr	present	∅	V1-Ø		n-angkarra-Ø	REAL.3M-run-USP	‘[he] runs’ (JB asks ‘and is that for now or before?’, JL replies ‘now’)	JL, JRB1-060-02, 00.25.33-00.25.38	present	elicitation (video stimuli)
angkarrə	run	activity	CUM	dna	y	IMPFV	m	x	x	x	Backgr	present	PrMod 'now'	V1-Ø		n-angkarra-Ø, now, n-angkarra-Ø	REAL.3M-run-USP REAL.3M-run-USP	‘[he] runs’	JL, JRB1-060-02, 00.27.39-00.27.42	present	elicitation (video stimuli)
angkarrə	run	hab iterated achievement	STATE HAB	n	y	IMPFV	x	t	li	g	Backgr	past	PstMod-XTD + AspMod Iter + SoE DiscCon	a:::rakbəwiya n-ərribərriba V0-Ø biya V1-Ø	Durative bounded?	n-aka nanəngkwarb a:::rakbəwiya n-ərribərriba n-adhakba-ja-Ø=m door=manja biya nanga wurr-akəna warnmamalya ambəlyuma aləlbaj akən=manj angalya n-angkarrə-Ø=m yedhakəna	3M-that 3M.man XTD.long.ago 3M-keep.on REAL.3M-knock-REFL-USP=MUT NEUT.door=LOC and.then ? 3A-that 3A.person NEUT.two ? NEUT.that=LOC NEUT.place REAL.3M-run-USP=MUT that.way	‘A long time ago the man used to keep knocking on the door and then the other man ran that way’	ST, JRB1-037-02, 00.19.55-00.20.07	past	elicitation (video stimuli)
angkarrə	run	inchoative activity = achievement	ATM	dna	y	PFV	x	t	x	c	BackFore	past	PstMod + Overlap-PST SoE DiscCon	yarrungkwa V-2-PST V-1-PST V0-PST biya V1-∅	Fore on 'run'	yarrungkwa n-akən ni-yukwujiya na-rrak-ajey=m akwa nəm-arr-abərrəngka-Ø=ma m-arrakwəyabe-nə=ma maməwura biya wurr-akən wurruwarda nəw-angkarrə-Ø=m enəwa=wa	yesterday 3M-that 3M-small REAL.3M-forehead-stand.PST=MUT and REAL.3M>VEG-REDUP-look-PST=MUT REAL.VEG?-rise-PST=MUT VEG.sun and.then COLL-that COLL.dog REAL.COLL-run-USP=MUT 3M.PRO=ALL	‘Yesterday the boy was sitting and watching the sun rise, and then the dog ran up to him’	ST, JRB1-034-01, 00.04.17-00.04.27	past	elicitation (translation task)
angkarrə	run	inchoative activity = achievement	ATM	dna	y	PFV	x	t	x	c	BackFore	past	Overlap-PST SoE DiscCon	V0-PST akena V1-Ø	Back on 1st V	nu-ngurrkwa-rnə=ma yiburadh=uwa akena n-angkarra-Ø	REAL.3M>MASC-hunt-PST=MUT MASC.wallaby=ALL but REAL.MASC-run-USP	‘[The man] was hunting the wallaby, but it ran away’	ST, JRB1-034-01, 00.06.53-00.07.01	past	elicitation (translation task)
angkarrə	run	activity bounded	CUM BD	dna	n	PFV	x	t	x	p	Narr	past	SoE-PST parataxis	V1-Ø V2-PST akwa V3-PST		y-aka yirrburrbula n-angkarra-Ø m-əkəna [nu?]ma-jama-Ø akəna wall=a akwa [nə?]-nguwanjə-n=dha	MASC-this MASC.ball REAL.MASC-roll-USP VEG-that REAL.VEG-do-PST NEUT.that NEUT.wall= PF and REAL.NEUT(?)-stop-PST=TRM	‘The ball rolled hit the wall and stopped’	ST, JRB1-034-01, 00.16.53-00.17.00	past	elicitation (translation task)
angkarrə	run	activity bounded	CUM BD	dna	y	PFV	x	t	x	c	Narr	past	SoE DiscCon-PST	akwa V1-∅ arakba V2-PST n-ərribərriba		akwa n-angkarra-Ø arakba nu-wurda-nga angwarnda=manja abalkaya=dha	and REAL.3M-run-USP COMPL.ACT REAL.3M-climb-PST NEUT.stone=LOC above=TRM	‘And he ran off (and) climbed high on the rocks’	Chasm Island, A3368a Side1, 00:01:38.930-00:01:43.290	past	narrative
ngərandha	cut.up	iterated accomplishment	PLUR ACC BD?	n	y	PFV	x	tm	x	it	Narr	past	PstMod + IterPred	yarrungkwa V1-∅ n-ərribərriba ('keep on')		n-aka nənəngkwarba yarrungkwa nə-ngərandha-Ø=m akən bread=a n-ərribərriba	3M-that 3M.man yesterday REAL.3M>NEUT-cut.up-USP=MUT NEUT.that NEUT.bread=PF 3M-keep.on	‘Yesterday the man kept on cutting up the bread’	ST, JRB1-038-01, 00:04:17-00:04:25	past	elicitation (video stimuli)
marerrəmaja	hang.out(something)	accomplishment	Q INCR	closed max	y	PFV	x	x	x	x	Narr	past	∅?	V1-Ø		dh-akəna dhədharrəngka yingu-marerrəmaja-Ø=ma dumbala line=manja	3F-that 3F.woman REAL.3F-hang.out-USP=MUT FEM.clothes NEUT.line=LOC	‘The woman hung out the clothes on the line’	CW, JRB1-032-01, 00.24.19	past	elicitation (video stimuli)
marerrəmaja	hang.out(something)	accomplishment	Q INCR	closed max	y	PFV	x	t	x	x	Narr	past	∅?	V1-Ø		yarrungkwa dh-akəna dhədharrəngka ying-mərerrəmaja-Ø=ma dumbala	yesterday 3F-that 3F.woman REAL.3F-hang.out-USP=MUT FEM.clothes	‘The woman hung out the clothes’	CW, JRB1-032-01, 00.25.29	past	elicitation (video stimuli)
marerrəmaja	hang.out(something)	accomplishment	Q INCR	closed max	y	PFV	x	t	x	c	Narr	past	SoE DiscCon-PST	V1-Ø aken V2-PST		dh-akan dhədharrəngka ying-merrimaja-Ø=ma dhumbala aken n-aka nanəngkwarba nangə-kwa-Ø-m dejik=dha	3F-that 3F.woman REAL.3F-hang.out-USP=MUT FEM.clothes then 3M-that 3M.man REAL.3M>3F-give-PST=MUT NEUT.thing=TRM	‘The woman hung the clothes out, then the man gave her something’	ST, JRB1-032-01, 00:13:13-00:13:31	past	elicitation (video stimuli)
marerrəmaja	hang.out(something)	accomplishment	Q INCR	closed max	y	PFV	x	tm	x	cc	Narr	past	PstMod + SoE DiscCon-PST	yarrungkwa V1-Ø akəna V2-PST biya V3-PST		dh-akən dhədharrəngka yarrungkwa ying-merrəmaju-Ø=ma akəna dhumbala biya n-akəna nanəngkwarba ni-ləka-n ngaluwə-wa biya yinga-ma-ng akəna amdejika	3F-that 3F.woman yesterday REAL.3F-hang.out-USP=MUT NEUT.that FEM.clothes and.then 3M-that 3M.man REAL.3M-go-PST 3F.PRO=ALL and.then REAL.3F-take-PST NEUT.that NEUT.that	‘Yesterday the woman hung out the clothes and then the man went to her and took something from her’	ST, JRB1-037-02, 00:15:10-00:15:27	past	elicitation (video stimuli)
marerrəmaja	hang.out(something)	hab accomplishment	STATE HAB	dna	y	IMPFV	x	tm	x	cc	Backgr	past	PstMod + SoE DiscCon-PST	arakb-ərakbəwiya V1-∅ biya V2-PST biya V3-PST		arakb-ərakbəwiya dh-akan dhədharrəngka ngalang=manj angalya ying-merrəmaja-Ø-m akən dhubala biya n-akən nanəngkwarba nə-ləka-rna ngaluwə-wa biya dh-akəna yinga-ma-ng akən amdejika enuwa=lhanga	REDUP-long.ago 3F-that 3F.woman 3F.PRO=LOC NEUT.place REAL.3F-hang.out-USP=MUT NEUT.that FEM.clothes and.then 3M-that 3M.man REAL.3M-go-PST 3F.PRO=ALL and.then 3F-that 3F-take-PST NEUT.that NEUT.thing 3M.PRO=ABL	‘A long time ago the woman hung the clothes out in that place and then the man went to her and she took something from him’	ST, JRB1-037-02, 00:15:46-00:16:03	past	elicitation (video stimuli)
marerrəmaja	hang.out(something)	iterated accomplishment	PLUR ACC BD?	n	y	PFV	x	t	di	cc	Narr	past	AspMod + SoE DiscCon-PST	dhə-rribərrib ngəw 1-Ø biya V2-PST biya V3-Ø		dh-akən dhədharrəngka dhə-rribərrib ngəw ying-merrəmaja-Ø=ma-m a-md-akən dhumbala angkəbəbərnama biya n-akən nanəngkwarba ankgwabəbənama nu-wilyaka-Ø=m ayika biya dh akən dhədharra yingi-na-marrakaja-Ø=m dh-ərribərrib a-mdh-akən ayik=dha yengi-yenja-Ø=m ngəwa=dha	3F-that 3F.woman 3F-keep.on CONT.ACT REAL.3F-hang.out-USP=MUT-? NEUT-many-that FEM.clothes all.day and.then 3M-that 3M.man all.day REAL.3M-carry-PST=MUT NEUT.tree and.then 3F-that 3F.woman REAL.3F-3M-grab-USP=MUT 3F-keep.on NEUT-many-that NEUT.tree=TRM 3F-do-PST=MUT CONT.ACT=TRM	‘The woman kept on hanging out the clothes all day, and then the man took the stick and the woman grabbed it’	ST, JRB1-037-02, 00:17:13-00:17:31	past	elicitation (video stimuli)
lhəka	go	inchoative activity = achievement	ATM	n	y	PFV	x	t>>	x	p	Narr	past	SoE DiscCon >> IRR.PST	V1-Ø V2-CofS-Ø akwa V3-Ø akwa V4-Ø >> V5-IRR-PST	Is V1 V2 a case of SVC?	n-akən nanəngkwarba nə-lhəka-Ø=ma n-ambarr-nga=ma akən-manja chair=a akwa nə-mədhilyakbə-Ø-ma akwa kamba nə-kw-aji-nga=ma kənə-lhəka-nə=ma	3M-that 3M.man REAL.3M-go-USP=MUT REAL.3M-sit-CofS=MUT NEUT.that=LOC chair=PF and REAL.3M-cough-USP=MUT and then REAL.3M-half(?)-be.upright-CofS=MUT IRR.3M-go-PST=MUT	‘he stood up and walked away’	ST, JRB1-037-01, 00:31:11-00:31:21	past	elicitation (video stimuli)
lhəka	go	iterated achievement	PLUR ACH	dna	y	PFV	x	x	hi	x	Narr	past	AspMod	angkawura ('all.the.time') angkwababərna ('every day') V1-Ø	corrected glosses for angkawura + angkwababərna	angkawura angkwababərna nə-lhəka-Ø en=lhang=wa angalya	all.the.time always REAL.3M-go-USP 3M.PRO=POSS=ALL NEUT.place	‘he went to his house several times’	JL, JRB1-049-01, 00.09.25-00.09.34	past	elicitation (translation task)
lhəka	go	iterated achievement or hab achievement	PLUR ACH or HAB ACH	dna	y	PFV?	x	x	hi	x	Narr? Backgr?	past	AspMod	angkawura ('all the time') angkwababərnama ('every day') V1-Ø	corrected glosses for angkawura + angkwababərna	angkawura angkabəbərnama nə-lhəka-Ø en=lhang=wa angalya	all.the.time always REAL.3M-go-USP 3M.PRO=POSS=ALL NEUT.place	‘he always went from his place’	JL, JRB1-049-01, 00.11.56-00.12.05	past	elicitation (translation task)
lhəka	go	iterated achievement or hab achievement	PLUR ACH or HAB ACH	dna	y	PFV?	x	x	hi	x	Narr? Backgr?	past	AspMod	angkabəbərnama ('every day') V1-Ø		angkabəbərnama nə-lhəka-Ø en=lhang=wa angalya always	always REAL.3M-go-USP 3M.PRO=POSS=ALL NEUT.place	‘he went to his house, several times, he went to his house’	JL, JRB1-049-01, 00.12.28-00.12.44	past	elicitation (translation task)
lhəka	go	iterated achievement or hab achievement	PLUR ACH or HAB ACH	dna	y	IMPFV?	x	m	hi	x	Backgr (Hab)?	past	PstMod + AspMod	arakbəwiya angkabəbərnama V1-Ø		arakbəwiya angkabəbərnama nə-lhəka-Ø en=lhang=wa angalya	long.ago always REAL.3M-go-USP 3M.PRO=POSS=ALL NEUT.place	‘like several times, many times, or several times he used to- went- walked to his house’	JL, JRB1-049-01, 00.13.00-00.13.20	past	elicitation (translation task)
njurrkwa-ja	move	activity bounded/inchoative activity	ATM or ACTIVITY BD	n	y	PFV	x	t	x	c	Narr	past	SoE-PST DiscCon	V0-PST akwa V1-Ø		n-aka nenəngkwarba ni-jəra-ng=ma akwa ni-njurrkwa-ja-Ø=m akən fridge=a	3M-this 3M.man REAL.3M>NEUT-push-PST=MUT and REAL.3M>NEUT-move-CAUS=USP=MUT NEUT.that NEUT.fridge=PF	‘The man pushed and moved the fridge’	ST, JRB1-038-01, 00:07:50-00:07:58	past	elicitation (video stimuli)	REAL-push-PST=MUT + akwa + REAL-move-CAUS=USP=MUT
njurrkwa-ja	move	activity bounded/inchoative activity	ATM or ACTIVITY BD	n	y	PFV	x	tm	x	c	Narr	past	PstMod + SoE-PST DiscCon	yarrungkwa V0-PST akwa V1-Ø		n-akəna nanəngkwarba yarrungkwa ni-jara-ngu=ma akwa ni-njurrkwa-ja-Ø=ma akən fridge	3M-that 3M.man yesterday REAL.3M>NEUT-push-PST=MUT and REAL.3M>NEUT-move-CAUS=USP=MUT NEUT.that NEUT.fridge	‘Yesterday the man pushed and moved the fridge’	ST, JRB1-038-01, 00:08:17-00:08:27	past	elicitation (video stimuli)	REAL-push-PST=MUT + akwa + REAL-move-CAUS=USP=MUT
njurrkwa-ja	move	activity bounded/inchoative activity	ATM or ACTIVITY BD	n	y	PFV	x	t	x	c	Narr	past	SoE-PST DiscCon	V0-PST akwa V1-Ø		n-akəna nenəngkwarba ni-jura-ngu=ma akwa ni-njurrkwa-ja-Ø=ma akəna fridge=a	3M-that 3M.man REAL.3M>NEUT-push-PST=MUT and REAL.3M>NEUT-move-CAUS=USP=MUT NEUT.that NEUT.fridge=PF	‘The man pushed and moved the fridge’	JL, JRB1-038-01, 00:09:07-00:09:17	past	elicitation (video stimuli)	REAL-push-PST=MUT + akwa + REAL-move-CAUS=USP=MUT
njurrkwa-ja	move	activity bounded/inchoative activity	ATM or ACTIVITY BD	n	y	PFV	x	tm	x	c	Narr	past	PstMod + SoE-PST DiscCon	arakbəwiya V0-PST akwa V1-Ø		arakbəwiya n-akəna nenəngkwarba ni-jura-ngu=ma akwa ni-njurrkwa-ja-Ø=ma akəna fridge	long.ago 3M-that 3M.man REAL.3M>NEUT-push-PST=MUT and REAL.3M>NEUT-move-CAUS=USP=MUT NEUT.that NEUT.fridge	‘Long time ago the man pushed and moved the fridge’	JL, JRB1-038-01, 00:09:22-00:09:32	past	elicitation (video stimuli)	REAL-push-PST=MUT + akwa + REAL-move-CAUS=USP=MUT
njurrkwa-ja	move	activity bounded/inchoative activity	ATM or ACTIVITY BD	n	y	PFV-Weak	x	t	x	c	Narr	past	SoE-PST DiscCon	V0-PST akwa V1-Ø		n-akəna nenəngkwarba ni-jura-ngu=ma akwa nu-njurr-kwa-ja-Ø=ma akəna- akəna fridge=a akena nara=dha	3M-that 3M.man REAL.3M>NEUT-push-PST=MUT and REAL.3M>NEUT-move-CAUS=USP=MUT NEUT.that- NEUT.that NEUT.fridge=PF but NEG=TRM	‘The man pushed and [tried to] move the fridge, but nothing’	JL, JRB1-038-01, 00:12:39-00:13:00	past	elicitation (video stimuli)	REAL-push-PST=MUT + akwa + REAL-move-CAUS=USP=MUT	frustrative
njurrkwa-ja	move	bounded iterated activity	ATM or ACTIVITY BD	n	y	PFV-Weak	x	tm	i	p	Narr	past	PstMod + SoE-PST DiscCon + RED.echo	V-1-PST V0-PST akwa V1-Ø	PC - weak perfective	yarrungkwa n-akəna nenəngkwarba nu- ni-jura-ngu=ma- ni-jura-ngu=ma akən fridge=a akwa nə-njurrukwa-ja-Ø=ma ekena nara engkəbarrungwarrungwa akəna	yesterday 3M-that 3M.man REAL.3M>NEUT-push-PST=MUT REAL.3M>NEUT-push-PST=MUT NEUT.that NEUT.fridge=PF and REAL.3M>NEUT-move-CAUS=USP=MUT but NEG NEUT.heavy NEUT.that	‘Yesterday the man pushed the fridge and [tried to] move [it], but nothing, it was too heavy’	JL, JRB1-038-01, 00:13:47-00:14:06	past	elicitation (video stimuli)	REAL-push-PST=MUT + akwa + REAL-move-CAUS=USP=MUT	frustrative
njurrkwa-ja	move	bounded iterated activity	PLUR ACT BD	n	y	PFV-Weak	x	m	x	c	Narr	past	PstMod + SoE DiscCon	arakbəwiya V0-Ø akwa V1-Ø	PC - weak perfective	arakbəwiya n-aka nenəngkwarba nu-njurr-kwa-ja-Ø=ma akəna fridge=a ekena engkəbərrungwərrungwa or kamba ngə-nekibulu-Ø=m akəna	long.ago 3M-this 3M.man REAL.3M>NEUT-move-CAUS-USP=MUT NEUT.that NEUT.fridge=PF but NEUT.heavy then REAL.3M>NEUT(?)-give.up(?)-USP=MUT NEUT.that	‘Long time ago the man [tried to] move the fridge, but it was too heavy’ or ‘and so he gave up’	JL, JRB1-038-01, 00:13:47-00:14:06	past	elicitation (video stimuli)		frustrative
njurrkwa-ja	move	activity bounded/inchoative activity	ATM or ACTIVITY BD	n	y	PFV	x	tm	x	c	Narr	past	SoE DiscCon-PST + PstMod	adhuwaba V1-∅ akwa V2-PST		adhuwaba n-aka nanəngkwarba ni-njurrkwa-ja-Ø=ma akwa ni-jəra-ng=m akən fridge	today 3M-that 3M.man REAL.3M>NEUT-move-CAUS-USP=MUT and REAL.3M>NEUT-push-PST=MUT NEUT.that NEUT.fridge	‘Today the man moved and pushed the fridge’	ST, JRB1-038-01, 00:08:35-00:08:42	past	elicitation (video stimuli)	REAL-move-CAUS=USP=MUT + akwa + REAL-push-PST=MUT
njurrkwa-ja	move	iterated activity	PLUR ACT	n	y	PFV? IMPFV?	x	tm	di	it	Narr? Backgr?	past	IterationV-PST + PstMod	mamawura ('day') lharrma-PST V1-∅	larrma or lharrma? + Translation	n-akəna nenəngkwarba nəma-larrma-ngu-ma mamawura ni-jara-ngu=ma or ni-njurrkwa-ja-Ø=ma akəna fridge	3M-that 3M.man REAL.3M>VEG-do.all.day- PST=MUT VEG.day REAL.3M>NEUT-push-PST=MUT REAL.3M>NEUT-move-CAUS-USP=MUT NEUT.that NEUT.fridge	‘The man was pushing and moving the fridge all day’	JL, A JRB1-038-01, 00:10:29-00:10:37	past	elicitation (video stimuli)
anga	bite	iterated achievement	PLUR ACH?	n	y	IMPFV	m	x	x	x	Backgr	present	PrMod	enenuwiya V1-∅	possibly a translation issue here…	enenuwiya wurr-akəna wurruwarda nan-anga-Ø n-akəna nenjarrngalya	now COLL-that COLL.dog REAL.COLL>3M-bite-USP 3M-that 3M.boy	‘The dog is biting the boy now’	ST, JRB1-054-01, 00.13.10-00.13.14	present	elicitation (flash card stimuli)
anga	bite	iterated achievement	PLUR ACH?	n	y	IMPFV	x	x	x	x	Backgr	present	∅?	V1-∅	possibly a translation issue here…	nənenəngkwarba nəm-anga-Ø=ma muwadha	3M.man REAL.3M>VEG-bite-USP=MUT VEG.dilly.bag	he's biting the dilly bag’	ST, JRB1-057-01, 00.02.26-00.02.47	present	elicitation (translation task)
anga	bite	achievement	ATM	b	y	PFV	x	m	x	x	Narr	past	PstMod	yarrungkwa V1-∅		yarrungkwa wurr-akəna wurruwarda nan-anga-Ø n-akəna nenjarrngalya	yesterday COLL-that COLL.dog REAL.COLL>3M-bite-USP 3M-that 3M.boy	‘Yesterday the dog bit the boy’	ST, JRB1-054-01, 00.13.10-00.13.14	past	elicitation (flash card stimuli)
anga	bite	achievement	ATM	b	y	PFV	x	m	x	x	Narr	past	PstMod	arakbəwiya V1-∅		arakbəwiya wurr-akəna wurruwarda nan-anga-Ø=ma n-akəna nenjarrngalya	long.ago COLL-that COLL.dog REAL.COLL>3M-bite-USP=MUT 3M-that 3M.boy	‘Long time ago the dog bit the boy’	ST, JRB1-054-01, 00.14.11-00.14.18	past	elicitation (flash card stimuli)
anga	bite	achievement	ATM	b	y	PFV	x	m	x	x	Narr	past	PstMod	yarrungkwa V1-∅		yarrungkwa wurr-akəna wurruwarda nan-anga-Ø=mərra n-akən=manja nanjarrngalya	yesterday COLL-that COLL.dog REAL.COLL>3M-bite-USP=MUT 3M-that=LOC 3M.boy	‘Yesterday the dog bit the boy’	ST, JRB1-054-01, 00.12.06-00.12.12	past	elicitation (flash card stimuli)			When considering the difference between nanangama and nanangamərra, and after producing the form nanangamərra several times and apparently acknowledging it, ST says ‘I would never say nanangamərra, never, doesn't sound right to me. Some people might use it, it is used, but I'd prefer to say- I reckon this sounds right [with =ma]. Yarrungkwa wurrakəna wurruwarda nanangama nakəna nenjarrngalya, tha…
ngemba	bathe	activity	ACT	n	y	PFV?	x	m	x	x	Narr?	past	PstMod	adhuwaba V1-∅		adhuwaba n-akəna nenəngkwarba nə-ngemba-Ø mijiyely=manja	today 3M-that 3M.man REAL.3M-bathe-USP VEG.beach=LOC	‘that man, he swam at the beach’	JL, JRB1-050-01, 00.06.52-00.07.02	past	elicitation (flash card stimuli)
mebi	sing	activity	ACT	n	y	IMPFV	x	x	x	x	Backgr	present	∅?	V1-∅		n-akəna nenəngkwarba nə-mebu-Ø=ma	3M-that 3M.man REAL.3M-sing-USP=MUT	‘the man is singing’	JL, JRB1-049-01, 00.25.23-00.25.50	present	elicitation (translation task)			JL: ‘he sang a song, nəmebuma, nəmebuma, it's singing. Yeah, that man is singing, yeah nakəna nenəngkwarba nəmebuma, he was singing, yeah, he [is] singing, like he's singing now, nakəna nenəngkwarba nəmebuma’
mebi	sing tr.	accomplishment?	ACC	closed max	y	IMPFV	x	x	x	x	Backgr	present	∅?	V1-∅ + Obj		arnkawura n-akəna nenəngkwarba nə-mebu-Ø=ma emeba	one.day 3M-that 3M.man REAL.3M-sing-USP=MUT NEUT.song	‘he [is] singing a song’	JL, JRB1-049-01, 00.27.36-00.28.02	present	elicitation (translation task)			JL: ‘like to me, I heard that man, he was singing, so arnkawura nakəna nenəngkwarba nəmebuma emeba, nəmebuma, he was like sing- he [is] singing, I heard him singing, so nəmebuma, yeah, numebuma, I heard him singing, he was s- I heard him singing a song, so nəmebuma’
mebi	sing	activity bounded	CUM MAX	dna	y	PFV	x	x	x	x	Narr?	past	∅?	V1-∅	Translation suggests a transitive reading. Rather more like a bounded activity?	n-akəna nenəngkwarba nə-mebu-Ø=ma	3M-that 3M.man REAL.3M-sing-USP=MUT	‘he sang a song’	JL, JRB1-049-01, 00.25.23-00.25.50	past	elicitation (translation task)			JL: ‘he sang a song, nəmebuma, nəmebuma, it's singing. Yeah, that man is singing, yeah nakəna nenəngkwarba nəmebuma, he was singing, yeah, he [is] singing, like he's singing now, nakəna nenəngkwarba nəmebuma’; JL doesn’t like this form as much as others such as nəmebinəma
mebi	sing	activity bounded	CUM MAX	dna	y	PFV	x	x	x	x	Narr?	past	∅?	V1-∅ + Obj		arnkawura n-akəna nenəngkwarba nə-mebu-Ø=ma emeba	one.day 3M-that 3M.man REAL.3M-sing-USP=MUT NEUT.song	‘he sang a song’	JL, JRB1-049-01, 00.27.36-00.28.02	past	elicitation (translation task)			JL: ‘like to me, I heard that man, he was singing, so arnkawura nakəna nenəngkwarba nəmebuma emeba, nəmebuma, he was like sing- he [is] singing, I heard him singing, so nəmebuma, yeah, numebuma, I heard him singing, he was s- I heard him singing a song, so nəmebuma’
arrangba	collect	accomplishment	Q INCR	closed max	y	PFV	x	tm	x	c	Narr	past	PstMod + SoE DiscCon-PST	yarrungkwa V1-Ø akwa V2-PST akwa V3-PST		yarrungkwa n-akən nenəngkwarba n-arrangba-Ø=ma ayika-murriya akwa nə-ləraka-Ø angwura akwa nə-dhaka-Ø amadhangkwa yiburadha=lhangwa	yesterday 3M-that 3M.man REAL.3M-collect-USP=MUT NEUT.tree-the.rest and REAL.3M-light.fire-PST NEUT.fire and REAL.3M-cook-PST NEUT.meat MASC.wallaby=POSS	‘Yesterday the man collected the firewood, made a fire, and roasted the wallaby meat’	JL, JRB1-034-01, 00.20.02-00.20.37	past	elicitation (translation task)
engkərrka	think; listen	activity	CUM	n	y	IMPFV	x	x	x	x	Backgr	present	∅?	V1-∅		n-aka nenəngkwarba n-engkirrka-Ø	3M-this 3M.man REAL.3M-think-USP	‘that man, he think[s]’	JL, JRB1-049-01, 00.48.45-00.48.50	present	elicitation (translation task)
engkərrka	think; listen	activity	CUM	n	y	IMPFV	i	x	x	o	Backgr	present	RED-Ech + V-PR	V1-∅ V2-∅ V3-∅ V4-NPST		n-akəna nenəngkwarba n-engkirrka-Ø n-engkirrka-Ø n-engkirrka-ja-ma=na?, n-engkirrka-Ø	3M-that 3M.man REAL.3M-think-USP REAL.3M-think-USP REAL.3M-think-NPST=MUT=TAG REAL.3M-think-USP	‘the man’s thinking’	JL, JRB1-049-01, 00.49.24-00.50.06	present	elicitation (translation task)			JL: ‘yeah that's right, neng- yeah, he's thinking, that man is thinking, naka nenəngkwarba nengkirrkajama, or nakəna nenəngkwarba nengkirrkajawiya, he's thinking, like nengkirrkajawiya, or nakəna nenəngkwarba nengkirrka, he's..’
engkərrka	think; listen	activity	CUM	n	y	IMPFV	x	t	x	c	Backgr	past	SoE-PST DiscCon	V0-PST akwa V1-∅		n-akən James=a n-ardi-nga-ma n-abən nenəngkwarba akwa n-engkərrka-Ø	3M-that James=PF REAL.3M-call.out-PST=MUT 3M-that 3M.man and REAL.3M-listen-USP	‘James called out to that boy, and he listened’	ST, JRB1-054-01, 00.22.57-00.23.06	past	elicitation (translation task)
engkərrka	think; listen	inchoative activity = achievement	ATM	n	y	PFV	x	t	x	c	Narr	past	SoE-PST DiscCon	V0-PST akwa V1-∅		ngayuwa ng-arda-ngu-ma James=wa akwa n-engkərrka-Ø	1.PRO REAL.1-call.out-PST=MUT James=ALL akwa REAL.3M-listen-USP	‘I called out to James, and he listened’	ST, JRB1-054-01, 00.23.45-00.24.05	past	elicitation (translation task)			(in response to ‘could we also say nakəna James-a ningkərrka? [enenuwiya]’ where ST replies ‘no, no, if I was calling out to you I'd use that sentence, ngayuwa ngardanguma James-wa akwa nengkərrka’)
lekbu	blame	achievement	ATM	b	y	PFV	x	x	x	x	Narr	past	∅?	V1-∅	verbum dicendi = achievement	n-aka nanəngkwarba nen-lekbu-Ø=ma n-aka nenjarrngalya	3M-that 3M.man REAL.3M>3M-blame-USP=MUT 3M-that 3M.boy	‘the man accused the boy’	ST, JRB1-051-01, 00.19.41-00.20.01	past	elicitation (translation task)
lekbu	blame	achievement	ATM	b	y	PFV	x	x	x	x	Narr	past	∅?	V1-∅	verbum dicendi = achievement	nen-lekbu-Ø=ma	REAL.3M>3M-blame-USP=MUT	‘he accused him’	ST, JRB1-051-01, 00.19.41-00.20.01	past	elicitation (translation task)
walka	sneak.up	achievement	ATM PREP	b	y	PFV	x	m	x	x	Narr	past	PstMod	arakba=wiya V1-∅		arakba=wiya yukwujə=wiya ngayuwa ngayuwa ngenu-walka-Ø-ma nganyangwa nganamjamjerrka	COMPL.ACT=QUANT little=QUANT 1.PRO 1.PRO REAL.1>3M-sneak-USP=MUT 1.PRO.POSS 3M.grandfather	‘Long time ago the child snuck up on my grandad’	CW, JRB1-001-01, 00.34.39-00.34.51	past	elicitation (translation task)
yerraka-ja	make.ashamed; tell.off	achievement	ATM	b	y	PFV	x	t	x	co	BackFore	past	Overlap-PST SoE DiscCon	V1-0-PST biya V1-∅		wurr-akəna wurr-ambilyuma wurri-yukwuja-kiya na-bey-nu-ma biya neba-rrəngba neni-yerraka-ja-Ø=ma	COLL-that COLL-two COLL-small-two REAL.3A-argue-PST=MUT and.then 3M.uncle-3A.KIN REAL.3M>3A-ashamed-CAUS-USP=MUT	‘The two kids were quarrelling, and then their uncle told them off’	JL, JRB1-034-01, 00.05.36-00.06.00	past	elicitation (translation task)
ngaja	hunt (down)	achievement	ATM PREP	b	y	PFV	x	t	x	c	Narr	past	SoE DiscCon-PST	V1-∅ akwa V2-PST V3-PST		n-aka nenəngkwarba nə-ngaja-Ø=ma yiburadha akwa ni-lhəka-rna angaly=uwa nə-dhaka-Ø=ma	3m-this 3M.man REAL.3M-hunt-USP=MUT MASC.wallaby and REAL.3M-go-PST NEUT.place=ALL REAL.3M>MASC-cook-PST=MUT	‘The man hunted the wallaby, went home, and cooked it’	JL, JRB1-034-01, 00.07.21-00.07.35	past	elicitation (translation task)
ardija-ja	call(someone)	iterated achievement	PLUR ACH	dna	y	IMPFV	x	x	x	r	Back/Explanation	present	Question - PR	V-1-PST V0-PST V1-∅	Perfect-inferential context	aba ni-yamarrka-Ø-me=ka n-aka, ni-yamarrka-Ø-murra=bena n-ardija-ju-Ø-murra?	NEUT.that.over.there REAL.3M-doing.what-PST=MUT=EMPH 3M-this REAL.3M-doing.what-PST=MUT=EMPH REAL.3M-call-USP=MUT	“Oh! What's happened to him, what is he calling for?”	Kwurrirda Kwurrirda-langwa, A3369a Side1 a3.3	present	narrative
ngiyendha	want	state	CUM	dna	y	IMPFV	x	t	x	x	Backgr	past	Matrix-∅ >> ObjSub Pst IRR	V1-∅ V2-∅=PURP (wanted to V2)	past irrealis	ngaya ngi-yendha-Ø=ma k-angkarrə-Ø=m=yedhə yedhəkən yedhəkba=lhangwiya	1.PRO REAL.1-want-USP=MUT IRR.1-run-USP=MUT=PURP from.there Emerald.River=PERL	‘I wanted to run along Emerald River’	JL, JRB1-044-01, 00:07:21-00:07:25	past	elicitation (translation task)
ngiyendha	want	state	CUM	dna	y	IMPFV	x	t	x	x	Backgr	past	Matrix-∅ >> ObjSub Pst IRR	V1-∅ V2-IRR-∅ (wanted to V2)	past irrealis	n-akəna n-eni-ngendha-Ø-m n-akəna n-enukw-enukba n-enu ku-radha-Ø dh-akəna ayika	3M-that REAL.3M.S-3M.O-want-USP=MUT 3M-that 3M-son-3M.KIN 3M-this IRR.3M-chop-USP 3F-that NEUT.tree	‘He wanted his son to chop down the tree’	JL, JRB1-044-01, 00:34:42-00:34:48	past	elicitation (translation task)
radha	chop	state	CUM	dna	y	IMPFV	x	t	x	x	Backgr	past	Matrix-∅ >> ObjSub Pst IRR	V1-∅ V2-IRR-∅ (wanted to V2)	should not be in the sample - past irr utterance, not a past indicative	n-akəna n-eni-ngendha-Ø-m n-akəna n-enukw-enukba n-enu ku-radha-Ø dh-akəna ayika	3M-that REAL.3M.S-3M.O-want-USP=MUT 3M-that 3M-son-3M.KIN 3M-this IRR.3M-chop-USP 3F-that NEUT.tree	‘He wanted his son to chop down the tree’	JL, JRB1-044-01, 00:34:42-00:34:48	past	elicitation (translation task)
kw+arrangə	cut	achievement	ATM	b	y	PFV	x	x	x	x	Narr	past	∅?	V1-∅	ach due to object dimensionality	n-akəna nenəngkwarba nu-kw+arrangu-Ø=ma ayika	3M-that 3M.man REAL.3M>NEUT-half+cut-USP=MUT NEUT.tree	‘The man cut the stick’	CW, JRB1-032-01, 00.01.17	past	elicitation (translation task)
kw+arrangə	cut	accomplishment	Q INCR	closed max	y	PFV	x	x	x	x	Narr	past	∅?	V1-∅		dh-akəna dhədharrəngka yungu-kw+arrangu-Ø=ma bread=a	3F-that 3F.woman REAL.3F>NEUT-half+cut-USP=MUT NEUT.bread=PF	‘The woman cut the bread’	JL, JRB1-032-01, 00:02:22-00:02:29	past	elicitation (translation task)
adhərrə	spear; pierce	achievement	ATM	b	y	PFV	x	x	x	x	Narr	past	∅?	V1-∅	ach due to object dimensionality	n-adhərra-Ø=m akən jurra n-akən nanəngkwarba	REAL.3M>NEUT-spear-USP=MUT NEUT.that NEUT.paper 3M-that 3M.man	‘The man speared the paper’	ST, JRB1-037-01, 00:22:31-00:22:35	past	elicitation (video stimuli)
adhərrə	spear; pierce	achievement	ATM	b	y	PFV	x	x	x	x	Narr	past	∅?	V1-∅	ach due to object dimensionality	adhuwaba n-akən nanəngkwarba n-adhərra-Ø=m akən jurra lyelyingama	today 3M-that 3M.man REAL.3M>NEUT-spear-USP=MUT NEUT.that NEUT.paper MASC.knife	‘Today the man speared the paper with a knife’	ST, JRB1-037-01, 00:22:55-00:23:00	past	elicitation (video stimuli)
adhərrə	spear; pierce	iterated achievement	PLUR ACH BD	dna	y	PFV	x	x	il	it lli	Narr	past	AspMod-PST XTD SoE DiscCon-PST	ngaw V0-RED-PST XTD-V1-∅ ekena V1-∅ kemba NEG V2-IRR-PST		ni-yen-jem-Ø ngaw n-a:::dhərra-Ø=m akən jurra ekena ne-jerrədhə-Ø=m akən jurr- jurra kemba nara=b kən-adhərre-na	REAL.3M-REDUP-do-PST CONT.ACT REAL.3M>NEUT-XTD.spear-USP=MUT NEUT.that NEUT.paper but REAL.3M-be.finished-USP=MUT NEUT.that NEUT.paper NEUT.paper then NEG=EMPH IRR.3M>NEUT-spear-PST	‘He kept on piercing the paper bag, but then he finished, then he didn’t pierce [it] anymore’	ST, JRB1-037-01, 00:25:09-00:25:18	past	elicitation (video stimuli)
adhərrə	spear; pierce	achievement	ATM	b	y	PFV	x	t	x	c	Narr	past	DiscCon SoE	arakba V1-∅		arakba n-ardhərra-Ø n-akəna akwərrerrikba	COMPL.ACT REAL.3M>NEUT-spear-USP 3M-that NEUT.harpoon	‘Then he grabbed a spear (one of the men took his harpoon)’	Chasm Island, A3368a Side1, 00:01:25.200 - 00:01:28.030	past	narrative
adhərrə	spear; pierce	achievement	ATM	b	y	PFV	x	t	di	cons	Narr	past	Matrix-PST >> TempSub SoE	V0-PST yanda=lhangwa ('until') >> V1-∅		na-rukwu-lyuwake-na yanda=lhangwa nuw-ardhərra-Ø=dha	REAL.3A-body-spin-PST nothing=ABL[until] REAL.3A>NEUT-spear-USP=EMPH	‘It went round and round, until it dropped (in the sea)’	Chasm Island, A3368a Side1, 00:01:35.525 - 00:01:38.025	past	narrative
lharrə	fall	achievement	ATM	b	y	PFV	x	x	x	x	Narr	past	∅?	V1-∅		n-akəna nenəngkwarba nə-lharra-Ø	3M-that 3M.man REAL.3M-fall-USP	‘that man fall down’	JL, JRB1-049-01, 00.40.50-00.40.56	past	elicitation (video stimuli)
ngkə+lharrə	fall	accomplishment	Q INCR	closed max	y	PFV	x	t	x	c	Narr	past	SoE-PST DiscCon	V0-PST akwa V1-Ø		n-aka nənəngkwarba ma-rəngadha-ngu=ma banana=lhangwa mama ayika akwa nəmi-ngkə+lharrə-Ø=m=dha	3M-this 3M.man REAL.3M>VEG(?)-cut.up-PST=MUT banana=ABL VEG.trunk NEUT.tree and REAL.VEG-?+fall-USP=MUT=TRM	‘The man cut up the banana tree and [it] fell down’	ST, JRB1-029-03, 00.20.42	past	elicitation (video stimuli)
ngkə+lharrə	fall	achievement	ATM	b	y	PFV	x	x	x	x	Narr	past	∅?	V1-∅		n-akəna nenəngkwarba ni-ngkə+lharra-Ø	3M-that 3M.man REAL.3M-?+fall-USP	‘The man fell down’	JL, JRB1-049-01, 00.41.12-00.41.19	past	elicitation (translation task)			JL asked and does that [nakəna nenəngkwarba nəlharra] mean it happened now, or it happened before?’, JL replies ‘happened before’
ngkə+lharrə	fall	achievement	ATM	n	y	PFV	x	t	x	c	BackFore	past	Overlap-PST SoE DiscCon	V0-PST akwa V1-∅	clause chaining	n-akəna nenəngkwarba nə-majuwa-rnə-ma akwa ni-ngkə+lharra-Ø karrawara amamərarra=manja ayika	3M-that 3M.man REAL.3M-walk-PST-MUT and REAL.3M -?+fall-USP above NEUT.branch=LOC NEUT.tree	‘The man was walking along, and he fell on the tree branch’	JL, JRB1-033-01, 00.02.11-00.02.28	past	elicitation (translation task)
ngkə+lharrə	fall	achievement	ATM	n	y	PFV	x	t	x	c	BackFore	past	Overlap-PST SoE DiscCon	V0-PST akena V1-∅		n-akəna nenəngkwarba n-angkarrə-nə=manja, n-aka nenəngkwarba n-aka n-aka nenəngkwarba n-əngkarre-na akena ni-ngkə+lharra-Ø karrawara amamərarra=manja ayika	3M-that 3M.man REAL.3M-run-PST=LOC 3m-this 3M.man 3M-this 3M-this 3M.man REAL.3M-run-PST but REAL.3M-?+fall-USP above NEUT.branch=LOC NEUT.tree	‘When the man was running, he fell on the tree branch’	JL, JRB1-033-01, 00.06.11-00.06.46	past	elicitation (translation task)
ngkə+lharrə	fall	achievement	ATM	n	y	PFV	x	t	x	c	BackFore	past	Overlap-PST SoE DiscCon	V0-PST akena V1-∅		n-angkarrə-nə=manja akena ni-ngkə+lharra-Ø karrawara amamərarra-manja ayika	REAL.3M-run-PST=LOC but REAL.3M-?+fall-USP above NEUT.branch=LOC NEUT.tree	‘When he was running, he fell on the tree branch’	JL, JRB1-033-01, 00.07.00-00.07.14	past	elicitation (translation task)
ngkə+lharrə	fall	achievement	ATM	n	y	PFV	x	x	x	x	Narr	past	∅?	V1-∅		n-angaba nenəngkwarba ni-ngkə+, ni-ngkə+lharra-Ø, ni-ngkə+lharrə-Ø=ma	3M-that.one 3M.man 3M-?+, REAL.3M-?+fall-USP REAL.3M-?+fall-USP=MUT	‘The man fell down’	JL, JRB1-049-01, 00.41.50-00.41.55	past	elicitation (translation task)			In response to being asked ‘if I'm falling down and right now you're saying 'James...’ Then asked for clarification, JL is asked ‘if someone says nəlharra it's- he fell down? he's already on the ground?’ and JL replies ‘he f- he fell down, yeah’
rama-jungwa	get.up	achievement	ATM	n	y	PFV	x	tm	x	c	Narr	past	PstMod + SoE-PST DiscCon-PST	yarrungkwa V-1-PST V0-PST akwa V1-∅ akwa V2-PST		yarrungkwa n-aka nenəngkwarba nə-lhəke-na akwa na-mak+ajey=ma chair=manja akwa na-rama-jungwa-Ø akwa nu-kwa+bijangu-nə=ma	yesterday 3M-that 3M.man REAL.3M-go-PST and REAL.3M-place+be.upright.PST=MUT chair=LOC and REAL.3M-get.up-REFL-USP and REAL.3M-jump-PST=MUT	‘Yesterday the man went and sat in the chair, and then got up and jumped’	CW, JRB1-032-01, 00.33.22	past	elicitation (video stimuli)
wara	rise; get.up	hab achievement	STATE HAB	dna	n	IMPFV	x	x	hi	g	Backgr	past	AspMod Hab	V1-∅ arngkawura ('all the time')	Translation?? 'he slept well as a baby, now sometimes he gets up, sometimes he sleeps'	wurri-yukwujiya wurru-wanki-yukwujiya wurr-angariya wurr-abarda marrnga akən nə-wara-Ø-mə=dha arngkawura nu-mkulha=ma n-akən marrnga	COLL-small COLL-DIM-small COLL-baby COLL-good VEG.sleep NEUT.that REAL.NEUT-get.up-USP=MUT=TRM sometimes REAL.NEUT-sleep.NPST=MUT 3M-that VEG.sleep	‘so when he was a baby he slept all the time, now he's grown he sleeps now and then’	ST, JRB1-037-01, 00:13:59-00:14:19	past	elicitation (video stimuli)
warma-jungwa	rise; get.up; fly.away	achievement	ATM	n	y	PFV	x	tt	x	c	Narr	past	SoE DiscCon-PST	V1-∅ akwa V2-PST akwa V3-PST		wurr-akəna wurru-kwulyubena wurruweba nəw-warma-jungwa-Ø ajurungka=lhangwa akwa na-rak-wulyake-na akwa nə-lhawrradhə-na	COLL-that COLL-pretty COLL.parrot REAL.COLL-fly.away-RELF-USP NEUT.ground=ABL and REAL.COLL-round-go.around-PST and REAL.COLL-return-PST	‘The pretty parrot took off from the ground, flew round and round, and then came back’	JL, JRB1-033-01, 00.16.39-00.17.04	past	elicitation (video stimuli)
ngwurrukbalija	open(something)	accomplishment	Q INCR	closed max	y	PFV	x	t	x	co	ForeBack/Explanation	past	SoE Overlap-PST	V1-∅ V2-PST		n-aka nanəngkwarba nu-ngwurrukbalija-Ø=ma akəna door=a akəna frigereyda n-abəringke-nə=m anhənga	3M-this 3M.man REAL.3M>NEUT-open-USP=MUT NEUT.that NEUT.door=PF NEUT.that NEUT.refrigerator REAL.3M-look.for-PST=MUT NEUT.food	‘The man opened the fridge door, looking for food’	ST, JRB1-037-02, 00:05:13-00:05:23	past	elicitation (video stimuli)
ngwurrukbalija	open(something)	accomplishment	Q INCR	closed max	y	PFV	x	tm	x	co	ForeBack/Explanation	past	PstMod SoE GoalSub-IRR-PST	yarrungkwa V1-∅ V2-IRR-PST=PURP		n-aka nanəngkwarba yarrungkwa nu-ngwurrkablija-Ø=ma akən door=a akən fridge=a kajungwa kən-abərungke-ni=yadh anhənga	3M-that 3M.man yesterday REAL.3M>NEUT-open-USP=MUT NEUT.that NEUT.door=PF NEUT.that NEUT.fridge=PF so.that IRR.3M-look.for-PST=PURP NEUT.food	‘Yesterday the man opened the fridge door, in order to look for food’	ST, JRB1-037-02, 00:05:28-00:05:36	past	elicitation (video stimuli)
ngwurrukbalija	open(something)	accomplishment	Q INCR	closed max	y	PFV	x	t	dir	it lli	Narr	past	AspMod Iter SoE-PST + Overlap-PST	n-ərribərriba (3sg.keep.on) arngkəbəbərnama ('many.time') V1-∅ V2-PST V3-PST V4-∅ V5-PST V6-∅		n-aka nanəngkwarba n-ərribərriba arngkəbəbərnama nu-ngwurrkbalija-Ø-ma akən door akəna fridge-a n-abəringke-nə-m anhənga nə-dhərra-ngə=wanə nu-ngwurrkbalija-Ø=ma nə-dhərra-ngə=wanə nu-ngwurrkbalija-Ø-ma n-ərribərriba arngkəbəbənama	3M-that 3M.man 3M-keep.on all.day REAL.3M>NEUT-open-USP=MUT NEUT.that NEUT.door NEUT.that NEUT.fridge REAL.3M-look.for-PST=MUT NEUT.food REAL.3M>NEUT-close-PST=EMPH? REAL.3M>NEUT-open-USP=MUT REAL.3M>NEUT-close-PST=EMPH? REAL.3M>NEUT-open-USP=MUT 3M-keep.on all.day	‘he opened it and he closed it, he opened it and he closed it, he closed the door, opened it, kept going all day’	ST, JRB1-037-02, 00:05:51-00:06:10	past	elicitation (video stimuli)
ngwurrukbalija	open(something)	iterated accomplishment	PLUR ACC UBD	n	y	PFV?	x	tm	ir	it	Backgr?	past	PstMod AspMod Iter-XTD-PST + RED.Echo	a:::rakbəwiya V1-∅ V2-XTD-PST ('do-ITER')		a:::rakbəwiya n-aka nanəngkwarba nu:::-ngurrkbalija-Ø=m akən fridge=la door=a ni-yen-jama:::-Ø nu-ngurrbalija-Ø=ma ni-dharra-Ø-ma ani nu-ngurrbalija-Ø=ma nganing ni-dharra-Ø=ma arakb-urakbəwiya	XTD.long.ago 3M-that 3M.man REAL.3M>NEUT.XTD-open-USP=MUT NEUT.that NEUT.fridge=LOC NEUT.door=PF REAL.3M-REDUP-do.XTD-PST REAL.3M>NEUT-open-USP=MUT REAL.3M>NEUT-close-USP=MUT ? REAL.3M>NEUT-open-USP=MUT ? REAL.3M>NEUT-close-USP=MUT REDUP-long.ago	‘a long, long time ago the man opened and closed the fridge over and over again’	ST, JRB1-037-02, 00:07:01-00:07:21	past	elicitation (video stimuli)
ngwurrukbalija	open(something)	accomplishment	Q INCR	closed	y	PFV	x	tm	x	c	Narr	past	SoE DiscCon-PST	V1-∅ kina ('then') V2-PST		n-aka nenəngkwarba n-ambijangaja-Ø-ma akəna brijərayda=lhanga door=a kina ni-kamadhə-nə=ma	3M-that 3M.man REAL.3M>NEUT-open-USP=MUT NEUT.that NEUT.refridgerator=POSS NEUT.door=PF then REAL.3M-feel.upset-PST-MUT	‘The man opened the fridge and felt sad’	CW, JRB1-037-02, 00:10:36-00:10:46	past	elicitation (video stimuli)
ngwurrukbalija	open(something)	accomplishment	PLUR ACC BD	dna	y	PFV	x	t	i	cit	Narr	past	IterPred SoE DiscCon-PST	n-ərribərriba ('3M.keep.on') V1-∅ akena V2-PST		n-aka nanəngkwarba n-ərribərriba nu-ngwurrubalija-Ø=m akən door=a akena ni-kamadhə-nə=ma	3M-that 3M.man 3M-keep.on REAL.3M>NEUT-open-USP=MUT NEUT.that NEUT.door=PF then REAL.3M-feel.upset-PST-MUT	‘The man kept on opening the fridge and felt sad’	ST, JRB1-037-02, 00:11:48-00:12:02	past	elicitation (video stimuli)
ngwurrukbalija	open(something)	accomplishment	PLUR ACC BD	dna	y	PFV	x	t	ilr	cit	Narr	past	Matrix-PST >> ObjCl-∅ SoE DiscCon-PST	kamb arakba V-1-XTD-PST biya V0-XTD-PST >> V1-∅ akena V2-PST	akena here = but	kamb arakba ni-yen-jama:::-Ø biya n-aka nanungkwarba neni-bəkədha ni-yen-jama-Ø nungurru- ni-ngiyandha-ngu nu-ngurrbalija-Ø-m akən door akena ni-karradhu-nə=ma	then COMPL.ACT REAL.3M-REDUP-do.XTD-PST and.then 3M.that 3M.man 3M-crazy REAL.3M-REDUP-do.XTD-PST REAL.3M-want-PST REAL.3M>NEUT-open-USP=MUT NEUT.that NEUT.door but 3M-unable.to.do(?)-PST=MUT	‘The man kept on trying to open the fridge door, he was a crazy man, but he wasn’t able to’	ST, JRB1-037-02, 00:12:21-00:12:40	past	elicitation (video stimuli)
ngwurrukbalija	open(something)	accomplishment	Q INCR	closed	y	PFV	x	t	x	p	Narr	past	SoE-PST parataxis	enenuwiya ('now') V-1-NPST ekena V0-PST V1-∅	not a very coherent example? Or speaker 'lapses' into PST as soon as SoE?	enenuwiya akən nə-ngwurrbalij-na=m akəna door=a ekena ni-kamadhə-nə=ma nanəkabə- ənəngudh- nə-ngurrbaliji-Ø=yedha akəna akudhijung door=a akənə=ng brijərayda=dha	now NEUT.that REAL.3M>NEUT-open-NPST=MUT NEUT.that NEUT.door=PF then REAL3M-feel.upset-PST=MUT REAL.3M>NEUT-open-USP=PURP NEUT.that NEUT.door NEUT.door=PF NEUT.that=POSS NEUT.refridgerator=TRM	‘The man opened the door just now and felt upset’	ST, JRB1-037-02, 00:09:55-00:10:23	past	elicitation (video stimuli)
dhərra	shut; close	accomplishment	Q INCR	closed	y	PFV? IMPFV?	x	x	x	x	Narr? Backgr?	present	∅?	V1-∅	Perfective present?	n-akəna nenəngkwarba nə-dhərrə-Ø=ma akəna door=a	3M-that 3M.man REAL.3M>NEUT-shut-USP=MUT NEUT.that NEUT.door=PF	‘The man closes the door’	JL, JRB1-049-01, 00.31.23-00.31.30	present	elicitation (translation task)
dhərra	shut; close	accomplishment	Q INCR	closed	y	PFV? IMPFV?	x	x	x	x	Narr? Backgr?	present	∅?	V1-∅	Perfective present?	n-akəna nenəngkwarba nə-dhərru-Ø=ma akəna door=a	3M-that 3M.man REAL.3M>NEUT-shut-USP=MUT NEUT.that NEUT.door=PF	‘The man closes the door’	JL, JRB1-049-01, 00.30.49-00.30.59	present	elicitation (translation task)
dhərra	shut; close	accomplishment	Q INCR	closed	y	PFV? IMPFV?	x	x	x	x	Narr? Backgr?	present	∅?	V1-∅	Perfective present?	nə-dhədhə-Ø=ma	REAL.3M>NEUT-shut-USP=MUT	‘He closes the door’	JL, JRB1-049-01, 00.31.33-00.31.36	present	elicitation (translation task)
dhərra	shut; close	accomplishment	Q INCR	closed	y	IMPFV	x	x	hi	g	Backgr	present	AspMod Hab/Iter	arngkababərnama ('all.the.time/many.time') V1-∅		n-akəna nenəngkwarba arngkababərnama nə-dhədhə-Ø=ma door=a	3M-that 3M.man always REAL.3M>NEUT-shut-USP=MUT NEUT.door=PF	‘[He’s] shutting the door’	JL, JRB1-049-01, 00.31.54-00.32.14	present	elicitation (translation task)
dhərra	shut; close	hab accomplishment	CUM	dna	y	IMPFV	x	x	hi	g	Backgr	present	AspMod Hab/Iter	arngkababərnama ('always') V1-∅		arngkababərnama n-akəna nenəngkwarba nə-dhədhə-Ø=ma door=a	always 3M-that 3M.man REAL.3M>NEUT-shut-USP=MUT NEUT.door=PF	‘The man is always shutting the door’	JL, JRB1-049-01, 00.33.27-00.33.35	present	elicitation (translation task)
dhərra	shut; close	accomplishment	Q INCR	closed max	y	IMPFV	m	x	x	x	Backgr	present	PrMod	adhənuba V1-∅		n-akəna nenəngkwarba adhənuba nə-dhədhə-Ø=ma door=a akəna door=a	3M-that 3M.man today REAL.3M>NEUT-shut-USP=MUT NEUT.door=PF NEUT.that NEUT.door=PF	‘Today the man is shutting the door’	JL, JRB1-049-01, 00.36.03-00.36.16	present	elicitation (translation task)
dhərra	shut; close	accomplishment							x	x		present				nədhədhanguma, that's past, nədhədhuma, that's now			JL, JRB1-049-01, 00.33.03-00.33.10	present	elicitation (translation task)			JL asked ‘nədhəma door=a, it's present or past?’ JL replies ‘present’. JL then asked ‘can it be past as well, or is it always present?’ JL replies ‘always present, I think’ (JL, JRB1-049-01, 00.34.52-00.35.08)
dhərra	shut; close	accomplishment	Q INCR	closed max	y	PFV	x	tm	ir	it lli	Narr	past	PstMod + IterPred + XTD + SoE parataxis-PST	a:::rakbəwiya XTD-V-1-∅ XTD-V0('do')-RED-PST V1-∅ V-1'-∅ V1'-∅	first lengthening is not LLI; second, unclear; multiple red patterns (incl. Echo RED)	a:::rakbəwiya n-aka nanəngkwarba nu:::-ngurrkbalija-Ø=m akən fridge=la door=a ni-yen-jama:::-Ø nu-ngurrbalija-Ø=ma ni-dharra-Ø-ma ani nu-ngurrbalija-Ø=ma nganing ni-dharra-Ø=ma arakb-urakbəwiya	XTD.long.ago 3M-that 3M.man REAL.3M>NEUT.XTD-open-USP=MUT NEUT.that NEUT.fridge=LOC NEUT.door=PF REAL.3M-REDUP-do.XTD-PST REAL.3M>NEUT-open-USP=MUT REAL.3M>NEUT-close-USP=MUT ? REAL.3M>NEUT-open-USP=MUT ? REAL.3M>NEUT-close-USP=MUT REDUP-long.ago	‘a long, long time ago the man opened and closed the fridge over and over again’	ST, JRB1-037-02, 00:07:01-00:07:21	past	elicitation (video stimuli)
marrakaja	grab; take	achievement	ATM	b	y	PFV	x	x	x	x	Narr	past	∅? (but SoE context)	V1-∅		dhədharrəngka yingi-na-marrakaja-Ø akən amdejika	3F.woman REAL.3F-3M-grab-USP NEUT.that NEUT.thing	The woman grabbed the thing from him	ST, JRB1-037-02, 00:14:39-00:14:45	past	elicitation (video stimuli)
marrakaja	grab; take	achievement	ATM	b	y	PFV	x	m	x	x	Narr	past	PstMod	arakb-ərakbəwiya V1-∅		arakb-ərakbəwiya dh-akəna dhədharrəngka yingə-nə-marrakaja-Ø=ma n-akə nanəngkwarba akən ayika	REDUP-long.ago 3F-that 3F.woman REAL.3F-3M-grab-USP=MUT 3M-that 3M.man NEUT.that NEUT.tree	‘Long time ago the woman grabbed the stick from the man’	ST, JRB1-037-02, 00:16:30-00:16:43	past	elicitation (video stimuli)
marrakaja	grab; take	iterated achievement	PLUR ACC BD	dna	y	PFV	x	t	di	c	Narr	past	AspMod SoE DiscCon-PST	keep.on ngawa (CONT) V-1-∅ angkəbəbərnama ('all day') ankgwabəbənama V0-PST biya V1-∅ keep.on V2-PST ngewa		dh-akən dhədharrəngka dhə-rribərrib ngəw ying-merrəmaja-Ø=ma-m a-md-akən dhumbala angkəbəbərnama biya n-akən nanəngkwarba ankgwabəbənama nu-wilyaka-Ø=m ayika biya dh akən dhədharra yingi-na-marrakaja-Ø=m dh-ərribərrib a-mdh-akən ayik=dha yengi-yenja-Ø=m ngəwa=dha	3F-that 3F.woman 3F-keep.on CONT.ACT REAL.3F-hang.out-USP=MUT-? NEUT-many-that FEM.clothes all.day and.then 3M-that 3M.man all.day REAL.3M-carry-PST=MUT NEUT.tree and.then 3F-that 3F.woman REAL.3F-3M-grab-USP=MUT 3F-keep.on NEUT-many-that NEUT.tree=TRM 3F-do-PST=MUT CONT.ACT=TRM	‘The woman kept on hanging out the clothes all day, and then the man took the stick and the woman grabbed it’	ST, JRB1-037-02, 00:17:13-00:17:31	past	elicitation (video stimuli)
akuma	put	achievement	ATM	b	y	PFV	x	x	x	p	Narr	past	SoE parataxis	V1-∅ V2-∅		narrə-m-akuma-Ø libaliba narrə-m-arungku-wurra-Ø	REAL.3A-VEG-put-USP VEG.canoe REAL.3A-VEG-anchor(?)-throw-USP	‘they left the libaliba and they walked (and) threw out the anchors’	Chasm Island, A3368a Side1, 00:01:11.660 - 00:01:15.035	past	narrative
ngurrkw-arrnga	make.bush.shelter [bush.shelter+cut]	accomplishment	Q INCR	closed max	y	IMPFV	m	x	x	x	Backgr	present	PrMod	adhuwaba V1-∅		adhuwaba n-aka nenəngkwarba nu-ngurrkw-arrnga-Ø amiyerriya	today 3M-that 3M.man REAL.3M-bush.shelter?-cut-USP NEUT.shelter	‘Today he’s making a bush shelter’	JL, JRB1-050-01, 00.26.06-00.26.12	present	elicitation (flash card stimuli)
kwarra	break; break.up	accomplishment	Q INCR	closed max	y	PFV	x	x	x	x	Narr	past	∅	V1-∅		n-akəna nenəngkwarba nu-kwarra-Ø=m ayika saw	3M-that 3M.man REAL.3M>NEUT-break.up-USP=MUT NEUT.tree NEUT.saw	‘The man broke the tree [with a] saw’	CW, JRB1-032-01, 00.07.23	past	elicitation (video stimuli)
errikbə	throw	achievement	ATM	b	y	PFV	x	tm	x	co	BackFore	past	PstMod Overlap-PST SoE DiscCon	V0-PST kembərra V1-∅		n-akəna nanəngkwarba ma-lyinga-Ø m-akən malarra kembərra n-errikbu-Ø-ma	3M-that 3M.man REAL.(3M)>VEG-hold-PST VEG-that VEG.stone then REAL.3M-throw-USP	‘The man was holding the stone and then threw it’	ST, JRB1-037-01, 00:42:52-00:43:01	past	elicitation (video stimuli)
errikbə	throw	achievement	ATM	b	y	PFV	x	tm	x	co	BackFore	past	PstMod Overlap-PST SoE DiscCon	V0-PST akwa V1-∅		n-akəna nenəngkwarba nəm-alyinga-Ø malarra akwa n-errikbu-Ø=ma	3M-that 3M.man REAL.3M>VEG-hold-PST VEG.stone and REAL.3M-throw-USP=MUT	‘The man was holding the stone and he threw it’	CW, JRB1-037-01, 00:43:02-00:43:11	past	elicitation (video stimuli)
errikbə	throw	achievement	ATM	b	y	PFV	x	tm	x	co	BackFore	past	PstMod Overlap-PST SoE DiscCon	yarrungkwa V0-PST V0'-PST akwa V1-∅		yarrungkwa n-aka nanəngkwarba nu-kw-ajey=ma nəm-ayinga-Ø malarra akwa n-errikbu-Ø=ma	yesterday 3M-this 3M.man REAL.3M-half(?)-be.upright.PST=MUT REAL.3M>VEG-hold-PST VEG.stone and REAL.3M-throw-USP=MUT	‘Yesterday the man was standing holding the stone, and threw it’	ST, JRB1-037-01, 00:43:26-00:43:38	past	elicitation (video stimuli)
errikbə	throw	achievement	ATM	b	y	PFV	x	t	x	c	Narr	past	DiscCon SoE DiscCon-PST	akwa arakba V1-∅ V1'-∅ akwa V2-PST		akwa arakba n-errikbə(?)-Ø n-errikbə-Ø akina akwa n-ərrəngka-Ø arakba	and COMPL.ACT REAL.3M>NEUT-throw-USP REAL.3M>NEUT-throw-USP NEUT.that and REAL.3M-look-PST COMPL.ACT	‘and he threw it. He threw it and he saw/watched it (the spear)’	Chasm Island, A3368a Side1, 00:01:28.720 - 00:01:33.075	past	narrative
arungku-wurra	throw.anchor	achievement	ATM	b	y	PFV	x	x	x	p	Narr	past	SoE parataxis	V0-∅ V1-∅		narrə-m-akuma-Ø libaliba narrə-m-arungku-wurra-Ø	REAL.3A-VEG-put-USP VEG.canoe REAL.3A-VEG-anchor(?)-throw-USP	‘they left the libaliba and they walked (and) threw out the anchors’	Chasm Island, A3368a Side1, 00:01:11.660 - 00:01:15.035	past	narrative
nekibulu	give.up	achievement	ATM	b	y	PFV	x	x	x	c	Narr	past	SoE DiscCon	arakbəwiya V0-∅ kemba V1-∅	PC realis!	arakbəwiya n-aka nenəngkwarba nu-njurr-kwa-ja-Ø=ma akəna fridge=a ekena engkəbərrungwərrungwa or kamba ngə-nekibulu-Ø=m akəna	long.ago 3M-this 3M.man REAL.3M>NEUT-move-CAUS-USP=MUT NEUT.that NEUT.fridge=PF but NEUT.heavy then REAL.3M>NEUT(?)-give.up(?)-USP=MUT NEUT.that	Long time ago the man [tried to] move the fridge, but it was too heavy’ / ‘and so he gave up’	JL, JRB1-038-01, 00:14:43-00:15:08	past	elicitation (video stimuli)
nekibulu	give.up	achievement	ATM	b	y	PFV	x	t	x	co	BackFore	past	Overlap-PST SoE DiscCon	arakbəwiya V-1-IRR-PST akwa V0-IRR-∅ ekena V1-∅		arakbəwiya n-aka nenəngkwarba kənu-jura-ng=yedha akwa kənu-njurru-kwa-ji-Ø=yedh akəna fridge=a ekena nə-nekibula-Ø akwa=ba ə-mdh-akeya=wiya	long.ago 3M-that 3M.man IRR.3M>NEUT-push-PST=PURP and IRR.3M>NEUT-move-CAUS-USP=PURP NEUT.that NEUT.fridge=PF but REAL.3M>NEUT(?)-give.up(?)-USP and=EMPH NEUT-many-that(?)=QUANT	‘Long time ago the man was [trying to] push and move the fridge, but he gave up'	JL, JRB1-038-01, 00:16:14-00:16:34	past	elicitation (video stimuli)
jungwa	die	achievement	ATM	b	n	PFV?	x	x	x	x	Narr?	past	∅? (or SoE parataixis?)	V1-∅		ni-jungwa-Ø	REAL.3M-die-USP	‘that man, he died’	JL, JRB1-049-01, 00.46.49-00.47.01	past	elicitation (translation task)
jungwa	die	achievement	ATM	b	n	PFV?	x	x	x	x	Narr?	past	∅? (or SoE parataixis?)	V1-∅		n-akəna nenəngkwarba ni-jungə-Ø=ma, n-akəna nenəngkwarb ni-jungu-Ø=ma	3M-that 3M.man REAL.3M-die-USP=MUT 3M-that 3M.man REAL.3M-die-USP=MUT	‘he passed away’	JL, JRB1-049-01, 00.47.04-00.47.16	past	elicitation (translation task)
akburranga	find; reach	achievement	ATM	b	n	PFV	x	t	x	c	Narr	past	SoE-PST DiscCon	V1-PST akena V2-∅		n-aka nenəngkwarba n-aburəngke-nə=ma akena n-ang-akburranga-Ø	3M-that 3M.man REAL.3M-look.for-PST=MUT but REAL.3M-3F-find-USP	‘The man was looking for her, and he found her’	JL, JRB1-064-01, 00.21.11-00.21.17	past	elicitation (flash card stimuli)
akburranga	find; reach	achievement	ATM	b	n	PFV	x	t	x	c	Narr	past	SoE-PST DiscCon	V1-PST akwa V2-∅		n-akəna nenəngkwarba n-abərengke-nə=ma en=lhangwa warijura akwa nen-akbərranga-Ø	3M-that 3M.man REAL.3M>COLL-look.for-PST=MUT 3M.PRO=POSS COLL.child and REAL.3M>COLL-find-USP	‘The man was looking for his kids, and he found them’	JL, JRB1-034-01, 00.21.57-00.22.13	past	elicitation (translation task)
akburranga	find; reach	achievement	ATM	b	n	PFV	x	t	x	p	Narr	past	SoE-PST parataxis	V0-PST V1-∅		narrə-mirku-warrukwa-Ø narrə-m-akbərranga-Ø m-akəna	REAL.3A-neck-cross-PST REAL.3A-VEG-find-USP VEG-that	‘they crossed (a point of land) and they found/reached [it]’	Chasm Island, A3368a Side1, 00:01:19.965-00:01:22.815	past	narrative
warde	hit; kill	achievement	ATM	b	n	PFV	x	x	x	x	Narr	past	SoE parataxis?	V1-∅		n-akəna nenəngkwarba nenu-warda-Ø, nenu-warda-Ø wurr-aka wurruwarda nenu-warda-Ø wurr-aka wurruwarda	3M-that 3M.man REAL.3M>COLL-hit-USP REAL.3M>COLL-hit-USP COLL-that COLL.dog REAL.3M>COLL-hit-USP COLL-that COLL.dog	‘that man hit the dog’	JL, JRB1-049-01, 00.46.19-00.46.29	past	elicitation (translation task)
kwiyerrba	miss	achievement	ATM	b	n	PFV	x	x	x	x	Narr	past	SoE parataxis?	V1-∅		n-aka nanəngkwarba nu-kwiyerrba-Ø akəna enungkwa	3M-this 3M.man REAL.3M>NEUT-miss-USP NEUT.that NEUT.spear	‘The man missed the spear’	ST, JRB1-051-01, 00.29.44-00.29.50	past	elicitation (flash card stimuli)
kwiyerrba	miss	achievement	ATM	b	n	PFV	x	x	x	x	Narr	past	∅? SoE parataxis?	V1-∅		n-akən James=a nu-kwiyerrba-Ø y-akəna yimendha	3M-that James=PF REAL.3M>MASC-miss-USP MASC-that MASC.turtle	‘James missed the turtle’	ST, JRB1-051-01, 00.30.23-00.30.34	past	elicitation (flash card stimuli)			When asked what ‘nakəna nenəngkwarba nukwiyerrba yakəna yimendha’ means, ST replies ‘that man missed the turtle’. Then asked following up ‘so missed? in the past?’ ST says ‘missed, yeah’.
ngwanja	stop	achievement	ATM	b	n	PFV	x	x	x	lli	Narr	past	SoE DiscCon + XTD	V-1-PST V0-PST biya Npred-XTD V1-∅		wurru-kwala na-jungwee-yi-nə=dha ne-yamin-jamə-na biya yelyukwi::: arrərra nu-ngwanja-Ø	3A-some REAL.3A-die-RECIP-PST=TRM REAL.3M-REDUP-do-PST and.then MASC.rain.XTD NEUT.wind REAL.NEUT-stop-USP	‘(but) some died. until the rain and wind’	Chasm Island (A3368a Side1), 00:03:11.880-00:03:17.458	past	narrative
yedha	arrive	achievement	PREP + ATM	b	y/n	PFV	x	t	x	cc	Narr	past	DiscCon SoE DiscCon-PST	biya V1-∅ arakba (then) V2-PST		biya ni-yadha-Ø nungw-enikba akwa yakwujina arakba nuw-ambilya adhalyuma=manja wurr-akəna=dha	and.then REAL.3M-arrive-USP 3M.father-KIN.3M and there COMPL.ACT REAL.3A-stay.PST NEUT.river=LOC 3A-that=TRM	‘And then his father arrived and they all stayed there at the river’	Kwurrirda Kwurrirda-langwa, A3369a Side1 a3.3	past	narrative
ambarr-nga	stand up	achievement	ATM	b	y	PFV	x	t	x	c	Narr	past	SoE DiscCon-IRR.PST	V-1-∅ akwa V0-∅ akwa kamba V1-∅ V2-∅ V3-IRR-PST	CofS affix +-∅ or did you change your mind? Anin texts is rather: 'he came and sat down, sneezed, then stood up and walked away'	n-akən nanəngkwarba nə-lhəka-Ø=ma n-ambarr-nga=ma akən-manja chair=a akwa nə-mədhilyakbə-Ø-ma akwa kamba nə-kw-aji-nga=ma kənə-lhəka-nə=ma	3M-that 3M.man REAL.3M-go-USP=MUT REAL.3M-sit-CofS=MUT NEUT.that=LOC chair=PF and REAL.3M-cough-USP=MUT and then REAL.3M-half(?)-be.upright-CofS=MUT IRR.3M-go-PST=MUT	‘he stood up, coughed, and walked away’	ST, JRB1-037-01, 00:31:11-00:31:21	past	elicitation (video stimuli)
mədhilyakbə	cough	semelfactive	SEMELF	dna	n	PFV	x	t	x	cc	Narr	past	SoE DiscCon-IRR.PST	V-2-∅ akwa V-1-∅ akwa kamba V0-∅ V1-∅ V2-IRR-PST	CofS affix +-∅ or did you change your mind? Anin texts is rather: 'he came and sat down, sneezed, then stood up and walked away'	n-akən nanəngkwarba nə-lhəka-Ø=ma n-ambarr-nga=ma akən-manja chair=a akwa nə-mədhilyakbə-Ø-ma akwa kamba nə-kw-aji-nga=ma kənə-lhəka-nə=ma	3M-that 3M.man REAL.3M-go-USP=MUT REAL.3M-sit-CofS=MUT NEUT.that=LOC chair=PF and REAL.3M-cough-USP=MUT and then REAL.3M-half(?)-be.upright-CofS=MUT IRR.3M-go-PST=MUT	‘he stood up, coughed, and walked away’	ST, JRB1-037-01, 00:31:11-00:31:21	past	elicitation (video stimuli)
knock-əm-dha	knock	semelfactive	PLUR ACT	dna	y	IMPFV?	x	x	i	c	BackFore + SoE	past	IterMod + Overlap SoE DiscCon	n-ərribərriba ('keep.on') V1-∅ biya V2-∅		n-akən neniyuwangkwa n-ərribərriba nə-knock-əm-dha-Ø-m door-manja biya n-aka nanəngkwarba n-angkarrə-Ø=ma yadhakəna	3M-that 3M.old.man 3M-keep.on REAL.3M>NEUT-knock-TRVSR-BLI-USP=MUT NEUT.door-LOC and.then 3M-that 3m.man REAL.3M-run-USP=MUT that.way	‘The old man kept on knocking on the door, and then the man ran past’	ST, JRB1-037-02, 00:18:49-00:18:57	past	elicitation (video stimuli)
dhakba-jangu	grind; knock [+REFL]	accomplishment	Q INCR	closed max	y	PFV	x	x	x	c	Narr	past	SoE DiscCon	akwa V1-∅	translation suggests 'grind' is in fact an accomplishment verb. So non-culminating readings might be PC (partitive culminations)	akwa na-dhakba-jangu-Ø=ma	and REAL.3M-grind-REFL-USP=MUT	‘and he ground up [the food]’	JL, JRB1-029-03, 00.27.14	past	elicitation (video stimuli)
dhakba-jangu	grind; knock [+REFL]	semelfactive	PLUR ACT	dna	y	PFV?	x	x	i	it	Narr? Backgr?	past	IterPred	V1-∅ ngəwa ('continue') keep.on		n-aka nanəngkwarba na-dhakba-jangu-Ø=m door=man ngəwa n-ərribərrib=dha	3M-that 3M.man REAL.3M-knock-REFL-USP=MUT NEUT.door=LOC CONT.ACT 3M-keep.on=TRM	‘The man kept on knocking on the door’	ST, JRB1-037-02, 00:18:25-00:18:32	past	elicitation (video stimuli)
dhakba-jangu	grind; knock [+REFL]	semelfactive	PLUR ACT	dna		PFV	x	x	i	cit	Narr	past	IterPred + SoE DiscCon	V1-∅ n-ərribərriba (3keep.on) biya V2-∅		n-aka nanəngkwarba n-adhakba-jangu-Ø=ma yerrkam- ayerrka=ma akən=men door=a n-ərribərriba biya n-aka nanəngkwarba n-angkarrə-Ø=m yedhakənaya	3M-that 3M.man REAL.3M-knock-REFL-USP=MUT NEUT.hand=INST NEUT.that=LOC NEUT.door=PF 3M-keep.on and.then 3M-that 3M.man REAL.3M-run-USP=MUT that.way	‘The man kept on knocking with his hand on the door, and then the other man ran past’	ST, JRB1-037-02, 00:19:08-00:19:18	past	elicitation (video stimuli)
dhakba-jangu	grind; knock [+REFL]	semelfactive	PLUR ACT	dna	y	IMPFV	x	tm	x	co	Backgr	past	PstMod SoE DiscCon-PST	adhuwaba V1-∅ biya V2-PST	There is something off in the translation here, given the follow up event in the past. 'adhuwaba' is actually a recent past	n-aka nanəngkwarba adhuwaba nə-dhakba-jang-Ø=m akən=man door=a biya n-akən nu-wilyab nanəngkwarba edhəkəna nə-majuwa-nə=ma	3M-this 3M.man today REAL.3M-knock-REFL-USP=MUT NEUT.that=LOC NEUT.door=PF and.then 3M-that 3M-one 3M.man that.way REAL.3M-walk-PST=MUT	‘Today the man was knocking on the door, and then the other man walked past’	ST, JRB1-037-02, 00:19:27-00:19:35	past	elicitation (video stimuli)
dhakba-jangu	grind; knock [+REFL]	semelfactive	PLUR ACT	dna	y	IMPFV	x	m	hi	cit	Backgr	past	PstMod Iter/HabPred	a:::rakbəwiya n-ərribərriba ('3M-keep.on) V1-∅ biya V2-∅	not LLI?	n-aka nanəngkwarb a:::rakbəwiya n-ərribərriba n-adhakba-ja-Ø=m door=manja biya nanga wurr-akəna warnmamalya ambəlyuma aləlbaj akən=manj angalya n-angkarrə-Ø=m yedhakəna	3M-that 3M.man XTD.long.ago 3M-keep.on REAL.3M-knock-REFL-USP=MUT NEUT.door=LOC and.then ? 3A-that 3A.person NEUT.two ? NEUT.that=LOC NEUT.place REAL.3M-run-USP=MUT that.way	‘A long time ago the man used to keep knocking on the door and then the other man ran that way’	ST, JRB1-037-02, 00:19:55-00:20:07	past	elicitation (video stimuli)
lyumadhə	disappear	achievement	ATM	b	n	PFV	x	x	x	x	Narr	past	SoE parataxis?	V1-∅		yarrungkwa n-akəna nenəngkwarba ni-lyumadhə-Ø=ma	yesterday 3M-that 3M.man REAL.3M-disappear-USP=MUT	‘He disappeared’	JL, JRB1-050-01, 00.27.52-00.27.59	past	elicitation (flash card stimuli)
dhəka-junga	be.closed [+REFL]	state	CUM	dna	n	IMPFV	x	x	x	c	Backgr	present	TempShift DiscCon	V0-PST akwa V1-∅		akəna door=a na-ngwudhangmə-nə=ma akwa na-dhəka-jung-Ø=ma	NEUT.that NEUT.door=PF NEUT-be.open-PST=MUT and REAL.NEUT-close-REFL-USP=MUT	‘The door was open, and [now] it’s closed’	JL, JRB1-023-01, 00.01.25-00.01.37	present	elicitation (video stimuli)
kukwangba	be.excited; get.excited	state	CUM	dna (open relative)	n	IMPFV	x	x	x	x	Backgr	present	∅	V1-∅		“nə-kukwangba-Ø=mərra y-aka yimarndakuwaba. nungkwa=lhangwa”	REAL.3M-be.excited-USP=MUT MASC-that MASC.blue.tonged.lizard 2.PRO=POSS	“He is so excited about this blue-tongued lizard. It's yours!”	Kwurrirda Kwurrirda-langwa, A3369a Side1 a3.3	present	narrative
walyuwu	be.cooked; get.cooked; be.ripe; get.ripe	state/CofS	ATM	closed max	n	PFV	x	x	x	c	Narr	past	DiscCon+XTD SoE	bi:::ya V1-∅		bi:::ya nu-walyuwu-Ø-manji=kba=dha, y-akina yimarndakuwaba y-inumalye=ka=dangba	and.then.TXD REAL.3M-be.cooked-USP=LOC=DENIZ=TRM MASC-that MASC.blue.tonged.lizard MASC-good?=EMPH=EMPH	‘When at last that blue-tongued lizard was cooked to perfection, it was the fattiest, juiciest blue-tongued lizard that ever was’	Kwurrirda Kwurrirda-langwa, A3369a Side1 a3.3	past	narrative
ngkə+lharrə	fall	achievement	ATM	b	n	PFV	x	x	x	x	Argu Epist	past	EpistMod	dhukwa V1-∅		dhukwa ne-ngkə+lharra-Ø dhukwa nara akənə=wa dhu nəw-kw-ajiya	maybe REAL.NEUT-?+fall-Ø maybe NEG NEUT.that=ALL maybe REAL.NEUT-half(?)-be.upright.NPST	‘Maybe the tree fell down, maybe it didn’t, maybe it’s still standing’	JL, JRB1-042-01, 00:15:35-00:15:59	past	elicitation (translation task)		epistemic
yakwabijə	forget	achievement	ATM	b	n	PFV	x	x	x	x	Argu Epist	past	EpistMod	dhukwa V1-∅		dhukwa ni-yakwabijə-Ø=ma ngalhanga dh-adhə-m-ikirra	maybe REAL.3M-forget-USP=MUT 3F.PRO.POSS 3F-F-INALP-name	‘he probably forgot her name’	anin2_pw_au_004, in van Egmond 2012: 232	past	elicitation (translation task)		epistemic
yedha	arrive	achievement	ATM	b	n	PERF	x	x	x	r	Argu Epist	past>present	EpistMod PerfMod	dhukwa arakba V1-∅		dhukwa arakb ni-yedha-Ø-m=dha ni-yedha-nga	maybe COMPL.ACT REAL.3M-arrive-USP=MUT=TRM REAL.3M-arrive-PST	‘Maybe he already arrived’	JL, JRB1-042-01, 00:11:26-00:11:42	past	elicitation (translation task)		epistemic
ngkə+lharrə	fall	achievement	ATM	b	n	PERF	x	x	x	r	Argu Epist	past>present	PerfMod	abad ('already') V1-∅		akəna eyika ebina ngaya ngu-lung+kwabija-Ø=ma dhukwa arakba akəna enuwə- enungkuraba akwa a-warnk-amiyerra nuw-ambilyu=m=ba biya yakwujina dhuk enukurab akən abab dhuku ne-ngkə+larra-Ø ajurungku=dha	NEUT.that NEUT.tree NEUT.that.same 1.PRO REAL.1-grow-USP=MUT maybe COMPL.ACT NEUT.that NEUT.old and NEUT-DIM-long.time REAL.NEUT-stay.PST=MUT=EMPH and.then there maybe NEUT.old NEUT.that COMPL.ACT maybe REAL.NEUT-?+fall-USP NEUT.ground=TRM	‘The tree grew already, maybe it’s already old, maybe it fell down to the ground’	JL, JRB1-042-01, 00:14:38-00:14:56	past	elicitation (translation task)		epistemic
lung+kwabija	grow; plant	accomplishment	I INCR	closed max	n	PERF	x	x	x	r	Perf context	past>present	∅ PerfectMod	V1-∅ < arakba PROP		akəna eyika ebina ngaya ngu-lung+kwabija-Ø=ma dhukwa arakba akəna enuwə- enungkuraba akwa a-warnk-amiyerra nuw-ambilyu=m=ba biya yakwujina dhuk enukurab akən abab dhuku ne-ngkə+larra-Ø ajurungku=dha	NEUT.that NEUT.tree NEUT.that.same 1.PRO REAL.1-grow-USP=MUT maybe COMPL.ACT NEUT.that NEUT.old and NEUT-DIM-long.time REAL.NEUT-stay.PST=MUT=EMPH and.then there maybe NEUT.old NEUT.that COMPL.ACT maybe REAL.NEUT-?+fall-USP NEUT.ground=TRM	‘The tree grew already, maybe it’s already old, maybe it fell down to the ground’	JL, JRB1-042-01, 00:14:38-00:14:56	present	elicitation (translation task)
errikbə	throw	achievement	ATM	b	n	PFV	x	x	x	c	Narr	past	SoE DiscCon	V1-∅ akena V2-∅		n-aka nenəngkwarba n-errikbi-Ø=yedha akəna dart ekena nu-kwiyarrba-Ø	3M-that 3M.man REAL.3M-throw-USP=PURP NEUT.that NEUT.dart but REAL.3M-miss-USP	‘He threw the dart, but missed’	JL, JRB1-075-01, 00:13:52.495-00:13:58.895	past	elicitation (translation task)
kwiyerrba	miss	achievement	ATM	b	n	PFV	x	x	x	c	Narr	past	DiscCon SoE	V0-∅ akena V1-∅		n-aka nenəngkwarba n-errikbi-Ø=yedha akəna dart ekena nu-kwiyarrba-Ø	3M-that 3M.man REAL.3M-throw-USP=PURP NEUT.that NEUT.dart but REAL.3M-miss-USP	‘He threw the dart, but missed’	JL, JRB1-075-01, 00:13:52.495-00:13:58.895	past	elicitation (translation task)
enibu-dhə	be.alive; become.alive	state/CofS	ATM	b	n	PERF	x	x	x	cr	Perf context	past>present	PerfMod Matrix-∅(PERF) >> ObjCl	arakba V0-∅ >> V1-∅ ('now' + result)	you have seen that I have become alive again'	yirrə-rrəngka-Ø=ma arakba ngayuwa nəng-enibu-dhə-Ø=ma amandhangwa nəngi-jungwu-Ø=mərra=dha	REAL.2A-see-PST=MUT COMPL.ACT 1.PRO REAL.1-alive-INCH-USP=MUT true REAL.1-die-USP=MUT=TRM	‘Now you have seen that I really am alive again [it’s true that I died before]’	Bible Society in Australia 1992: 890	present	narrative (text translation)
jungwa	die	achievement	ATM	b	n	PERF	x	x	x	cr	Perf context	past>present	PerfMod Matrix-∅(PERF) >> ObjCl	arakba V0-∅ >> V1-∅	inceptive/achievement reading of perception V	yirrə-rrəngka-Ø=ma arakba ngayuwa nəng-enibu-dhə-Ø=ma amandhangwa nəngi-jungwu-Ø=mərra=dha	REAL.2A-see-PST=MUT COMPL.ACT 1.PRO REAL.1-alive-INCH-USP=DEP true REAL.1-die-USP=MUT=TRM	‘Now you have seen that I really am alive again [it’s true that I died before]’	Bible Society in Australia 1992: 890	present	narrative (text translation)
yakwurra	be.thirsty; get.thirsty	CofS	ATM	b	n	PFV	x	m	x	x	Narr	past	PstMod	V1-∅ alyarrəngwalyilya ('that night')		ni-yakwurra-Ø n-akəna akungwa alyarrəngwalyilya	REAL.3M-be.thirsty-USP 3M-that NEUT.water NEUT.night	‘He got thirsty [for water] during the night’	Stokes n.d.-b: 26	past	elicitation (translation task)
jungwa	die	achievement	ATM	b	y	PFV	x	x	x	c	Narr	past	DiscCon SoE	akena V1-∅		akena n-enəng-arijira=ma ngəwa ni-jungwu-Ø=ma en-ejə-kwaba n-akəna	however 3M-M.ALP-child=PRIV CONT.ACT REAL.3M-die-USP=MUT 3m.PRO-CofR-also 3M-that	‘But he died too, without having any children’	Bible Society in Australia 1992: 822	past	narrative (text translation)
angmadhə	steal	achievement	ATM GROUP	dna	y	PFV	x	t	x	x	Narr	past	Matrix-PST >> ObjCl-∅	V0-PST >> V1-∅		nara ka-rrəngka-Ø wurr-enjarrngalyilya nuw-angmadhə-Ø=mərrə=mərra nganyangwa diraka	NEG IRR.1>3A-see-PST 3A-boy REAL.3A>NEUT-steal-USP=DEP=PROP 1.PRO.POSS NEUT.car	‘I didn’t see the boys who stole my car’	Stokes n.d.-b: 97	past	elicitation (translation task)
anga	bite	achievement	ATM GROUP	dna	y	PFV	x	x	x	cons	BackFore / Explanation	past	Matrix-PR >> V-∅=ABL (= because)	V0-NPST >> V1-∅=ABL		na-rrangkuwangə-na=ma ayarrka dhəmərrmara ng-anga-Ø=mərrə=lhangwa	REAL.NEUT-swell-NPST=MUT NEUT.hand FEM.sandfly REAL.FEM>1-bite-PST=DEP=ABL	‘My hand is swelling up because the sandflies bit me’	Stokes n.d.-b: 117	past	elicitation (translation task)
lhawurradhə	return	bounded iteration of achievement	PLUR ACT MAX	dna	y	PFV	x	x	x	pit	Narr	past	SoE-RED parataxis	V1-RED-∅ V2-∅		na-lhawu-lhawurradh-Ø, nuw-angkarra-Ø	REAL.NEUT-REDUP-return-USP REAL.NEUT-run-USP	‘It [the mother cat] kept going back, it ran off’	GL, A3369a Side 1 a3.4, Bujikeda ‘Mother cat’, 00.07.28-00.07.32	past	narrative
angkarrə	run	inchoative activity = achievement	ATM	b	y	PFV	x	x	x	p	Narr	past	SoE-RED parataxis	V0-RED-∅ V1-∅		na-lhawu-lhawurradh-Ø, nuw-angkarra-Ø	REAL.NEUT-REDUP-return-USP REAL.NEUT-run-USP	‘It [the mother cat] kept going back, it ran off’	GL, A3369a Side 1 a3.4, Bujikeda ‘Mother cat’, 00.07.28-00.07.32	past	narrative
yedha	arrive	achievement	ATM	b	n	PFV	x	x	d	cons	Narr	past	SoE AspMod	V1-∅ wərənjabə=wiya ('after a quick time')		ni-yedha-Ø yakwuju wərənjabə=wiya	REAL.3M-arrive-USP there quickly=QUANT	‘He got there quick’	JL, JRB1-082-02, 00:16:21.559-00:16:26.409	past	elicitation (translation task)
lharruwura-dha	be.late.afternoon; become.late.afternoon	CofS	ATM	b	n	PFV	x	x	x	c	Narr	past	SoE DiscCon	biya V1-∅	non ambiguous because of biya	biya na-lharruwura-dha-Ø arakba	and.then REAL.NEUT-afternoon-INCH-USP COMPL.ACT	‘It was late afternoon’ [i.e. it had already become late afternoon]	Bible Society in Australia 1992: 174	past	narrative (text translation)
lharruwura-dha	be.late.afternoon; become.late.afternoon	CofS	ATM	b	n	PFV	x	x	x	c	Narr	past	DiscCon SoE	kembirra V1-∅		kembirra na-lharruwura-dha-Ø arakba	then REAL.NEUT-afternoon-INCH-USP COMPL.ACT	‘Afternoon came’ [and then the sun began to set]	Bible Society in Australia 1992: 624	past	narrative (text translation)
lharrumur-dha	become.dark	CofS	ATM	b	n	PFV	x	m	d	cons	Narr	past	PstMod+AspMod	wurdarriya+wiya ('until morning') V1-∅	possibly lexified INCH?	na-lharrumurdha-Ø nenə-mungkwulha wurdarriya+wiya	REAL.NEUT-dark-PST REAL.3M.DU-sleep.PST morning+QUANT	‘It became dark and they slept until morning’	Bible Society in Australia 1992: 502	past	narrative (text translation)
enibu-dhə	be.alive; become.alive	CofS	ATM	b	n	PFV	x	x	x	x	Narr	past	SoE parataxis?	V1-∅		n-eniba-dhə-Ø=ma	REAL.3M-alive-INCH-USP=MUT	‘He came back to life’	JL, JRB1-077-01, 00:44:54.310-00:44:57.730	past	elicitation (translation task)
wangkwa-dhə	become.old	CofS	ATM	b	n	PFV	x	x	x	x	Narr	past	SoE parataxis?	V1-∅		n-eni-wangkwa-dhə-Ø=ma	REAL.3M-M-man-INCH-USP=MUT	‘He became an old man’ [speaker translation]	JL, JRB1-077-02, 00:03:31.138-00:03:34.828	past	elicitation (translation task)
wara	refuse.to	neg.state	CUM	dna	?	IMPFV	x	t	x	p	BackFore (Explanation) + V-PST	past	Overlap-PST SoE parataxis	V1-∅ V2-PST		yingu-wara-Ø raja, nanga-kwa-Ø anhənga angakəna-mərriya yilyakwa, yimumarnda ying-ayiji-na nenga-beka-ju-wa cup=mərra tea yingu-bekə-na, neni-yemin-jema-Ø nen-amb-ambilyu:::=wa, nenu-mungkwula	REAL.3F-refuse.to-USP NEUT.rice REAL.3M>3F-give-PST NEUT.food whats.it.called-the.rest MASC.sugarbag MASC.freshwater.turtle REAL.3F-stand-PST REAL.3M>3F-drink-CAUS-PST NEUT.cup=INST NEUT.tea REAL.3F-drink-PST REAL.3M.DU-REDUP-do-PST REAL.3M.DU-REDUP-stay.PST.XTD=PL REAL.3M.DU-sleep.PST	‘She didn’t want it [the rice] and so he gave her the food and the sugarbag and water turtles and she ate it and gave her a cup of tea and she drank the tea. They both kept on staying there and both went to sleep’	BB, A3370a Side1, a5.8 Diyaburaka-langwa	past	narrative
akburranga	find; reach	achievement	ATM	b	n	PFV	x	m	x	x	Narr	past	PstMod	yarrungkwa V1-∅		yarrungkwa n-akən nenəngkwarrba nəm-akbərranga-Ø=ma mijiyelya	yesterday 3M-that 3M.man REAL.3M>VEG-find-USP=MUT VEG.beach	‘Yesterday he found the beach’	JL, JRB1-018-01, 00.05.31	past	elicitation (translation task)
jungwa	die	achievement	ATM	b	n	PERF	i	m	x	cr	Argu Deon	past>present	PerfMod	V1-∅ arakba ('now that…') V2-NPST		“ni-jungwu-Ø=ma arakba naw-ena, əmba Ø-lhəka-ja arakba dh-ibinu=wa dhadhingiy-enikba jeyi	REAL.3M-die-USP=MUT COMPL.ACT 3M.brother-2.KIN but DEON.2-go-NPST COMPL.ACT 3F-that.same=ALL 3F.wife-3M.KIN go!	“Now that your brother has died, go to his widow”	Bible Society in Australia 1992: 312	past	narrative (text translation)
lhəkəraka	build.something	accomplishment	Q INCR	closed max	y	IMPFV	m	x	x	x	Narr	present	PrMod	enenuwiya ('now') V1-∅	Strange rendering. Like a present perfective..	enenu+wiya n-aka nenəngkwarba nə-lhəkəraka-Ø alhəkəra	now+QUANT 3M-this 3M.man REAL.3M>NEUT-build-USP NEUT.house	‘That man builds a house’	JL, JRB1-060-02, 00.00.22-00.00.31	present	elicitation (flash card stimuli)
lhəkəraka	build.something	accomplishment	Q INCR	closed max	y	PFV	x	m	x	x	Narr	past	PstMod	yarrungkwa V1-∅		yarrungkwa n-akəna nenəngkwarba nə-lhəkəraka-Ø alhəkəra	yesterday 3M-that 3M.man REAL.3M>NEUT-build-USP NEUT.house	‘Yesterday that man built a house’	JL, JRB1-060-02, 00.01.33-00.01.38	past	elicitation (flash card stimuli)
mureye	be.hungry	Unbounded CoS	CUM SCAL	open relative	n	IMPFV	x	x	x	x	Backgr	present	∅	V1-∅	Cofs root in fact	abərruwa narra-mərndakə-murey-mureya-Ø	3A.PRO REAL.3A-many-REDUP-be.hungry-USP	‘They getting [really] hungry’	JL, fieldnotes, 19/11/2018	present	elicitation (translation task)
lhəka	go	iterated achievement	PLUR ACH BD	dna	n	PFV	x	x	x	it	Narr	past	SoE parataxis?	ngaringka V1-∅ V1-∅		ngaringka yingə-lhəka-Ø yingə-lhəka-Ø	again REAL.3F-go-USP REAL.3F-go-USP	‘She kept on going’	Stokes 1971: 31	past	elicitation (translation task)
lyumadhə	disappear	achievement	ATM	b	n	PFV	x	t	l	lli	Narr	past	XTD-RED-PST < SoE	V0-RED-PST:::=wa V1-∅		nanga-lhuku-lhukwa-mərrkaju-wa dh-adhə-m-alhəka=lhangwiyu:::=wa yingə-lhəkarrkə-lyəmadha-Ø	REAL.3M>3F-REDUP-tracks-follow-PST 3F-F-INALP-foot=PERL.XTD=PL 3F-tracks-disappear-USP	‘He kept following her tracks until they disappeared’	GL, A3374a Side2, a11.2 Search	past	narrative
akburranga	find; reach	achievement	ATM GROUP	b	n	PFV	x	t	l	lli	Narr	past	XTD-PST AspMod < SoE	V0-PST:::=wa V1-∅		na-lhəke-nə-ma=ka wurr-akənu:::=wa, yandha+lhangwa narr-akburranga-Ø ebina angalya Kenina	REAL.3A-go-PST=MUT=EMPH 3A-that.XTD=PL until REAL.3A-reach-USP NEUT.this NEUT.place place.name	‘They went on and on, until they reached Canaan’	Bible Society in Australia 1992: 187	past	narrative (text translation)
angkarrə	run	activity max	CUM MAX	b	y	PFV	x	x	dil	lli	Narr	past	XTD-SoE AspMod	V1-∅:::=wa V2-∅		yingi-rukwulyaka-Ø ying-angkarru-Ø:::=wa, ying-arjiyi-nga akuwabijina awurukwa	REAL.3F-go.around-PST REAL.3F-fly-Ø.XTD=PL REAL.3F-stand-CofS beside NEUT.billabong	‘She flew down and circled round and round (until) she was standing at the edge of the billabong’	GL, A3369a Side1, a3.7 Nimimba-langwa akwa nenikuwenikba-langwa ‘The blind man’	past	narrative
kwa+bijanga	jump	achievement	ATM	b	n	PFV	x	t	l	lli	Narr	past	XTD-PST AspMod < SoE	V0-PST:::=wa V1-∅		n-angkarrə-nə-mərru:::=wa, nu-kwa+bijanga-Ø ayika=manja	REAL.3M-run-PST=MUT.XTD=PL REAL.3M-jump-USP NEUT.tree=LOC	‘He kept on running (until) he jumped behind a tree’	GL, A3369a Side1, a3.3 Kwurrirda Kwurrirda	past	narrative
akuma	put	achievement	ATM GROUP	b	n	PFV	x	x	x	c	Narr	past	DisCon SoE DiscCon	ngarningka V0-PST biya V1-∅	non-atomic because of 5	ngarningka nə-lbu-lburra-nga ngəwa biya, amangbalha n-akuma-Ø	again REAL.3M-REDUP-split-PST continue and.then NEUT.five REAL.3M>NEUT-put-USP	Again he (chopped down a tree and) split it and made another five (spear shafts)	AA, A3369a Side2, a3.11 Yingarna-langwa ‘Story about a snake’	past	narrative
aburiya	be.stuck	state	CUM	n	n	IMPFV	x	x	x	c	Backgr	past	DiscCon TempShift	arakba V1-∅		arakba wurri-rn-dhirnd-arrngwa iya wurr-akəna wurru-ngwu-ngw-arrngwa na-wurrak-aburiya-Ø arakba arrawu=wa	COMPL.ACT 3A.REDUP(?)-mother-3A.KIN and 3A-that 3A-REDUP(?)-father-3A.KIN REAL.3A-many-be.stuck-USP COMPL.ACT underneath=ALL	‘their mothers and fathers were stuck in the ground’	JL, A3369b Side1, a4.2 Jigagwa-langwa-langwa daburradikba akwulyangburarrka ‘Her daughter’s dream’	past	narrative
wurra	throw	achievement	ATM	b	y	PFV	x	x	x	x	Narr	past	SoE parataxis?	V1-∅		malamukwa=wiya numa-wurra-Ø arrawa=lhangwa əmba nara n-ibina nenumamalya	VEG.dugout.canoe=QUANT REAL.3M>VEG-throw.away-USP inside=ABL but NEG 3M-this 3M.person	‘But he only threw out the canoe from underneath, he wasn't there’	JL, A3369b Side1, a4.4 Malamukwa-langwa ‘About canoe accident’	past	narrative
yengbə	talk, say	achievement	ATM	dna	y	PFV	x	t	x	c	Narr	past	PST-SoE DiscCon	V-1-IRR.PST akena V0-∅ akwa V1-∅	Avertive; 'was going/about to leave' might be closer to the mark	nganyangwa nabə-rraka kənə-lhəka-rni=yedha akena enlhangwa nenmamalya n-angkarr-Ø angaluba dirak=uma akwa ni-yama-Ø ni-yengba-Ø nenu-maka-Ø nungkuwa Ø-ambilya nara a-lhəka-ma	1.PRO.POSS 3M.son-1.KIN IRR.3M-go-PST=PURP but 3M.PRO.POSS 3M.person REAL.3M-run-USP from.over.there VEG.car=INST and REAL.3M-speak-USP REAL.3M-talk-USP REAL.3M>3M-say-USP 2.PRO DEON.2-stay.NPST NEG NEG.NPST-go-NEG.NPST	‘My son nearly left, however a man came from over there in a car and told him “stay, don’t go”’	JL, JRB1-075-01, 00:10:40.510-00:11:02.885	past	elicitation (translation task)
angkarrə	run	achievement	ATM	b	y	PFV	x	t	x	cc	BackFore + SoE	past	PST-SoE DiscCon	V0-IRR.PST akena V1-∅ akwa V2-∅	Avertive; 'was going/about to leave' might be closer to the mark	nganyangwa nabə-rraka kənə-lhəka-rni=yedha akena enlhangwa nenmamalya n-angkarr-Ø angaluba dirak=uma akwa ni-yama-Ø ni-yengba-Ø nenu-maka-Ø nungkuwa Ø-ambilya nara a-lhəka-ma	1.PRO.POSS 3M.son-1.KIN IRR.3M-go-PST=PURP but 3M.PRO.POSS 3M.person REAL.3M-run-USP from.over.there VEG.car=INST and REAL.3M-speak-USP REAL.3M-talk-USP REAL.3M>3M-say-USP 2.PRO DEON.2-stay.NPST NEG NEG.NPST-go-NEG.NPST	‘My son nearly left, however a man came from over there in a car and told him “stay, don’t go”’	JL, JRB1-075-01, 00:10:40.510-00:11:02.885	past	elicitation (translation task)
ngərraja	argue.about	activity	CUM MAX	n	y	PFV	x	t	d	p	Narr	past	AspMod.DiscCon-PST SoE	adhənuba=wiya ('after a short time') V0-PST V1-∅ V2(=V1)-∅	Re-iteration/reformulaiton of PST V	adhənuba=wiya wurrəng-alhəkina Wakaba akwa Dangmiyala narrəngi-be-yi-na narra-lhərrakə-ngərraja-Ø, nenənga-ngərraja-Ø Stella n-akəna=lhangwa Nenungwanjirrumiya=lhangwa dhadhingiy-enikba	soon=QUANT 3F.DU-those.two Wakaba and Dangmiyala REAL.3F.DU-argue-RECIP-PST REAL.3F.DU>3A-internal.organs(?)-argue.about-USP REAL.3F.DU>3A-argue.about-USP Stella 3M-that=POSS Nenungwanjirrumiya=POSS 3F.wife-3M.KIN	‘At first Wakaba and Dangmiyala had an argument, they both argued over them two, they argued over Stella the wife of Nenungwanjirrumiya’	Akingambaja-langwa [=About Washing Ceremony], A3370a SIDE1 a5.3	past	narrative
ngambaja	curse(someone/something)	achievement	ATM	b	y	PFV	x	t	ld	c lli	Narr	past	DiscCon-XTD-PST SoE	V0-PST biya:::V1-∅ V2-PST	V0-PST bi:::ya V1-∅	ying-engkəngkərre-na ngalhamba=lhangwa akəna=murradha dh-akəna Wakaba bi:::ya, ngalamba=lhangwa arakba yingənə-ngambaja-Ø dh-akəna yingən-ararika-Ø dhambulu=ma n-akəna	REAL.3F-think-PST 3F.PRO.SEQ=POSS NEUT.that=EMPH 3F-that Wakaba and.then.XTD 3F.PRO.SEQ=POSS COMPL.ACT REAL.3F>3M-curse-USP 3F-that REAL.3F>3M-tie.up-PST NEUT.feather.string=EMPH 3M-that	‘Then Wakaba kept on thinking, then it was her turn, she cursed Nenungwanjirrumiya, she cursed him to the feather string and that feather string had been tied all around him’	Akingambaja-langwa [=About Washing Ceremony], A3370a SIDE1 a5.3	past	narrative
larrka	send	achievement	ATM	b	y	PFV	x	x	x	x	Narr	past	SoE (parataxis?)	V1-∅	ABL plays a role?	narri-larrka-Ø angaluba ayakwa Umbakumba=lhangwa	REAL.3A>NEUT-send-USP from.there NEUT.language Umbakumba=ABL	‘Then from Umbakamba the people send a message from there’	Akingambaja-langwa [=About Washing Ceremony], A3370a SIDE1 a5.3	past	narrative
jelalu	hang; hang.out; hang.down	state	CUM	n	n	IMPFV	x	t	x	x	Backgr	past	Rel -PST	Rel:V0-PST V1-∅	akwa V1-∅	akəne=ka dhambula yirr-andheyu=ma nena-ka-rarika-Ø=me=ka memurruma=lhangwa akwa angerriba nenumamalyu=wa na-murndaka-jelalu-Ø=ma	NEUT.that=EMPH NEUT.feather.string REAL.1A-look.for.PST=MUT REAL.3M.DU(?)>NEUT-NSR-tie.up-PST=MUT=EMPH VEG.back.of.neck=ABL and to.there 3M.people=ALL REAL.COLL-many-hang.out-USP=MUT	‘That feather string that we saw had been all tied around from his neck and down to his body, they were all hanging down’	Akingambaja-langwa [=About Washing Ceremony], A3370a SIDE1 a5.3	past	narrative
akburranga	find; reach	achievement	ATM GROUP	b	y	PFV	x	x	x	c	Narr	past	SoE DiscCon	biya V1-∅		biya Nabali=lhangwa=manja angalya nen-akburranga-Ø	and.then Nabali=POSS=LOC NEUT.place REAL.3A>3M-find-USP	‘Then at Nabali's place they all found him’	Akingambaja-langwa [=About Washing Ceremony], A3370a SIDE1 a5.3	past	narrative
rriya-dha	be.sulky; get.sulky	CofS	INCH STATE	b	n	PFV	x	x	x	c	Narr	past	SoE DiscCon	biya V1-∅	Fore on previous V ; not clear if subject starts sulking then or not	biya enamba=lhangwa Arrama ni-lyangi-rriya-dha-Ø	and.then 3M.PRO.SEQ=POSS Arrama REAL.3M-head-bad-INCH-USP	‘Then it was Arrama's turn, he was sulky’	Akingambaja-langwa [=About Washing Ceremony], A3370a SIDE1 a5.3	past	narrative
ngərraja	argue.about	activity max	CUM MAX	b	y	PFV	x	tm	d	p	Narr	past	AspMod.DiscCon-IRR.PST SoE parataxis (> DiscCon)	adhənuba ('soon') V-2-IRR-PST(AVERT) V-1-IRR-PST V0-PST V1-∅ V2-PST V3-PST	ongoing argument presented as at once averted and ongoing => unfinished argument?	yakwujine=ka adhənuba ka-wardi-yi-nə=ma wurr-akəna akəna karri-ngirra-ju-wa=ma, narri-ngərrajə-Ø=ma dhambula akəna narr-arriyaka-Ø=ma akəna ne-yama-Ø wurru-wurr-akuwarra ka-wardi-yi-nə=me=ka adhənuba akəna yanda ngawa narra-yangki-yangk-arringa-rna	there=EMPH soon IRR.3A-hit-RECIP-PST=MUT COLL-that NEUT.that IRR.3A-argue.about-CAUS-PST=MUT REAL.3A-argue.about-USP=MUT FEM.feather.string NEUT.that REAL.3A-make.mistake-PST=MUT NEUT.that REAL.3A-say-PST 3A-REDUP-half IRR.3A-hit-RECIP-PST=MUT=EMPH soon NEUT.that only CONT.ACT REAL.3A-REDUP-voice-break-PST	‘Soon they were just about to fight over the feather string, they were arguing over it, they all said some made a mistake and half of the people nearly had a fight but some of the people had stopped them’	Akingambaja-langwa [=About Washing Ceremony], A3370a SIDE1 a5.3	past	narrative
List of abbreviations
Verb root	Verb root gloss	Aktionsart	Complexity	Scalarity	Control	Viewpoint	Overt PR marking	Overt past tx clause	Aspect quantifcation	Temporal succession	Structural context		TA context	Overt TA pattern
			CUM: cumulative	b: binary	y : yes	IMPF: imperfective	m: modifier	t : tnflectton	h: habitual	p: parataxis	Narr : Narration		PST prompt = past prompt	V1 : annotated verb
			PLUR ACT: pluractional	n: none	no : no	PFV perfective	x: no	m : modtfter	i: iterative (reduplication)	x: unspecified	Backgrd: Background		SoE = sequence of event content	V2, V3... : following verbs
			ATM: atomic	closed max: closed scale with maximal standard of comparison		IMPF/PFV = ambiguous	i: PR inflection on matrix clause / clause chain	x : unspectfted	d: durative	o: overlap (multiple events)	ForeBack: Bacgrd Backwards		DiscCon : discourse connective	…, V-1, V0 : previous verb
			AMT PREP: atomic with preparatory stage	open scale					l: lli	c: connective imposing temporal ordering	BackFore: Bacgrd Forwards			V0 >> V1 = V0-clause dominates V1-clause
			ATM GROUP: atomic with group subject referent (complex referent, but no incremental reading)							clit: temporal clitic (subordinator	TempShift: 'forced' temporal shift with e.g. 'then'		Hab: habitual
			Q Incr: non-atomic with incremental theme							co: connective with overlap (FBP)			Iter: terative
			I Incre: non-tomic with intensity scale (no incremental theme)							it: sequence of iterated events			Coord PST : V-Ø coordinated with V-PST
										r: resultative			LLI<SoE: LLI followed by SOE
										cons: construction			LLI>SoE SoE triggered by LLI
										lli: event bounded on the right or left by lli			AspClit: aspectual clitic
													CausSub: causal subordinate clause
													Matrix-ST> ObjCl: past matrix clause dominates (zero-marked) complement clause
													<DiscCon: followed by a discourse connective
													SoE-PST (DiscCon/parataxis): first or previous segment of the SoE is marked in the past	Perf matrix >
													Overlap-PST: backgrounded clause is in the past
													SoE DiscCon/parataxis-PST: subsequent segment(s) in SoE appear(s) in the past
													DiscCon SoE : discourse connective precedes USP segment
													Sim: simultaneous events
													TempShift: discontinuous states

## Sheet: Aktionsart general sheetVerb ro
ruk+wulyaka-ja	stir; spin; turn.around	activity	BD PLUR ACT	n	y	PFV	x	ctx	x	c	Narr	past	SoE DiscCon	V1-Ø akwa V2-Ø	could be durative perfective	nu-ruki+lyaka-ja-Ø=ma akwa nə-dhakba-jang-Ø=ma	REAL.3m>NEUT-stir-CAUS-USP=MUT and REAL.3M-grind-REFL-USP=MUT	‘he stirred and ground up [the food]’	ST, JRB1-029-03, 00.27.28-00.27.34	elicitation (video stimuli)
dhakba-jangu	grind; knock [+REFL]	activity	BD PLUR ACT	n	y	PFV	x	t	x	c	Narr	past	SoE DiscCon	V0-PST akwa V1-Ø		nu-ruki+lyaka-ja-Ø=ma akwa nə-dhakba-jang-Ø=ma	REAL.3m>NEUT-stir-CAUS-USP=MUT and REAL.3M-grind-REFL-USP=MUT	‘he stirred and ground up [the food]’	ST, JRB1-029-03, 00.27.28-00.27.34	elicitation (video stimuli)
ngurrkwa	hunt	activity	CUM ACT	n	y	IMPFV	x	x	h	x	Narr? Backgr?	past	∅? Hab?	V1-Ø	Impossible to judge out of context	nu-ngurrkwa-Ø=m yimendhə=wa	REAL.3M-hunt-USP=MUT MASC.turtle=ALL	‘He hunted turtles’	CW, JRB1-001-01, 00.04.56-00.04.58	elicitation (translation task)
ngemba	bathe	activity	CUM ACT	n	y	PFV?	x	m	x	x	Narr?	past	PstMod	adhuwaba V1-∅		adhuwaba n-akəna nenəngkwarba nə-ngemba-Ø mijiyely=manja	today 3M-that 3M.man REAL.3M-bathe-USP VEG.beach=LOC	‘that man, he swam at the beach’	JL, JRB1-050-01, 00.06.52-00.07.02	elicitation (flash card stimuli)
mebi	sing	activity	CUM ACT	n	y	IMPFV	x	x	x	x	Backgr	present	∅?	V1-∅		n-akəna nenəngkwarba nə-mebu-Ø=ma	3M-that 3M.man REAL.3M-sing-USP=MUT	‘the man is singing’	JL, JRB1-049-01, 00.25.23-00.25.50	elicitation (translation task)			JL: ‘he sang a song, nəmebuma, nəmebuma, it's singing. Yeah, that man is singing, yeah nakəna nenəngkwarba nəmebuma, he was singing, yeah, he [is] singing, like he's singing now, nakəna nenəngkwarba nəmebuma’
engkərrka	think; listen	activity	CUM ACT	n	y	IMPFV	x	x	x	x	Backgr	present	∅?	V1-∅		n-aka nenəngkwarba n-engkirrka-Ø	3M-this 3M.man REAL.3M-think-USP	‘that man, he think[s]’	JL, JRB1-049-01, 00.48.45-00.48.50	elicitation (translation task)
engkərrka	think; listen	activity	CUM ACT	n	y	IMPFV	i	x	x	o	Backgr	present	RED-Ech + V-PR	V1-∅ V2-∅ V3-∅ V4-NPST		n-akəna nenəngkwarba n-engkirrka-Ø n-engkirrka-Ø n-engkirrka-ja-ma=na?, n-engkirrka-Ø	3M-that 3M.man REAL.3M-think-USP REAL.3M-think-USP REAL.3M-think-NPST=MUT=TAG REAL.3M-think-USP	‘the man’s thinking’	JL, JRB1-049-01, 00.49.24-00.50.06	elicitation (translation task)			JL: ‘yeah that's right, neng- yeah, he's thinking, that man is thinking, naka nenəngkwarba nengkirrkajama, or nakəna nenəngkwarba nengkirrkajawiya, he's thinking, like nengkirrkajawiya, or nakəna nenəngkwarba nengkirrka, he's..’
engkərrka	think; listen	activity	CUM ACT	n	y	IMPFV	x	t	x	c	Backgr	past	SoE-PST DiscCon	V0-PST akwa V1-∅		n-akən James=a n-ardi-nga-ma n-abən nenəngkwarba akwa n-engkərrka-Ø	3M-that James=PF REAL.3M-call.out-PST=MUT 3M-that 3M.man and REAL.3M-listen-USP	‘James called out to that boy, and he listened’	ST, JRB1-054-01, 00.22.57-00.23.06	elicitation (translation task)
ngərraja	argue.about	activity	CUM ACT	n	y	PFV	x	t	d	p	Narr	past	AspMod.DiscCon-PST SoE	adhənuba=wiya ('after a short time') V0-PST V1-∅ V2(=V1)-∅	Re-iteration/reformulaiton of PST V	adhənuba=wiya wurrəng-alhəkina Wakaba akwa Dangmiyala narrəngi-be-yi-na narra-lhərrakə-ngərraja-Ø, nenənga-ngərraja-Ø Stella n-akəna=lhangwa Nenungwanjirrumiya=lhangwa dhadhingiy-enikba	soon=QUANT 3F.DU-those.two Wakaba and Dangmiyala REAL.3F.DU-argue-RECIP-PST REAL.3F.DU>3A-internal.organs(?)-argue.about-USP REAL.3F.DU>3A-argue.about-USP Stella 3M-that=POSS Nenungwanjirrumiya=POSS 3F.wife-3M.KIN	‘At first Wakaba and Dangmiyala had an argument, they both argued over them two, they argued over Stella the wife of Nenungwanjirrumiya’	Akingambaja-langwa [=About Washing Ceremony], A3370a SIDE1 a5.3	narrative
angkarrə	run	activity	CUM ACT	dna	y	IMPFV	x	x	x	x	Backgr	present	∅	V1-Ø		n-angkarra-Ø	REAL.3M-run-USP	‘[he] runs’ (JB asks ‘and is that for now or before?’, JL replies ‘now’)	JL, JRB1-060-02, 00.25.33-00.25.38	elicitation (video stimuli)
angkarrə	run	activity	CUM ACT	dna	y	IMPFV	m	x	x	x	Backgr	present	PrMod 'now'	V1-Ø		n-angkarra-Ø, now, n-angkarra-Ø	REAL.3M-run-USP REAL.3M-run-USP	‘[he] runs’	JL, JRB1-060-02, 00.27.39-00.27.42	elicitation (video stimuli)
ruk+wulyaka-ja	stir; spin; turn.around	activity	CUM PLUR ACT	n	y	PFV? IMPFV?	x	m	x	x	Narr? Backgr?	past	PstMod	yarrungkwa V1-Ø		yarrungkwa n-akəna ni-yuwkujiya nə-ruk+wulyaka-ja-Ø-ma	yesterday 3M-that 3M.small REAL.3M>NEUT-stir-CAUS-USP=MUT	‘Yesterday the boy turned [the wheel] around’	JL, JRB1-023-01, 00.37.20-00.37.28	elicitation (video stimuli)
ruk+wulyaka-ja	stir; spin; turn.around	activity	CUM PLUR ACT	n	y	PFV? IMPFV?	x	m	x	x	Narr? Backgr?	past	PstMod	yarrungkwa V1-Ø		yarrungkwa n-akəna niyukwujiya nəmə-ruk+wulyaka-ja-Ø=ma mijiyanga	yesterday 3M-that 3M.small REAL.3M>VEG-stir-CAUS-USP=MUT VEG.boat	‘Yesterday the boy turned the [wheel of the] boat around’	JL, JRB1-024-01, 00.07.44-00.07.58	elicitation (video stimuli)
angkarrə	run	activity bounded	BD ACT	dna	n	PFV	x	t	x	p	Narr	past	SoE-PST parataxis	V1-Ø V2-PST akwa V3-PST		y-aka yirrburrbula n-angkarra-Ø m-əkəna [nu?]ma-jama-Ø akəna wall=a akwa [nə?]-nguwanjə-n=dha	MASC-this MASC.ball REAL.MASC-roll-USP VEG-that REAL.VEG-do-PST NEUT.that NEUT.wall= PF and REAL.NEUT(?)-stop-PST=TRM	‘The ball rolled hit the wall and stopped’	ST, JRB1-034-01, 00.16.53-00.17.00	elicitation (translation task)
angkarrə	run	activity bounded	BD ACT	dna	y	PFV	x	t	x	c	Narr	past	SoE DiscCon-PST	akwa V1-∅ arakba V2-PST n-ərribərriba		akwa n-angkarra-Ø arakba nu-wurda-nga angwarnda=manja abalkaya=dha	and REAL.3M-run-USP COMPL.ACT REAL.3M-climb-PST NEUT.stone=LOC above=TRM	‘And he ran off (and) climbed high on the rocks’	Chasm Island, A3368a Side1, 00:01:38.930-00:01:43.290	narrative
mebi	sing	activity bounded	BD ACT MAX	dna	y	PFV	x	ctx	x	x	Narr?	past	∅?	V1-∅	Translation suggests a transitive reading. Rather more like a bounded activity?	n-akəna nenəngkwarba nə-mebu-Ø=ma	3M-that 3M.man REAL.3M-sing-USP=MUT	‘he sang a song’	JL, JRB1-049-01, 00.25.23-00.25.50	elicitation (translation task)			JL: ‘he sang a song, nəmebuma, nəmebuma, it's singing. Yeah, that man is singing, yeah nakəna nenəngkwarba nəmebuma, he was singing, yeah, he [is] singing, like he's singing now, nakəna nenəngkwarba nəmebuma’; JL doesn’t like this form as much as others such as nəmebinəma
mebi	sing	activity bounded	BD ACT MAX	dna	y	PFV	x	ctx	x	x	Narr?	past	∅?	V1-∅ + Obj		arnkawura n-akəna nenəngkwarba nə-mebu-Ø=ma emeba	one.day 3M-that 3M.man REAL.3M-sing-USP=MUT NEUT.song	‘he sang a song’	JL, JRB1-049-01, 00.27.36-00.28.02	elicitation (translation task)			JL: ‘like to me, I heard that man, he was singing, so arnkawura nakəna nenəngkwarba nəmebuma emeba, nəmebuma, he was like sing- he [is] singing, I heard him singing, so nəmebuma, yeah, numebuma, I heard him singing, he was s- I heard him singing a song, so nəmebuma’
ruk+wulyaka-ja	stir; spin; turn.around	activity bounded	BD PLUR ACT	n	y	PFV	x	t	x	c	Narr	past	SoE DiscCon-PST	V1-Ø akwa V2-PST		n-aka nenəngkwarba nə-ruk+wulyaka-ja-Ø=ma, nu-rək+wulyaka-ja-Ø anhənga akwa n-errəngala-ng=ma	3M-this 3M.man REAL.3M>NEUT-stir-CAUS-USP=MUT REAL.3M>NEUT-stir-CAUS-USP NEUT.food and REAL.3M-itch-PST=MUT	‘The man stirred the food and ate it’	CW, JRB1-023-01, 00.24.42-00.25.06	elicitation (video stimuli)
ruk+wulyaka-ja	stir; spin; turn.around	activity bounded	BD PLUR ACT	n	y	PFV	x	t	x	c	Narr	past	SoE DiscCon-PST	V1-Ø akwa V2-PST		n-aka nenəngkwarba nə-ruk+wəlyaka-ja-Ø=ma anhənga akwa n-alyba-rnə=ma	3M-this 3M.man REAL.3M>NEUT-stir-CAUS-USP=MUT NEUT.food and REAL.3M-eat-PST=MUT	‘The man stirred the food and ate it’	CW, JRB1-023-01, 00.29.36-00.30.02	elicitation (video stimuli)
ruk+wulyaka-ja	stir; spin; turn.around	activity bounded	BD PLUR ACT	n	y	PFV	x	t	x	c	Narr	past	SoE DiscCon-PST	V1-Ø akwa V2-PST		n-akəna ni-yuwkujiya nəmə-rək+wulyaka-ja-Ø-ma… akwa n-andhey=ma	3M-that 3M.small REAL.3M>VEG-stir-CAUS-USP=MUT… and REAL.3M-look.PST=MUT	‘The boy turned [the wheel] around and looked out [of the binoculars]’	JL, JRB1-023-01, 00.36.30-00.36.58	elicitation (video stimuli)
njurrkwa-ja	move	activity bounded/inchoative activity	COS ATM or BD ACT	n	y	PFV	x	t	x	c	Narr	past	SoE-PST DiscCon	V0-PST akwa V1-Ø		n-aka nenəngkwarba ni-jəra-ng=ma akwa ni-njurrkwa-ja-Ø=m akən fridge=a	3M-this 3M.man REAL.3M>NEUT-push-PST=MUT and REAL.3M>NEUT-move-CAUS=USP=MUT NEUT.that NEUT.fridge=PF	‘The man pushed and moved the fridge’	ST, JRB1-038-01, 00:07:50-00:07:58	elicitation (video stimuli)	REAL-push-PST=MUT + akwa + REAL-move-CAUS=USP=MUT
njurrkwa-ja	move	activity bounded/inchoative activity	COS ATM or BD ACT	n	y	PFV	x	tm	x	c	Narr	past	PstMod + SoE-PST DiscCon	yarrungkwa V0-PST akwa V1-Ø		n-akəna nanəngkwarba yarrungkwa ni-jara-ngu=ma akwa ni-njurrkwa-ja-Ø=ma akən fridge	3M-that 3M.man yesterday REAL.3M>NEUT-push-PST=MUT and REAL.3M>NEUT-move-CAUS=USP=MUT NEUT.that NEUT.fridge	‘Yesterday the man pushed and moved the fridge’	ST, JRB1-038-01, 00:08:17-00:08:27	elicitation (video stimuli)	REAL-push-PST=MUT + akwa + REAL-move-CAUS=USP=MUT
njurrkwa-ja	move	activity bounded/inchoative activity	COS ATM or BD ACT	n	y	PFV	x	t	x	c	Narr	past	SoE-PST DiscCon	V0-PST akwa V1-Ø		n-akəna nenəngkwarba ni-jura-ngu=ma akwa ni-njurrkwa-ja-Ø=ma akəna fridge=a	3M-that 3M.man REAL.3M>NEUT-push-PST=MUT and REAL.3M>NEUT-move-CAUS=USP=MUT NEUT.that NEUT.fridge=PF	‘The man pushed and moved the fridge’	JL, JRB1-038-01, 00:09:07-00:09:17	elicitation (video stimuli)	REAL-push-PST=MUT + akwa + REAL-move-CAUS=USP=MUT
njurrkwa-ja	move	activity bounded/inchoative activity	COS ATM or BD ACT	n	y	PFV	x	tm	x	c	Narr	past	PstMod + SoE-PST DiscCon	arakbəwiya V0-PST akwa V1-Ø		arakbəwiya n-akəna nenəngkwarba ni-jura-ngu=ma akwa ni-njurrkwa-ja-Ø=ma akəna fridge	long.ago 3M-that 3M.man REAL.3M>NEUT-push-PST=MUT and REAL.3M>NEUT-move-CAUS=USP=MUT NEUT.that NEUT.fridge	‘Long time ago the man pushed and moved the fridge’	JL, JRB1-038-01, 00:09:22-00:09:32	elicitation (video stimuli)	REAL-push-PST=MUT + akwa + REAL-move-CAUS=USP=MUT
njurrkwa-ja	move	activity bounded/inchoative activity	COS ATM or BD ACT	n	y	PFV	x	tm	x	c	Narr	past	SoE DiscCon-PST + PstMod	adhuwaba V1-∅ akwa V2-PST		adhuwaba n-aka nanəngkwarba ni-njurrkwa-ja-Ø=ma akwa ni-jəra-ng=m akən fridge	today 3M-that 3M.man REAL.3M>NEUT-move-CAUS-USP=MUT and REAL.3M>NEUT-push-PST=MUT NEUT.that NEUT.fridge	‘Today the man moved and pushed the fridge’	ST, JRB1-038-01, 00:08:35-00:08:42	elicitation (video stimuli)	REAL-move-CAUS=USP=MUT + akwa + REAL-push-PST=MUT
mureye	be.hungry	activity CoS UBD	CUM DA SCAL	open relative	n	IMPFV	x	x	x	x	Backgr	present	∅	V1-∅	Cofs root in fact	abərruwa narra-mərndakə-murey-mureya-Ø	3A.PRO REAL.3A-many-REDUP-be.hungry-USP	‘They getting [really] hungry’	JL, fieldnotes, 19/11/2018	elicitation (translation task)
angkarrə	run	activity max	BD ACT MAX	b	y	PFV	x	ctx	dil	lli	Narr	past	XTD-SoE AspMod	V1-∅:::=wa V2-∅		yingi-rukwulyaka-Ø ying-angkarru-Ø:::=wa, ying-arjiyi-nga akuwabijina awurukwa	REAL.3F-go.around-PST REAL.3F-fly-Ø.XTD=PL REAL.3F-stand-CofS beside NEUT.billabong	‘She flew down and circled round and round (until) she was standing at the edge of the billabong’	GL, A3369a Side1, a3.7 Nimimba-langwa akwa nenikuwenikba-langwa ‘The blind man’	narrative
ngərraja	argue.about	activity max	BD ACT MAX	b	y	PFV	x	tm	d	p	Narr	past	AspMod.DiscCon-IRR.PST SoE parataxis (> DiscCon)	adhənuba ('soon') V-2-IRR-PST(AVERT) V-1-IRR-PST V0-PST V1-∅ V2-PST V3-PST	ongoing argument presented as at once averted and ongoing => unfinished argument?	yakwujine=ka adhənuba ka-wardi-yi-nə=ma wurr-akəna akəna karri-ngirra-ju-wa=ma, narri-ngərrajə-Ø=ma dhambula akəna narr-arriyaka-Ø=ma akəna ne-yama-Ø wurru-wurr-akuwarra ka-wardi-yi-nə=me=ka adhənuba akəna yanda ngawa narra-yangki-yangk-arringa-rna	there=EMPH soon IRR.3A-hit-RECIP-PST=MUT COLL-that NEUT.that IRR.3A-argue.about-CAUS-PST=MUT REAL.3A-argue.about-USP=MUT FEM.feather.string NEUT.that REAL.3A-make.mistake-PST=MUT NEUT.that REAL.3A-say-PST 3A-REDUP-half IRR.3A-hit-RECIP-PST=MUT=EMPH soon NEUT.that only CONT.ACT REAL.3A-REDUP-voice-break-PST	‘Soon they were just about to fight over the feather string, they were arguing over it, they all said some made a mistake and half of the people nearly had a fight but some of the people had stopped them’	Akingambaja-langwa [=About Washing Ceremony], A3370a SIDE1 a5.3	narrative
lyangk+wama-ja	blink	atomic semelfactive	COS ATM	b	y	PFV	x	ctx	x	x	Narr	past	∅	V1-Ø		n-aka nenəngkwarba nəma-lyangk+wama-ja-Ø-ma	3M-this 3M.man REAL.3M<VEG-head+nod-CAUS-USP=MUT	‘He blinked [his eye]’	CW, JRB1-023-01, 00.13.32-00.13.40	elicitation (video stimuli)
lyangk+wama-ja	blink	atomic semelfactive	COS ATM	b	y	PFV	x	ctx	x	x	Narr	past	∅	V1-Ø		nəma-lyangk+wəma-ja-Ø-ma	REAL.3M<VEG-head+nod-CAUS-USP=MUT	‘He blinked [his eye]’	JL, JRB1-023-01, 00.13.44-00.13.46	elicitation (video stimuli)
lyangk+wama-ja	blink	atomic semelfactive	COS ATM or BD PLUR ACT	b	y	PFV	x	m	x	x	Narr	past	PstMod	yarrungkwa V1-Ø		yarrungkwa n-akəna nenəngkwarba numa-lyangk+wama-ja-Ø-ma menba	yesterday 3M-that 3M.man REAL.3M<VEG-head+nod-CAUS-USP=MUT VEG.eye	‘Yesterday the man blinked his eye’	JL, JRB1-023-01, 00.15.54-00.16.12	elicitation (video stimuli)
mədhilyakbə	cough	atomic semelfactive	COS SEMELF	dna	n	PFV	x	t	x	cc	Narr	past	SoE DiscCon-IRR.PST	V-2-∅ akwa V-1-∅ akwa kamba V0-∅ V1-∅ V2-IRR-PST	CofS affix +-∅ or did you change your mind? Anin texts is rather: 'he came and sat down, sneezed, then stood up and walked away'	n-akən nanəngkwarba nə-lhəka-Ø=ma n-ambarr-nga=ma akən-manja chair=a akwa nə-mədhilyakbə-Ø-ma akwa kamba nə-kw-aji-nga=ma kənə-lhəka-nə=ma	3M-that 3M.man REAL.3M-go-USP=MUT REAL.3M-sit-CofS=MUT NEUT.that=LOC chair=PF and REAL.3M-cough-USP=MUT and then REAL.3M-half(?)-be.upright-CofS=MUT IRR.3M-go-PST=MUT	‘he stood up, coughed, and walked away’	ST, JRB1-037-01, 00:31:11-00:31:21	elicitation (video stimuli)
akburranga	find; reach	atomic telic	COS ATM GROUP-T	b	y	PFV	x	x	x	c	Narr	past	SoE DiscCon	biya V1-∅		biya Nabali=lhangwa=manja angalya nen-akburranga-Ø	and.then Nabali=POSS=LOC NEUT.place REAL.3A>3M-find-USP	‘Then at Nabali's place they all found him’	Akingambaja-langwa [=About Washing Ceremony], A3370a SIDE1 a5.3	narrative
angurrkwuru-da	curve; bend; go.around.corner	atomic telic	COS ATM-T	b	y	PFV	x	ctx	x	c	Narr	past	LocMod	yadəkəna ('from there') V1-Ø		yadəkəna ngalh-aja n-angurrkwuru-da-Ø angamba biya alyuwangmanja	from.there NEUT.PRO-CofR REAL.NEUT-corner-INCH-USP where and.then place.name	‘from there, they went around the corner, and there that place is Alyuwangmanja’	MM, JRB1-005-01, 00.00.58-00.01.03	narrative
kw+arrangə	cut	atomic telic	COS ATM-T	b	y	PFV	x	m	x	x	BackFore	past	PstMod	yarrungkwa V1-Ø	Backgr on 'holding'	yarrungkwa n-akəna nenəngkwarba nu-wilyaka-Ø=ma a-ki-ngkarrnga en=lhang=manja ayerrka akəna a-ki-ngkarrnga akwa nu-kw+arrangu-Ø=ma amamərarra	yesterday 3M-that 3M.man REAL.3M>NEUT-hold-PST=MUT NEUT-NSR-cut 3M.POSS=LOC NEUT.hand NEUT.that NEUT-NSR-cut and REAL.3M>NEUT-half+cut-USP=MUT NEUT.stick	‘Yesterday the man was holding the knife in his hand and cut the stick’	JL, JRB1-029-01, 00.02.40-00.03.16	elicitation (video stimuli)
kw+arrangə	cut	atomic telic	COS ATM-T	b	y	PFV	x	m	x	x	Narr	past	PstMod	yarrungkwa V1-Ø		yarrungkwa n-akəna nenəngkwarba nu-kw+arrangu-Ø=ma amamərarra eyika en=lhangə-ma alhəka	yesterday 3M-that 3M.man REAL.3M>NEUT-half+cut-USP=MUT NEUT.stick NEUT.tree 3M.PRO=POSS=INST NEUT.foot	‘Yesterday the man cut the stick with his foot’	JL, JRB1-029-01, 00.04.18-00.04.37	elicitation (video stimuli)
kw+arrangə	cut	atomic telic	COS ATM-T	b	y	PFV	x	m	x	x	Narr	past	PstMod	yarrungkwa V1-Ø		yarrungkwa n-aka nenəngkwarba nu-kw+arrangu-Ø=ma akəna amamərarra ayika en=lhangə=ma alhəka	yesterday 3M-that 3M.man REAL.3M>NEUT-half+cut-USP=MUT NEUT.that NEUT.stick NEUT.tree 3M.PRO=POSS=INST NEUT.foot	‘Yesterday the man cut the stick with his foot’	JL, JRB1-029-01, 00.07.11-00.07.18	elicitation (video stimuli)
ngk+arrangə	cut	atomic telic	COS ATM-T	b	y	PFV	x	m	x	x	Narr	past	PstMod	yarrungkwa V1-Ø		yarrungkwa n-aka nenəngkwarba ni-ngk+arrənga-Ø nu-kw+arrangu-Ø-ma ni-ngk+arrnga-rnu-ma ene=lhangwa	yesterday 3M-that 3M.man REAL.3M>NEUT-?+cut-USP REAL.3M>NEUT-?+cut-USP=MUT REAL.3M>NEUT-?+cut-USP=MUT 3M.PRO=POSS	‘Yesterday the man cut [the stick with] his foot’	JL, JRB1-029-01, 00.08.01-00.08.23	elicitation (video stimuli)
adhərrə	spear; pierce	atomic telic	COS ATM-T	b	y	PFV	x	ctx	x	c	Narr	past	SoE DiscCon	POSS akena V0-∅ biya V1-∅		en=lhang=manja ayerrka akena n-andheya biya n-adharrə-Ø=ma jurra=manja	3M.PRO=POSS=LOC NEUT.hand but 3M-look.around.PST and.then REAL.3M>NEUT-spear-USP=MUT NEUT.book=LOC	‘[he was holding the knife] in his hand, he looked around and then he speared the paper’	JL, JRB1-029-03, 00.07.34-00.07.48	elicitation (video stimuli)
adhərrə	spear; pierce	atomic telic	COS ATM-T	b	y	PFV	x	t	x	c	BackFore	past	SoE-PST DiscCon-PST	yarrungkwa V0-PST akwa V1-Ø	Backgr on 1s V 'holding'	yarrungkwa maməwəra=manja n-aka nenəngkwarba nu-wilyaka-Ø=ma lyelyinga akwa n-adharra-Ø jurru=manja	yesterday VEG.day=LOC 3M-this 3M.man REAL.3M>NEUT-hold-PST=MUT NEUT.knife and REAL.3M>NEUT-spear-USP NEUT.paper=LOC	‘yesterday morning the man was holding a knife and speared the paper’	JL, JRB1-029-03, 00.08.53-00.09.09	elicitation (video stimuli)
adhərrə	spear; pierce	atomic telic	COS ATM-T	b	y	PFV	x	t	x	c	BackFore	past	SoE-PST DiscCon	V0-PST akwa V1	Backgr on 'holding'	ni-lyinga-Ø=ma akəna lyelyinga en=lhang=manja ayerrka akwa n-adharra-Ø jurra=manja	REAL.3M>NEUT-hold-PST=MUT but NEUT.knife 3M.PRO=POSS=LOC NEUT.hand and REAL.3M>NEUT-spear-USP paper=LOC	‘he was holding the knife in his hand and speared the paper’	JL, JRB1-029-03, 00.09.27-00.09.33	elicitation (video stimuli)
errikbə	throw	atomic telic	COS ATM-T	b	y	PFV	x	ctx	x	x	Narr	past	SoE DiscCon	V0 akwa V1		n-aka nenəngkwarba nəmə-wilyaka-Ø=ma malarra ayerrk=manja akwa n-errikba-Ø, n-errikbu-Ø=ma	3M.this 3M.man REAL.3M>VEG-hold-PST=MUT VEG.rock NEUT.hand=LOC and REAL.3M-throw-USP REAL.3M-throw-USP=MUT	‘the man was holding the rock in his hand and threw it’	JL, JRB1-029-03, 00.10.43-00.11.06	elicitation (video stimuli)
errikbə	throw	atomic telic	COS ATM-T	b	y	PFV	x	ctx	x	x	Narr	past	∅?	V1-Ø		n-errikbu-Ø-ma malarra	REAL.3M-throw-USP=MUT VEG.rock	‘[he] threw the rock’	ST, JRB1-029-03, 00.12.09-00.12.13	elicitation (video stimuli)
məra+junga-ja	wake.up.someone	atomic telic	COS ATM-T	b	y	PFV	x	ctx	x	c	Narr	past	DiscCon SoE	biya V1-Ø		biya n-aka nu-wilyab nenəngkwarba nen-məra+junga-ja-Ø=ma	and.then 3M-this 3M-one 3M.man REAL.3M>3M-wake.up-CAUS-USP=MUT	‘and then he woke him up’	ST, JRB1-029-03, 00.23.31-00.23.38	elicitation (video stimuli)
məra+junga-ja	wake.up.someone	atomic telic	COS ATM-T	b	y	PFV	x	t	x	c	BackFore	past	Back-Fore-PST Overlap-PST DiscCon	V0-PST akena V1-∅	Backgr on 'sleeping'	n-aka nenəngkwarba nə-rrak-ajey-mə=na ni-jungu-nə-ma marrnga chair=manja akena nu-wilyaba nenəngkwarba nenu-məra+janga-ja-Ø=ma	3M-this 3M.man 3M-?-be.upright.PST=MUT=TAG REAL.3M-be.tired-PST=MUT VEG.sleep NEUT.chair=LOC but 3M-one 3M.man REAL.3M>3M-wake.up-CAUS-USP=MUT	the man was sleeping in the chair, but the [other] man woke him up’	JL, JRB1-029-03, 00.24.50-00.25.13	elicitation (video stimuli)
məra+junga-ja	wake.up.someone	atomic telic	COS ATM-T	b	y	PFV	x	ctx	x	x	Narr	past	∅?	V1-Ø		n-akəna nu-wilyaba nenəngkwarba nen-məra+janga-ja-Ø=ma	3M-that 3M-one 3M.man REAL.3M>3M-wake.up-CAUS-USP=MUT	‘the man woke him up’	ST, JRB1-029-03, 00.25.58-00.26.04	elicitation (video stimuli)
jerrədhə	get finished; become finished; be finished	atomic telic	COS ATM-T	b	y	PFV	x	t	rl	cp::	Narr	past	AspMod SoE-PST XTD DiscCon	ngawa (cont.act) V0-XTD-PST eken V1-Ø	not sure about gloss for RED - XTD?	ni-yen-jem-Ø ngaw n-a:::dhərra-Ø=m akən jurra ekena ne-jerrədhə-Ø=m akən jurr- jurra kemba nara=b kən-adhərre-na	REAL.3M-REDUP-do-PST cont.act REAL.3M>NEUT-XTD.pierce-USP=MUT NEUT.that NEUT.paper but REAL.3M-be.finished-USP=MUT NEUT.that NEUT.paper NEUT.paper then NEG=EMPH IRR.3M-pierce-PST	‘He kept on piercing the paper bag, but then he finished, then he didn’t pierce [it] anymore’	ST, JRB1-037-01, 00:25:09-00:25:18	elicitation (video stimuli)
jerrədhə	get finished; become finished; be finished	atomic telic	COS ATM-T	b	y	PFV	x	t	x	c	BackFore	past	Overlap-PST DiscCon + AspMod	angkwabəbərn=lhanga ('all day long') V0-PST eken V1-Ø		n-aka nenəngkwarba angkwabəbərn=lhanga n-adhərra-ngu=ma akəna jurra eken nara=ba nə-jerrədha-Ø	3M-that 3M.man all.day=ABL REAL.3M>NEUT-pierce-PST=MUT NEUT.that NEUT.paper but NEG=EMPH REAL.3M-be.finished-USP	‘He was piercing the bag all day, but then he finished’. (what about nara???)	CW, JRB1-037-01, 00:26:14-00:26:26	elicitation (video stimuli)
anga	bite	atomic telic	COS ATM-T	b	y	PFV	x	m	x	x	Narr	past	PstMod	yarrungkwa V1-∅		yarrungkwa wurr-akəna wurruwarda nan-anga-Ø n-akəna nenjarrngalya	yesterday COLL-that COLL.dog REAL.COLL>3M-bite-USP 3M-that 3M.boy	‘Yesterday the dog bit the boy’	ST, JRB1-054-01, 00.13.10-00.13.14	elicitation (flash card stimuli)
anga	bite	atomic telic	COS ATM-T	b	y	PFV	x	m	x	x	Narr	past	PstMod	arakbəwiya V1-∅		arakbəwiya wurr-akəna wurruwarda nan-anga-Ø=ma n-akəna nenjarrngalya	long.ago COLL-that COLL.dog REAL.COLL>3M-bite-USP=MUT 3M-that 3M.boy	‘Long time ago the dog bit the boy’	ST, JRB1-054-01, 00.14.11-00.14.18	elicitation (flash card stimuli)
anga	bite	atomic telic	COS ATM-T	b	y	PFV	x	m	x	x	Narr	past	PstMod	yarrungkwa V1-∅		yarrungkwa wurr-akəna wurruwarda nan-anga-Ø=mərra n-akən=manja nanjarrngalya	yesterday COLL-that COLL.dog REAL.COLL>3M-bite-USP=MUT 3M-that=LOC 3M.boy	‘Yesterday the dog bit the boy’	ST, JRB1-054-01, 00.12.06-00.12.12	elicitation (flash card stimuli)			When considering the difference between nanangama and nanangamərra, and after producing the form nanangamərra several times and apparently acknowledging it, ST says ‘I would never say nanangamərra, never, doesn't sound right to me. Some people might use it, it is used, but I'd prefer to say- I reckon this sounds right [with =ma]. Yarrungkwa wurrakəna wurruwarda nanangama nakəna nenjarrngalya, tha…
lekbu	blame	atomic telic	COS ATM-T	b	y	PFV	x	x	x	x	Narr	past	∅?	V1-∅	verbum dicendi = achievement	n-aka nanəngkwarba nen-lekbu-Ø=ma n-aka nenjarrngalya	3M-that 3M.man REAL.3M>3M-blame-USP=MUT 3M-that 3M.boy	‘the man accused the boy’	ST, JRB1-051-01, 00.19.41-00.20.01	elicitation (translation task)
lekbu	blame	atomic telic	COS ATM-T	b	y	PFV	x	x	x	x	Narr	past	∅?	V1-∅	verbum dicendi = achievement	nen-lekbu-Ø=ma	REAL.3M>3M-blame-USP=MUT	‘he accused him’	ST, JRB1-051-01, 00.19.41-00.20.01	elicitation (translation task)
yerraka-ja	make.ashamed; tell.off	atomic telic	COS ATM-T	b	y	PFV	x	t	x	co	BackFore	past	Overlap-PST SoE DiscCon	V1-0-PST biya V1-∅		wurr-akəna wurr-ambilyuma wurri-yukwuja-kiya na-bey-nu-ma biya neba-rrəngba neni-yerraka-ja-Ø=ma	COLL-that COLL-two COLL-small-two REAL.3A-argue-PST=MUT and.then 3M.uncle-3A.KIN REAL.3M>3A-ashamed-CAUS-USP=MUT	‘The two kids were quarrelling, and then their uncle told them off’	JL, JRB1-034-01, 00.05.36-00.06.00	elicitation (translation task)
kw+arrangə	cut	atomic telic	COS ATM-T	b	y	PFV	x	ctx	x	x	Narr	past	∅?	V1-∅	ach due to object dimensionality	n-akəna nenəngkwarba nu-kw+arrangu-Ø=ma ayika	3M-that 3M.man REAL.3M>NEUT-half+cut-USP=MUT NEUT.tree	‘The man cut the stick’	CW, JRB1-032-01, 00.01.17	elicitation (translation task)
adhərrə	spear; pierce	atomic telic	COS ATM-T	b	y	PFV	x	ctx	x	x	Narr	past	∅?	V1-∅	ach due to object dimensionality	n-adhərra-Ø=m akən jurra n-akən nanəngkwarba	REAL.3M>NEUT-spear-USP=MUT NEUT.that NEUT.paper 3M-that 3M.man	‘The man speared the paper’	ST, JRB1-037-01, 00:22:31-00:22:35	elicitation (video stimuli)
adhərrə	spear; pierce	atomic telic	COS ATM-T	b	y	PFV	x	x	x	x	Narr	past	∅?	V1-∅	ach due to object dimensionality	adhuwaba n-akən nanəngkwarba n-adhərra-Ø=m akən jurra lyelyingama	today 3M-that 3M.man REAL.3M>NEUT-spear-USP=MUT NEUT.that NEUT.paper MASC.knife	‘Today the man speared the paper with a knife’	ST, JRB1-037-01, 00:22:55-00:23:00	elicitation (video stimuli)
adhərrə	spear; pierce	atomic telic	COS ATM-T	b	y	PFV	x	t	x	c	Narr	past	DiscCon SoE	arakba V1-∅		arakba n-ardhərra-Ø n-akəna akwərrerrikba	COMPL.ACT REAL.3M>NEUT-spear-USP 3M-that NEUT.harpoon	‘Then he grabbed a spear (one of the men took his harpoon)’	Chasm Island, A3368a Side1, 00:01:25.200 - 00:01:28.030	narrative
adhərrə	spear; pierce	atomic telic	COS ATM-T	b	y	PFV	x	t	di	cons	Narr	past	Matrix-PST >> TempSub SoE	V0-PST yanda=lhangwa ('until') >> V1-∅		na-rukwu-lyuwake-na yanda=lhangwa nuw-ardhərra-Ø=dha	REAL.3A-body-spin-PST nothing=ABL[until] REAL.3A>NEUT-spear-USP=EMPH	‘It went round and round, until it dropped (in the sea)’	Chasm Island, A3368a Side1, 00:01:35.525 - 00:01:38.025	narrative
lharrə	fall	atomic telic	COS ATM-T	b	y	PFV	x	x	x	x	Narr	past	∅?	V1-∅		n-akəna nenəngkwarba nə-lharra-Ø	3M-that 3M.man REAL.3M-fall-USP	‘that man fall down’	JL, JRB1-049-01, 00.40.50-00.40.56	elicitation (video stimuli)
ngkə+lharrə	fall	atomic telic	COS ATM-T	b	y	PFV	x	x	x	x	Narr	past	∅?	V1-∅		n-akəna nenəngkwarba ni-ngkə+lharra-Ø	3M-that 3M.man REAL.3M-?+fall-USP	‘The man fell down’	JL, JRB1-049-01, 00.41.12-00.41.19	elicitation (translation task)			JL asked and does that [nakəna nenəngkwarba nəlharra] mean it happened now, or it happened before?’, JL replies ‘happened before’
ngkə+lharrə	fall	atomic telic	COS ATM-T	n	y	PFV	x	t	x	c	BackFore	past	Overlap-PST SoE DiscCon	V0-PST akwa V1-∅	clause chaining	n-akəna nenəngkwarba nə-majuwa-rnə-ma akwa ni-ngkə+lharra-Ø karrawara amamərarra=manja ayika	3M-that 3M.man REAL.3M-walk-PST-MUT and REAL.3M -?+fall-USP above NEUT.branch=LOC NEUT.tree	‘The man was walking along, and he fell on the tree branch’	JL, JRB1-033-01, 00.02.11-00.02.28	elicitation (translation task)
ngkə+lharrə	fall	atomic telic	COS ATM-T	n	y	PFV	x	t	x	c	BackFore	past	Overlap-PST SoE DiscCon	V0-PST akena V1-∅		n-akəna nenəngkwarba n-angkarrə-nə=manja, n-aka nenəngkwarba n-aka n-aka nenəngkwarba n-əngkarre-na akena ni-ngkə+lharra-Ø karrawara amamərarra=manja ayika	3M-that 3M.man REAL.3M-run-PST=LOC 3m-this 3M.man 3M-this 3M-this 3M.man REAL.3M-run-PST but REAL.3M-?+fall-USP above NEUT.branch=LOC NEUT.tree	‘When the man was running, he fell on the tree branch’	JL, JRB1-033-01, 00.06.11-00.06.46	elicitation (translation task)
ngkə+lharrə	fall	atomic telic	COS ATM-T	n	y	PFV	x	t	x	c	BackFore	past	Overlap-PST SoE DiscCon	V0-PST akena V1-∅		n-angkarrə-nə=manja akena ni-ngkə+lharra-Ø karrawara amamərarra-manja ayika	REAL.3M-run-PST=LOC but REAL.3M-?+fall-USP above NEUT.branch=LOC NEUT.tree	‘When he was running, he fell on the tree branch’	JL, JRB1-033-01, 00.07.00-00.07.14	elicitation (translation task)
ngkə+lharrə	fall	atomic telic	COS ATM-T	n	y	PFV	x	x	x	x	Narr	past	∅?	V1-∅		n-angaba nenəngkwarba ni-ngkə+, ni-ngkə+lharra-Ø, ni-ngkə+lharrə-Ø=ma	3M-that.one 3M.man 3M-?+, REAL.3M-?+fall-USP REAL.3M-?+fall-USP=MUT	‘The man fell down’	JL, JRB1-049-01, 00.41.50-00.41.55	elicitation (translation task)			In response to being asked ‘if I'm falling down and right now you're saying 'James...’ Then asked for clarification, JL is asked ‘if someone says nəlharra it's- he fell down? he's already on the ground?’ and JL replies ‘he f- he fell down, yeah’
rama-jungwa	get.up	atomic telic	COS ATM-T	n	y	PFV	x	tm	x	c	Narr	past	PstMod + SoE-PST DiscCon-PST	yarrungkwa V-1-PST V0-PST akwa V1-∅ akwa V2-PST		yarrungkwa n-aka nenəngkwarba nə-lhəke-na akwa na-mak+ajey=ma chair=manja akwa na-rama-jungwa-Ø akwa nu-kwa+bijangu-nə=ma	yesterday 3M-that 3M.man REAL.3M-go-PST and REAL.3M-place+be.upright.PST=MUT chair=LOC and REAL.3M-get.up-REFL-USP and REAL.3M-jump-PST=MUT	‘Yesterday the man went and sat in the chair, and then got up and jumped’	CW, JRB1-032-01, 00.33.22	elicitation (video stimuli)
warma-jungwa	rise; get.up; fly.away	atomic telic	COS ATM-T	n	y	PFV	x	tt	x	c	Narr	past	SoE DiscCon-PST	V1-∅ akwa V2-PST akwa V3-PST		wurr-akəna wurru-kwulyubena wurruweba nəw-warma-jungwa-Ø ajurungka=lhangwa akwa na-rak-wulyake-na akwa nə-lhawrradhə-na	COLL-that COLL-pretty COLL.parrot REAL.COLL-fly.away-RELF-USP NEUT.ground=ABL and REAL.COLL-round-go.around-PST and REAL.COLL-return-PST	‘The pretty parrot took off from the ground, flew round and round, and then came back’	JL, JRB1-033-01, 00.16.39-00.17.04	elicitation (video stimuli)
marrakaja	grab; take	atomic telic	COS ATM-T	b	y	PFV	x	ctx	x	x	Narr	past	∅? (but SoE context)	V1-∅		dhədharrəngka yingi-na-marrakaja-Ø akən amdejika	3F.woman REAL.3F-3M-grab-USP NEUT.that NEUT.thing	The woman grabbed the thing from him	ST, JRB1-037-02, 00:14:39-00:14:45	elicitation (video stimuli)
marrakaja	grab; take	atomic telic	COS ATM-T	b	y	PFV	x	m	x	x	Narr	past	PstMod	arakb-ərakbəwiya V1-∅		arakb-ərakbəwiya dh-akəna dhədharrəngka yingə-nə-marrakaja-Ø=ma n-akə nanəngkwarba akən ayika	REDUP-long.ago 3F-that 3F.woman REAL.3F-3M-grab-USP=MUT 3M-that 3M.man NEUT.that NEUT.tree	‘Long time ago the woman grabbed the stick from the man’	ST, JRB1-037-02, 00:16:30-00:16:43	elicitation (video stimuli)
akuma	put	atomic telic	COS ATM-T	b	y	PFV	x	ctx	x	p	Narr	past	SoE parataxis	V1-∅ V2-∅		narrə-m-akuma-Ø libaliba narrə-m-arungku-wurra-Ø	REAL.3A-VEG-put-USP VEG.canoe REAL.3A-VEG-anchor(?)-throw-USP	‘they left the libaliba and they walked (and) threw out the anchors’	Chasm Island, A3368a Side1, 00:01:11.660 - 00:01:15.035	narrative
errikbə	throw	atomic telic	COS ATM-T	b	y	PFV	x	tm	x	co	BackFore	past	PstMod Overlap-PST SoE DiscCon	V0-PST kembərra V1-∅		n-akəna nanəngkwarba ma-lyinga-Ø m-akən malarra kembərra n-errikbu-Ø-ma	3M-that 3M.man REAL.(3M)>VEG-hold-PST VEG-that VEG.stone then REAL.3M-throw-USP	‘The man was holding the stone and then threw it’	ST, JRB1-037-01, 00:42:52-00:43:01	elicitation (video stimuli)
errikbə	throw	atomic telic	COS ATM-T	b	y	PFV	x	tm	x	co	BackFore	past	PstMod Overlap-PST SoE DiscCon	V0-PST akwa V1-∅		n-akəna nenəngkwarba nəm-alyinga-Ø malarra akwa n-errikbu-Ø=ma	3M-that 3M.man REAL.3M>VEG-hold-PST VEG.stone and REAL.3M-throw-USP=MUT	‘The man was holding the stone and he threw it’	CW, JRB1-037-01, 00:43:02-00:43:11	elicitation (video stimuli)
errikbə	throw	atomic telic	COS ATM-T	b	y	PFV	x	tm	x	co	BackFore	past	PstMod Overlap-PST SoE DiscCon	yarrungkwa V0-PST V0'-PST akwa V1-∅		yarrungkwa n-aka nanəngkwarba nu-kw-ajey=ma nəm-ayinga-Ø malarra akwa n-errikbu-Ø=ma	yesterday 3M-this 3M.man REAL.3M-half(?)-be.upright.PST=MUT REAL.3M>VEG-hold-PST VEG.stone and REAL.3M-throw-USP=MUT	‘Yesterday the man was standing holding the stone, and threw it’	ST, JRB1-037-01, 00:43:26-00:43:38	elicitation (video stimuli)
errikbə	throw	atomic telic	COS ATM-T	b	y	PFV	x	t	x	c	Narr	past	DiscCon SoE DiscCon-PST	akwa arakba V1-∅ V1'-∅ akwa V2-PST		akwa arakba n-errikbə(?)-Ø n-errikbə-Ø akina akwa n-ərrəngka-Ø arakba	and COMPL.ACT REAL.3M>NEUT-throw-USP REAL.3M>NEUT-throw-USP NEUT.that and REAL.3M-look-PST COMPL.ACT	‘and he threw it. He threw it and he saw/watched it (the spear)’	Chasm Island, A3368a Side1, 00:01:28.720 - 00:01:33.075	narrative
arungku-wurra	throw.anchor	atomic telic	COS ATM-T	b	y	PFV	x	ctx	x	p	Narr	past	SoE parataxis	V0-∅ V1-∅		narrə-m-akuma-Ø libaliba narrə-m-arungku-wurra-Ø	REAL.3A-VEG-put-USP VEG.canoe REAL.3A-VEG-anchor(?)-throw-USP	‘they left the libaliba and they walked (and) threw out the anchors’	Chasm Island, A3368a Side1, 00:01:11.660 - 00:01:15.035	narrative
nekibulu	give.up	atomic telic	COS ATM-T	b	y	PFV	x	m	x	c	Narr	past	PstMOd SoE DiscCon	arakbəwiya V0-∅ kemba V1-∅	PC realis!	arakbəwiya n-aka nenəngkwarba nu-njurr-kwa-ja-Ø=ma akəna fridge=a ekena engkəbərrungwərrungwa or kamba ngə-nekibulu-Ø=m akəna	long.ago 3M-this 3M.man REAL.3M>NEUT-move-CAUS-USP=MUT NEUT.that NEUT.fridge=PF but NEUT.heavy then REAL.3M>NEUT(?)-give.up(?)-USP=MUT NEUT.that	Long time ago the man [tried to] move the fridge, but it was too heavy’ / ‘and so he gave up’	JL, JRB1-038-01, 00:14:43-00:15:08	elicitation (video stimuli)
nekibulu	give.up	atomic telic	COS ATM-T	b	y	PFV	x	t	x	co	BackFore	past	Overlap-PST SoE DiscCon	arakbəwiya V-1-IRR-PST akwa V0-IRR-∅ ekena V1-∅		arakbəwiya n-aka nenəngkwarba kənu-jura-ng=yedha akwa kənu-njurru-kwa-ji-Ø=yedh akəna fridge=a ekena nə-nekibula-Ø akwa=ba ə-mdh-akeya=wiya	long.ago 3M-that 3M.man IRR.3M>NEUT-push-PST=PURP and IRR.3M>NEUT-move-CAUS-USP=PURP NEUT.that NEUT.fridge=PF but REAL.3M>NEUT(?)-give.up(?)-USP and=EMPH NEUT-many-that(?)=QUANT	‘Long time ago the man was [trying to] push and move the fridge, but he gave up'	JL, JRB1-038-01, 00:16:14-00:16:34	elicitation (video stimuli)
jungwa	die	atomic telic	COS ATM-T	b	n	PFV?	x	x	x	x	Narr?	past	∅? (or SoE parataixis?)	V1-∅		ni-jungwa-Ø	REAL.3M-die-USP	‘that man, he died’	JL, JRB1-049-01, 00.46.49-00.47.01	elicitation (translation task)
jungwa	die	atomic telic	COS ATM-T	b	n	PFV?	x	x	x	x	Narr?	past	∅? (or SoE parataixis?)	V1-∅		n-akəna nenəngkwarba ni-jungə-Ø=ma, n-akəna nenəngkwarb ni-jungu-Ø=ma	3M-that 3M.man REAL.3M-die-USP=MUT 3M-that 3M.man REAL.3M-die-USP=MUT	‘he passed away’	JL, JRB1-049-01, 00.47.04-00.47.16	elicitation (translation task)
akburranga	find; reach	atomic telic	COS ATM-T	b	n	PFV	x	t	x	c	Narr	past	SoE-PST DiscCon	V1-PST akena V2-∅		n-aka nenəngkwarba n-aburəngke-nə=ma akena n-ang-akburranga-Ø	3M-that 3M.man REAL.3M-look.for-PST=MUT but REAL.3M-3F-find-USP	‘The man was looking for her, and he found her’	JL, JRB1-064-01, 00.21.11-00.21.17	elicitation (flash card stimuli)
akburranga	find; reach	atomic telic	COS ATM-T	b	n	PFV	x	t	x	c	Narr	past	SoE-PST DiscCon	V1-PST akwa V2-∅		n-akəna nenəngkwarba n-abərengke-nə=ma en=lhangwa warijura akwa nen-akbərranga-Ø	3M-that 3M.man REAL.3M>COLL-look.for-PST=MUT 3M.PRO=POSS COLL.child and REAL.3M>COLL-find-USP	‘The man was looking for his kids, and he found them’	JL, JRB1-034-01, 00.21.57-00.22.13	elicitation (translation task)
akburranga	find; reach	atomic telic	COS ATM-T	b	n	PFV	x	t	x	p	Narr	past	SoE-PST parataxis	V0-PST V1-∅		narrə-mirku-warrukwa-Ø narrə-m-akbərranga-Ø m-akəna	REAL.3A-neck-cross-PST REAL.3A-VEG-find-USP VEG-that	‘they crossed (a point of land) and they found/reached [it]’	Chasm Island, A3368a Side1, 00:01:19.965-00:01:22.815	narrative
warde	hit; kill	atomic telic	COS ATM-T	b	n	PFV	x	x	x	x	Narr	past	SoE parataxis?	V1-∅		n-akəna nenəngkwarba nenu-warda-Ø, nenu-warda-Ø wurr-aka wurruwarda nenu-warda-Ø wurr-aka wurruwarda	3M-that 3M.man REAL.3M>COLL-hit-USP REAL.3M>COLL-hit-USP COLL-that COLL.dog REAL.3M>COLL-hit-USP COLL-that COLL.dog	‘that man hit the dog’	JL, JRB1-049-01, 00.46.19-00.46.29	elicitation (translation task)
kwiyerrba	miss	atomic telic	COS ATM-T	b	n	PFV	x	x	x	x	Narr	past	SoE parataxis?	V1-∅		n-aka nanəngkwarba nu-kwiyerrba-Ø akəna enungkwa	3M-this 3M.man REAL.3M>NEUT-miss-USP NEUT.that NEUT.spear	‘The man missed the spear’	ST, JRB1-051-01, 00.29.44-00.29.50	elicitation (flash card stimuli)
kwiyerrba	miss	atomic telic	COS ATM-T	b	n	PFV	x	x	x	x	Narr	past	∅? SoE parataxis?	V1-∅		n-akən James=a nu-kwiyerrba-Ø y-akəna yimendha	3M-that James=PF REAL.3M>MASC-miss-USP MASC-that MASC.turtle	‘James missed the turtle’	ST, JRB1-051-01, 00.30.23-00.30.34	elicitation (flash card stimuli)			When asked what ‘nakəna nenəngkwarba nukwiyerrba yakəna yimendha’ means, ST replies ‘that man missed the turtle’. Then asked following up ‘so missed? in the past?’ ST says ‘missed, yeah’.
ngwanja	stop	atomic telic	COS ATM-T	b	n	PFV	x	ctx	x	lli	Narr	past	SoE DiscCon + XTD	V-1-PST V0-PST biya Npred-XTD V1-∅		wurru-kwala na-jungwee-yi-nə=dha ne-yamin-jamə-na biya yelyukwi::: arrərra nu-ngwanja-Ø	3A-some REAL.3A-die-RECIP-PST=TRM REAL.3M-REDUP-do-PST and.then MASC.rain.XTD NEUT.wind REAL.NEUT-stop-USP	‘(but) some died. until the rain and wind’	Chasm Island (A3368a Side1), 00:03:11.880-00:03:17.458	narrative
ambarr-nga	stand up	atomic telic	COS ATM-T	b	y	PFV	x	t	x	c	Narr	past	SoE DiscCon-IRR.PST	V-1-∅ akwa V0-∅ akwa kamba V1-∅ V2-∅ V3-IRR-PST	CofS affix +-∅ or did you change your mind? Anin texts is rather: 'he came and sat down, sneezed, then stood up and walked away'	n-akən nanəngkwarba nə-lhəka-Ø=ma n-ambarr-nga=ma akən-manja chair=a akwa nə-mədhilyakbə-Ø-ma akwa kamba nə-kw-aji-nga=ma kənə-lhəka-nə=ma	3M-that 3M.man REAL.3M-go-USP=MUT REAL.3M-sit-CofS=MUT NEUT.that=LOC chair=PF and REAL.3M-cough-USP=MUT and then REAL.3M-half(?)-be.upright-CofS=MUT IRR.3M-go-PST=MUT	‘he stood up, coughed, and walked away’	ST, JRB1-037-01, 00:31:11-00:31:21	elicitation (video stimuli)
lyumadhə	disappear	atomic telic	COS ATM-T	b	n	PFV	x	x	x	x	Narr	past	SoE parataxis?	V1-∅		yarrungkwa n-akəna nenəngkwarba ni-lyumadhə-Ø=ma	yesterday 3M-that 3M.man REAL.3M-disappear-USP=MUT	‘He disappeared’	JL, JRB1-050-01, 00.27.52-00.27.59	elicitation (flash card stimuli)
ngkə+lharrə	fall	atomic telic	COS ATM-T	b	n	PFV	x	x	x	x	Argu Epist	past	EpistMod	dhukwa V1-∅		dhukwa ne-ngkə+lharra-Ø dhukwa nara akənə=wa dhu nəw-kw-ajiya	maybe REAL.NEUT-?+fall-Ø maybe NEG NEUT.that=ALL maybe REAL.NEUT-half(?)-be.upright.NPST	‘Maybe the tree fell down, maybe it didn’t, maybe it’s still standing’	JL, JRB1-042-01, 00:15:35-00:15:59	elicitation (translation task)		epistemic
yakwabijə	forget	atomic telic	COS ATM-T	b	n	PFV	x	x	x	x	Argu Epist	past	EpistMod	dhukwa V1-∅		dhukwa ni-yakwabijə-Ø=ma ngalhanga dh-adhə-m-ikirra	maybe REAL.3M-forget-USP=MUT 3F.PRO.POSS 3F-F-INALP-name	‘he probably forgot her name’	anin2_pw_au_004, in van Egmond 2012: 232	elicitation (translation task)		epistemic
yedha	arrive	atomic telic	COS ATM-T	b	n	PERF	x	x	x	r	Argu Epist	past>present	EpistMod PerfMod	dhukwa arakba V1-∅		dhukwa arakb ni-yedha-Ø-m=dha ni-yedha-nga	maybe COMPL.ACT REAL.3M-arrive-USP=MUT=TRM REAL.3M-arrive-PST	‘Maybe he already arrived’	JL, JRB1-042-01, 00:11:26-00:11:42	elicitation (translation task)		epistemic
ngkə+lharrə	fall	atomic telic	COS ATM-T	b	n	PERF	x	x	x	r	Argu Epist	past>present	PerfMod	abad ('already') V1-∅		akəna eyika ebina ngaya ngu-lung+kwabija-Ø=ma dhukwa arakba akəna enuwə- enungkuraba akwa a-warnk-amiyerra nuw-ambilyu=m=ba biya yakwujina dhuk enukurab akən abab dhuku ne-ngkə+larra-Ø ajurungku=dha	NEUT.that NEUT.tree NEUT.that.same 1.PRO REAL.1-grow-USP=MUT maybe COMPL.ACT NEUT.that NEUT.old and NEUT-DIM-long.time REAL.NEUT-stay.PST=MUT=EMPH and.then there maybe NEUT.old NEUT.that COMPL.ACT maybe REAL.NEUT-?+fall-USP NEUT.ground=TRM	‘The tree grew already, maybe it’s already old, maybe it fell down to the ground’	JL, JRB1-042-01, 00:14:38-00:14:56	elicitation (translation task)		epistemic
errikbə	throw	atomic telic	COS ATM-T	b	n	PFV	x	x	x	c	Narr	past	SoE DiscCon	V1-∅ akena V2-∅		n-aka nenəngkwarba n-errikbi-Ø=yedha akəna dart ekena nu-kwiyarrba-Ø	3M-that 3M.man REAL.3M-throw-USP=PURP NEUT.that NEUT.dart but REAL.3M-miss-USP	‘He threw the dart, but missed’	JL, JRB1-075-01, 00:13:52.495-00:13:58.895	elicitation (translation task)
kwiyerrba	miss	atomic telic	COS ATM-T	b	n	PFV	x	x	x	c	Narr	past	DiscCon SoE	V0-∅ akena V1-∅		n-aka nenəngkwarba n-errikbi-Ø=yedha akəna dart ekena nu-kwiyarrba-Ø	3M-that 3M.man REAL.3M-throw-USP=PURP NEUT.that NEUT.dart but REAL.3M-miss-USP	‘He threw the dart, but missed’	JL, JRB1-075-01, 00:13:52.495-00:13:58.895	elicitation (translation task)
jungwa	die	atomic telic	COS ATM-T	b	n	PERF	x	x	x	cr	Perf context	past>present	PerfMod Matrix-∅(PERF) >> ObjCl	arakba V0-∅ >> V1-∅	inceptive/achievement reading of perception V	yirrə-rrəngka-Ø=ma arakba ngayuwa nəng-enibu-dhə-Ø=ma amandhangwa nəngi-jungwu-Ø=mərra=dha	REAL.2A-see-PST=MUT COMPL.ACT 1.PRO REAL.1-alive-INCH-USP=DEP true REAL.1-die-USP=MUT=TRM	‘Now you have seen that I really am alive again [it’s true that I died before]’	Bible Society in Australia 1992: 890	narrative (text translation)
jungwa	die	atomic telic	COS ATM-T	b	y	PFV	x	ctx	x	c	Narr	past	DiscCon SoE	akena V1-∅		akena n-enəng-arijira=ma ngəwa ni-jungwu-Ø=ma en-ejə-kwaba n-akəna	however 3M-M.ALP-child=PRIV CONT.ACT REAL.3M-die-USP=MUT 3m.PRO-CofR-also 3M-that	‘But he died too, without having any children’	Bible Society in Australia 1992: 822	narrative (text translation)
yedha	arrive	atomic telic	COS ATM-T	b	n	PFV	x	x	d	cons	Narr	past	SoE AspMod	V1-∅ wərənjabə=wiya ('after a quick time')		ni-yedha-Ø yakwuju wərənjabə=wiya	REAL.3M-arrive-USP there quickly=QUANT	‘He got there quick’	JL, JRB1-082-02, 00:16:21.559-00:16:26.409	elicitation (translation task)
akburranga	find; reach	atomic telic	COS ATM-T	b	n	PFV	x	m	x	x	Narr	past	PstMod	yarrungkwa V1-∅		yarrungkwa n-akən nenəngkwarrba nəm-akbərranga-Ø=ma mijiyelya	yesterday 3M-that 3M.man REAL.3M>VEG-find-USP=MUT VEG.beach	‘Yesterday he found the beach’	JL, JRB1-018-01, 00.05.31	elicitation (translation task)
jungwa	die	atomic telic	COS ATM-T	b	n	PERF	i	m	x	cr	Argu Deon	past>present	PerfMod	V1-∅ arakba ('now that…') V2-NPST		“ni-jungwu-Ø=ma arakba naw-ena, əmba Ø-lhəka-ja arakba dh-ibinu=wa dhadhingiy-enikba jeyi	REAL.3M-die-USP=MUT COMPL.ACT 3M.brother-2.KIN but DEON.2-go-NPST COMPL.ACT 3F-that.same=ALL 3F.wife-3M.KIN go!	“Now that your brother has died, go to his widow”	Bible Society in Australia 1992: 312	narrative (text translation)
lyumadhə	disappear	atomic telic	COS ATM-T	b	n	PFV	x	t	l	lli	Narr	past	XTD-RED-PST < SoE	V0-RED-PST:::=wa V1-∅		nanga-lhuku-lhukwa-mərrkaju-wa dh-adhə-m-alhəka=lhangwiyu:::=wa yingə-lhəkarrkə-lyəmadha-Ø	REAL.3M>3F-REDUP-tracks-follow-PST 3F-F-INALP-foot=PERL.XTD=PL 3F-tracks-disappear-USP	‘He kept following her tracks until they disappeared’	GL, A3374a Side2, a11.2 Search	narrative
kwa+bijanga	jump	atomic telic	COS ATM-T	b	n	PFV	x	t	l	lli	Narr	past	XTD-PST AspMod < SoE	V0-PST:::=wa V1-∅		n-angkarrə-nə-mərru:::=wa, nu-kwa+bijanga-Ø ayika=manja	REAL.3M-run-PST=MUT.XTD=PL REAL.3M-jump-USP NEUT.tree=LOC	‘He kept on running (until) he jumped behind a tree’	GL, A3369a Side1, a3.3 Kwurrirda Kwurrirda	narrative
wurra	throw	atomic telic	COS ATM-T	b	y	PFV	x	x	x	x	Narr	past	SoE parataxis?	V1-∅		malamukwa=wiya numa-wurra-Ø arrawa=lhangwa əmba nara n-ibina nenumamalya	VEG.dugout.canoe=QUANT REAL.3M>VEG-throw.away-USP inside=ABL but NEG 3M-this 3M.person	‘But he only threw out the canoe from underneath, he wasn't there’	JL, A3369b Side1, a4.4 Malamukwa-langwa ‘About canoe accident’	narrative
yengbə	talk, say	atomic telic	COS ATM-T	dna	y	PFV	x	t	x	c	Narr	past	PST-SoE DiscCon	V-1-IRR.PST akena V0-∅ akwa V1-∅	Avertive; 'was going/about to leave' might be closer to the mark	nganyangwa nabə-rraka kənə-lhəka-rni=yedha akena enlhangwa nenmamalya n-angkarr-Ø angaluba dirak=uma akwa ni-yama-Ø ni-yengba-Ø nenu-maka-Ø nungkuwa Ø-ambilya nara a-lhəka-ma	1.PRO.POSS 3M.son-1.KIN IRR.3M-go-PST=PURP but 3M.PRO.POSS 3M.person REAL.3M-run-USP from.over.there VEG.car=INST and REAL.3M-speak-USP REAL.3M-talk-USP REAL.3M>3M-say-USP 2.PRO DEON.2-stay.NPST NEG NEG.NPST-go-NEG.NPST	‘My son nearly left, however a man came from over there in a car and told him “stay, don’t go”’	JL, JRB1-075-01, 00:10:40.510-00:11:02.885	elicitation (translation task)
angkarrə	run	atomic telic	COS ATM-T	b	y	PFV	x	t	x	cc	BackFore + SoE	past	PST-SoE DiscCon	V0-IRR.PST akena V1-∅ akwa V2-∅	Avertive; 'was going/about to leave' might be closer to the mark	nganyangwa nabə-rraka kənə-lhəka-rni=yedha akena enlhangwa nenmamalya n-angkarr-Ø angaluba dirak=uma akwa ni-yama-Ø ni-yengba-Ø nenu-maka-Ø nungkuwa Ø-ambilya nara a-lhəka-ma	1.PRO.POSS 3M.son-1.KIN IRR.3M-go-PST=PURP but 3M.PRO.POSS 3M.person REAL.3M-run-USP from.over.there VEG.car=INST and REAL.3M-speak-USP REAL.3M-talk-USP REAL.3M>3M-say-USP 2.PRO DEON.2-stay.NPST NEG NEG.NPST-go-NEG.NPST	‘My son nearly left, however a man came from over there in a car and told him “stay, don’t go”’	JL, JRB1-075-01, 00:10:40.510-00:11:02.885	elicitation (translation task)
ngambaja	curse(someone/something)	atomic telic	COS ATM-T	b	y	PFV	x	t	ld	c lli	Narr	past	DiscCon-XTD-PST SoE	V0-PST biya:::V1-∅ V2-PST	V0-PST bi:::ya V1-∅	ying-engkəngkərre-na ngalhamba=lhangwa akəna=murradha dh-akəna Wakaba bi:::ya, ngalamba=lhangwa arakba yingənə-ngambaja-Ø dh-akəna yingən-ararika-Ø dhambulu=ma n-akəna	REAL.3F-think-PST 3F.PRO.SEQ=POSS NEUT.that=EMPH 3F-that Wakaba and.then.XTD 3F.PRO.SEQ=POSS COMPL.ACT REAL.3F>3M-curse-USP 3F-that REAL.3F>3M-tie.up-PST NEUT.feather.string=EMPH 3M-that	‘Then Wakaba kept on thinking, then it was her turn, she cursed Nenungwanjirrumiya, she cursed him to the feather string and that feather string had been tied all around him’	Akingambaja-langwa [=About Washing Ceremony], A3370a SIDE1 a5.3	narrative
larrka	send	atomic telic	COS ATM-T	b	y	PFV	x	x	x	x	Narr	past	SoE (parataxis?)	V1-∅	ABL plays a role?	narri-larrka-Ø angaluba ayakwa Umbakumba=lhangwa	REAL.3A>NEUT-send-USP from.there NEUT.language Umbakumba=ABL	‘Then from Umbakamba the people send a message from there’	Akingambaja-langwa [=About Washing Ceremony], A3370a SIDE1 a5.3	narrative
jerrədhə	get finished; become finished; be finished	atomic telic	COS ATM-T GROUP	b	y	PFV	x	t	x	cclit	Narr	past	TempSub << Matrix SoE-PST DiscCon PST	yarrungkwa V1-Ø=lhangwa V2-PST akwa V3-PST		yarrungkwa na-jerrədhə-Ø=ma school=a up at the school, yah na-jerrədhə-Ø=ma s- na-jarrə-Ø=mə=lh- na-jerrədhə-Ø=mə=lhangwa school-a wurr-a wurri-yukwujiya na-malyangke-nə=ma akwa nə-lhəwrradhə-na	yesterday REAL.3A-be.finished-USP=MUT NEUT.school=PF REAL.3A- be.finished-USP=MUT REAL.3A- be.finished-USP=MUT=ABL REAL.3A- be.finished-USP=MUT=ABL NEUT.school-a 3A-this 3A-small REAL.3A-play-PST=MUT and REAL.3A-return-PST	‘Yesterday after they finished at school, the kids played and then went home’	JL, JRB1-033-01, 00.28.42-00.29.09	elicitation (video stimuli)
angmadhə	steal	atomic telic	COS ATM-T GROUP	dna	y	PFV	x	t	x	x	Narr	past	Matrix-PST >> ObjCl-∅	V0-PST >> V1-∅		nara ka-rrəngka-Ø wurr-enjarrngalyilya nuw-angmadhə-Ø=mərrə=mərra nganyangwa diraka	NEG IRR.1>3A-see-PST 3A-boy REAL.3A>NEUT-steal-USP=DEP=PROP 1.PRO.POSS NEUT.car	‘I didn’t see the boys who stole my car’	Stokes n.d.-b: 97	elicitation (translation task)
anga	bite	atomic telic	COS ATM-T GROUP	dna	y	PFV	x	x	x	cons	BackFore / Explanation	past	Matrix-PR >> V-∅=ABL (= because)	V0-NPST >> V1-∅=ABL		na-rrangkuwangə-na=ma ayarrka dhəmərrmara ng-anga-Ø=mərrə=lhangwa	REAL.NEUT-swell-NPST=MUT NEUT.hand FEM.sandfly REAL.FEM>1-bite-PST=DEP=ABL	‘My hand is swelling up because the sandflies bit me’	Stokes n.d.-b: 117	elicitation (translation task)
akburranga	find; reach	atomic telic	COS ATM-T GROUP	b	n	PFV	x	t	l	lli	Narr	past	XTD-PST AspMod < SoE	V0-PST:::=wa V1-∅		na-lhəke-nə-ma=ka wurr-akənu:::=wa, yandha+lhangwa narr-akburranga-Ø ebina angalya Kenina	REAL.3A-go-PST=MUT=EMPH 3A-that.XTD=PL until REAL.3A-reach-USP NEUT.this NEUT.place place.name	‘They went on and on, until they reached Canaan’	Bible Society in Australia 1992: 187	narrative (text translation)
akuma	put	atomic telic	COS ATM-T GROUP	b	n	PFV	x	x	x	c	Narr	past	DisCon SoE DiscCon	ngarningka V0-PST biya V1-∅	non-atomic because of 5	ngarningka nə-lbu-lburra-nga ngəwa biya, amangbalha n-akuma-Ø	again REAL.3M-REDUP-split-PST continue and.then NEUT.five REAL.3M>NEUT-put-USP	Again he (chopped down a tree and) split it and made another five (spear shafts)	AA, A3369a Side2, a3.11 Yingarna-langwa ‘Story about a snake’	narrative
yedha	arrive	atomic telic	COS ATM-T PREP	b	y	PFV	x	t	x	x	Narr	past	PstMod	yarrungkwa V1-Ø		yarrungkwa n-akəna nenəngkwarba ni-yadhə-Ø=ma	yesterday 3M-that 3M.man REAL.3M-arrive-USP=MUT	‘He arrived yesterday’	JL, JRB1-018-01, 00.02.59-00.03.08	elicitation (translation task)
yedha	arrive	atomic telic	COS ATM-T PREP	b	y	PFV	x	x	x	x	Narr	past	∅	V1-Ø		n-akən nenəngkwarba ni-yadhə-Ø=ma Numbulwaru=manja	3M-that 3M.man REAL.3M-arrive-USP=MUT place.name=LOC	‘He arrived at Numbulwar’	JL, JRB1-018-01, 00.03.32-00.03.36	elicitation (translation task)
walka	sneak.up	atomic telic	COS ATM-T PREP	b	y	PFV	x	m	x	x	Narr	past	PstMod	arakba=wiya V1-∅		arakba=wiya yukwujə=wiya ngayuwa ngayuwa ngenu-walka-Ø-ma nganyangwa nganamjamjerrka	COMPL.ACT=QUANT little=QUANT 1.PRO 1.PRO REAL.1>3M-sneak-USP=MUT 1.PRO.POSS 3M.grandfather	‘Long time ago the child snuck up on my grandad’	CW, JRB1-001-01, 00.34.39-00.34.51	elicitation (translation task)
ngaja	hunt (down)	atomic telic	COS ATM-T PREP	b	y	PFV	x	t	x	c	Narr	past	SoE DiscCon-PST	V1-∅ akwa V2-PST V3-PST		n-aka nenəngkwarba nə-ngaja-Ø=ma yiburadha akwa ni-lhəka-rna angaly=uwa nə-dhaka-Ø=ma	3m-this 3M.man REAL.3M-hunt-USP=MUT MASC.wallaby and REAL.3M-go-PST NEUT.place=ALL REAL.3M>MASC-cook-PST=MUT	‘The man hunted the wallaby, went home, and cooked it’	JL, JRB1-034-01, 00.07.21-00.07.35	elicitation (translation task)
yedha	arrive	atomic telic	COS ATM-T PREP	b	y/n	PFV	x	t	x	cc	Narr	past	DiscCon SoE DiscCon-PST	biya V1-∅ arakba (then) V2-PST		biya ni-yadha-Ø nungw-enikba akwa yakwujina arakba nuw-ambilya adhalyuma=manja wurr-akəna=dha	and.then REAL.3M-arrive-USP 3M.father-KIN.3M and there COMPL.ACT REAL.3A-stay.PST NEUT.river=LOC 3A-that=TRM	‘And then his father arrived and they all stayed there at the river’	Kwurrirda Kwurrirda-langwa, A3369a Side1 a3.3	narrative
njurrkwa-ja	move	avertive activity / achievement non-culminating	COS ACT ATM AVERT	n	y	PFV-Weak	x	tm	x	p	Narr	past	PstMod + SoE-PST DiscCon	V-1-PST V0-PST akwa V1-Ø	PC - weak perfective	yarrungkwa n-akəna nenəngkwarba nu- ni-jura-ngu=ma- ni-jura-ngu=ma akən fridge=a akwa nə-njurrukwa-ja-Ø=ma ekena nara engkəbarrungwarrungwa akəna	yesterday 3M-that 3M.man REAL.3M>NEUT-push-PST=MUT REAL.3M>NEUT-push-PST=MUT NEUT.that NEUT.fridge=PF and REAL.3M>NEUT-move-CAUS=USP=MUT but NEG NEUT.heavy NEUT.that	‘Yesterday the man pushed the fridge and [tried to] move [it], but nothing, it was too heavy’	JL, JRB1-038-01, 00:13:47-00:14:06	elicitation (video stimuli)	REAL-push-PST=MUT + akwa + REAL-move-CAUS=USP=MUT	frustrative
njurrkwa-ja	move	avertive activity / achievement non-culminating	COS ACT ATM AVERT	n	y	PFV-Weak	x	m	x	c	Narr	past	PstMod + SoE DiscCon	arakbəwiya V0-Ø akwa V1-Ø	PC - weak perfective	arakbəwiya n-aka nenəngkwarba nu-njurr-kwa-ja-Ø=ma akəna fridge=a ekena engkəbərrungwərrungwa or kamba ngə-nekibulu-Ø=m akəna	long.ago 3M-this 3M.man REAL.3M>NEUT-move-CAUS-USP=MUT NEUT.that NEUT.fridge=PF but NEUT.heavy then REAL.3M>NEUT(?)-give.up(?)-USP=MUT NEUT.that	‘Long time ago the man [tried to] move the fridge, but it was too heavy’ or ‘and so he gave up’	JL, JRB1-038-01, 00:13:47-00:14:06	elicitation (video stimuli)		frustrative
njurrkwa-ja	move	avertive activity / non-culminating achievement	COS ACT ATM AVERT	n	y	PFV-Weak	x	t	x	c	Narr	past	SoE-PST DiscCon	V0-PST akwa V1-Ø		n-akəna nenəngkwarba ni-jura-ngu=ma akwa nu-njurr-kwa-ja-Ø=ma akəna- akəna fridge=a akena nara=dha	3M-that 3M.man REAL.3M>NEUT-push-PST=MUT and REAL.3M>NEUT-move-CAUS=USP=MUT NEUT.that- NEUT.that NEUT.fridge=PF but NEG=TRM	‘The man pushed and [tried to] move the fridge, but nothing’	JL, JRB1-038-01, 00:12:39-00:13:00	elicitation (video stimuli)	REAL-push-PST=MUT + akwa + REAL-move-CAUS=USP=MUT	frustrative
angburadha	get.tired.of(something); become.tired.of(something)	CofS	COS ATM INCH STATE	b	n	PFV	x	t	x	cc	Narr	past	DiscCon SoE DiscCon-PST	arakba V1-Ø akwa V2-PST V3-Ø ('went V3')		ngalh-aje=ka arakba ying-angburadha-Ø dhərndh-enikba akwa yingə-mungkulha yingə-mungkulhi-nga	3F.PRO-CofR=EMPH COMPL.ACT REAL.3F-get.tired-USP 3F.mother-KIN.3M and REAL.3F-sleep.PST REAL.3F-sleep-CofS	‘His mother got tired of him and went to sleep’	Kwurrirda Kwurrirda-langwa, A3369a Side1 a3.3	narrative
yakwurra	be.thirsty; get.thirsty	CofS	COS ATM INCH STATE	b	n	PFV	x	m	x	x	Narr	past	PstMod	V1-∅ alyarrəngwalyilya ('that night')		ni-yakwurra-Ø n-akəna akungwa alyarrəngwalyilya	REAL.3M-be.thirsty-USP 3M-that NEUT.water NEUT.night	‘He got thirsty [for water] during the night’	Stokes n.d.-b: 26	elicitation (translation task)
lharruwura-dha	be.late.afternoon; become.late.afternoon	CofS	COS ATM INCH STATE	b	n	PFV	x	ctx	x	c	Narr	past	SoE DiscCon	biya V1-∅	non ambiguous because of biya	biya na-lharruwura-dha-Ø arakba	and.then REAL.NEUT-afternoon-INCH-USP COMPL.ACT	‘It was late afternoon’ [i.e. it had already become late afternoon]	Bible Society in Australia 1992: 174	narrative (text translation)
lharruwura-dha	be.late.afternoon; become.late.afternoon	CofS	COS ATM INCH STATE	b	n	PFV	x	ctx	x	c	Narr	past	DiscCon SoE	kembirra V1-∅		kembirra na-lharruwura-dha-Ø arakba	then REAL.NEUT-afternoon-INCH-USP COMPL.ACT	‘Afternoon came’ [and then the sun began to set]	Bible Society in Australia 1992: 624	narrative (text translation)
lharrumur-dha	become.dark	CofS	COS ATM INCH STATE	b	n	PFV	x	m	d	cons	Narr	past	PstMod+AspMod	wurdarriya+wiya ('until morning') V1-∅	possibly lexified INCH?	na-lharrumurdha-Ø nenə-mungkwulha wurdarriya+wiya	REAL.NEUT-dark-PST REAL.3M.DU-sleep.PST morning+QUANT	‘It became dark and they slept until morning’	Bible Society in Australia 1992: 502	narrative (text translation)
enibu-dhə	be.alive; become.alive	CofS	COS ATM INCH STATE	b	n	PFV	x	ctx	x	x	Narr	past	SoE parataxis?	V1-∅		n-eniba-dhə-Ø=ma	REAL.3M-alive-INCH-USP=MUT	‘He came back to life’	JL, JRB1-077-01, 00:44:54.310-00:44:57.730	elicitation (translation task)
wangkwa-dhə	become.old	CofS	COS ATM INCH STATE	b	n	PFV	x	ctx	x	x	Narr	past	SoE parataxis?	V1-∅		n-eni-wangkwa-dhə-Ø=ma	REAL.3M-M-man-INCH-USP=MUT	‘He became an old man’ [speaker translation]	JL, JRB1-077-02, 00:03:31.138-00:03:34.828	elicitation (translation task)
rriya-dha	be.sulky; get.sulky	CofS	COS ATM INCH STATE	b	n	PFV	x	ctx	x	c	Narr	past	SoE DiscCon	biya V1-∅	Fore on previous V ; not clear if subject starts sulking then or not	biya enamba=lhangwa Arrama ni-lyangi-rriya-dha-Ø	and.then 3M.PRO.SEQ=POSS Arrama REAL.3M-head-bad-INCH-USP	‘Then it was Arrama's turn, he was sulky’	Akingambaja-langwa [=About Washing Ceremony], A3370a SIDE1 a5.3	narrative
walyuwu	be.cooked; get.cooked; be.ripe; get.ripe	CofS/inchoative state	COS ATM INCH STATE	closed max	n	PFV	x	ctx	x	c	Narr	past	DiscCon+XTD SoE	bi:::ya V1-∅		bi:::ya nu-walyuwu-Ø-manji=kba=dha, y-akina yimarndakuwaba y-inumalye=ka=dangba	and.then.TXD REAL.3M-be.cooked-USP=LOC=DENIZ=TRM MASC-that MASC.blue.tonged.lizard MASC-good?=EMPH=EMPH	‘When at last that blue-tongued lizard was cooked to perfection, it was the fattiest, juiciest blue-tongued lizard that ever was’	Kwurrirda Kwurrirda-langwa, A3369a Side1 a3.3	narrative
enibu-dhə	be.alive; become.alive	CofS/inchoative state	COS ATM INCH STATE	b	n	PERF	x	x	x	cr	Perf context	past>present	PerfMod Matrix-∅(PERF) >> ObjCl	arakba V0-∅ >> V1-∅ ('now' + result)	you have seen that I have become alive again'	yirrə-rrəngka-Ø=ma arakba ngayuwa nəng-enibu-dhə-Ø=ma amandhangwa nəngi-jungwu-Ø=mərra=dha	REAL.2A-see-PST=MUT COMPL.ACT 1.PRO REAL.1-alive-INCH-USP=MUT true REAL.1-die-USP=MUT=TRM	‘Now you have seen that I really am alive again [it’s true that I died before]’	Bible Society in Australia 1992: 890	narrative (text translation)
wara	rise; get.up	hab atomic telic	CUM STAT HAB ATM-T	dna	n	IMPFV	x	cons	hi	g	Backgr	past	AspMod Hab	V1-∅ arngkawura ('all the time')	Translation?? 'he slept well as a baby, now sometimes he gets up, sometimes he sleeps'	wurri-yukwujiya wurru-wanki-yukwujiya wurr-angariya wurr-abarda marrnga akən nə-wara-Ø-mə=dha arngkawura nu-mkulha=ma n-akən marrnga	COLL-small COLL-DIM-small COLL-baby COLL-good VEG.sleep NEUT.that REAL.NEUT-get.up-USP=MUT=TRM sometimes REAL.NEUT-sleep.NPST=MUT 3M-that VEG.sleep	‘so when he was a baby he slept all the time, now he's grown he sleeps now and then’	ST, JRB1-037-01, 00:13:59-00:14:19	elicitation (video stimuli)
angkarrə	run	hab iterated atomic telic	CUM STAT HAB PLUR ATM-T	n	y	IMPFV	x	t	li	g	Backgr	past	PstMod-XTD + AspMod Iter + SoE DiscCon	a:::rakbəwiya n-ərribərriba V0-Ø biya V1-Ø	Durative bounded?	n-aka nanəngkwarb a:::rakbəwiya n-ərribərriba n-adhakba-ja-Ø=m door=manja biya nanga wurr-akəna warnmamalya ambəlyuma aləlbaj akən=manj angalya n-angkarrə-Ø=m yedhakəna	3M-that 3M.man XTD.long.ago 3M-keep.on REAL.3M-knock-REFL-USP=MUT NEUT.door=LOC and.then ? 3A-that 3A.person NEUT.two ? NEUT.that=LOC NEUT.place REAL.3M-run-USP=MUT that.way	‘A long time ago the man used to keep knocking on the door and then the other man ran that way’	ST, JRB1-037-02, 00.19.55-00.20.07	elicitation (video stimuli)
ararurrmaja	dry(something)	hab non-atomic telic	CUM STAT HAB NATM-T	n	y	IMPFV	x	t	h	g	Backgr	past	Overlap-PST RED (Hab)	V0-PST RED-V1-Ø		yirra-rrbə-rrəngka-Ø=ma na-yan-jamarrka-Ø=ma yakwujina adhalyəma=manja narrəma-mərndak-ajirra-ngə=ma dhəmbalha-mərriya narrəma-mərndak-ara-rurrmaja-Ø=ma karrawara amarda-mirriya=manja	REAL.1A>3A-REDUP-see-PST=MUT REAL.3A-REDUP-how.to.do-PST=MUT there NEUT.river=LOC REAL.3A>VEG-many-wash-PST=MUT VEG.clothes-the.rest REAL.3A>VEG-many-REDUP-dry-USP=MUT above NEUT.grass-the.rest=LOC	‘We used to watch older women at the river wash their clothes and dry [them] on dry grasses’	JL, JRB1-007-01, 00.00.56-00.01.09	narrative
marerrəmaja	hang.out(something)	hab non-atomic telic	CUM STAT HAB NATM-T	dna	y	IMPFV	x	tm	x	cc	Backgr	past	PstMod + SoE DiscCon-PST	arakb-ərakbəwiya V1-∅ biya V2-PST biya V3-PST		arakb-ərakbəwiya dh-akan dhədharrəngka ngalang=manj angalya ying-merrəmaja-Ø-m akən dhubala biya n-akən nanəngkwarba nə-ləka-rna ngaluwə-wa biya dh-akəna yinga-ma-ng akən amdejika enuwa=lhanga	REDUP-long.ago 3F-that 3F.woman 3F.PRO=LOC NEUT.place REAL.3F-hang.out-USP=MUT NEUT.that FEM.clothes and.then 3M-that 3M.man REAL.3M-go-PST 3F.PRO=ALL and.then 3F-that 3F-take-PST NEUT.that NEUT.thing 3M.PRO=ABL	‘A long time ago the woman hung the clothes out in that place and then the man went to her and she took something from him’	ST, JRB1-037-02, 00:15:46-00:16:03	elicitation (video stimuli)
dhərra	shut; close	hab non-atomic telic	CUM STAT HAB NATM-T	dna	y	IMPFV	x	ctx	hi	g	Backgr	present	AspMod Hab/Iter	arngkababərnama ('always') V1-∅		arngkababərnama n-akəna nenəngkwarba nə-dhədhə-Ø=ma door=a	always 3M-that 3M.man REAL.3M>NEUT-shut-USP=MUT NEUT.door=PF	‘The man is always shutting the door’	JL, JRB1-049-01, 00.33.27-00.33.35	elicitation (translation task)
dhərra	shut; close	hab non-atomic telic	CUM STAT HAB INCR Q	closed	y	IMPFV	x	x	hi	g	Backgr	present	AspMod Hab/Iter	arngkababərnama ('all.the.time/many.time') V1-∅		n-akəna nenəngkwarba arngkababərnama nə-dhədhə-Ø=ma door=a	3M-that 3M.man always REAL.3M>NEUT-shut-USP=MUT NEUT.door=PF	‘[He’s] shutting the door’	JL, JRB1-049-01, 00.31.54-00.32.14	elicitation (translation task)
angkarrə	run	inchoative activity = atomic telic	COS ATM INCH ACT	dna	y	PFV	x	t	x	c	BackFore	past	PstMod + Overlap-PST SoE DiscCon	yarrungkwa V-2-PST V-1-PST V0-PST biya V1-∅	Fore on 'run'	yarrungkwa n-akən ni-yukwujiya na-rrak-ajey=m akwa nəm-arr-abərrəngka-Ø=ma m-arrakwəyabe-nə=ma maməwura biya wurr-akən wurruwarda nəw-angkarrə-Ø=m enəwa=wa	yesterday 3M-that 3M-small REAL.3M-forehead-stand.PST=MUT and REAL.3M>VEG-REDUP-look-PST=MUT REAL.VEG?-rise-PST=MUT VEG.sun and.then COLL-that COLL.dog REAL.COLL-run-USP=MUT 3M.PRO=ALL	‘Yesterday the boy was sitting and watching the sun rise, and then the dog ran up to him’	ST, JRB1-034-01, 00.04.17-00.04.27	elicitation (translation task)
angkarrə	run	inchoative activity = atomic telic	COS ATM INCH ACT	dna	y	PFV	x	t	x	c	BackFore	past	Overlap-PST SoE DiscCon	V0-PST akena V1-Ø	Back on 1st V	nu-ngurrkwa-rnə=ma yiburadh=uwa akena n-angkarra-Ø	REAL.3M>MASC-hunt-PST=MUT MASC.wallaby=ALL but REAL.MASC-run-USP	‘[The man] was hunting the wallaby, but it ran away’	ST, JRB1-034-01, 00.06.53-00.07.01	elicitation (translation task)
lhəka	go	inchoative activity = atomic telic	COS ATM INCH ACT	n	y	PFV	x	t>>	x	p	Narr	past	SoE DiscCon >> IRR.PST	V1-Ø V2-CofS-Ø akwa V3-Ø akwa V4-Ø >> V5-IRR-PST	Is V1 V2 a case of SVC?	n-akən nanəngkwarba nə-lhəka-Ø=ma n-ambarr-nga=ma akən-manja chair=a akwa nə-mədhilyakbə-Ø-ma akwa kamba nə-kw-aji-nga=ma kənə-lhəka-nə=ma	3M-that 3M.man REAL.3M-go-USP=MUT REAL.3M-sit-CofS=MUT NEUT.that=LOC chair=PF and REAL.3M-cough-USP=MUT and then REAL.3M-half(?)-be.upright-CofS=MUT IRR.3M-go-PST=MUT	‘he stood up and walked away’	ST, JRB1-037-01, 00:31:11-00:31:21	elicitation (video stimuli)
engkərrka	think; listen	inchoative activity = atomic telic	COS ATM INCH ACT	n	y	PFV	x	t	x	c	Narr	past	SoE-PST DiscCon	V0-PST akwa V1-∅		ngayuwa ng-arda-ngu-ma James=wa akwa n-engkərrka-Ø	1.PRO REAL.1-call.out-PST=MUT James=ALL akwa REAL.3M-listen-USP	‘I called out to James, and he listened’	ST, JRB1-054-01, 00.23.45-00.24.05	elicitation (translation task)			(in response to ‘could we also say nakəna James-a ningkərrka? [enenuwiya]’ where ST replies ‘no, no, if I was calling out to you I'd use that sentence, ngayuwa ngardanguma James-wa akwa nengkərrka’)
angkarrə	run	inchoative activity = atomic telic	COS ATM INCH ACT	b	y	PFV	x	ctx	x	p	Narr	past	SoE-RED parataxis	V0-RED-∅ V1-∅		na-lhawu-lhawurradh-Ø, nuw-angkarra-Ø	REAL.NEUT-REDUP-return-USP REAL.NEUT-run-USP	‘It [the mother cat] kept going back, it ran off’	GL, A3369a Side 1 a3.4, Bujikeda ‘Mother cat’, 00.07.28-00.07.32	narrative
njurrkwa-ja	move	iterated activity	CUM PLUR ACT	n	y	IMPFV	x	tm	di	it	Narr? Backgr?	past	IterationV-PST + PstMod	mamawura ('day') lharrma-PST V1-∅	larrma or lharrma? + Translation	n-akəna nenəngkwarba nəma-larrma-ngu-ma mamawura ni-jara-ngu=ma or ni-njurrkwa-ja-Ø=ma akəna fridge	3M-that 3M.man REAL.3M>VEG-do.all.day- PST=MUT VEG.day REAL.3M>NEUT-push-PST=MUT REAL.3M>NEUT-move-CAUS-USP=MUT NEUT.that NEUT.fridge	‘The man was pushing and moving the fridge all day’	JL, A JRB1-038-01, 00:10:29-00:10:37	elicitation (video stimuli)
adhərrə	spear; pierce	iterated atomic telic	BD PLUR ATM-T	dna	y	PFV	x	ctx	il	it lli	Narr	past	AspMod-PST XTD SoE DiscCon-PST	ngaw V0-RED-PST XTD-V1-∅ ekena V1-∅ kemba NEG V2-IRR-PST		ni-yen-jem-Ø ngaw n-a:::dhərra-Ø=m akən jurra ekena ne-jerrədhə-Ø=m akən jurr- jurra kemba nara=b kən-adhərre-na	REAL.3M-REDUP-do-PST CONT.ACT REAL.3M>NEUT-XTD.spear-USP=MUT NEUT.that NEUT.paper but REAL.3M-be.finished-USP=MUT NEUT.that NEUT.paper NEUT.paper then NEG=EMPH IRR.3M>NEUT-spear-PST	‘He kept on piercing the paper bag, but then he finished, then he didn’t pierce [it] anymore’	ST, JRB1-037-01, 00:25:09-00:25:18	elicitation (video stimuli)
lhəka	go	iterated atomic telic	BD PLUR ATM-T	dna	n	PFV	x	ctx	x	it	Narr	past	SoE parataxis?	ngaringka V1-∅ V1-∅		ngaringka yingə-lhəka-Ø yingə-lhəka-Ø	again REAL.3F-go-USP REAL.3F-go-USP	‘She kept on going’	Stokes 1971: 31	elicitation (translation task)
marrakaja	grab; take	iterated atomic telic	BD PLUR NATM-T	dna	y	PFV	x	t	di	c	Narr	past	AspMod SoE DiscCon-PST	keep.on ngawa (CONT) V-1-∅ angkəbəbərnama ('all day') ankgwabəbənama V0-PST biya V1-∅ keep.on V2-PST ngewa		dh-akən dhədharrəngka dhə-rribərrib ngəw ying-merrəmaja-Ø=ma-m a-md-akən dhumbala angkəbəbərnama biya n-akən nanəngkwarba ankgwabəbənama nu-wilyaka-Ø=m ayika biya dh akən dhədharra yingi-na-marrakaja-Ø=m dh-ərribərrib a-mdh-akən ayik=dha yengi-yenja-Ø=m ngəwa=dha	3F-that 3F.woman 3F-keep.on CONT.ACT REAL.3F-hang.out-USP=MUT-? NEUT-many-that FEM.clothes all.day and.then 3M-that 3M.man all.day REAL.3M-carry-PST=MUT NEUT.tree and.then 3F-that 3F.woman REAL.3F-3M-grab-USP=MUT 3F-keep.on NEUT-many-that NEUT.tree=TRM 3F-do-PST=MUT CONT.ACT=TRM	‘The woman kept on hanging out the clothes all day, and then the man took the stick and the woman grabbed it’	ST, JRB1-037-02, 00:17:13-00:17:31	elicitation (video stimuli)
ardija-ja	call(someone)	iterated atomic telic	CUM PLUR ATM-T	dna	y	IMPFV	x	x	x	r	Back/Explanation	present	Question - PR	V-1-PST V0-PST V1-∅	Perfect-inferential context	aba ni-yamarrka-Ø-me=ka n-aka, ni-yamarrka-Ø-murra=bena n-ardija-ju-Ø-murra?	NEUT.that.over.there REAL.3M-doing.what-PST=MUT=EMPH 3M-this REAL.3M-doing.what-PST=MUT=EMPH REAL.3M-call-USP=MUT	“Oh! What's happened to him, what is he calling for?”	Kwurrirda Kwurrirda-langwa, A3369a Side1 a3.3	narrative
lhəka	go	iterated atomic telic	CUM PLUR ATM-T	dna	y	IMPFV?	x	m	hi	x	Backgr (Hab)?	past	PstMod + AspMod	arakbəwiya angkabəbərnama V1-Ø		arakbəwiya angkabəbərnama nə-lhəka-Ø en=lhang=wa angalya	long.ago always REAL.3M-go-USP 3M.PRO=POSS=ALL NEUT.place	‘like several times, many times, or several times he used to- went- walked to his house’	JL, JRB1-049-01, 00.13.00-00.13.20	elicitation (translation task)
anga	bite	iterated atomic telic	CUM PLUR ATM-T?	n	y	IMPFV	m	x	x	x	Backgr	present	PrMod	enenuwiya V1-∅	possibly a translation issue here…	enenuwiya wurr-akəna wurruwarda nan-anga-Ø n-akəna nenjarrngalya	now COLL-that COLL.dog REAL.COLL>3M-bite-USP 3M-that 3M.boy	‘The dog is biting the boy now’	ST, JRB1-054-01, 00.13.10-00.13.14	elicitation (flash card stimuli)
anga	bite	iterated atomic telic	CUM PLUR ATM-T?	n	y	IMPFV	x	x	x	x	Backgr	present	∅?	V1-∅	possibly a translation issue here…	nənenəngkwarba nəm-anga-Ø=ma muwadha	3M.man REAL.3M>VEG-bite-USP=MUT VEG.dilly.bag	he's biting the dilly bag’	ST, JRB1-057-01, 00.02.26-00.02.47	elicitation (translation task)
lhawurradhə	return	iterated atomic telic bounded	BD PLUR ACT MAX	dna	y	PFV	x	ctx	x	pit	Narr	past	SoE-RED parataxis	V1-RED-∅ V2-∅		na-lhawu-lhawurradh-Ø, nuw-angkarra-Ø	REAL.NEUT-REDUP-return-USP REAL.NEUT-run-USP	‘It [the mother cat] kept going back, it ran off’	GL, A3369a Side 1 a3.4, Bujikeda ‘Mother cat’, 00.07.28-00.07.32	narrative
lhəka	go	iterated atomic telic max	BD CUM PLUR ATM-T MAX	dna	y	PFV	x	ctx	hi	x	Narr	past	AspMod	angkawura ('all.the.time') angkwababərna ('every day') V1-Ø	corrected glosses for angkawura + angkwababərna	angkawura angkwababərna nə-lhəka-Ø en=lhang=wa angalya	all.the.time always REAL.3M-go-USP 3M.PRO=POSS=ALL NEUT.place	‘he went to his house several times’	JL, JRB1-049-01, 00.09.25-00.09.34	elicitation (translation task)
lhəka	go	iterated atomic telic or hab atomic telic	CUM STAT HAB ATM-T	dna	y	IMPFV	x	ctx	hi	x	Narr? Backgr?	past	AspMod	angkawura ('all the time') angkwababərnama ('every day') V1-Ø	corrected glosses for angkawura + angkwababərna	angkawura angkabəbərnama nə-lhəka-Ø en=lhang=wa angalya	all.the.time always REAL.3M-go-USP 3M.PRO=POSS=ALL NEUT.place	‘he always went from his place’	JL, JRB1-049-01, 00.11.56-00.12.05	elicitation (translation task)
lhəka	go	iterated atomic telic or hab atomic telic	CUM STAT HAB ATM-T	dna	y	IMPFV?	x	ctx	hi	x	Backgr?	past	AspMod	angkabəbərnama ('every day') V1-Ø		angkabəbərnama nə-lhəka-Ø en=lhang=wa angalya always	always REAL.3M-go-USP 3M.PRO=POSS=ALL NEUT.place	‘he went to his house, several times, he went to his house’	JL, JRB1-049-01, 00.12.28-00.12.44	elicitation (translation task)
ngwurrukbalija	open(something)	iterated non-atomic telic	CUM STAT HAB NATM-T	n	y	IMPFV?	x	tm	ir	it	Backgr?	past	PstMod AspMod Iter-XTD-PST + RED.Echo	a:::rakbəwiya V1-∅ V2-XTD-PST ('do-ITER')		a:::rakbəwiya n-aka nanəngkwarba nu:::-ngurrkbalija-Ø=m akən fridge=la door=a ni-yen-jama:::-Ø nu-ngurrbalija-Ø=ma ni-dharra-Ø-ma ani nu-ngurrbalija-Ø=ma nganing ni-dharra-Ø=ma arakb-urakbəwiya	XTD.long.ago 3M-that 3M.man REAL.3M>NEUT.XTD-open-USP=MUT NEUT.that NEUT.fridge=LOC NEUT.door=PF REAL.3M-REDUP-do.XTD-PST REAL.3M>NEUT-open-USP=MUT REAL.3M>NEUT-close-USP=MUT ? REAL.3M>NEUT-open-USP=MUT ? REAL.3M>NEUT-close-USP=MUT REDUP-long.ago	‘a long, long time ago the man opened and closed the fridge over and over again’	ST, JRB1-037-02, 00:07:01-00:07:21	elicitation (video stimuli)
marerrəmaja	hang.out(something)	iterated non-atomic telic bounded	BD PLUR NATM-T?	n	y	PFV	x	t	di	cc	Narr	past	AspMod + SoE DiscCon-PST	dhə-rribərrib ngəw 1-Ø biya V2-PST biya V3-Ø		dh-akən dhədharrəngka dhə-rribərrib ngəw ying-merrəmaja-Ø=ma-m a-md-akən dhumbala angkəbəbərnama biya n-akən nanəngkwarba ankgwabəbənama nu-wilyaka-Ø=m ayika biya dh akən dhədharra yingi-na-marrakaja-Ø=m dh-ərribərrib a-mdh-akən ayik=dha yengi-yenja-Ø=m ngəwa=dha	3F-that 3F.woman 3F-keep.on CONT.ACT REAL.3F-hang.out-USP=MUT-? NEUT-many-that FEM.clothes all.day and.then 3M-that 3M.man all.day REAL.3M-carry-PST=MUT NEUT.tree and.then 3F-that 3F.woman REAL.3F-3M-grab-USP=MUT 3F-keep.on NEUT-many-that NEUT.tree=TRM 3F-do-PST=MUT CONT.ACT=TRM	‘The woman kept on hanging out the clothes all day, and then the man took the stick and the woman grabbed it’	ST, JRB1-037-02, 00:17:13-00:17:31	elicitation (video stimuli)
ngərandha	cut.up	iterated non-atomic telic unbounded	CUM PLUR NATM-T?	n	y	IMPFV	x	tm	x	it	Backgr	past	PstMod + IterPred	yarrungkwa V1-∅ n-ərribərriba ('keep on')		n-aka nənəngkwarba yarrungkwa nə-ngərandha-Ø=m akən bread=a n-ərribərriba	3M-that 3M.man yesterday REAL.3M>NEUT-cut.up-USP=MUT NEUT.that NEUT.bread=PF 3M-keep.on	‘Yesterday the man kept on cutting up the bread’	ST, JRB1-038-01, 00:04:17-00:04:25	elicitation (video stimuli)
ruk+wulyaka-ja	stir; spin; turn.around	iterated semelfactive	CUM PLUR SEM UBD	n	y	IMPFV	x	tm	x	co	BackFore	past	Sim-PST Overlap-PST	V0-PST akwa V1-Ø, V2-PST akwa V3-PST	Bck on 'stir'	yarrungkwa nu-wilyaba nenəngkwarba nə-murrkulhə=ma eni=lhang=ma murrkwa akwa nə-rukwi+lyakaja-Ø=ma anhənga en-aja nu-wilyaba nenəngkwarba nə-lhəke-na akwa nə-kwa+bijangu-nə=ma	yesterday 3M-one 3M.man REAL.3M-lie.down.PST=MUT 3M.PRO=POSS=INST VEG.stomach and REAL.3M-stir-USP=MUT NEUT.food 3M.PRO-CofR 3M-one 3M.man REAL.3M-go-PST and REAL.3M-jump-PST=MUT	‘yesterday the man was lying down on his stomach, he stirred the food, [and] another man went past and jumped’	CW, JRB1-032-01, 00.21.23-00.22.05	elicitation (video stimuli)
ruk+wulyaka-ja	stir; spin; turn.around	iterated semelfactive	CUM PLUR SEM UBD	n	y	IMPFV	x	t	x	o	BackFore	past	Back-Fore-PST Overlap-PST DiscCon	V0-Ø V1-PST	Fore on following V	n-akəna nenəngkwarba nu-rukwi+lyakaja-Ø=ma anhənga ena-ja nu-wilyaba nenəngkwarba nenu-kwa-Ø=ma ayika	3M-that 3M.man REAL.3M>NEUT-stir-USP=MUT NEUT.food 3M.PRO-CofR 3M-one 3M.man REAL.3M>3M-give-PST=MUT NEUT.stick	‘The man stirred the food and the other man gave him the stick’	CW, JRB1-032-01, 00.28.50	elicitation (video stimuli)
ruk+wulyaka-ja	stir; spin; turn.around	iterated semelfactive	CUM PLUR SEM UBD	n	y	IMPFV	x	tm	x	co	BackFore	past	PstMod + SoE-PST parataxis + SoE DiscCon	yarrungkwa V1-Ø V2-PST akwa V3-Ø	Bck on 'stir'	yarrungkwa n-akəna nenəngkwarba nu-rukwi+lyakaja-Ø=ma anhənga ene-ja nu-wilyaba nenəngkwarba nenu-kwa-Ø=ma ayika akwa nu-rukwu+lyakaja-Ø=ma	yesterday 3M-that 3M.man REAL.3M>NEUT-stir-USP=MUT NEUT.food 3M.PRO-CofR 3M-one 3M.man REAL.3M>3M-give- PST=MUT NEUT.tree and REAL.3M>NEUT-stir-USP=MUT	‘the man was stirring the food, the other man give him a stick, and he kept stirring the food’	CW, JRB1-032-01, 00.29.45	elicitation (video stimuli)
ruk+wulyaka-ja	stir; spin; turn.around	iterated semelfactive	CUM PLUR SEM UBD	n	y	IMPFV	x	ctx	i	x	Backgr?	past	AspMod + Overlap DiscCon	akwa n-irribərriba (3sg.keep.on) V1-∅		akwa n-irribərriba nu-rukwə+lyakaja-Ø=ma	and 3M-keep.on REAL.3M>NEUT-stir-USP=MUT	‘he was keep on stirring’	CW, JRB1-032-01, 00.30.45	elicitation (video stimuli)
knock-əm-dha	knock	iterative semelfactive	CUM PLUR ACT	dna	y	IMPFV?	x	ctx	i	c	BackFore + SoE	past	IterMod + Overlap SoE DiscCon	n-ərribərriba ('keep.on') V1-∅ biya V2-∅		n-akən neniyuwangkwa n-ərribərriba nə-knock-əm-dha-Ø-m door-manja biya n-aka nanəngkwarba n-angkarrə-Ø=ma yadhakəna	3M-that 3M.old.man 3M-keep.on REAL.3M>NEUT-knock-TRVSR-BLI-USP=MUT NEUT.door-LOC and.then 3M-that 3m.man REAL.3M-run-USP=MUT that.way	‘The old man kept on knocking on the door, and then the man ran past’	ST, JRB1-037-02, 00:18:49-00:18:57	elicitation (video stimuli)
dhakba-jangu	grind; knock [+REFL]	iterative semelfactive	CUM PLUR ACT	dna	y	IMPFV	x	ctx	i	it	Backgr?	past	IterPred PstC	V1-∅ ngəwa ('continue') keep.on		n-aka nanəngkwarba na-dhakba-jangu-Ø=m door=man ngəwa n-ərribərrib=dha	3M-that 3M.man REAL.3M-knock-REFL-USP=MUT NEUT.door=LOC CONT.ACT 3M-keep.on=TRM	‘The man kept on knocking on the door’	ST, JRB1-037-02, 00:18:25-00:18:32	elicitation (video stimuli)
dhakba-jangu	grind; knock [+REFL]	iterative semelfactive	CUM PLUR ACT	dna		IMPFV	x	ctx	i	cit	Backgr?	past	IterPred + SoE DiscCon PstC	V1-∅ n-ərribərriba (3keep.on) biya V2-∅		n-aka nanəngkwarba n-adhakba-jangu-Ø=ma yerrkam- ayerrka=ma akən=men door=a n-ərribərriba biya n-aka nanəngkwarba n-angkarrə-Ø=m yedhakənaya	3M-that 3M.man REAL.3M-knock-REFL-USP=MUT NEUT.hand=INST NEUT.that=LOC NEUT.door=PF 3M-keep.on and.then 3M-that 3M.man REAL.3M-run-USP=MUT that.way	‘The man kept on knocking with his hand on the door, and then the other man ran past’	ST, JRB1-037-02, 00:19:08-00:19:18	elicitation (video stimuli)
dhakba-jangu	grind; knock [+REFL]	iterative semelfactive	CUM PLUR ACT	dna	y	IMPFV	x	tm	x	co	Backgr	past	PstMod SoE DiscCon-PST	adhuwaba V1-∅ biya V2-PST	There is something off in the translation here, given the follow up event in the past. 'adhuwaba' is actually a recent past	n-aka nanəngkwarba adhuwaba nə-dhakba-jang-Ø=m akən=man door=a biya n-akən nu-wilyab nanəngkwarba edhəkəna nə-majuwa-nə=ma	3M-this 3M.man today REAL.3M-knock-REFL-USP=MUT NEUT.that=LOC NEUT.door=PF and.then 3M-that 3M-one 3M.man that.way REAL.3M-walk-PST=MUT	‘Today the man was knocking on the door, and then the other man walked past’	ST, JRB1-037-02, 00:19:27-00:19:35	elicitation (video stimuli)
dhakba-jangu	grind; knock [+REFL]	iterative semelfactive	CUM PLUR ACT	dna	y	IMPFV	x	m	hi	cit	Backgr	past	PstMod Iter/HabPred	a:::rakbəwiya n-ərribərriba ('3M-keep.on) V1-∅ biya V2-∅	not LLI?	n-aka nanəngkwarb a:::rakbəwiya n-ərribərriba n-adhakba-ja-Ø=m door=manja biya nanga wurr-akəna warnmamalya ambəlyuma aləlbaj akən=manj angalya n-angkarrə-Ø=m yedhakəna	3M-that 3M.man XTD.long.ago 3M-keep.on REAL.3M-knock-REFL-USP=MUT NEUT.door=LOC and.then ? 3A-that 3A.person NEUT.two ? NEUT.that=LOC NEUT.place REAL.3M-run-USP=MUT that.way	‘A long time ago the man used to keep knocking on the door and then the other man ran that way’	ST, JRB1-037-02, 00:19:55-00:20:07	elicitation (video stimuli)
ngwurrukbalija	open(something)	non-atomic telic	BD PLUR NATM-T	dna	y	PFV	x	t	i	cit	Narr	past	IterPred SoE DiscCon-PST	n-ərribərriba ('3M.keep.on') V1-∅ akena V2-PST		n-aka nanəngkwarba n-ərribərriba nu-ngwurrubalija-Ø=m akən door=a akena ni-kamadhə-nə=ma	3M-that 3M.man 3M-keep.on REAL.3M>NEUT-open-USP=MUT NEUT.that NEUT.door=PF then REAL.3M-feel.upset-PST-MUT	‘The man kept on opening the fridge and felt sad’	ST, JRB1-037-02, 00:11:48-00:12:02	elicitation (video stimuli)
ngwurrukbalija	open(something)	non-atomic telic	BD PLUR NATM-T	dna	y	PFV	x	t	ilr	cit	Narr	past	Matrix-PST >> ObjCl-∅ SoE DiscCon-PST	kamb arakba V-1-XTD-PST biya V0-XTD-PST >> V1-∅ akena V2-PST	akena here = but	kamb arakba ni-yen-jama:::-Ø biya n-aka nanungkwarba neni-bəkədha ni-yen-jama-Ø nungurru- ni-ngiyandha-ngu nu-ngurrbalija-Ø-m akən door akena ni-karradhu-nə=ma	then COMPL.ACT REAL.3M-REDUP-do.XTD-PST and.then 3M.that 3M.man 3M-crazy REAL.3M-REDUP-do.XTD-PST REAL.3M-want-PST REAL.3M>NEUT-open-USP=MUT NEUT.that NEUT.door but 3M-unable.to.do(?)-PST=MUT	‘The man kept on trying to open the fridge door, he was a crazy man, but he wasn’t able to’	ST, JRB1-037-02, 00:12:21-00:12:40	elicitation (video stimuli)
bulwanda	bend.down	non-atomic telic	COS INCR I	closed max	y	IMPF	x	t	x	x	Backgr	present	∅	V1-Ø		ne-bulwanda-Ø=ma	REAL.3M-bend.down-USP=MUT	‘[he’s] bending down’	JL, JRB1-023-01, 00.35.26-00.35.32	elicitation (video stimuli)
lung+kwabija	grow; plant	non-atomic telic	COS INCR I	closed max	n	PERF	x	x	x	r	Perf context	past>present	∅ PerfectMod	V1-∅ < arakba PROP		akəna eyika ebina ngaya ngu-lung+kwabija-Ø=ma dhukwa arakba akəna enuwə- enungkuraba akwa a-warnk-amiyerra nuw-ambilyu=m=ba biya yakwujina dhuk enukurab akən abab dhuku ne-ngkə+larra-Ø ajurungku=dha	NEUT.that NEUT.tree NEUT.that.same 1.PRO REAL.1-grow-USP=MUT maybe COMPL.ACT NEUT.that NEUT.old and NEUT-DIM-long.time REAL.NEUT-stay.PST=MUT=EMPH and.then there maybe NEUT.old NEUT.that COMPL.ACT maybe REAL.NEUT-?+fall-USP NEUT.ground=TRM	‘The tree grew already, maybe it’s already old, maybe it fell down to the ground’	JL, JRB1-042-01, 00:14:38-00:14:56	elicitation (translation task)
kw+arrangə	cut	non-atomic telic	COS INCR Q	closed max	y	PFV	x	m	x	x	Narr	past	PstMod	yarrungkwa V1-Ø	probably not an achievement	yarrungkwa n-akəna nenəngkwarba nu-kw+arrangu-Ø=ma amamərerra ayika	yesterday 3M-that 3M.man REAL.3M>NEUT-half+cut-USP=MUT NEUT.branch NEUT.tree	‘The man cut the branch of a tree’	JL, JRB1-024-01, 00.23.12-00.23.34	elicitation (video stimuli)
wərumbi-ja	cover.something	non-atomic telic	COS INCR Q	closed max	y	PFV	x	tm	x	c	Narr	past	PstMod SoE-PST DiscCon	yarrungkwa V0-PST akwa V1-Ø		yarrungkwa n-aka nenəngkwarba nə-lyinga-Ø=ma akəna lyelyinga en=lhang=manja ayerrka akwa nu-wərumbi-ja-Ø=ma akəna lyelyinga jurra=ma	yesterday 3M-this 3M.man REAL.3M>NEUT-hold-PST=MUT NEUT.that NEUT.knife 3m.PRO=POSS=LOC NEUT.hand and REAL.3M-cover-CAUS-USP=MUT NEUT.that NEUT.knife NEUT.paper=INST	‘Yesterday the man held the knife in his hand and covered it with the paper’	JL, JRB1-029-03, 00.05.38-00.06.07	elicitation (video stimuli)
dhakba-jangu	grind; knock [+REFL]	non-atomic telic	COS INCR Q	n	y	PFV	x	ctx	x	x	Narr	past	∅?	V1-Ø		nə-dhakba-jangu-Ø=ma	REAL.3M-grind-REFL-USP=MUT	‘[he] ground up [the food]’	JL, JRB1-029-03, 00.27.50-00.27.53	elicitation (video stimuli)
marerrəmaja	hang.out(something)	non-atomic telic	COS INCR Q	closed max	y	PFV	x	ctx	x	x	Narr	past	∅?	V1-Ø		dh-akəna dhədharrəngka yingu-marerrəmaja-Ø=ma dumbala line=manja	3F-that 3F.woman REAL.3F-hang.out-USP=MUT FEM.clothes NEUT.line=LOC	‘The woman hung out the clothes on the line’	CW, JRB1-032-01, 00.24.19	elicitation (video stimuli)
marerrəmaja	hang.out(something)	non-atomic telic	COS INCR Q	closed max	y	PFV	x	t	x	x	Narr	past	∅?	V1-Ø		yarrungkwa dh-akəna dhədharrəngka ying-mərerrəmaja-Ø=ma dumbala	yesterday 3F-that 3F.woman REAL.3F-hang.out-USP=MUT FEM.clothes	‘The woman hung out the clothes’	CW, JRB1-032-01, 00.25.29	elicitation (video stimuli)
marerrəmaja	hang.out(something)	non-atomic telic	COS INCR Q	closed max	y	PFV	x	t	x	c	Narr	past	SoE DiscCon-PST	V1-Ø aken V2-PST		dh-akan dhədharrəngka ying-merrimaja-Ø=ma dhumbala aken n-aka nanəngkwarba nangə-kwa-Ø-m dejik=dha	3F-that 3F.woman REAL.3F-hang.out-USP=MUT FEM.clothes then 3M-that 3M.man REAL.3M>3F-give-PST=MUT NEUT.thing=TRM	‘The woman hung the clothes out, then the man gave her something’	ST, JRB1-032-01, 00:13:13-00:13:31	elicitation (video stimuli)
marerrəmaja	hang.out(something)	non-atomic telic	COS INCR Q	closed max	y	PFV	x	tm	x	cc	Narr	past	PstMod + SoE DiscCon-PST	yarrungkwa V1-Ø akəna V2-PST biya V3-PST		dh-akən dhədharrəngka yarrungkwa ying-merrəmaju-Ø=ma akəna dhumbala biya n-akəna nanəngkwarba ni-ləka-n ngaluwə-wa biya yinga-ma-ng akəna amdejika	3F-that 3F.woman yesterday REAL.3F-hang.out-USP=MUT NEUT.that FEM.clothes and.then 3M-that 3M.man REAL.3M-go-PST 3F.PRO=ALL and.then REAL.3F-take-PST NEUT.that NEUT.that	‘Yesterday the woman hung out the clothes and then the man went to her and took something from her’	ST, JRB1-037-02, 00:15:10-00:15:27	elicitation (video stimuli)
arrangba	collect	non-atomic telic	COS INCR Q	closed max	y	PFV	x	tm	x	c	Narr	past	PstMod + SoE DiscCon-PST	yarrungkwa V1-Ø akwa V2-PST akwa V3-PST		yarrungkwa n-akən nenəngkwarba n-arrangba-Ø=ma ayika-murriya akwa nə-ləraka-Ø angwura akwa nə-dhaka-Ø amadhangkwa yiburadha=lhangwa	yesterday 3M-that 3M.man REAL.3M-collect-USP=MUT NEUT.tree-the.rest and REAL.3M-light.fire-PST NEUT.fire and REAL.3M-cook-PST NEUT.meat MASC.wallaby=POSS	‘Yesterday the man collected the firewood, made a fire, and roasted the wallaby meat’	JL, JRB1-034-01, 00.20.02-00.20.37	elicitation (translation task)
kw+arrangə	cut	non-atomic telic	COS INCR Q	closed max	y	PFV	x	ctx	x	x	Narr	past	∅?	V1-∅		dh-akəna dhədharrəngka yungu-kw+arrangu-Ø=ma bread=a	3F-that 3F.woman REAL.3F>NEUT-half+cut-USP=MUT NEUT.bread=PF	‘The woman cut the bread’	JL, JRB1-032-01, 00:02:22-00:02:29	elicitation (translation task)
ngkə+lharrə	fall	non-atomic telic	COS INCR Q	closed max	y	PFV	x	t	x	c	Narr	past	SoE-PST DiscCon	V0-PST akwa V1-Ø		n-aka nənəngkwarba ma-rəngadha-ngu=ma banana=lhangwa mama ayika akwa nəmi-ngkə+lharrə-Ø=m=dha	3M-this 3M.man REAL.3M>VEG(?)-cut.up-PST=MUT banana=ABL VEG.trunk NEUT.tree and REAL.VEG-?+fall-USP=MUT=TRM	‘The man cut up the banana tree and [it] fell down’	ST, JRB1-029-03, 00.20.42	elicitation (video stimuli)
ngwurrukbalija	open(something)	non-atomic telic	COS INCR Q	closed max	y	PFV	x	t	x	co	ForeBack/Explanation	past	SoE Overlap-PST	V1-∅ V2-PST		n-aka nanəngkwarba nu-ngwurrukbalija-Ø=ma akəna door=a akəna frigereyda n-abəringke-nə=m anhənga	3M-this 3M.man REAL.3M>NEUT-open-USP=MUT NEUT.that NEUT.door=PF NEUT.that NEUT.refrigerator REAL.3M-look.for-PST=MUT NEUT.food	‘The man opened the fridge door, looking for food’	ST, JRB1-037-02, 00:05:13-00:05:23	elicitation (video stimuli)
ngwurrukbalija	open(something)	non-atomic telic	COS INCR Q	closed max	y	PFV	x	tm	x	co	ForeBack/Explanation	past	PstMod SoE GoalSub-IRR-PST	yarrungkwa V1-∅ V2-IRR-PST=PURP		n-aka nanəngkwarba yarrungkwa nu-ngwurrkablija-Ø=ma akən door=a akən fridge=a kajungwa kən-abərungke-ni=yadh anhənga	3M-that 3M.man yesterday REAL.3M>NEUT-open-USP=MUT NEUT.that NEUT.door=PF NEUT.that NEUT.fridge=PF so.that IRR.3M-look.for-PST=PURP NEUT.food	‘Yesterday the man opened the fridge door, in order to look for food’	ST, JRB1-037-02, 00:05:28-00:05:36	elicitation (video stimuli)
ngwurrukbalija	open(something)	non-atomic telic	COS INCR Q	closed max	y	PFV	x	t	dir	it lli	Narr	past	AspMod Iter SoE-PST + Overlap-PST	n-ərribərriba (3sg.keep.on) arngkəbəbərnama ('many.time') V1-∅ V2-PST V3-PST V4-∅ V5-PST V6-∅		n-aka nanəngkwarba n-ərribərriba arngkəbəbərnama nu-ngwurrkbalija-Ø-ma akən door akəna fridge-a n-abəringke-nə-m anhənga nə-dhərra-ngə=wanə nu-ngwurrkbalija-Ø=ma nə-dhərra-ngə=wanə nu-ngwurrkbalija-Ø-ma n-ərribərriba arngkəbəbənama	3M-that 3M.man 3M-keep.on all.day REAL.3M>NEUT-open-USP=MUT NEUT.that NEUT.door NEUT.that NEUT.fridge REAL.3M-look.for-PST=MUT NEUT.food REAL.3M>NEUT-close-PST=EMPH? REAL.3M>NEUT-open-USP=MUT REAL.3M>NEUT-close-PST=EMPH? REAL.3M>NEUT-open-USP=MUT 3M-keep.on all.day	‘he opened it and he closed it, he opened it and he closed it, he closed the door, opened it, kept going all day’	ST, JRB1-037-02, 00:05:51-00:06:10	elicitation (video stimuli)
ngwurrukbalija	open(something)	non-atomic telic	COS INCR Q	closed	y	PFV	x	tm	x	c	Narr	past	SoE DiscCon-PST	V1-∅ kina ('then') V2-PST		n-aka nenəngkwarba n-ambijangaja-Ø-ma akəna brijərayda=lhanga door=a kina ni-kamadhə-nə=ma	3M-that 3M.man REAL.3M>NEUT-open-USP=MUT NEUT.that NEUT.refridgerator=POSS NEUT.door=PF then REAL.3M-feel.upset-PST-MUT	‘The man opened the fridge and felt sad’	CW, JRB1-037-02, 00:10:36-00:10:46	elicitation (video stimuli)
ngwurrukbalija	open(something)	non-atomic telic	COS INCR Q	closed	y	PFV	x	t	x	p	Narr	past	SoE-PST parataxis	enenuwiya ('now') V-1-NPST ekena V0-PST V1-∅	not a very coherent example? Or speaker 'lapses' into PST as soon as SoE?	enenuwiya akən nə-ngwurrbalij-na=m akəna door=a ekena ni-kamadhə-nə=ma nanəkabə- ənəngudh- nə-ngurrbaliji-Ø=yedha akəna akudhijung door=a akənə=ng brijərayda=dha	now NEUT.that REAL.3M>NEUT-open-NPST=MUT NEUT.that NEUT.door=PF then REAL3M-feel.upset-PST=MUT REAL.3M>NEUT-open-USP=PURP NEUT.that NEUT.door NEUT.door=PF NEUT.that=POSS NEUT.refridgerator=TRM	‘The man opened the door just now and felt upset’	ST, JRB1-037-02, 00:09:55-00:10:23	elicitation (video stimuli)
dhərra	shut; close	non-atomic telic	COS INCR Q	closed	y	PFV? IMPFV?	x	x	x	x	Narr? Backgr?	present	∅?	V1-∅	Perfective present?	n-akəna nenəngkwarba nə-dhərrə-Ø=ma akəna door=a	3M-that 3M.man REAL.3M>NEUT-shut-USP=MUT NEUT.that NEUT.door=PF	‘The man closes the door’	JL, JRB1-049-01, 00.31.23-00.31.30	elicitation (translation task)
dhərra	shut; close	non-atomic telic	COS INCR Q	closed	y	PFV? IMPFV?	x	x	x	x	Narr? Backgr?	present	∅?	V1-∅	Perfective present?	n-akəna nenəngkwarba nə-dhərru-Ø=ma akəna door=a	3M-that 3M.man REAL.3M>NEUT-shut-USP=MUT NEUT.that NEUT.door=PF	‘The man closes the door’	JL, JRB1-049-01, 00.30.49-00.30.59	elicitation (translation task)
dhərra	shut; close	non-atomic telic	COS INCR Q	closed	y	PFV? IMPFV?	x	x	x	x	Narr? Backgr?	present	∅?	V1-∅	Perfective present?	nə-dhədhə-Ø=ma	REAL.3M>NEUT-shut-USP=MUT	‘He closes the door’	JL, JRB1-049-01, 00.31.33-00.31.36	elicitation (translation task)
dhərra	shut; close	non-atomic telic	COS INCR Q	closed max	y	IMPFV	m	x	x	x	Backgr	present	PrMod	adhənuba V1-∅		n-akəna nenəngkwarba adhənuba nə-dhədhə-Ø=ma door=a akəna door=a	3M-that 3M.man today REAL.3M>NEUT-shut-USP=MUT NEUT.door=PF NEUT.that NEUT.door=PF	‘Today the man is shutting the door’	JL, JRB1-049-01, 00.36.03-00.36.16	elicitation (translation task)
dhərra	shut; close	non-atomic telic	COS INCR Q	closed max	y	PFV	x	tm	ir	it lli	Narr	past	PstMod + IterPred + XTD + SoE parataxis-PST	a:::rakbəwiya XTD-V-1-∅ XTD-V0('do')-RED-PST V1-∅ V-1'-∅ V1'-∅	first lengthening is not LLI; second, unclear; multiple red patterns (incl. Echo RED)	a:::rakbəwiya n-aka nanəngkwarba nu:::-ngurrkbalija-Ø=m akən fridge=la door=a ni-yen-jama:::-Ø nu-ngurrbalija-Ø=ma ni-dharra-Ø-ma ani nu-ngurrbalija-Ø=ma nganing ni-dharra-Ø=ma arakb-urakbəwiya	XTD.long.ago 3M-that 3M.man REAL.3M>NEUT.XTD-open-USP=MUT NEUT.that NEUT.fridge=LOC NEUT.door=PF REAL.3M-REDUP-do.XTD-PST REAL.3M>NEUT-open-USP=MUT REAL.3M>NEUT-close-USP=MUT ? REAL.3M>NEUT-open-USP=MUT ? REAL.3M>NEUT-close-USP=MUT REDUP-long.ago	‘a long, long time ago the man opened and closed the fridge over and over again’	ST, JRB1-037-02, 00:07:01-00:07:21	elicitation (video stimuli)
ngurrkw-arrnga	make.bush.shelter [bush.shelter+cut]	non-atomic telic	COS INCR Q	closed max	y	IMPFV	m	x	x	x	Backgr	present	PrMod	adhuwaba V1-∅		adhuwaba n-aka nenəngkwarba nu-ngurrkw-arrnga-Ø amiyerriya	today 3M-that 3M.man REAL.3M-bush.shelter?-cut-USP NEUT.shelter	‘Today he’s making a bush shelter’	JL, JRB1-050-01, 00.26.06-00.26.12	elicitation (flash card stimuli)
kwarra	break; break.up	non-atomic telic	COS INCR Q	closed max	y	PFV	x	ctx	x	x	Narr	past	∅	V1-∅		n-akəna nenəngkwarba nu-kwarra-Ø=m ayika saw	3M-that 3M.man REAL.3M>NEUT-break.up-USP=MUT NEUT.tree NEUT.saw	‘The man broke the tree [with a] saw’	CW, JRB1-032-01, 00.07.23	elicitation (video stimuli)
[truncated: 24 more rows]

## Sheet: Atelic dynamic
engkərrka	think; listen	activity	CUM	n	y	IMPFV	x	t	x	c	Backgr	past	SoE-PST DiscCon	V0-PST akwa V1-∅		n-akən James=a n-ardi-nga-ma n-abən nenəngkwarba akwa n-engkərrka-Ø	3M-that James=PF REAL.3M-call.out-PST=MUT 3M-that 3M.man and REAL.3M-listen-USP	‘James called out to that boy, and he listened’	ST, JRB1-054-01, 00.22.57-00.23.06	past	elicitation (translation task)
[truncated: 27 more rows]

## Sheet: Stative
wara	refuse.to	neg.state	CUM STATE	dna	?	IMPFV	x	t	x	p	BackFore (Explanation) + V-PST	past	Overlap-PST SoE parataxis	V1-∅ V2-PST		yingu-wara-Ø raja, nanga-kwa-Ø anhənga angakəna-mərriya yilyakwa, yimumarnda ying-ayiji-na nenga-beka-ju-wa cup=mərra tea yingu-bekə-na, neni-yemin-jema-Ø nen-amb-ambilyu:::=wa, nenu-mungkwula	REAL.3F-refuse.to-USP NEUT.rice REAL.3M>3F-give-PST NEUT.food whats.it.called-the.rest MASC.sugarbag MASC.freshwater.turtle REAL.3F-stand-PST REAL.3M>3F-drink-CAUS-PST NEUT.cup=INST NEUT.tea REAL.3F-drink-PST REAL.3M.DU-REDUP-do-PST REAL.3M.DU-REDUP-stay.PST.XTD=PL REAL.3M.DU-sleep.PST	‘She didn’t want it [the rice] and so he gave her the food and the sugarbag and water turtles and she ate it and gave her a cup of tea and she drank the tea. They both kept on staying there and both went to sleep’	BB, A3370a Side1, a5.8 Diyaburaka-langwa	past	narrative
[truncated: 22 more rows]

[truncated: 12 more sheets: non-atomic telic, All COS,  Atomic telic, telic, CUM UBD, COS non-telic, BD activities iterated events, All dynamic, Ctxt Past COS, Ctxt Past CUM, Ctxt Pres CUM, Ctxt Pres COS]
