# Supplementary figures and images for: Aspectuo-Temporal Underspecification in Anindilyakwa: Descriptive, Theoretical, Typological and Quantitative Issues
Source: Preprints.org preprint supplement (doi:10.20944/preprints202201.0075.v1), 2022-01-06

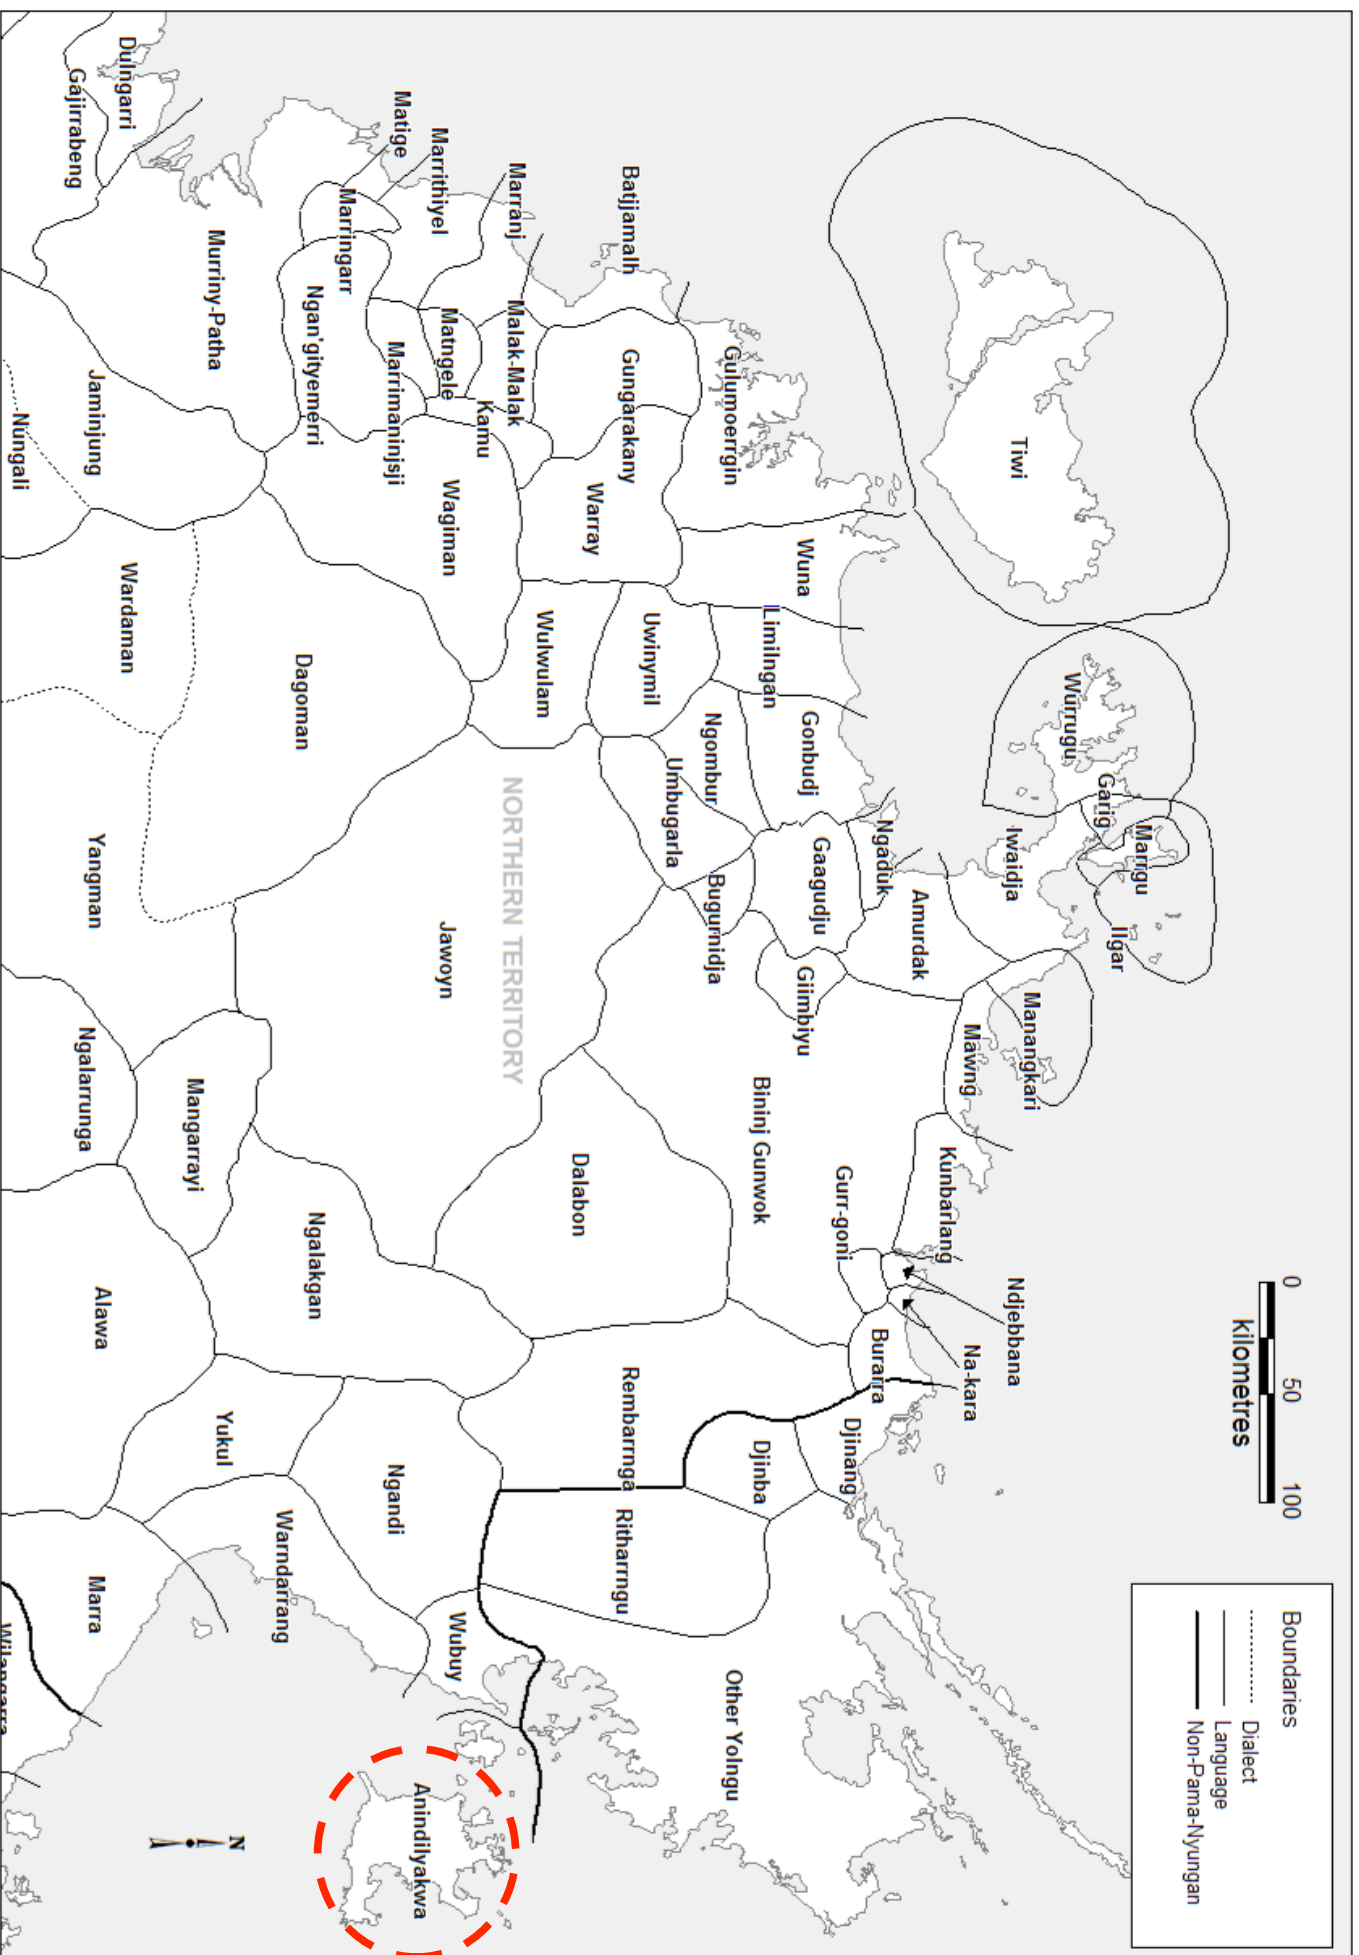

Supplement: Supplementary file 1 [file supplementary]
